# Supplementary material for: Resurrecting essential amino acid biosynthesis in mammalian cells
Source: eLife journal article supplement (doi:10.7554/elife.72847), 2022-09-27
Supplement: supp [file Figure 1-figure supplement 1-source data 1.xlsx]

## Sheet: Sheet1
Number	File Name	Date & Time	Type	Total Concentration	Total cells counted	Live concentration	Live cells counted	Dead concentration	Dead cells counted	Viability (%)	Avgerage Size (um)	Cube 1 name	Cube 1 concentration	Cube 1 (%)	Cube 1 cells counted	Cube 2 name	Cube 2 concentration	Cube 2 (%)	Cube 2 cells counted	Cube 1+2 concentration	Cube 1+2 (%)	Cube 1+2 cells counted	Focus value	BF Light intensity	Live Size min	Live Size max	Live Brightness min	Live Brightness max	Live Circularity	Dead Size min	Dead Size max	Dead Bright min	Dead Bright max	Dead Circ	Cube 1 Light intensity	Cube 2 Light intensity	BF Size min	BF Size max	BF Brightness min	BF Brightness max	BF Circularity	Cube 1 Brightness min	Cub 1 Brightness max	Cube 2 Brightness min	Cube 2 Brightness max	Profile name	Software Revision
0	FlpCHO 0% lysine #1 5.15.17	05.16.2017 05:42:31 AM	BF	146620	25	23459	4	123161	21	16	5.84		0	0	0		0	0	0	0	0	0	2868	5	0	60	0	184.167	0.684746	0	60	0	255	0.575757	0	0	0	0	0	0	0	0	0	0	0	Default	1.0.238
1	FlpCHO 0% lysine #2 5.15.17	05.16.2017 05:43:42 AM	BF	117296	20	11730	2	105566	18	10	8.8		0	0	0		0	0	0	0	0	0	2868	5	0	60	0	184.167	0.540792	0	60	0	255	0.519386	0	0	0	0	0	0	0	0	0	0	0	Default	1.0.238
2	FlpCHO 5% lysine #1 5.15.17	05.16.2017 05:46:25 AM	BF	87972	15	58648	10	29324	5	66.6667	19.4		0	0	0		0	0	0	0	0	0	2845	5	0	60	0	184.167	0.711625	0	60	0	255	0.604459	0	0	0	0	0	0	0	0	0	0	0	Default	1.0.238
3	FlpCHO 5% lysine #2 5.15.17	05.16.2017 05:47:40 AM	BF	70378	12	70378	12	0	0	100	22.8333		0	0	0		0	0	0	0	0	0	2847	5	0	60	0	184.167	0.620165	0	60	0	255	0.526487	0	0	0	0	0	0	0	0	0	0	0	Default	1.0.238
4	FlpCHO 10% lysine #1 5.15.17	05.16.2017 05:50:26 AM	BF	293240	50	252186	43	41054	7	86	20.04		0	0	0		0	0	0	0	0	0	2844	5	0	60	0	184.167	0.552562	0	60	0	255	0.605881	0	0	0	0	0	0	0	0	0	0	0	Default	1.0.238
5	FlpCHO 10% lysine #2 5.15.17	05.16.2017 05:51:07 AM	BF	316699	54	281510	48	35189	6	88.8889	20.037		0	0	0		0	0	0	0	0	0	2858	5	0	60	0	184.167	0.721351	0	60	0	255	0.532211	0	0	0	0	0	0	0	0	0	0	0	Default	1.0.238
6	FlpCHO 25% lysine #1 5.15.17	05.16.2017 05:53:10 AM	BF	709640	121	639263	109	70378	12	90.0826	19.3802		0	0	0		0	0	0	0	0	0	2837	5	0	60	0	184.167	0.743482	0	60	0	255	0.604347	0	0	0	0	0	0	0	0	0	0	0	Default	1.0.238
7	FlpCHO 25% lysine #2 5.15.17	05.16.2017 05:53:56 AM	BF	639263	109	621668	106	17594	3	97.2477	20.4404		0	0	0		0	0	0	0	0	0	2849	5	0	60	0	184.167	0.639206	0	60	0	255	0.494922	0	0	0	0	0	0	0	0	0	0	0	Default	1.0.238
8	FlpCHO 50% lysine #1 5.15.17	05.16.2017 05:56:08 AM	BF	791747	135	703776	120	87972	15	88.8889	19.9556		0	0	0		0	0	0	0	0	0	2842	5	0	60	0	184.167	0.728295	0	60	0	255	0.605881	0	0	0	0	0	0	0	0	0	0	0	Default	1.0.238
9	FlpCHO 50% lysine #2 5.15.17	05.16.2017 05:56:49 AM	BF	650992	111	592344	101	58648	10	90.991	18.6216		0	0	0		0	0	0	0	0	0	2856	5	0	60	0	184.167	0.656022	0	60	0	255	0.550895	0	0	0	0	0	0	0	0	0	0	0	Default	1.0.238
10	FlpCHO 100% lysine #1 5.15.17	05.16.2017 05:59:34 AM	BF	979421	167	932503	159	46918	8	95.2096	20.1856		0	0	0		0	0	0	0	0	0	2834	5	0	60	0	184.167	0.569082	0	60	0	255	0.502119	0	0	0	0	0	0	0	0	0	0	0	Default	1.0.238
11	FlpCHO 100% lysine #2 5.15.17	05.16.2017 06:00:35 AM	BF	697911	119	668587	114	29324	5	95.7983	19.9076		0	0	0		0	0	0	0	0	0	2848	5	0	60	0	184.167	0.701374	0	60	0	255	0.555307	0	0	0	0	0	0	0	0	0	0	0	Default	1.0.238
12	FlpCHO 0% phenylalanine #1 5.15.17	05.16.2017 06:23:47 AM	BF	82107	14	11730	2	70378	12	14.2857	9.5		0	0	0		0	0	0	0	0	0	2862	5	0	60	0	184.167	0.598304	0	60	0	255	0.54409	0	0	0	0	0	0	0	0	0	0	0	Default	1.0.238
13	FlpCHO 0% phenylalanine #2 5.15.17	05.16.2017 06:24:32 AM	BF	93837	16	17594	3	76242	13	18.75	7.5		0	0	0		0	0	0	0	0	0	2868	5	0	60	0	184.167	0.594006	0	60	0	255	0.555307	0	0	0	0	0	0	0	0	0	0	0	Default	1.0.238
14	FlpCHO 5% phenylalanine #1 5.15.17	05.16.2017 06:27:14 AM	BF	93837	16	58648	10	35189	6	62.5	20.1875		0	0	0		0	0	0	0	0	0	2837	5	0	60	0	184.167	0.778786	0	60	0	255	0.528469	0	0	0	0	0	0	0	0	0	0	0	Default	1.0.238
15	FlpCHO 5% phenylalanine #2 5.15.17	05.16.2017 06:28:02 AM	BF	99702	17	93837	16	5865	1	94.1176	18.5294		0	0	0		0	0	0	0	0	0	2848	5	0	60	0	184.167	0.615814	0	60	0	255	0.538181	0	0	0	0	0	0	0	0	0	0	0	Default	1.0.238
16	FlpCHO 10% phenylalanine #1 5.15.17	05.16.2017 06:30:07 AM	BF	99702	17	58648	10	41054	7	58.8235	18.7059		0	0	0		0	0	0	0	0	0	2833	5	0	60	0	184.167	0.748437	0	60	0	255	0.604347	0	0	0	0	0	0	0	0	0	0	0	Default	1.0.238
17	FlpCHO 10% phenylalanine #2 5.15.17	05.16.2017 06:30:45 AM	BF	76242	13	46918	8	29324	5	61.5385	17		0	0	0		0	0	0	0	0	0	2853	5	0	60	0	184.167	0.750644	0	60	0	255	0.604347	0	0	0	0	0	0	0	0	0	0	0	Default	1.0.238
18	FlpCHO 25% phenylalanine #1 5.15.17	05.16.2017 06:32:35 AM	BF	275645	47	258051	44	17594	3	93.617	21.0851		0	0	0		0	0	0	0	0	0	2835	5	0	60	0	184.167	0.637205	0	60	0	255	0.544164	0	0	0	0	0	0	0	0	0	0	0	Default	1.0.238
19	FlpCHO 25% phenylalanine #2 5.15.17	05.16.2017 06:33:14 AM	BF	205268	35	187673	32	17594	3	91.4286	20.8		0	0	0		0	0	0	0	0	0	2843	5	0	60	0	184.167	0.796728	0	60	0	255	0.605881	0	0	0	0	0	0	0	0	0	0	0	Default	1.0.238
20	FlpCHO 50% phenylalanine #1 5.15.17	05.16.2017 06:40:33 AM	BF	498508	85	469184	80	29324	5	94.1176	19.7176		0	0	0		0	0	0	0	0	0	2837	5	0	60	0	184.167	0.699807	0	60	0	255	0.602728	0	0	0	0	0	0	0	0	0	0	0	Default	1.0.238
21	FlpCHO 50% phenylalanine #2 5.15.17	05.16.2017 06:41:12 AM	BF	680316	116	645128	110	35189	6	94.8276	20.6983		0	0	0		0	0	0	0	0	0	2850	5	0	60	0	184.167	0.666882	0	60	0	255	0.605881	0	0	0	0	0	0	0	0	0	0	0	Default	1.0.238
22	FlpCHO 100% phenylalanine #1 5.15.17	05.16.2017 06:43:16 AM	BF	826936	141	762423	130	64513	11	92.1986	20.5674		0	0	0		0	0	0	0	0	0	2837	5	0	60	0	184.167	0.684415	0	60	0	255	0.544164	0	0	0	0	0	0	0	0	0	0	0	Default	1.0.238
23	FlpCHO 100% phenylalanine #2 5.15.17	05.16.2017 06:43:56 AM	BF	680316	116	668587	114	11730	2	98.2759	19.431		0	0	0		0	0	0	0	0	0	2855	5	0	60	0	184.167	0.667432	0	60	0	255	0.593768	0	0	0	0	0	0	0	0	0	0	0	Default	1.0.238
24	FlpCHO 0% tryptophan #1 5.15.17	05.16.2017 06:55:47 AM	BF	123161	21	123161	21	0	0	100	18.8571		0	0	0		0	0	0	0	0	0	2836	5	0	60	0	184.167	0.733609	0	60	0	255	0.619314	0	0	0	0	0	0	0	0	0	0	0	Default	1.0.238
25	FlpCHO 0% tryptophan #2 5.15.17	05.16.2017 06:56:40 AM	BF	76242	13	29324	5	46918	8	38.4615	19.3846		0	0	0		0	0	0	0	0	0	2842	5	0	60	0	184.167	0.758112	0	60	0	255	0.583742	0	0	0	0	0	0	0	0	0	0	0	Default	1.0.238
26	FlpCHO 5% tryptophan #1 5.15.17	05.16.2017 06:58:57 AM	BF	105566	18	87972	15	17594	3	83.3333	19.2778		0	0	0		0	0	0	0	0	0	2838	5	0	60	0	184.167	0.605587	0	60	0	255	0.648522	0	0	0	0	0	0	0	0	0	0	0	Default	1.0.238
27	FlpCHO 5% tryptophan #2 5.15.17	05.16.2017 06:59:43 AM	BF	111431	19	105566	18	5865	1	94.7368	19.8947		0	0	0		0	0	0	0	0	0	2842	5	0	60	0	184.167	0.607024	0	60	0	255	0.604347	0	0	0	0	0	0	0	0	0	0	0	Default	1.0.238
28	FlpCHO 10% tryptophan #1 5.15.17	05.16.2017 07:02:09 AM	BF	392941	67	152485	26	240457	41	38.806	10.2239		0	0	0		0	0	0	0	0	0	2875	7	0	60	0	184.167	0.654048	0	60	0	255	0.494922	0	0	0	0	0	0	0	0	0	0	0	Default	1.0.238
29	FlpCHO 10% tryptophan #2 5.15.17	05.16.2017 07:03:12 AM	BF	170079	29	158349	27	11730	2	93.1034	20.8621		0	0	0		0	0	0	0	0	0	2849	5	0	60	0	184.167	0.736547	0	60	0	255	0.491642	0	0	0	0	0	0	0	0	0	0	0	Default	1.0.238
30	FlpCHO 25% tryptophan #1 5.15.17	05.16.2017 07:05:22 AM	BF	592344	101	545426	93	46918	8	92.0792	20.2475		0	0	0		0	0	0	0	0	0	2836	6	0	60	0	184.167	0.62992	0	60	0	255	0.605881	0	0	0	0	0	0	0	0	0	0	0	Default	1.0.238
31	FlpCHO 25% tryptophan #2 5.15.17	05.16.2017 07:08:59 AM	BF	322564	55	304969	52	17594	3	94.5455	19.8909		0	0	0		0	0	0	0	0	0	2845	5	0	60	0	184.167	0.704486	0	60	0	255	0.579937	0	0	0	0	0	0	0	0	0	0	0	Default	1.0.238
32	FlpCHO 50% tryptophan #1 5.15.17	05.16.2017 07:11:00 AM	BF	645128	110	627533	107	17594	3	97.2727	21.6909		0	0	0		0	0	0	0	0	0	2835	5	0	60	0	184.167	0.663809	0	60	0	255	0.605881	0	0	0	0	0	0	0	0	0	0	0	Default	1.0.238
33	FlpCHO 50% tryptophan #2 5.15.17	05.16.2017 07:11:49 AM	BF	521967	89	475048	81	46918	8	91.0112	19.6629		0	0	0		0	0	0	0	0	0	2845	5	0	60	0	184.167	0.655442	0	60	0	255	0.605881	0	0	0	0	0	0	0	0	0	0	0	Default	1.0.238
34	FlpCHO 100% tryptophan #1 5.15.17	05.16.2017 07:13:29 AM	BF	692046	118	680316	116	11730	2	98.3051	19.7966		0	0	0		0	0	0	0	0	0	2829	5	0	60	0	184.167	0.596041	0	60	0	255	0.602753	0	0	0	0	0	0	0	0	0	0	0	Default	1.0.238
35	FlpCHO 100% tryptophan #2 5.15.17	05.16.2017 07:14:13 AM	BF	774153	132	762423	130	11730	2	98.4848	20.6136		0	0	0		0	0	0	0	0	0	2848	5	0	60	0	184.167	0.693028	0	60	0	255	0.604347	0	0	0	0	0	0	0	0	0	0	0	Default	1.0.238
36	FlpCHO 0% tyrosine #1 5.15.17	05.16.2017 07:25:51 AM	BF	99702	17	5865	1	93837	16	5.88235	5.94118		0	0	0		0	0	0	0	0	0	2868	5	0	60	0	184.167	0.698955	0	60	0	255	0.605881	0	0	0	0	0	0	0	0	0	0	0	Default	1.0.238
37	FlpCHO 0% tyrosine #2 5.15.17	05.16.2017 07:26:29 AM	BF	70378	12	35189	6	35189	6	50	8.33333		0	0	0		0	0	0	0	0	0	2855	5	0	60	0	184.167	0.648154	0	60	0	255	0.494922	0	0	0	0	0	0	0	0	0	0	0	Default	1.0.238
38	FlpCHO 5% tyrosine #1 5.15.17	05.16.2017 07:28:26 AM	BF	76242	13	52783	9	23459	4	69.2308	18.0769		0	0	0		0	0	0	0	0	0	2833	5	0	60	0	184.167	0.691234	0	60	0	255	0.511817	0	0	0	0	0	0	0	0	0	0	0	Default	1.0.238
39	FlpCHO 5% tyrosine #2 5.15.17	05.16.2017 07:30:19 AM	BF	111431	19	82107	14	29324	5	73.6842	12.2632		0	0	0		0	0	0	0	0	0	2846	5	0	60	0	184.167	0.639042	0	60	0	255	0.605881	0	0	0	0	0	0	0	0	0	0	0	Default	1.0.238
40	FlpCHO 10% tyrosine #1 5.15.17	05.16.2017 07:31:17 AM	BF	111431	19	105566	18	5865	1	94.7368	18.6316		0	0	0		0	0	0	0	0	0	2842	6	0	60	0	184.167	0.695097	0	60	0	255	0.587316	0	0	0	0	0	0	0	0	0	0	0	Default	1.0.238
41	FlpCHO 10% tyrosine #2 5.15.17	05.16.2017 07:31:59 AM	BF	187673	32	170079	29	17594	3	90.625	13.8125		0	0	0		0	0	0	0	0	0	2857	5	0	60	0	184.167	0.671228	0	60	0	255	0.494922	0	0	0	0	0	0	0	0	0	0	0	Default	1.0.238
42	FlpCHO 25% tyrosine #1 5.15.17	05.16.2017 07:36:36 AM	BF	287375	49	263916	45	23459	4	91.8367	20.2245		0	0	0		0	0	0	0	0	0	2833	5	0	60	0	184.167	0.694158	0	60	0	255	0.602753	0	0	0	0	0	0	0	0	0	0	0	Default	1.0.238
43	FlpCHO 25% tyrosine #2 5.15.17	05.16.2017 07:37:39 AM	BF	299105	51	199403	34	99702	17	66.6667	19.3137		0	0	0		0	0	0	0	0	0	2849	5	0	60	0	184.167	0.640473	0	60	0	255	0.626001	0	0	0	0	0	0	0	0	0	0	0	Default	1.0.238
44	FlpCHO 50% tyrosine #1 5.15.17	05.16.2017 07:39:12 AM	BF	516102	88	469184	80	46918	8	90.9091	20.2841		0	0	0		0	0	0	0	0	0	2839	5	0	60	0	184.167	0.709085	0	60	0	255	0.520611	0	0	0	0	0	0	0	0	0	0	0	Default	1.0.238
45	FlpCHO 50% tyrosine #2 5.15.17	05.16.2017 07:39:50 AM	BF	445725	76	410536	70	35189	6	92.1053	20.2632		0	0	0		0	0	0	0	0	0	2851	5	0	60	0	184.167	0.72683	0	60	0	255	0.494808	0	0	0	0	0	0	0	0	0	0	0	Default	1.0.238
46	FlpCHO 100% tyrosine #1 5.15.17	05.16.2017 07:42:13 AM	BF	721370	123	668587	114	52783	9	92.6829	20.5935		0	0	0		0	0	0	0	0	0	2833	5	0	60	0	184.167	0.679253	0	60	0	255	0.604347	0	0	0	0	0	0	0	0	0	0	0	Default	1.0.238
47	FlpCHO 100% tyrosine #2 5.15.17	05.16.2017 07:42:55 AM	BF	768288	131	738964	126	29324	5	96.1832	19.3053		0	0	0		0	0	0	0	0	0	2852	5	0	60	0	184.167	0.625506	0	60	0	255	0.497502	0	0	0	0	0	0	0	0	0	0	0	Default	1.0.238
48	FlpCHO 0% histidine #1 5.15.17	05.16.2017 07:53:04 AM	BF	146620	25	29324	5	117296	20	20	5.44		0	0	0		0	0	0	0	0	0	2830	5	0	60	0	184.167	0.632942	0	60	0	255	0.484961	0	0	0	0	0	0	0	0	0	0	0	Default	1.0.238
49	FlpCHO 0% histidine #2 5.15.17	05.16.2017 07:53:44 AM	BF	52783	9	11730	2	41054	7	22.2222	2.11111		0	0	0		0	0	0	0	0	0	2868	5	0	60	0	184.167	0.738531	0	60	0	255	0.507567	0	0	0	0	0	0	0	0	0	0	0	Default	1.0.238
50	FlpCHO 5% histidine #1 5.15.17	05.16.2017 07:55:28 AM	BF	258051	44	252186	43	5865	1	97.7273	21.4773		0	0	0		0	0	0	0	0	0	2827	5	0	60	0	184.167	0.765377	0	60	0	255	0.544164	0	0	0	0	0	0	0	0	0	0	0	Default	1.0.238
51	FlpCHO 5% histidine #2 5.15.17	05.16.2017 07:56:04 AM	BF	252186	43	222862	38	29324	5	88.3721	19.907		0	0	0		0	0	0	0	0	0	2850	5	0	60	0	184.167	0.633977	0	60	0	255	0.605881	0	0	0	0	0	0	0	0	0	0	0	Default	1.0.238
52	FlpCHO 10% histidine #1 5.15.17	05.16.2017 07:57:43 AM	BF	633398	108	580615	99	52783	9	91.6667	20.6204		0	0	0		0	0	0	0	0	0	2833	5	0	60	0	184.167	0.63419	0	60	0	255	0.552859	0	0	0	0	0	0	0	0	0	0	0	Default	1.0.238
53	FlpCHO 10% histidine #2 5.15.17	05.16.2017 07:58:23 AM	BF	527832	90	486778	83	41054	7	92.2222	19.9444		0	0	0		0	0	0	0	0	0	2846	5	0	60	0	184.167	0.694699	0	60	0	255	0.579937	0	0	0	0	0	0	0	0	0	0	0	Default	1.0.238
54	FlpCHO 25% histidine #1 5.15.17	05.16.2017 07:59:47 AM	BF	539561	92	516102	88	23459	4	95.6522	21.3043		0	0	0		0	0	0	0	0	0	2836	6	0	60	0	184.167	0.653704	0	60	0	255	0.605881	0	0	0	0	0	0	0	0	0	0	0	Default	1.0.238
55	FlpCHO 25% histidine #2 5.15.17	05.16.2017 08:00:24 AM	BF	680316	116	656857	112	23459	4	96.5517	20.7414		0	0	0		0	0	0	0	0	0	2849	6	0	60	0	184.167	0.627448	0	60	0	255	0.507287	0	0	0	0	0	0	0	0	0	0	0	Default	1.0.238
56	FlpCHO 50% histidine #1 5.15.17	05.16.2017 08:01:58 AM	BF	774153	132	709640	121	64513	11	91.6667	19.7045		0	0	0		0	0	0	0	0	0	2831	5	0	60	0	184.167	0.668806	0	60	0	255	0.519256	0	0	0	0	0	0	0	0	0	0	0	Default	1.0.238
57	FlpCHO 50% histidine #2 5.15.17	05.16.2017 08:03:40 AM	BF	838666	143	762423	130	76242	13	90.9091	20.2308		0	0	0		0	0	0	0	0	0	2849	5	0	60	0	184.167	0.660942	0	60	0	255	0.605881	0	0	0	0	0	0	0	0	0	0	0	Default	1.0.238
58	FlpCHO 100% histidine #1 5.15.17	05.16.2017 08:04:23 AM	BF	838666	143	727235	124	111431	19	86.7133	19.6224		0	0	0		0	0	0	0	0	0	2837	5	0	60	0	184.167	0.627954	0	60	0	255	0.49162	0	0	0	0	0	0	0	0	0	0	0	Default	1.0.238
59	FlpCHO 100% histidine #2 5.15.17	05.16.2017 08:05:09 AM	BF	903179	154	844531	144	58648	10	93.5065	21.4026		0	0	0		0	0	0	0	0	0	2842	5	0	60	0	184.167	0.676603	0	60	0	255	0.566828	0	0	0	0	0	0	0	0	0	0	0	Default	1.0.238
60	FlpCHO 0% isoleucine #1 5.18.17	05.18.2017 09:38:07 AM	BF	76242	13	5865	1	70378	12	7.69231	7.69231		0	0	0		0	0	0	0	0	0	2868	5	0	60	0	184.167	0.68503	0	60	0	255	0.441149	0	0	0	0	0	0	0	0	0	0	0	Default	1.0.238
61	FlpCHO 0% isoleucine #2 5.18.17	05.18.2017 09:39:32 AM	BF	93837	16	11730	2	82107	14	12.5	5.5625		0	0	0		0	0	0	0	0	0	2860	6	0	60	0	184.167	0.681536	0	60	0	255	0.586379	0	0	0	0	0	0	0	0	0	0	0	Default	1.0.238
62	FlpCHO 5% isoleucine #1 5.18.17	05.18.2017 09:41:55 AM	BF	105566	18	52783	9	52783	9	50	8.55556		0	0	0		0	0	0	0	0	0	2850	6	0	60	0	184.167	0.57624	0	60	0	255	0.601759	0	0	0	0	0	0	0	0	0	0	0	Default	1.0.238
63	FlpCHO 5% isoleucine #2 5.18.17	05.18.2017 09:43:07 AM	BF	152485	26	46918	8	105566	18	30.7692	8.96154		0	0	0		0	0	0	0	0	0	2859	5	0	60	0	184.167	0.633848	0	60	0	255	0.498675	0	0	0	0	0	0	0	0	0	0	0	Default	1.0.238
64	FlpCHO 10% isoleucine #1 5.18.17	05.18.2017 09:46:57 AM	BF	82107	14	82107	14	0	0	100	15.8571		0	0	0		0	0	0	0	0	0	2850	6	0	60	0	247.917	0.686762	0	60	8.5	131.75	0.626001	0	0	0	0	0	0	0	0	0	0	0	Default	1.0.238
65	FlpCHO 10% isoleucine #2 5.18.17	05.18.2017 09:48:48 AM	BF	99702	17	64513	11	35189	6	64.7059	17.0588		0	0	0		0	0	0	0	0	0	2860	5	0	60	0	247.917	0.574657	0	60	8.5	131.75	0.605881	0	0	0	0	0	0	0	0	0	0	0	Default	1.0.238
66	FlpCHO 25% isoleucine #1 5.18.17	05.18.2017 09:50:52 AM	BF	228727	39	199403	34	29324	5	87.1795	16.9487		0	0	0		0	0	0	0	0	0	2846	5	0	60	0	247.917	0.480932	0	60	8.5	131.75	0.605881	0	0	0	0	0	0	0	0	0	0	0	Default	1.0.238
67	FlpCHO 25% isoleucine #2 5.18.17	05.18.2017 09:53:40 AM	BF	398806	68	357753	61	41054	7	89.7059	19.6765		0	0	0		0	0	0	0	0	0	2848	5	0	60	0	247.917	0.494717	0	60	8.5	131.75	0.602753	0	0	0	0	0	0	0	0	0	0	0	Default	1.0.238
68	FlpCHO 50% isoleucine #1 5.18.17	05.18.2017 09:56:19 AM	BF	363617	62	351888	60	11730	2	96.7742	20.5968		0	0	0		0	0	0	0	0	0	2840	5	0	60	0	247.917	0.487569	0	60	8.5	131.75	0.54409	0	0	0	0	0	0	0	0	0	0	0	Default	1.0.238
69	FlpCHO 50% isoleucine #2 5.18.17	05.18.2017 10:00:56 AM	BF	164214	28	158349	27	5865	1	96.4286	16.9286		0	0	0		0	0	0	0	0	0	2844	5	0	60	0	247.917	0.633443	0	60	8.5	131.75	0.579937	0	0	0	0	0	0	0	0	0	0	0	Default	1.0.238
70	FlpCHO 100% isoleucine #1 5.18.17	05.18.2017 10:04:15 AM	BF	416401	71	404671	69	11730	2	97.1831	19.2817		0	0	0		0	0	0	0	0	0	2838	5	0	60	0	247.917	0.552324	0	24	8.5	131.75	0.626001	0	0	0	0	0	0	0	0	0	0	0	Default	1.0.238
71	FlpCHO 100% isoleucine #2 5.18.17	05.18.2017 10:05:20 AM	BF	639263	109	627533	107	11730	2	98.1651	18.5046		0	0	0		0	0	0	0	0	0	2847	6	0	60	0	247.917	0.577453	0	24	8.5	131.75	0.604347	0	0	0	0	0	0	0	0	0	0	0	Default	1.0.238
72	FlpCHO 0% valine #1 5.18.17	05.18.2017 10:20:07 AM	BF	35189	6	5865	1	29324	5	16.6667	12.8333		0	0	0		0	0	0	0	0	0	2879	5	0	60	0	247.917	0.637405	0	24	8.5	131.75	0.364336	0	0	0	0	0	0	0	0	0	0	0	Default	1.0.238
73	FlpCHO 0% valine #2 5.18.17	05.18.2017 10:23:01 AM	BF	17594	3	11730	2	5865	1	66.6667	10.6667		0	0	0		0	0	0	0	0	0	2844	6	0	13	0	247.917	0.617501	0	21	8.5	131.75	0.539027	0	0	0	0	0	0	0	0	0	0	0	Default	1.0.238
74	FlpCHO 5% valine #1 5.18.17	05.18.2017 10:26:06 AM	BF	134890	23	82107	14	52783	9	60.8696	10.6522		0	0	0		0	0	0	0	0	0	2851	5	0	57	0	247.917	0.635838	0	31	8.5	131.75	0.693269	0	0	0	0	0	0	0	0	0	0	0	Default	1.0.238
75	FlpCHO 5% valine #2 5.18.17	05.18.2017 10:27:27 AM	BF	52783	9	46918	8	5865	1	88.8889	19		0	0	0		0	0	0	0	0	0	2841	6	0	57	0	247.917	0.724536	0	31	8.5	131.75	0.70188	0	0	0	0	0	0	0	0	0	0	0	Default	1.0.238
76	FlpCHO 10% valine #1 5.18.17	05.18.2017 10:30:44 AM	BF	181809	31	158349	27	23459	4	87.0968	18.2581		0	0	0		0	0	0	0	0	0	2842	6	0	57	0	247.917	0.793301	0	43	8.5	151.583	0.704934	0	0	0	0	0	0	0	0	0	0	0	Default	1.0.238
77	FlpCHO 10% valine #2 5.18.17	05.18.2017 10:31:38 AM	BF	170079	29	158349	27	11730	2	93.1034	16.3448		0	0	0		0	0	0	0	0	0	2845	6	0	57	0	247.917	0.525481	0	43	8.5	151.583	0.718428	0	0	0	0	0	0	0	0	0	0	0	Default	1.0.238
78	FlpCHO 25% valine #1 5.18.17	05.18.2017 10:33:31 AM	BF	187673	32	164214	28	23459	4	87.5	19.5		0	0	0		0	0	0	0	0	0	2840	5	0	57	0	247.917	0.785319	0	43	8.5	151.583	0.720421	0	0	0	0	0	0	0	0	0	0	0	Default	1.0.238
79	FlpCHO 25% valine #2 5.18.17	05.18.2017 10:34:13 AM	BF	293240	50	258051	44	35189	6	88	18.66		0	0	0		0	0	0	0	0	0	2839	5	0	57	0	247.917	0.579656	0	43	8.5	151.583	0.707567	0	0	0	0	0	0	0	0	0	0	0	Default	1.0.238
80	FlpCHO 50% valine #1 5.18.17	05.18.2017 10:37:06 AM	BF	516102	88	492643	84	23459	4	95.4545	20.3409		0	0	0		0	0	0	0	0	0	2842	6	0	57	0	247.917	0.680772	0	43	8.5	151.583	0.730963	0	0	0	0	0	0	0	0	0	0	0	Default	1.0.238
81	FlpCHO 50% valine #2 5.18.17	05.18.2017 10:38:15 AM	BF	410536	70	387077	66	23459	4	94.2857	20.5571		0	0	0		0	0	0	0	0	0	2843	5	0	57	0	247.917	0.736612	0	43	8.5	151.583	0.749553	0	0	0	0	0	0	0	0	0	0	0	Default	1.0.238
82	FlpCHO 100% valine #1 5.18.17	05.18.2017 10:40:07 AM	BF	445725	76	422265	72	23459	4	94.7368	19.9737		0	0	0		0	0	0	0	0	0	2834	6	0	57	0	247.917	0.628746	0	43	8.5	151.583	0.675197	0	0	0	0	0	0	0	0	0	0	0	Default	1.0.238
83	FlpCHO 100% valine #2 5.18.17	05.18.2017 10:41:07 AM	BF	498508	85	463319	79	35189	6	92.9412	19.0235		0	0	0		0	0	0	0	0	0	2838	6	0	57	0	247.917	0.593571	0	43	8.5	151.583	0.678131	0	0	0	0	0	0	0	0	0	0	0	Default	1.0.238
84	FlpCHO 0% leucine #1 5.18.17	05.18.2017 11:02:44 AM	BF	123161	21	29324	5	93837	16	23.8095	9.76191		0	0	0		0	0	0	0	0	0	2878	6	0	57	0	247.917	0.586063	0	43	8.5	151.583	0.734667	0	0	0	0	0	0	0	0	0	0	0	Default	1.0.238
85	FlpCHO 0% leucine #2 5.18.17	05.18.2017 11:04:24 AM	BF	93837	16	17594	3	76242	13	18.75	17.125		0	0	0		0	0	0	0	0	0	2837	6	0	57	0	247.917	0.750725	0	43	8.5	151.583	0.617567	0	0	0	0	0	0	0	0	0	0	0	Default	1.0.238
86	FlpCHO 5% leucine #1 5.18.17	05.18.2017 11:06:56 AM	BF	158349	27	123161	21	35189	6	77.7778	15.1111		0	0	0		0	0	0	0	0	0	2839	5	0	57	0	247.917	0.479167	0	43	8.5	151.583	0.711083	0	0	0	0	0	0	0	0	0	0	0	Default	1.0.238
87	FlpCHO 5% leucine #2 5.18.17	05.18.2017 11:08:31 AM	BF	93837	16	58648	10	35189	6	62.5	17.125		0	0	0		0	0	0	0	0	0	2837	5	0	57	0	247.917	0.744961	0	43	8.5	151.583	0.67882	0	0	0	0	0	0	0	0	0	0	0	Default	1.0.238
88	FlpCHO 10% leucine #1 5.18.17	05.18.2017 11:11:01 AM	BF	152485	26	117296	20	35189	6	76.9231	17.9231		0	0	0		0	0	0	0	0	0	2831	6	0	57	0	247.917	0.721013	0	43	8.5	151.583	0.659427	0	0	0	0	0	0	0	0	0	0	0	Default	1.0.238
89	FlpCHO 10% leucine #2 5.18.17	05.18.2017 11:12:08 AM	BF	170079	29	152485	26	17594	3	89.6552	16.4828		0	0	0		0	0	0	0	0	0	2843	6	0	57	0	247.917	0.707225	0	43	8.5	151.583	0.734358	0	0	0	0	0	0	0	0	0	0	0	Default	1.0.238
90	FlpCHO 25% leucine #1 5.18.17	05.18.2017 11:15:21 AM	BF	357753	61	322564	55	35189	6	90.1639	18.1475		0	0	0		0	0	0	0	0	0	2846	5	0	57	0	247.917	0.415353	0	43	8.5	151.583	0.669598	0	0	0	0	0	0	0	0	0	0	0	Default	1.0.238
91	FlpCHO 25% leucine #2 5.18.17	05.18.2017 11:16:31 AM	BF	299105	51	269781	46	29324	5	90.1961	20.1961		0	0	0		0	0	0	0	0	0	2836	6	0	57	0	247.917	0.595585	0	43	8.5	151.583	0.665191	0	0	0	0	0	0	0	0	0	0	0	Default	1.0.238
92	FlpCHO 50% leucine #1 5.18.17	05.18.2017 11:18:37 AM	BF	375347	64	369482	63	5865	1	98.4375	19.5		0	0	0		0	0	0	0	0	0	2830	5	0	57	0	247.917	0.537279	0	43	8.5	151.583	0.787033	0	0	0	0	0	0	0	0	0	0	0	Default	1.0.238
93	FlpCHO 50% leucine #2 5.18.17	05.18.2017 11:20:02 AM	BF	463319	79	416401	71	46918	8	89.8734	17.6709		0	0	0		0	0	0	0	0	0	2840	6	0	57	0	247.917	0.333971	0	11	8.5	151.583	0.704473	0	0	0	0	0	0	0	0	0	0	0	Default	1.0.238
94	FlpCHO 100% leucine #1 5.18.17	05.18.2017 11:22:57 AM	BF	181809	31	175944	30	5865	1	96.7742	19.1613		0	0	0		0	0	0	0	0	0	2838	5	0	57	0	247.917	0.624268	0	11	8.5	151.583	0.704469	0	0	0	0	0	0	0	0	0	0	0	Default	1.0.238
95	FlpCHO 100% leucine #2 5.18.17	05.18.2017 11:23:40 AM	BF	416401	71	404671	69	11730	2	97.1831	19.3099		0	0	0		0	0	0	0	0	0	2841	5	0	57	0	247.917	0.644854	0	11	8.5	151.583	0.730253	0	0	0	0	0	0	0	0	0	0	0	Default	1.0.238
96	FlpCHO 0% threonine #1 5.18.17	05.18.2017 11:52:03 AM	BF	29324	5	0	0	29324	5	0	6.4		0	0	0		0	0	0	0	0	0	2868	5	0	57	0	247.917	0.644854	0	11	8.5	151.583	0.667022	0	0	0	0	0	0	0	0	0	0	0	Default	1.0.238
97	FlpCHO 0% threonine #2 5.18.17	05.18.2017 11:53:05 AM	BF	46918	8	0	0	46918	8	0	3.375		0	0	0		0	0	0	0	0	0	2854	6	0	57	0	247.917	0.644854	0	11	8.5	151.583	0.727051	0	0	0	0	0	0	0	0	0	0	0	Default	1.0.238
98	FlpCHO 5% threonine #1 5.18.17	05.18.2017 11:54:57 AM	BF	93837	16	76242	13	17594	3	81.25	17.75		0	0	0		0	0	0	0	0	0	2829	6	0	57	0	247.917	0.755266	0	11	8.5	151.583	0.718855	0	0	0	0	0	0	0	0	0	0	0	Default	1.0.238
99	FlpCHO 5% threonine #2 5.18.17	05.18.2017 11:55:34 AM	BF	93837	16	70378	12	23459	4	75	12.125		0	0	0		0	0	0	0	0	0	2844	6	0	57	0	247.917	0.626001	0	11	8.5	151.583	0.697115	0	0	0	0	0	0	0	0	0	0	0	Default	1.0.238
100	FlpCHO 10% threonine #1 5.18.17	05.18.2017 11:57:09 AM	BF	140755	24	123161	21	17594	3	87.5	18.9583		0	0	0		0	0	0	0	0	0	2834	6	0	57	0	247.917	0.683602	0	11	8.5	151.583	0.667839	0	0	0	0	0	0	0	0	0	0	0	Default	1.0.238
101	FlpCHO 10% threonine #2 5.18.17	05.18.2017 11:58:37 AM	BF	170079	29	140755	24	29324	5	82.7586	15.2759		0	0	0		0	0	0	0	0	0	2835	5	0	23	0	247.917	0.771415	0	11	8.5	151.583	0.682009	0	0	0	0	0	0	0	0	0	0	0	Default	1.0.238
102	FlpCHO 25% threonine #1 5.18.17	05.18.2017 12:01:53 AM	BF	263916	45	240457	41	23459	4	91.1111	18.6222		0	0	0		0	0	0	0	0	0	2837	6	0	40	0	247.917	0.805318	0	16	8.5	151.583	0.71538	0	0	0	0	0	0	0	0	0	0	0	Default	1.0.238
103	FlpCHO 25% threonine #2 5.18.17	05.18.2017 12:02:32 AM	BF	387077	66	357753	61	29324	5	92.4242	19.3788		0	0	0		0	0	0	0	0	0	2836	5	0	40	0	247.917	0.844808	0	16	8.5	151.583	0.712695	0	0	0	0	0	0	0	0	0	0	0	Default	1.0.238
104	FlpCHO 50% threonine #1 5.18.17	05.18.2017 12:04:03 AM	BF	340158	58	322564	55	17594	3	94.8276	19.7241		0	0	0		0	0	0	0	0	0	2833	6	0	40	0	247.917	0.776568	0	16	8.5	151.583	0.703643	0	0	0	0	0	0	0	0	0	0	0	Default	1.0.238
105	FlpCHO 50% threonine #2 5.18.17	05.18.2017 12:05:05 AM	BF	410536	70	410536	70	0	0	100	20.9571		0	0	0		0	0	0	0	0	0	2837	6	0	50	0	247.917	0.725476	0	16	8.5	151.583	0.7247	0	0	0	0	0	0	0	0	0	0	0	Default	1.0.238
106	FlpCHO 100% threonine #1 5.18.17	05.18.2017 12:07:00 AM	BF	363617	62	346023	59	17594	3	95.1613	20.5806		0	0	0		0	0	0	0	0	0	2830	5	0	50	0	247.917	0.752826	0	16	8.5	151.583	0.763767	0	0	0	0	0	0	0	0	0	0	0	Default	1.0.238
107	FlpCHO 100% threonine #2 5.18.17	05.18.2017 12:08:07 AM	BF	463319	79	422265	72	41054	7	91.1392	19.7215		0	0	0		0	0	0	0	0	0	2842	6	0	50	0	247.917	0.766452	0	16	8.5	151.583	0.708663	0	0	0	0	0	0	0	0	0	0	0	Default	1.0.238
108	FlpCHO 0% methionine #1 5.18.17	05.18.2017 12:09:58 AM	BF	41054	7	5865	1	35189	6	14.2857	3.57143		0	0	0		0	0	0	0	0	0	2897	5	0	50	0	247.917	0.729567	0	16	8.5	151.583	0.593712	0	0	0	0	0	0	0	0	0	0	0	Default	1.0.238
109	FlpCHO 0% methionine #2 5.18.17	05.18.2017 12:11:01 AM	BF	41054	7	23459	4	17594	3	57.1429	8.71429		0	0	0		0	0	0	0	0	0	2860	6	0	46	0	247.917	0.691746	0	16	8.5	151.583	0.753493	0	0	0	0	0	0	0	0	0	0	0	Default	1.0.238
110	FlpCHO 5% methionine #1 5.18.17	05.18.2017 12:14:36 AM	BF	46918	8	29324	5	17594	3	62.5	16.625		0	0	0		0	0	0	0	0	0	2840	5	0	46	0	247.917	0.783787	0	16	8.5	151.583	0.803208	0	0	0	0	0	0	0	0	0	0	0	Default	1.0.238
111	FlpCHO 5% methionine #2 5.18.17	05.18.2017 12:15:35 AM	BF	82107	14	70378	12	11730	2	85.7143	17.9286		0	0	0		0	0	0	0	0	0	2852	5	0	60	0	247.917	0.780236	0	16	8.5	151.583	0.796675	0	0	0	0	0	0	0	0	0	0	0	Default	1.0.238
112	FlpCHO 10% methionine #1 5.18.17	05.18.2017 12:17:15 AM	BF	123161	21	123161	21	0	0	100	14.1429		0	0	0		0	0	0	0	0	0	2846	6	0	60	0	247.917	0.649095	0	16	8.5	151.583	0.843282	0	0	0	0	0	0	0	0	0	0	0	Default	1.0.238
113	FlpCHO 10% methionine #2 5.18.17	05.18.2017 12:17:57 AM	BF	140755	24	105566	18	35189	6	75	14.5417		0	0	0		0	0	0	0	0	0	2861	5	0	60	0	247.917	0.592874	0	16	8.5	151.583	0.806074	0	0	0	0	0	0	0	0	0	0	0	Default	1.0.238
114	FlpCHO 25% methionine #1 5.18.17	05.18.2017 12:21:09 AM	BF	263916	45	216997	37	46918	8	82.2222	15.3333		0	0	0		0	0	0	0	0	0	2842	6	0	60	0	247.917	0.600336	0	16	8.5	151.583	0.784802	0	0	0	0	0	0	0	0	0	0	0	Default	1.0.238
115	FlpCHO 25% methionine #2 5.18.17	05.18.2017 12:21:43 AM	BF	351888	60	340158	58	11730	2	96.6667	18.7		0	0	0		0	0	0	0	0	0	2855	5	0	60	0	247.917	0.589762	0	16	8.5	151.583	0.796667	0	0	0	0	0	0	0	0	0	0	0	Default	1.0.238
116	FlpCHO 50% methionine #1 5.18.17	05.18.2017 12:23:11 AM	BF	240457	41	240457	41	0	0	100	21.9512		0	0	0		0	0	0	0	0	0	2838	5	0	60	0	247.917	0.797628	0	16	8.5	151.583	0.822417	0	0	0	0	0	0	0	0	0	0	0	Default	1.0.238
117	FlpCHO 50% methionine #2 5.18.17	05.18.2017 12:23:57 AM	BF	398806	68	392941	67	5865	1	98.5294	19.7206		0	0	0		0	0	0	0	0	0	2857	5	0	60	0	247.917	0.55563	0	16	8.5	151.583	0.764537	0	0	0	0	0	0	0	0	0	0	0	Default	1.0.238
118	FlpCHO 100% methionine #1 5.18.17	05.18.2017 12:26:09 AM	BF	375347	64	369482	63	5865	1	98.4375	20.0938		0	0	0		0	0	0	0	0	0	2844	6	0	60	0	247.917	0.595495	0	16	8.5	151.583	0.794685	0	0	0	0	0	0	0	0	0	0	0	Default	1.0.238
119	FlpCHO 100% methionine #2 5.18.17	05.18.2017 12:26:47 AM	BF	316699	54	316699	54	0	0	100	18.6296		0	0	0		0	0	0	0	0	0	2854	6	0	60	0	247.917	0.673434	0	16	8.5	151.583	0.787503	0	0	0	0	0	0	0	0	0	0	0	Default	1.0.238
