# Supplementary material for: Resurrecting essential amino acid biosynthesis in mammalian cells
Source: eLife journal article supplement (doi:10.7554/elife.72847), 2022-09-27
Supplement: supp [file Figure 1-figure supplement 2-source data 1.xlsx]

## Sheet: Field Meas.
Item	Source	FieldID	BinaryID	ND.T	ND.M	ND.Z	NumberObjects	BinaryAreaFraction	BinaryArea [µm²]		Well	Count Sum		proAB							pro-	0.01	0.05	0.1
1	proAB merged.nd2	1	proab count (DAPI)	1	1	N/A	913	0.037	66174.6					concentration	replicate	sum	average	stdev		proAB	11783.3	13389.3	12053.3	14310.3
2	proAB merged.nd2	2	proab count (DAPI)	2	1	N/A	2938	0.121	216256					pro-	r1	12559	11783.3	1367.04		mchr ctl	198.333	399	3727	12292.3
3	proAB merged.nd2	3	proab count (DAPI)	3	1	N/A	4036	0.166	297740						r2	13666
4	proAB merged.nd2	4	proab count (DAPI)	4	1	N/A	5124	0.211	378585						r3	9125
5	proAB merged.nd2	5	proab count (DAPI)	5	1	N/A	2296	0.093	167372		a1	12559		0.01	r1	14748	13389.3	875.294		stdev	pro-	0.01	0.05	0.1
6	proAB merged.nd2	6	proab count (DAPI)	6	1	N/A	2935	0.12	214487						r2	13666				proAB	1367.04	875.294	824.097	2445.69
7	proAB merged.nd2	7	proab count (DAPI)	7	1	N/A	1033	0.042	75628.6						r3	11754				mchr ctl	65.2619	157.001	1813.97	1062.96
8	proAB merged.nd2	8	proab count (DAPI)	8	1	N/A	2482	0.102	183816					0.05	r1	13534	12053.3	824.097
9	proAB merged.nd2	9	proab count (DAPI)	9	1	N/A	1086	0.044	79497.9						r2	11940
10	proAB merged.nd2	10	proab count (DAPI)	10	1	N/A	3963	0.162	291151		a2	14748			r3	10686
11	proAB merged.nd2	11	proab count (DAPI)	11	1	N/A	1361	0.055	98289.1					0.1	r1	17277	14310.3	2445.69
12	proAB merged.nd2	12	proab count (DAPI)	12	1	N/A	4536	0.185	332842						r2	9459
13	proAB merged.nd2	13	proab count (DAPI)	1	2	N/A	1274	0.051	92128						r3	16195
14	proAB merged.nd2	14	proab count (DAPI)	2	2	N/A	3910	0.161	288555
15	proAB merged.nd2	15	proab count (DAPI)	3	2	N/A	1889	0.077	137812		a3	13534
16	proAB merged.nd2	16	proab count (DAPI)	4	2	N/A	4275	0.175	314141
17	proAB merged.nd2	17	proab count (DAPI)	5	2	N/A	3367	0.138	247092
18	proAB merged.nd2	18	proab count (DAPI)	6	2	N/A	2324	0.095	170893
19	proAB merged.nd2	19	proab count (DAPI)	7	2	N/A	2486	0.101	181548
20	proAB merged.nd2	20	proab count (DAPI)	8	2	N/A	2745	0.113	201974		a4	17277
21	proAB merged.nd2	21	proab count (DAPI)	9	2	N/A	1019	0.041	73574.2
22	proAB merged.nd2	22	proab count (DAPI)	10	2	N/A	2722	0.112	200233
23	proAB merged.nd2	23	proab count (DAPI)	11	2	N/A	2585	0.105	189028
24	proAB merged.nd2	24	proab count (DAPI)	12	2	N/A	3171	0.129	231799
25	proAB merged.nd2	25	proab count (DAPI)	1	3	N/A	3039	0.123	221571		b1	13666
26	proAB merged.nd2	26	proab count (DAPI)	2	3	N/A	2538	0.104	186964
27	proAB merged.nd2	27	proab count (DAPI)	3	3	N/A	2403	0.097	174151
28	proAB merged.nd2	28	proab count (DAPI)	4	3	N/A	2873	0.118	211507
29	proAB merged.nd2	29	proab count (DAPI)	5	3	N/A	2867	0.117	209865
30	proAB merged.nd2	30	proab count (DAPI)	6	3	N/A	4630	0.19	341367		b2	13666
31	proAB merged.nd2	31	proab count (DAPI)	7	3	N/A	4307	0.178	318652
32	proAB merged.nd2	32	proab count (DAPI)	8	3	N/A	1409	0.058	103251
33	proAB merged.nd2	33	proab count (DAPI)	9	3	N/A	3939	0.161	288752
34	proAB merged.nd2	34	proab count (DAPI)	10	3	N/A	2292	0.094	168014
35	proAB merged.nd2	35	proab count (DAPI)	11	3	N/A	4694	0.193	346209		b3	11940
36	proAB merged.nd2	36	proab count (DAPI)	12	3	N/A	3111	0.127	227951
37	proAB merged.nd2	37	proab count (DAPI)	1	4	N/A	2719	0.11	197874
38	proAB merged.nd2	38	proab count (DAPI)	2	4	N/A	2239	0.092	164316
39	proAB merged.nd2	39	proab count (DAPI)	3	4	N/A	1720	0.07	126097
40	proAB merged.nd2	40	proab count (DAPI)	4	4	N/A	2886	0.118	211086		b4	9459
41	proAB merged.nd2	41	proab count (DAPI)	5	4	N/A	884	0.036	64454.3
42	proAB merged.nd2	42	proab count (DAPI)	6	4	N/A	2681	0.11	197814
43	proAB merged.nd2	43	proab count (DAPI)	7	4	N/A	2281	0.092	164298
44	proAB merged.nd2	44	proab count (DAPI)	8	4	N/A	2758	0.113	201931
45	proAB merged.nd2	45	proab count (DAPI)	9	4	N/A	3081	0.127	227523		c1	9125
46	proAB merged.nd2	46	proab count (DAPI)	10	4	N/A	1029	0.042	75248.7
47	proAB merged.nd2	47	proab count (DAPI)	11	4	N/A	2046	0.084	150619
48	proAB merged.nd2	48	proab count (DAPI)	12	4	N/A	1685	0.069	123399
49	proAB merged.nd2	49	proab count (DAPI)	1	5	N/A	4614	0.191	342839
50	proAB merged.nd2	50	proab count (DAPI)	2	5	N/A	3123	0.129	231236		c2	11754
51	proAB merged.nd2	51	proab count (DAPI)	3	5	N/A	3486	0.143	256225
52	proAB merged.nd2	52	proab count (DAPI)	4	5	N/A	2119	0.087	155234
53	proAB merged.nd2	53	proab count (DAPI)	5	5	N/A	45	0.002	3407.6
54	proAB merged.nd2	54	proab count (DAPI)	6	5	N/A	2305	0.094	168377
55	proAB merged.nd2	55	proab count (DAPI)	7	5	N/A	2895	0.118	212385		c3	10686
56	proAB merged.nd2	56	proab count (DAPI)	8	5	N/A	4272	0.176	316294
57	proAB merged.nd2	57	proab count (DAPI)	9	5	N/A	4364	0.179	322001
58	proAB merged.nd2	58	proab count (DAPI)	10	5	N/A	1748	0.071	128079
59	proAB merged.nd2	59	proab count (DAPI)	11	5	N/A	1498	0.06	107916
60	proAB merged.nd2	60	proab count (DAPI)	12	5	N/A	3692	0.152	272122		c4	16195
Feature	Mean	St.Dev	Minimum	Maximum
NumberObjects	2712.37	1136.12	45	5124
BinaryAreaFraction	0.111	0.047	0.002	0.211
BinaryArea [µm²]	199161	84169.3	3407.6	378585
														mchr ctl
Item	Source	FieldID	BinaryID	ND.T	ND.M	ND.Z	NumberObjects	BinaryAreaFraction	BinaryArea [µm²]					concentration	replicate	sum	average	stdev
1	proab mchr ctl.nd2	1	proab mchr ctl count (DAPI)	1	1	N/A	135	0.005	9849.31					pro-	r1	327	198.333	65.2619
2	proab mchr ctl.nd2	2	proab mchr ctl count (DAPI)	2	1	N/A	79	0.003	5661.37						r2	153
3	proab mchr ctl.nd2	3	proab mchr ctl count (DAPI)	3	1	N/A	28	0.001	2047.98						r3	115
4	proab mchr ctl.nd2	4	proab mchr ctl count (DAPI)	4	1	N/A	5940	0.244	437859					0.01	r1	353	399	157.001
5	proab mchr ctl.nd2	5	proab mchr ctl count (DAPI)	5	1	N/A	1788	0.073	130566		a1	327			r2	153
6	proab mchr ctl.nd2	6	proab mchr ctl count (DAPI)	6	1	N/A	1629	0.064	115609						r3	691
7	proab mchr ctl.nd2	7	proab mchr ctl count (DAPI)	7	1	N/A	92	0.004	6737.77					0.05	r1	181	3727	1813.97
8	proab mchr ctl.nd2	8	proab mchr ctl count (DAPI)	8	1	N/A	28	0.001	2028.73						r2	6164
9	proab mchr ctl.nd2	9	proab mchr ctl count (DAPI)	9	1	N/A	7	0.0003	524.08						r3	4836
10	proab mchr ctl.nd2	10	proab mchr ctl count (DAPI)	10	1	N/A	79	0.003	5826.93		a2	353		0.1	r1	14264	12292.3	1062.96
11	proab mchr ctl.nd2	11	proab mchr ctl count (DAPI)	11	1	N/A	961	0.039	69564.3						r2	10618
12	proab mchr ctl.nd2	12	proab mchr ctl count (DAPI)	12	1	N/A	2748	0.112	201407						r3	11995
13	proab mchr ctl.nd2	13	proab mchr ctl count (DAPI)	1	2	N/A	47	0.002	3443.11
14	proab mchr ctl.nd2	14	proab mchr ctl count (DAPI)	2	2	N/A	22	0.001	1495.67
15	proab mchr ctl.nd2	15	proab mchr ctl count (DAPI)	3	2	N/A	26	0.001	1955.15		a3	181
16	proab mchr ctl.nd2	16	proab mchr ctl count (DAPI)	4	2	N/A	3543	0.144	257594
17	proab mchr ctl.nd2	17	proab mchr ctl count (DAPI)	5	2	N/A	2218	0.09	161892
18	proab mchr ctl.nd2	18	proab mchr ctl count (DAPI)	6	2	N/A	1162	0.047	83973.7
19	proab mchr ctl.nd2	19	proab mchr ctl count (DAPI)	7	2	N/A	122	0.005	8895.7
20	proab mchr ctl.nd2	20	proab mchr ctl count (DAPI)	8	2	N/A	44	0.002	3059.35		a4	14264
21	proab mchr ctl.nd2	21	proab mchr ctl count (DAPI)	9	2	N/A	20	0.001	1464.01
22	proab mchr ctl.nd2	22	proab mchr ctl count (DAPI)	10	2	N/A	183	0.008	13474.7
23	proab mchr ctl.nd2	23	proab mchr ctl count (DAPI)	11	2	N/A	866	0.035	62638.2
24	proab mchr ctl.nd2	24	proab mchr ctl count (DAPI)	12	2	N/A	2792	0.114	204880
25	proab mchr ctl.nd2	25	proab mchr ctl count (DAPI)	1	3	N/A	63	0.003	4624.75		b1	153
26	proab mchr ctl.nd2	26	proab mchr ctl count (DAPI)	2	3	N/A	89	0.004	6409.2
27	proab mchr ctl.nd2	27	proab mchr ctl count (DAPI)	3	3	N/A	55	0.002	4115.65
28	proab mchr ctl.nd2	28	proab mchr ctl count (DAPI)	4	3	N/A	2055	0.083	148887
29	proab mchr ctl.nd2	29	proab mchr ctl count (DAPI)	5	3	N/A	3121	0.128	229218
30	proab mchr ctl.nd2	30	proab mchr ctl count (DAPI)	6	3	N/A	1731	0.07	124873		b2	153
31	proab mchr ctl.nd2	31	proab mchr ctl count (DAPI)	7	3	N/A	125	0.005	9104.48
32	proab mchr ctl.nd2	32	proab mchr ctl count (DAPI)	8	3	N/A	15	0.001	1101.64
33	proab mchr ctl.nd2	33	proab mchr ctl count (DAPI)	9	3	N/A	17	0.001	1229.13
34	proab mchr ctl.nd2	34	proab mchr ctl count (DAPI)	10	3	N/A	137	0.006	9963.97
35	proab mchr ctl.nd2	35	proab mchr ctl count (DAPI)	11	3	N/A	1421	0.057	102411		b3	6164
36	proab mchr ctl.nd2	36	proab mchr ctl count (DAPI)	12	3	N/A	2085	0.085	151975
37	proab mchr ctl.nd2	37	proab mchr ctl count (DAPI)	1	4	N/A	0	0	0
38	proab mchr ctl.nd2	38	proab mchr ctl count (DAPI)	2	4	N/A	85	0.003	6203.84
39	proab mchr ctl.nd2	39	proab mchr ctl count (DAPI)	3	4	N/A	19	0.001	1309.13
40	proab mchr ctl.nd2	40	proab mchr ctl count (DAPI)	4	4	N/A	2331	0.093	167159		b4	10618
41	proab mchr ctl.nd2	41	proab mchr ctl count (DAPI)	5	4	N/A	2476	0.1	180320
42	proab mchr ctl.nd2	42	proab mchr ctl count (DAPI)	6	4	N/A	1897	0.076	136835
43	proab mchr ctl.nd2	43	proab mchr ctl count (DAPI)	7	4	N/A	72	0.003	5362.32
44	proab mchr ctl.nd2	44	proab mchr ctl count (DAPI)	8	4	N/A	20	0.001	1363.47
45	proab mchr ctl.nd2	45	proab mchr ctl count (DAPI)	9	4	N/A	71	0.003	5165.52		c1	115
46	proab mchr ctl.nd2	46	proab mchr ctl count (DAPI)	10	4	N/A	211	0.009	15543.2
47	proab mchr ctl.nd2	47	proab mchr ctl count (DAPI)	11	4	N/A	1588	0.064	115058
48	proab mchr ctl.nd2	48	proab mchr ctl count (DAPI)	12	4	N/A	2609	0.105	189193
49	proab mchr ctl.nd2	49	proab mchr ctl count (DAPI)	1	5	N/A	82	0.003	5825.65
50	proab mchr ctl.nd2	50	proab mchr ctl count (DAPI)	2	5	N/A	78	0.003	5604.89		c2	691
51	proab mchr ctl.nd2	51	proab mchr ctl count (DAPI)	3	5	N/A	53	0.002	3911.15
52	proab mchr ctl.nd2	52	proab mchr ctl count (DAPI)	4	5	N/A	395	0.016	28648.2
53	proab mchr ctl.nd2	53	proab mchr ctl count (DAPI)	5	5	N/A	1015	0.041	73466.9
54	proab mchr ctl.nd2	54	proab mchr ctl count (DAPI)	6	5	N/A	1374	0.055	97883.9
55	proab mchr ctl.nd2	55	proab mchr ctl count (DAPI)	7	5	N/A	47	0.002	3345.99		c3	4836
56	proab mchr ctl.nd2	56	proab mchr ctl count (DAPI)	8	5	N/A	46	0.002	3310.06
57	proab mchr ctl.nd2	57	proab mchr ctl count (DAPI)	9	5	N/A	46	0.002	3377.23
58	proab mchr ctl.nd2	58	proab mchr ctl count (DAPI)	10	5	N/A	81	0.003	5847.04
59	proab mchr ctl.nd2	59	proab mchr ctl count (DAPI)	11	5	N/A	380	0.016	28052.7
60	proab mchr ctl.nd2	60	proab mchr ctl count (DAPI)	12	5	N/A	1761	0.071	127677		c4	11995
Feature	Mean	St.Dev	Minimum	Maximum
NumberObjects	870.17	1196.66	0	5940
BinaryAreaFraction	0.035	0.049	0	0.244
BinaryArea [µm²]	63280.4	87467.4	0	437859
StgPosX [µm]	1112	29583.7	-46318.6	46504.1
StgPosY [µm]	-993.3	21397.9	-30850.4	28570
