# Supplementary material for: Resurrecting essential amino acid biosynthesis in mammalian cells
Source: eLife journal article supplement (doi:10.7554/elife.72847), 2022-09-27
Supplement: supp [file Figure 2-figure supplement 3 source data 1.xlsx]

## Sheet: Key
Sample key
dFBS (diluted 1:20 in extraction buffer)	Replicate 1	S14734
	Replicate 2	S14735
	Replicate 3	S14736
Internal standards spiked in at 0.475uM
Metabolite concentration [uM] = Metabolite Intensity / Internal Standard intensity * 0.475 [uM] * 20

## Sheet: Metabolite Panel
	Metabolite	Formula	Ion Type	mz	ppm	RT	RT_range	Detection	Skeleton_Metabolite	S14734	S14735	S14736
0	1 1-Methylnicotinamide	C7H8N2O	[M+H]+	137.071	1.2	20.12	0.46	0	1-Methylnicotinamide	-	-	-
1	2 2,3-Diphosphoglyceric acid	C3H8O10P2	[M-H]-	264.952	-6.4	14.63	0.23	0	2,3-Diphosphoglyceric acid	-	-	-
2	3 3-Hydroxybutyric acid	C4H8O3	[M-H]-	103.04	-11.3	6.33	0.35	0	3-Hydroxybutyric acid	-	-	-
3	4 3-Phosphoglyceric acid	C3H7O7P	[M-H]-	184.986	-4.1	14.02	0.32	1	3-Phosphoglyceric acid	-	-	-
4	5 4,5-Dihydroorotic acid	C5H6N2O4	[M-H]-	157.025	-7.5	8.84	0.44	0	4,5-Dihydroorotic acid	-	-	-
5	6 4-Hydroxyproline	C5H9NO3	[M+H]+	132.065	2.9	10.95	0.17	6	4-Hydroxyproline	14000000	13300000	11600000
6	7 5'-Methylthioadenosine	C11H15N5O3S	[M+H]+	298.097	-2.1	4.23	0.34	0	5'-Methylthioadenosine	-	-	-
7	8 5-Phosphoribosylamine	C5H12NO7P	[M-H]-	228.028	-9.1	13.33	0	1	5-Phosphoribosylamine	-	-	-
8	9 6-Phosphogluconic acid	C6H13O10P	[M-H]-	275.017	0.1	15.05	0	0	6-Phosphogluconic acid	-	-	-
9	10 Acetoacetic acid	C4H6O3	[M-H]-	101.024	-11.1	10.1	0.38	5	Acetoacetic acid	187000	145000	-
10	11 Acetyl-CoA	C23H38N7O17P3S	[M+H]+	810.133	10.4	9.44	0.46	1	Acetyl-CoA	-	-	-
11	12 Acetylcysteine	C5H9NO3S	[M+H]+	164.038	1.9	6.21	0.22	0	Acetylcysteine	-	-	-
12	13 Adenine	C5H5N5	[M+H]+	136.062	0.2	6.41	0.41	0	Adenine	-	-	-
13	14 Adenosine	C10H13N5O4	[M+H]+	268.104	-1.6	6.1	0.47	0	Adenosine	-	-	-
14	15 Adenosine diphosphate ribose	C15H23N5O14P2	[M-H]-	558.064	-0.7	11.7	0.21	0	Adenosine diphosphate ribose	-	-	-
15	16 Adenosine monophosphate	C10H14N5O7P	[M+H]+	348.07	-1.3	10.81	0.45	0	Adenosine monophosphate	-	-	-
16	17 Adenosine triphosphate	C10H16N5O13P3	[M-H]-	505.988	2.2	14.15	0.2	0	Adenosine triphosphate	-	-	-
17	18 Adenylsuccinic acid	C14H18N5O11P	[M-H]-	462.067	0	0	0	0	Adenylsuccinic acid	-	-	-
18	19 ADP	C10H15N5O10P2	[M-H]-	426.022	1.8	12.23	0.24	0	ADP	-	-	-
19	20 Allantoin	C4H6N4O3	[M-H]-	157.037	-5.8	10.61	0.3	6	Allantoin	1330000	952000	748000
20	21 Aminoadipic acid	C6H11NO4	[M-H]-	160.061	-5.8	7.3	0.32	3	Aminoadipic acid	-	-	-
21	22 Argininosuccinic acid	C10H18N4O6	[M-H]-	289.115	-0.2	13.67	0.16	1	Argininosuccinic acid	-	-	-
22	23 Beta-Alanine	C3H7NO2	[M+H]+	90.055	7.2	10.42	0.11	1	Beta-Alanine	163000	-	-
23	24 Betaine	C5H11NO2	[M+H]+	118.086	2.1	7.96	0.22	6	Betaine	33100000	27500000	19200000
24	25 Butyrylcarnitine	C11H21NO4	[M+H]+	232.154	-0.6	5.68	0.49	5	Butyrylcarnitine	414000	341000	-
25	26 Carbamoyl phosphate	CH4NO5P	[M-H]-	139.975	-6	27.3	0.48	0	Carbamoyl phosphate	-	-	-
26	27 Carnosine	C9H14N4O3	[M+H]+	227.114	-1.2	11.76	0.2	6	Carnosine	1200000	688000	660000
27	28 CDP	C9H15N3O11P2	[M+H]+	404.026	0.1	14.23	0.25	0	CDP	-	-	-
28	29 Choline	C5H14NO	[Cat]+	104.107	3	12.27	0.49	6	Choline	86000000	61300000	26500000
29	30 cis-Aconitic acid	C6H6O6	[M-H]-	173.009	-5	15.08	0.3	3	cis-Aconitic acid	-	-	-
30	31 Citric acid	C6H8O7	[M-H]-	191.02	-4.3	15.19	0.38	3	Citric acid	-	-	-
31	32 Citrulline	C6H13N3O3	[M+H]+	176.103	-1	12.11	0.12	6	Citrulline	2020000	1510000	1270000
32	33 Creatine	C4H9N3O2	[M+H]+	132.077	-1.9	10.88	0.15	5	Creatine	20000000	18300000	15300000
33	34 Creatinine	C4H7N3O	[M+H]+	114.066	1.9	6.56	0.3	5	Creatinine	40600000	35400000	28000000
34	35 Cyclic AMP	C10H12N5O6P	[M-H]-	328.045	15.1	5.98	0	0	Cyclic AMP	-	-	-
35	36 Cytidine	C9H13N3O5	[M+H]+	244.093	-0.8	8.48	0.19	6	Cytidine	732000	611000	471000
36	37 Cytidine monophosphate	C9H14N3O8P	[M+H]+	324.059	-2.6	12.87	0.29	0	Cytidine monophosphate	-	-	-
37	38 Cytidine triphosphate	C9H16N3O14P3	[M-H]-	481.977	-4.4	16.52	0.16	0	Cytidine triphosphate	-	-	-
38	39 Cytosine	C4H5N3O	[M+H]+	112.05	5.9	9.99	0.46	0	Cytosine	-	-	-
39	40 D-2-Hydroxyglutaric acid	C5H8O5	[M-H]-	147.03	-6.8	12.4	0.17	4	D-2-Hydroxyglutaric acid	592000	-	-
40	41 D-Glucose	C6H12O6	[M-H]-	179.056	-4.5	10.08	0.25	6	D-Glucose	364000	342000	249000
41	42 D-Glyceraldehyde 3-phosphate	C3H7O6P	[M-H]-	168.991	-5.6	13.21	0.1	2	D-Glyceraldehyde 3-phosphate	-	-	-
42	43 Dihydrofolic acid	C19H21N7O6	[M+H]+	444.163	10.6	13.03	0	0	Dihydrofolic acid	-	-	-
43	44 Dihydroxyacetone phosphate	C3H7O6P	[M-H]-	168.991	-5.6	13	0.12	1	Dihydroxyacetone phosphate	-	-	-
44	45 D-Ribose 5-phosphate	C5H11O8P	[M-H]-	229.012	-2.1	12.69	0.29	2	D-Ribose 5-phosphate	-	-	-
45	46 D-Sedoheptulose 7-phosphate	C7H15O10P	[M-H]-	289.033	0.3	13.23	0.28	0	D-Sedoheptulose 7-phosphate	-	-	-
46	47 dTDP	C10H16N2O11P2	[M-H]-	401.016	-2.4	12.56	0	0	dTDP	-	-	-
47	48 FAD	C27H33N9O15P2	[M+H]+	786.164	5.2	9.04	0.33	1	FAD	-	-	-
48	49 Folic acid	C19H19N7O6	[M+H]+	442.147	5.5	15.45	0.14	0	Folic acid	-	-	-
49	50 Fructose 1,6-bisphosphate	C6H14O12P2	[M-H]-	338.989	0.1	15.92	0.26	0	Fructose 1,6-bisphosphate	-	-	-
50	51 Fructose 6-phosphate	C6H13O9P	[M-H]-	259.022	-0.6	12.69	0.25	3	Fructose 6-phosphate	-	-	-
51	52 Fumaric acid	C4H4O4	[M-H]-	115.004	-10.3	13.14	0.26	3	Fumaric acid	-	-	-
52	53 Glucose 6-phosphate	C6H13O9P	[M-H]-	259.022	-1	13.8	0.29	3	Glucose 6-phosphate	-	-	-
53	54 Glutathione	C10H17N3O6S	[M+H]+	308.091	-1.6	11.57	0.23	0	Glutathione	-	-	-
54	55 Glycerol 3-phosphate	C3H9O6P	[M-H]-	171.006	-5.9	12.02	0.16	3	Glycerol 3-phosphate	-	-	-
55	56 Glycine	C2H5NO2	[M+H]+	76.0393	9.1	11.94	0.15	6	Glycine	1890000	1770000	1100000
56	57 Guanidoacetic acid	C3H7N3O2	[M+H]+	118.061	3.4	11.9	0.16	0	Guanidoacetic acid	-	-	-
57	58 Guanine	C5H5N5O	[M+H]+	152.057	-0.6	8.79	0.38	0	Guanine	-	-	-
58	59 Guanosine	C10H13N5O5	[M+H]+	284.099	-3.3	9.15	0.28	0	Guanosine	-	-	-
59	60 Guanosine diphosphate	C10H15N5O11P2	[M-H]-	442.017	2.1	14.99	0.24	0	Guanosine diphosphate	-	-	-
60	61 Guanosine monophosphate	C10H14N5O8P	[M+H]+	364.065	-1.6	13.71	0.33	0	Guanosine monophosphate	-	-	-
61	62 Guanosine triphosphate	C10H16N5O14P3	[M-H]-	521.983	0	0	0	0	Guanosine triphosphate	-	-	-
62	63 Homocysteine	C4H9NO2S	[M-H]-	134.028	-7.6	8.67	0.08	0	Homocysteine	-	-	-
63	64 Hypotaurine	C2H7NO2S	[M+H]+	110.027	2.5	11.3	0.16	0	Hypotaurine	-	-	-
64	65 Hypoxanthine	C5H4N4O	[M+H]+	137.046	0.8	7.08	0.38	3	Hypoxanthine	-	-	-
65	66 Inosine	C10H12N4O5	[M+H]+	269.088	-1.7	7.76	0.22	2	Inosine	19600	-	-
66	67 Inosinic acid	C10H13N4O8P	[M+H]+	349.054	11.8	12.57	0.35	0	Inosinic acid	-	-	-
67	68 L-Acetylcarnitine	C9H17NO4	[M+H]+	204.123	-1.2	7.67	0.36	5	L-Acetylcarnitine	680000	619000	-
68	69 L-Alanine	C3H7NO2	[M+H]+	90.055	6	11.12	0.2	5	L-Alanine	9020000	8280000	6370000
69	70 L-Arginine	C6H14N4O2	[M+H]+	175.119	-0.9	19.05	0.3	0	L-Arginine	-	-	-
70	71 L-Asparagine	C4H8N2O3	[M+H]+	133.061	1	11.69	0.21	6	L-Asparagine	394000	284000	160000
71	72 L-Aspartic acid	C4H7NO4	[M-H]-	132.03	-8.6	12.02	0.15	6	L-Aspartic acid	4260000	3430000	2300000
72	73 L-Carnitine	C7H16NO3	[Cat]+	162.113	-0.4	9.72	0.2	6	L-Carnitine	5000000	4150000	2950000
73	74 L-Cystathionine	C7H14N2O4S	[M+H]+	223.075	-1.8	13.56	0.26	3	L-Cystathionine	-	-	-
74	75 L-Cysteine	C3H7NO2S	[M+H]+	122.027	2.2	13.12	0.36	0	L-Cysteine	-	-	-
75	76 L-Cystine	C6H12N2O4S2	[M-H]-	239.017	-1.2	12.99	0.2	2	L-Cystine	234000	-	-
76	77 L-Glutamic acid	C5H9NO4	[M+H]+	148.06	-0.9	11.76	0.17	6	L-Glutamic acid	19900000	18400000	12200000
77	78 L-Glutamine	C5H10N2O3	[M+H]+	147.076	-0.8	11.39	0.18	6	L-Glutamine	7510000	6920000	5200000
78	79 L-Histidine	C6H9N3O2	[M+H]+	156.077	-1	11.14	0.31	2	L-Histidine	14500000	16500000	-
79	80 L-Isoleucine	C6H13NO2	[M+H]+	132.102	0	7.44	0.13	5	L-Isoleucine	27900000	14300000	5540000
80	81 L-Kynurenine	C10H12N2O3	[M+H]+	209.092	-0.8	7.39	0.27	6	L-Kynurenine	4240000	3320000	2380000
81	82 L-Lactic acid	C3H6O3	[M-H]-	89.0244	-12.6	7.54	0.22	4	L-Lactic acid	6900000	6150000	-
82	83 L-Leucine	C6H13NO2	[M+H]+	132.102	0	7.46	0.24	6	L-Leucine	29800000	25100000	19300000
83	84 L-Lysine	C6H14N2O2	[M+H]+	147.113	-0.7	18.05	0.27	3	L-Lysine	1550000	-	-
84	85 L-Malic acid	C4H6O5	[M-H]-	133.014	-9.4	13.14	0.13	4	L-Malic acid	2030000	-	-
85	86 L-Methionine	C5H11NO2S	[M+H]+	150.058	-0.2	8.17	0.19	6	L-Methionine	2790000	2720000	1490000
86	87 L-Phenylalanine	C9H11NO2	[M+H]+	166.086	-0.9	6.95	0.36	6	L-Phenylalanine	23500000	19500000	13500000
87	88 L-Proline	C5H9NO2	[M+H]+	116.071	1.7	9.26	0.16	6	L-Proline	174000000	153000000	112000000
88	89 L-Serine	C3H7NO3	[M+H]+	106.05	3.1	12.08	0.17	6	L-Serine	3060000	2410000	1600000
89	90 L-Threonine	C4H9NO3	[M-H]-	118.051	-9	11.05	0.24	6	L-Threonine	1260000	1260000	859000
90	91 L-Tryptophan	C11H12N2O2	[M+H]+	205.097	-1.2	8.17	0.29	6	L-Tryptophan	17000000	14000000	9740000
91	92 L-Tyrosine	C9H11NO3	[M+H]+	182.081	-0.4	9.55	0.19	6	L-Tyrosine	6060000	5140000	3490000
92	93 L-Valine	C5H11NO2	[M+H]+	118.086	2.1	9.06	0.13	6	L-Valine	13500000	11400000	8870000
93	94 N6-Acetyl-L-lysine	C8H16N2O3	[M+H]+	189.123	-7.2	3.07	0.29	1	N6-Acetyl-L-lysine	-	3390000	-
94	95 N-Acetylglutamic acid	C7H11NO5	[M+H]+	190.071	-1.6	11.39	0.38	2	N-Acetylglutamic acid	-	-	-
95	96 N-Acetylglutamine	C7H12N2O4	[M-H]-	187.072	-6	6.94	0.26	1	N-Acetylglutamine	-	13900	-
96	97 N-Acetyl-L-alanine	C5H9NO3	[M+H]+	132.065	-0.2	6.95	0.16	1	N-Acetyl-L-alanine	-	-	-
97	98 N-Acetyl-L-methionine	C7H13NO3S	[M+H]+	192.069	-1.5	4.47	0.24	5	N-Acetyl-L-methionine	12900	12900	-
98	99 N-Acetyl-L-phenylalanine	C11H13NO3	[M+H]+	208.097	-0.6	3.35	0.28	0	N-Acetyl-L-phenylalanine	-	-	-
99	100 N-Acetylornithine	C7H14N2O3	[M+H]+	175.108	-0.1	9.95	0.2	6	N-Acetylornithine	869000	723000	541000
100	101 N-Acetylserine	C5H9NO4	[M-H]-	146.046	-6.7	8.49	0.21	5	N-Acetylserine	106000	102000	-
101	102 NAD	C21H28N7O14P2	[Cat]+	664.116	7.5	10.9	0.27	0	NAD	-	-	-
102	103 NADH	C21H29N7O14P2	[M-H]-	664.117	5.7	10.48	0	0	NADH	-	-	-
103	104 NADP	C21H29N7O17P3	[Cat]+	744.083	-8	14.16	0.38	0	NADP	-	-	-
104	105 NADPH	C21H30N7O17P3	[M-H]-	744.084	0	0	0	0	NADPH	-	-	-
105	106 Niacinamide	C6H6N2O	[M+H]+	123.055	1.7	4.56	0.25	0	Niacinamide	-	-	-
106	107 Nicotinic acid	C6H5NO2	[M-H]-	122.025	-8.6	5.87	0.36	0	Nicotinic acid	-	-	-
107	108 O-Phosphoethanolamine	C2H8NO4P	[M+H]+	142.026	0.9	12.73	0.2	0	O-Phosphoethanolamine	-	-	-
108	109 Ornithine	C5H12N2O2	[M+H]+	133.097	0.3	17.01	0.05	0	Ornithine	-	-	-
109	110 Orotic acid	C5H4N2O4	[M-H]-	155.01	-6	7.95	0.35	0	Orotic acid	-	-	-
110	111 Orotidylic acid	C10H13N2O11P	[M+H]+	369.033	-10	7.46	0.12	0	Orotidylic acid	-	-	-
111	112 Oxidized glutathione	C20H32N6O12S2	[M+H]+	613.159	-0.4	14.6	0.3	0	Oxidized glutathione	-	-	-
112	113 Oxoadipic acid	C6H8O5	[M-H]-	159.03	-6.3	7.54	0.25	0	Oxoadipic acid	-	-	-
113	114 Oxoglutaric acid	C5H6O5	[M-H]-	145.014	-6.5	12.83	0.23	2	Oxoglutaric acid	-	-	-
114	115 Palmitic acid	C16H32O2	[M-H]-	255.233	-1	2.75	0.22	0	Palmitic acid	-	-	-
115	116 Pantothenic acid	C9H17NO5	[M+H]+	220.118	-1.6	6.48	0.39	3	Pantothenic acid	-	-	-
116	117 Phenol	C6H6O	[M-H]-	93.0346	-12.8	3.31	0.26	0	Phenol	-	-	-
117	118 Phosphocreatine	C4H10N3O5P	[M-H]-	210.029	-3.5	12.22	0.03	0	Phosphocreatine	-	-	-
118	119 Phosphoenolpyruvic acid	C3H5O6P	[M-H]-	166.975	-4.8	13.93	0.31	0	Phosphoenolpyruvic acid	-	-	-
119	120 Phosphoribosyl pyrophosphate	C5H13O14P3	[M-H]-	388.945	-5	16.94	0.29	0	Phosphoribosyl pyrophosphate	-	-	-
120	121 Phosphorylcholine	C5H14NO4P	[M+H]+	184.073	-1.2	11.83	0.22	3	Phosphorylcholine	-	-	-
121	122 Phosphoserine	C3H8NO6P	[M+H]+	186.016	0	11.83	0.27	4	Phosphoserine	22200	18500	-
122	123 Pipecolic acid	C6H11NO2	[M+H]+	130.086	1.1	7.81	0.27	6	Pipecolic acid	277000	240000	194000
123	124 Propionylcarnitine	C10H19NO4	[M+H]+	218.139	-0.9	6.57	0.33	6	Propionylcarnitine	583000	527000	425000
124	125 Pyruvic acid	C3H4O3	[M-H]-	87.0088	-13.4	7.24	0.3	0	Pyruvic acid	-	-	-
125	126 Ribose 1-phosphate	C5H11O8P	[M-H]-	229.012	-0.8	12.1	0.22	0	Ribose 1-phosphate	-	-	-
126	127 Saccharopine	C11H20N2O6	[M-H]-	275.125	5.6	13.31	0	1	Saccharopine	-	-	-
127	128 S-Adenosylhomocysteine	C14H20N6O5S	[M-H]-	383.114	8.1	10.39	0.26	0	S-Adenosylhomocysteine	-	-	-
128	129 S-Adenosylmethionine	C15H22N6O5S	[M+H]+	399.144	-1	12.07	0.28	0	S-Adenosylmethionine	-	-	-
129	130 Sarcosine	C3H7NO2	[M+H]+	90.055	6	11.21	0.15	6	Sarcosine	6020000	6960000	4530000
130	131 Succinic acid	C4H6O4	[M-H]-	117.019	-9.7	12.36	0.16	6	Succinic acid	1730000	1410000	965000
131	132 Taurine	C2H7NO3S	[M-H]-	124.007	-8.8	11.66	0.19	5	Taurine	468000	439000	360000
132	133 Thymidine	C10H14N2O5	[M-H]-	241.083	-1.2	4.6	0.33	4	Thymidine	33000	-	-
133	134 Uracil	C4H4N2O2	[M+H]+	113.035	3.9	6.77	0.3	3	Uracil	33600	-	-
134	135 Ureidopropionic acid	C4H8N2O3	[M-H]-	131.046	-7.8	11.66	0.15	5	Ureidopropionic acid	194000	180000	131000
135	136 Ureidosuccinic acid	C5H8N2O5	[M-H]-	175.036	-3.7	13.31	0.24	1	Ureidosuccinic acid	-	-	-
136	137 Uric acid	C5H4N4O3	[M+H]+	169.036	-2.5	9.12	0.23	0	Uric acid	-	-	-
137	138 Uridine	C9H12N2O6	[M-H]-	243.062	-1.1	6.83	0.37	6	Uridine	138000	131000	115000
138	139 Uridine 5'-diphosphate	C9H14N2O12P2	[M+H]+	405.01	-1.7	13.73	0.16	0	Uridine 5'-diphosphate	-	-	-
139	140 Uridine 5'-monophosphate	C9H13N2O9P	[M-H]-	323.029	0.3	12.26	0.45	0	Uridine 5'-monophosphate	-	-	-
140	141 Uridine diphosphate glucose	C15H24N2O17P2	[M-H]-	565.048	0	0	0	0	Uridine diphosphate glucose	-	-	-
141	142 Uridine diphosphate-N-acetylglucosamine	C17H27N3O17P2	[M+H]+	608.089	-0.3	12.14	0.43	0	Uridine diphosphate-N-acetylglucosamine	-	-	-
142	143 Uridine triphosphate	C9H15N2O15P3	[M-H]-	482.961	-1.2	16.2	0.15	0	Uridine triphosphate	-	-	-
143	144 Valerylcarnitine	C12H23NO4	[M+H]+	246.17	-0.8	5.08	0.44	5	Valerylcarnitine	113000	88400	-
144	145 Xanthine	C5H4N4O2	[M-H]-	151.026	-6.3	8.78	0.25	3	Xanthine	-	-	-
145	146 Xanthosine	C10H12N4O6	[M-H]-	283.068	0	8.02	0.26	3	Xanthosine	-	-	-
146	147 Xanthylic acid	C10H13N4O9P	[M-H]-	363.035	0	0	0	0	Xanthylic acid	-	-	-

## Sheet: Internal Standards
	Metabolite	Ion Type	Theoretical m/z	obs_mz	ppm	RT_min	RT_range	S14734	S14735	S14736	S14737	S14738	S14739	All Samples CV (%)
	Isoleucine-13C,15N-6,1	[M+H]+	139.119	139.119	-0.5	7.39	0.06	14754690	7709786	2756308	455995	8836537	17873898	76.848
	Leucine-13C,15N-6,1	[M+H]+	139.119	139.119	-0.5	7.83	0.26	23024482	21213122	15864490	13313229	25510892	27000262	25.7429
	Alanine-13C,15N-3,1	[M+H]+	94.0621	94.0626	5.8	11.02	0.2	3575278	3644629	2587063	2969420	3082438	2193468	18.6528
	Arginine-13C,15N-6,4	[M+H]+	185.127	185.127	-1.2	18.83	0.33	8250394	7160920	6458488	5120169	6095364	6680460	15.8318
	Glycine-13C,15N-2,1	[M+H]+	79.043	79.0437	8.2	11.87	0.19	628892	632628	387978	365606	748337	877667	33.0076
	Histidine-13C,15N-6,3	[M+H]+	165.088	165.088	-1.1	10.89	0.33	16724686	19349640	14909402	16045135	13152537	11730978	17.6338
	Lysine-13C,15N-6,2	[M+H]+	155.127	155.127	-1.3	18.02	0.27	1483246	1150277	954088	855735	1604036	2187148	36.0072
	Methionine-13C,15N-5,1	[M+H]+	156.072	156.072	-0.9	8.13	0.19	16368647	17308658	9050111	12398787	23221728	25977014	36.6696
	Phenylalanine-13C,15N-9,1	[M+H]+	176.113	176.113	-1	6.85	0.29	31227932	26941126	19520022	18883734	34160460	38297484	27.9666
	Proline-13C,15N-5,1	[M+H]+	122.084	122.084	-0.1	9.21	0.2	71727336	67523712	48158796	48782156	84861264	91384408	26.064
	Serine-13C,15N-3,1	[M+H]+	110.057	110.057	3	12.04	0.14	2039187	1580935	1110470	1015506	2295983	2429705	34.5748
	Threonine-13C,15N-4,1	[M+H]+	125.076	125.076	1	10.89	0.24	5397762	5390608	4321806	4112554	5009318	4547350	11.4759
	Tyrosine-13C,15N-9,1	[M+H]+	192.108	192.108	-1	9.46	0.19	13143438	12039306	8050322	7582089	15334019	16508478	30.4081
	Valine-13C,15N-5,1	[M+H]+	124.1	124.1	0.3	9.01	0.18	13302069	12090287	9426942	7961040	15230813	15774295	25.4015
	Aspartate-13C,15N-4,1	[M-H]-	137.041	137.04	-7.9	11.95	0.14	4154524	3612945	2463612	1937747	4909392	5568670	37.0337
	Glutamate-13C,15N-5,1	[M-H]-	152.06	152.059	-6.5	11.72	0.13	3909618	3558262	2556732	1978762	4221332	4419276	28.2367
	Median				-0.7		0.195							28.1017
	Metabolite name indicates the chemical standard used, and the type of isotope labeling. Obs_mz is the empicially observed m/z of the standard compound. Ppm is the relative error between the observed and theoretical m/z of the standard in parts-per-million. RT is the retention time of the standard. RT_Range is the maximum distance between the earliest and latest eluting standards across all QC sam…

## Sheet: Calculated concentration
Concentrations [uM]	S14734	S14735	S14736			F-12K formulation [uM]	RPMI formulation [uM]
L-Alanine	23.9782	21.5917	23.3922			202.25	133.333
L-Aspartic acid	9.74414	9.02135	8.87564			200	150.38
L-Glutamic acid	48.3811	49.0826	45.3642			197.28	136.05
L-Histidine	8.20916	8.08181	#VALUE!			218.1	96.7742
L-Isoleucine	17.9854	17.6483	19.1082			60.15	381.679
L-Leucine	12.3047	11.2208	11.5558			200	381.679
L-Lysine	9.93701	#VALUE!	#VALUE!			398.9	218.579
L-Methionine	1.6168	1.4905	1.56208			60.13	100.671
L-Phenylalanine	7.15128	6.87559	6.56314			60.12	90.9091
L-Proline	23.019	21.4861	22.1185			600	173.913
L-Serine	14.2396	14.4535	13.7047			200	285.714
L-Threonine	2.22531	2.21244	1.88714			193.28	168.067
L-Tyrosine	4.38177	4.05652	4.12421			51.52	110.497
L-Valine	9.61594	8.98918	8.93904			196.58	170.94
Glycine	28.4916	26.608	27.0249			200	133.33
