# Supplementary material for: Resurrecting essential amino acid biosynthesis in mammalian cells
Source: eLife journal article supplement (doi:10.7554/elife.72847), 2022-09-27
Supplement: supp [file Figure 2-figure supplement 4-source data 1.xlsx]

## Sheet: B
PrestoBlue assay, day 7		pCtrl			pMTIV			pSceMTIV			No cell control
		1	2	3	4	5	6	7	8	9	10	11	12
Methionine-free medium		13064	13505	13726	13566	14090	13901	13301	13402	13521	13475	13433	13546	Read 2:560,590
Threonine-free medium		13238	12961	12769	13436	13943	14033	14525	14029	14008	14344	15009	13908	Read 2:560,590
Isoleucine-free medium		12806	12764	12953	12881	13045	13028	13215	13089	13309	12743	13272	12979	Read 2:560,590
Isoleucine-free medium + substrate spiked in		14556	14416	14611	14537	14364	14295	14104	14193	14042	14865	13788	12003	Read 2:560,590
Complete medium		16484	28569	28345	20516	17085	17938	31466	35265	24650	14039	13302	13401	Read 2:560,590
Complete medium + substrate spiked in		14522	14381	14604	15591	15580	16080	15454	15618	15409	14899	14879	14951	Read 2:560,590
