# Supplementary material for: Resurrecting essential amino acid biosynthesis in mammalian cells
Source: eLife journal article supplement (doi:10.7554/elife.72847), 2022-09-27
Supplement: supp [file Figure 2-figure supplement 5-source data 1.xlsx]

## Sheet: A
Plated 250k cells per well in 6 well plates on 1/18/22
Counted 3 pCtrl and 3 pMTIV wells on 1/19/22. Switched remaining wells to 50% pMTIV-cVfM.
Line	Replicate	Medium	Count	Actual cell number
pCtrl	1	Complete (day 0)	82330	823300
pCtrl	2	Complete (day 0)	84160	841600
pCtrl	3	Complete (day 0)	73000	730000
pMTIV	1	Complete (day 0)	66580	665800
pMTIV	2	Complete (day 0)	72940	729400
pMTIV	3	Complete (day 0)	63200	632000
Counted remaining pMTIV wells on 1/23/22.
Line	Replicate	Medium	Count	Actual cell number	Replated
pMTIV	1	50% pMTIV-cVfM (day 4)	195100	975500	487750
pMTIV	2	50% pMTIV-cVfM (day 4)	198900	994500	497250
pMTIV	3	50% pMTIV-cVfM (day 4)	201000	1.005e+06	502500
Counted replated pMTIV and remaining pCtrl wells on 1/27/22.
Line	Replicate	Medium	Count	Actual cell number	Cumulative cell number
pCtrl	1	50% pMTIV-cVfM (day 8)	269300	67325
pCtrl	2	50% pMTIV-cVfM (day 8)	268100	67025
pCtrl	3	50% pMTIV-cVfM (day 8)	209100	52275
pMTIV	1	50% pMTIV-cVfM (day 8)	33950	679000	1358000
pMTIV	2	50% pMTIV-cVfM (day 8)	32530	650600	1301200
pMTIV	3	50% pMTIV-cVfM (day 8)	33910	678200	1356400

## Sheet: B
Cell counts on day 5 in each conditioned medium condition
	Cell count
pCtrl cells (50% pCtrl cVfM) 1	114200
pCtrl cells (50% pCtrl cVfM) 2	116500
pCtrl cells (50% pCtrl cVfM) 3	99510
pMTIV cells (50% pCtrl cVfM) 1	199500
pMTIV cells (50% pCtrl cVfM) 2	192400
pMTIV cells (50% pCtrl cVfM) 3	149600
pCtrl cells (50% pMTIV cVfM) 1	122500
pCtrl cells (50% pMTIV cVfM) 2	167700
pCtrl cells (50% pMTIV cVfM) 3	133400
pMTIV cells (50% pMTIV cVfM) 1	281500
pMTIV cells (50% pMTIV cVfM) 2	268100
pMTIV cells (50% pMTIV cVfM) 3	260500
