# Supplementary material for: Resurrecting essential amino acid biosynthesis in mammalian cells
Source: eLife journal article supplement (doi:10.7554/elife.72847), 2022-09-27
Supplement: supp [file Figure 2-source data 1.xlsx]

## Sheet: D
Plated 30k cells per 24well (12 wells for each pCtrl, pMTIV, pIV) on 1/25/21 in complete F-12K medium
Counted 3 wells for each cell line on 1/26/21. Resuspended in 1000ul before counting.
Line	Replicate	Medium	Count (cells / ml)	Actual cell number
pCtrl	1	Complete	35850	35850
pCtrl	2	Complete	31740	31740
pCtrl	3	Complete	42920	42920
pMTIV	1	Complete	58505	58505
pMTIV	2	Complete	56840	56840
pMTIV	3	Complete	54640	54640
pIV	1	Complete	55340	55340
pIV	2	Complete	45460	45460
pIV	3	Complete	57190	57190
Counted 3 wells for each cell line on 1/27/21. Resuspended in 1000ul before counting. Rest of wells were switched to fresh complete medium.
Line	Replicate	Medium	Count (cells / ml)	Actual cell number
pCtrl	1	Complete	198800	198800
pCtrl	2	Complete	180700	180700
pCtrl	3	Complete	210400	210400
pMTIV	1	Complete	171700	171700
pMTIV	2	Complete	183300	183300
pMTIV	3	Complete	174900	174900
pIV	1	Complete	209500	209500
pIV	2	Complete	213900	213900
pIV	3	Complete	201400	201400
Counted 3 wells for each cell line on 1/28/21. Resuspended in 1000ul before counting.
Line	Replicate	Medium	Count (cells / ml)	Actual cell number
pCtrl	1	Complete	366800	366800
pCtrl	2	Complete	372400	372400
pCtrl	3	Complete	406200	406200
pMTIV	1	Complete	362700	362700
pMTIV	2	Complete	401300	401300
pMTIV	3	Complete	395600	395600
pIV	1	Complete	287000	287000
pIV	2	Complete	376700	376700
pIV	3	Complete	399900	399900

## Sheet: E
Seeded 100k cells pCtrl, pMTIV, pIV cells into 24well plates straight into Valine-free Medium on 4/12/21
Counted 3 wells for each cell line on 4/14/21, 5pm. Resuspended in 500ul. Rest of wells were switched to fresh Valine-free medium
Line	Replicate	Medium	Count (cells / ml)	Actual cell number
pCtrl	1	Valine-free medium (day2)	129100	64550
pCtrl	2	Valine-free medium (day2)	150500	75250
pCtrl	3	Valine-free medium (day2)	128100	64050
pMTIV	1	Valine-free medium (day2)	199000	99500
pMTIV	2	Valine-free medium (day2)	228500	114250
pMTIV	3	Valine-free medium (day2)	191200	95600
pIV	1	Valine-free medium (day2)	261000	130500
pIV	2	Valine-free medium (day2)	288000	144000
pIV	3	Valine-free medium (day2)	294200	147100
Counted 3 wells for each cell line on 4/16/21, 5pm. Resuspended in 500ul. Rest of wells were switched to fresh Valine-free medium
Line	Replicate	Medium	Count (cells / ml)	Actual cell number
pCtrl	1	Valine-free medium (day4)	26930	13465
pCtrl	2	Valine-free medium (day4)	37640	18820
pCtrl	3	Valine-free medium (day4)	84970	42485
pMTIV	1	Valine-free medium (day4)	220100	110050
pMTIV	2	Valine-free medium (day4)	193900	96950
pMTIV	3	Valine-free medium (day4)	161800	80900
pIV	1	Valine-free medium (day4)	232000	116000
pIV	2	Valine-free medium (day4)	239600	119800
pIV	3	Valine-free medium (day4)	249400	124700
Counted 3 wells for each cell line on 4/18/21, 6pm. Resuspended in 500ul. Rest of wells were switched to fresh Valine-free medium
Line	Replicate	Medium	Count (cells / ml)	Actual cell number
pCtrl	1	Valine-free medium (day6)	28170	14085
pCtrl	2	Valine-free medium (day6)	27050	13525
pCtrl	3	Valine-free medium (day6)	15410	7705
pMTIV	1	Valine-free medium (day6)	271200	135600
pMTIV	2	Valine-free medium (day6)	281500	140750
pMTIV	3	Valine-free medium (day6)	264000	132000
pIV	1	Valine-free medium (day6)	241800	120900
pIV	2	Valine-free medium (day6)	251300	125650
pIV	3	Valine-free medium (day6)	254700	127350

## Sheet: F
Seeded 100k cells per 6well into complete F-12Kon 4/15/21. Switched medium to Valine-free Medium on 4/16/21
Counted cells on 4/18/21 and plated 1/4 in new wells. Counted 250ul suspended in 1ml total pbs
Line	Replicate	Medium	Count (cells / ml)	Actual cell number	Plated
pMTIV	1	Valine-free medium (day2)	205000	820000	205000
pMTIV	2	Valine-free medium (day2)	200000	800000	200000
pMTIV	3	Valine-free medium (day2)	191700	766800	191700
Counted cells on 4/22/21 and plated 1/2 in new wells. Counted 250ul suspended in 1ml total pbs
Line	Replicate	Medium	Count (cells / ml)	Actual cell number	Plated
pMTIV	1	Valine-free medium (day6)	123900	495600	247800
pMTIV	2	Valine-free medium (day6)	110200	440800	220400
pMTIV	3	Valine-free medium (day6)	128300	513200	256600
Counted cells on 4/26/21 and plated 1/2 in new wells. Counted 250ul suspended in 1ml total pbs (4:30pm)
Line	Replicate	Medium	Count (cells / ml)	Actual cell number	Plated
pMTIV	1	Valine-free medium (day10)	111200	444800	222400
pMTIV	2	Valine-free medium (day10)	115000	460000	230000
pMTIV	3	Valine-free medium (day10)	116300	465200	232600
Counted cells on 4/30/21 and plated 3/4 in new wells. Counted 250ul suspended in 1ml total pbs (4:30pm)
Line	Replicate	Medium	Count (cells / ml)	Actual cell number	Plated
pMTIV	1	Valine-free medium (day14)	66560	266240	199680
pMTIV	2	Valine-free medium (day14)	69020	276080	207060
pMTIV	3	Valine-free medium (day14)	79390	317560	238170
Counted cells on 5/4/21 and plated 3/4 in new wells. Counted 250ul suspended in 1ml total pbs (4:30pm)
Line	Replicate	Medium	Count (cells / ml)	Actual cell number	Plated
pMTIV	1	Valine-free medium (day18)	73970	295880	221910
pMTIV	2	Valine-free medium (day18)	79210	316840	237630
pMTIV	3	Valine-free medium (day18)	101700	406800	305100
Counted cells on 5/10/21 and plated 3/4 in new wells. Counted 250ul suspended in 1ml total pbs (6pm)
Line	Replicate	Medium	Count (cells / ml)	Actual cell number	Plated
pMTIV	1	Valine-free medium (day24)	47810	191240	143430
pMTIV	2	Valine-free medium (day24)	39090	156360	117270
pMTIV	3	Valine-free medium (day24)	38780	155120	116340
Counted cells on 5/20/21 and plated 3/4 in new wells. Counted 250ul suspended in 1ml total pbs (6pm)
Line	Replicate	Medium	Count (cells / ml)	Actual cell number	Plated
pMTIV	1	Valine-free medium (day34)	99410	397640	298230
pMTIV	2	Valine-free medium (day34)	41840	167360	125520
pMTIV	3	Valine-free medium (day34)	50840	203360	152520
Counted cells on 5/29/21 and plated 3/4 in new wells. Counted 125ul in 500ul total (6pm)
Line	Replicate	Medium	Count (cells / ml)	Actual cell number	Plated
pMTIV	1	Valine-free medium (day43)	82030	164060	123045
pMTIV	2	Valine-free medium (day43)	81200	162400	121800
pMTIV	3	Valine-free medium (day43)	92550	185100	138825
Counted cells on 6/4/21 and froze the remainder of cells down
Line	Replicate	Medium	Count (cells / ml)	Actual cell number	Frozen per vial (2 vials total per population)
pMTIV	1	Valine-free medium (day49)	14910	149100	67095
pMTIV	2	Valine-free medium (day49)	15530	155300	69885
pMTIV	3	Valine-free medium (day49)	18400	184000	82800
