# Supplementary material for: Resurrecting essential amino acid biosynthesis in mammalian cells
Source: eLife journal article supplement (doi:10.7554/elife.72847), 2022-09-27
Supplement: supp [file Figure 3-figure supplement 1-source data 1.xlsx]

## Sheet: Sample Key
Sample Key
S03916	pMTIV complete medium
S03918	pCtrl complete medium
S03920	pMTIV valine-free medium

## Sheet: C
S03918 XIC 13C valine			S03918 XIC 13C/15N valine			S03920 XIC 13C valine			S03920 XIC 13C/15N valine
Time	Intensity		Time	Intensity		Time	Intensity		Time	Intensity
0.00622291	0		0.00622291	0		0.00622192	0		0.00622192	0
0.0205626	0		0.0205626	0		0.0205324	0		0.0205324	0
0.0323001	0		0.0323001	0		0.0322677	0		0.0322677	0
0.0440356	0		0.0440356	0		0.0440053	0		0.0440053	0
0.0557772	0		0.0557772	0		0.0557429	0		0.0557429	0
0.0675148	0		0.0675148	0		0.0674846	0		0.0674846	0
0.07925	0		0.07925	0		0.0792179	0		0.0792179	0
0.0909876	0		0.0909876	0		0.0909595	0		0.0909595	0
0.102723	0		0.102723	0		0.102697	0		0.102697	0
0.116165	0		0.116165	3372.55		0.116407	0		0.116407	28061.1
0.128942	0		0.128942	2169.96		0.128935	0		0.128935	9655.97
0.140759	0		0.140759	2140.68		0.140755	0		0.140755	14780.2
0.153638	0		0.153638	1795.94		0.153626	0		0.153626	7145.17
0.166521	0		0.166521	1419.01		0.166505	0		0.166505	8300.18
0.179436	0		0.179436	0		0.179401	0		0.179401	6652.41
0.192327	0		0.192327	1236.01		0.192287	0		0.192287	6538.61
0.204181	0		0.204181	1164.71		0.204118	0		0.204118	9168.47
0.216	0		0.216	1074.86		0.215962	0		0.215962	7836.37
0.227821	0		0.227821	1457.35		0.227781	0		0.227781	6416.32
0.239663	0		0.239663	1683.07		0.239626	0		0.239626	1852.96
0.251494	0		0.251494	0		0.251449	0		0.251449	1897.3
0.264396	0		0.264396	828.829		0.263272	0		0.263272	1048.02
0.276219	0		0.276219	2108.53		0.275091	0		0.275091	6027.18
0.288042	0		0.288042	0		0.286914	0		0.286914	1727.38
0.299863	0		0.299863	0		0.298733	0		0.298733	5470.29
0.312771	0		0.312771	0		0.311614	0		0.311614	1036.7
0.324598	0		0.324598	0		0.323433	0		0.323433	0
0.336432	0		0.336432	0		0.335247	0		0.335247	4971.48
0.348252	0		0.348252	1100.47		0.347066	0		0.347066	1947.46
0.360079	0		0.360079	0		0.358897	0		0.358897	1071.79
0.371894	0		0.371894	0		0.370716	0		0.370716	4132.19
0.383725	0		0.383725	0		0.382537	0		0.382537	4067.5
0.395546	0		0.395546	0		0.394354	0		0.394354	4486.23
0.407365	0		0.407365	1160.26		0.406174	0		0.406174	1738.81
0.419177	0		0.419177	0		0.417989	0		0.417989	4225.01
0.430996	0		0.430996	1312.45		0.429816	0		0.429816	1042.04
0.442821	0		0.442821	0		0.441624	0		0.441624	0
0.454642	0		0.454642	851.572		0.453445	0		0.453445	1000.58
0.466455	0		0.466455	919.836		0.465279	0		0.465279	0
0.478275	0		0.478275	0		0.4771	0		0.4771	0
0.490111	0		0.490111	0		0.488943	0		0.488943	0
0.501928	0		0.501928	0		0.500762	0		0.500762	990.207
0.513767	0		0.513767	853.169		0.512583	0		0.512583	0
0.525588	0		0.525588	0		0.524433	0		0.524433	1631.63
0.537405	0		0.537405	0		0.536252	0		0.536252	1035
0.549221	0		0.549221	0		0.548064	0		0.548064	0
0.561038	0		0.561038	0		0.559879	0		0.559879	1472.61
0.572857	0		0.572857	999.61		0.571691	0		0.571691	918.558
0.584676	0		0.584676	0		0.584612	0		0.584612	0
0.59649	0		0.59649	0		0.596429	0		0.596429	1945.2
0.608319	0		0.608319	0		0.608256	0		0.608256	1025.95
0.620136	0		0.620136	0		0.620077	0		0.620077	1225.14
0.631967	0		0.631967	0		0.6319	0		0.6319	1955.03
0.643778	0		0.643778	0		0.643723	0		0.643723	0
0.655594	0		0.655594	0		0.655537	0		0.655537	0
0.66743	0		0.66743	0		0.667356	0		0.667356	1204.64
0.679249	0		0.679249	0		0.679004	0		0.679004	1687.95
0.691076	0		0.691076	0		0.690821	0		0.690821	0
0.702896	0		0.702896	0		0.702646	0		0.702646	0
0.714713	0		0.714713	0		0.714468	0		0.714468	1741.14
0.726532	0		0.726532	0		0.726314	0		0.726314	0
0.738353	0		0.738353	0		0.738133	0		0.738133	0
0.750165	0		0.750165	0		0.749954	0		0.749954	0
0.761988	0		0.761988	0		0.761773	0		0.761773	0
0.773811	0		0.773811	0		0.773602	0		0.773602	0
0.786728	0		0.786728	0		0.785421	0		0.785421	0
0.798542	0		0.798542	976.748		0.797241	0		0.797241	1189.54
0.810363	0		0.810363	0		0.809056	0		0.809056	1185.71
0.82218	0		0.82218	0		0.820885	0		0.820885	0
0.834001	0		0.834001	0		0.832708	0		0.832708	1564.91
0.84582	0		0.84582	0		0.844525	0		0.844525	0
0.857643	0		0.857643	0		0.856344	0		0.856344	0
0.869465	0		0.869465	0		0.868162	0		0.868162	0
0.881282	0		0.881282	0		0.880004	0		0.880004	1190.92
0.893107	0		0.893107	0		0.891827	0		0.891827	1475.34
0.90493	0		0.90493	0		0.903658	0		0.903658	1195.92
0.916745	0		0.916745	0		0.915483	0		0.915483	0
0.928559	0		0.928559	0		0.927304	0		0.927304	0
0.940411	0		0.940411	0		0.939121	0		0.939121	0
0.952228	0		0.952228	0		0.950948	0		0.950948	0
0.964045	0		0.964045	0		0.962771	0		0.962771	0
0.975872	0		0.975872	0		0.974589	0		0.974589	887.146
0.987691	0		0.987691	0		0.986404	0		0.986404	0
0.999507	0		0.999507	0		0.998225	0		0.998225	0
1.01133	0		1.01133	0		1.01005	0		1.01005	1283.76
1.02317	785.33		1.02317	0		1.02187	0		1.02187	0
1.035	0		1.035	0		1.03369	0		1.03369	1134.08
1.04682	0		1.04682	0		1.04552	0		1.04552	0
1.05864	0		1.05864	0		1.05734	0		1.05734	1146.56
1.07046	0		1.07046	0		1.06916	0		1.06916	0
1.08228	0		1.08228	0		1.081	0		1.081	935.523
1.09411	0		1.09411	0		1.09282	0		1.09282	0
1.10593	0		1.10593	0		1.10465	0		1.10465	0
1.11775	0		1.11775	0		1.11647	0		1.11647	0
1.12957	0		1.12957	0		1.1283	0		1.1283	980.999
1.14139	0		1.14139	867.514		1.14012	0		1.14012	910.403
1.15321	0		1.15321	0		1.15194	0		1.15194	0
1.16503	0		1.16503	0		1.16376	0		1.16376	0
1.17686	0		1.17686	0		1.17558	0		1.17558	844.283
1.18868	0		1.18868	0		1.1874	0		1.1874	0
1.20051	0		1.20051	0		1.19922	0		1.19922	1133.36
1.21234	0		1.21234	0		1.21104	0		1.21104	1047.52
1.22416	0		1.22416	0		1.22286	0		1.22286	0
1.23598	0		1.23598	0		1.2347	0		1.2347	0
1.24781	0		1.24781	0		1.24653	0		1.24653	0
1.25962	0		1.25962	0		1.25836	0		1.25836	0
1.27144	0		1.27144	0		1.27019	0		1.27019	0
1.28326	0		1.28326	0		1.282	0		1.282	0
1.29507	0		1.29507	0		1.29382	0		1.29382	0
1.30689	0		1.30689	0		1.30565	0		1.30565	0
1.31871	0		1.31871	0		1.31746	0		1.31746	932.551
1.33053	0		1.33053	0		1.32928	0		1.32928	0
1.34235	0		1.34235	0		1.3411	0		1.3411	0
1.35419	0		1.35419	0		1.35292	0		1.35292	0
1.36601	0		1.36601	0		1.36474	0		1.36474	0
1.37785	0		1.37785	0		1.37656	0		1.37656	0
1.38967	0		1.38967	0		1.38837	0		1.38837	0
1.4015	0		1.4015	0		1.40019	0		1.40019	1070.94
1.41331	0		1.41331	0		1.41203	0		1.41203	0
1.42515	0		1.42515	0		1.42385	0		1.42385	0
1.43697	0		1.43697	0		1.43569	0		1.43569	0
1.44879	0		1.44879	0		1.44751	0		1.44751	0
1.46061	0		1.46061	0		1.45933	0		1.45933	0
1.47243	0		1.47243	0		1.47114	0		1.47114	0
1.48425	0		1.48425	0		1.48296	0		1.48296	1120.88
1.49607	0		1.49607	0		1.49478	0		1.49478	0
1.50789	0		1.50789	0		1.5066	0		1.5066	1062.83
1.51971	0		1.51971	0		1.51843	0		1.51843	1193.51
1.53155	0		1.53155	0		1.53025	0		1.53025	0
1.54338	0		1.54338	0		1.54206	0		1.54206	0
1.55521	0		1.55521	0		1.5539	0		1.5539	0
1.56809	0		1.56809	0		1.56678	0		1.56678	0
1.57992	0		1.57992	0		1.5786	0		1.5786	1021.42
1.59173	0		1.59173	0		1.59042	0		1.59042	0
1.60356	0		1.60356	0		1.60224	0		1.60224	0
1.61538	0		1.61538	0		1.61405	0		1.61405	0
1.62722	0		1.62722	0		1.62588	0		1.62588	0
1.63904	0		1.63904	0		1.6377	0		1.6377	0
1.65086	0		1.65086	0		1.64952	0		1.64952	0
1.66268	0		1.66268	0		1.66136	0		1.66136	0
1.67451	0		1.67451	0		1.67318	0		1.67318	1024.65
1.68634	0		1.68634	0		1.685	0		1.685	0
1.69817	0		1.69817	0		1.69682	0		1.69682	0
1.70999	0		1.70999	0		1.70863	0		1.70863	0
1.72181	0		1.72181	0		1.72045	0		1.72045	1302.17
1.73363	0		1.73363	0		1.73227	0		1.73227	0
1.74545	0		1.74545	0		1.7441	0		1.7441	0
1.75726	0		1.75726	0		1.75592	0		1.75592	0
1.76909	0		1.76909	0		1.76774	0		1.76774	0
1.7809	0		1.7809	0		1.77956	0		1.77956	0
1.79273	0		1.79273	0		1.79138	0		1.79138	0
1.80561	0		1.80561	0		1.8032	0		1.8032	0
1.81743	0		1.81743	0		1.81503	0		1.81503	0
1.82925	0		1.82925	0		1.82685	0		1.82685	0
1.84213	0		1.84213	0		1.83977	0		1.83977	822.062
1.85395	0		1.85395	0		1.85159	0		1.85159	0
1.86577	0		1.86577	0		1.86341	0		1.86341	0
1.87759	0		1.87759	0		1.87523	0		1.87523	0
1.88942	0		1.88942	0		1.88705	0		1.88705	0
1.90123	0		1.90123	0		1.89887	0		1.89887	0
1.91304	0		1.91304	0		1.91068	0		1.91068	0
1.92487	0		1.92487	0		1.9225	0		1.9225	798.489
1.9367	0		1.9367	0		1.93432	0		1.93432	0
1.94853	0		1.94853	0		1.94615	0		1.94615	0
1.96035	0		1.96035	0		1.95797	0		1.95797	0
1.97217	0		1.97217	0		1.96979	0		1.96979	0
1.98399	0		1.98399	0		1.98161	0		1.98161	0
1.99581	0		1.99581	0		1.99343	0		1.99343	0
2.00763	0		2.00763	0		2.00524	0		2.00524	0
2.01945	0		2.01945	0		2.01708	0		2.01708	0
2.03128	0		2.03128	0		2.0289	0		2.0289	0
2.0442	0		2.0442	0		2.04178	0		2.04178	0
2.05602	0		2.05602	0		2.0536	0		2.0536	0
2.06785	0		2.06785	0		2.06543	0		2.06543	0
2.07967	0		2.07967	0		2.07725	0		2.07725	0
2.09149	0		2.09149	0		2.0891	0		2.0891	0
2.10331	0		2.10331	0		2.10093	0		2.10093	0
2.11514	0		2.11514	0		2.11275	0		2.11275	0
2.12696	0		2.12696	0		2.12457	0		2.12457	0
2.13877	0		2.13877	1113.58		2.13639	0		2.13639	0
2.15059	0		2.15059	0		2.14821	0		2.14821	0
2.16241	0		2.16241	0		2.16003	0		2.16003	0
2.17426	1045.4		2.17426	0		2.17185	0		2.17185	0
2.18609	0		2.18609	0		2.18367	0		2.18367	0
2.19792	0		2.19792	0		2.19549	0		2.19549	0
2.20974	0		2.20974	0		2.20731	0		2.20731	0
2.22156	0		2.22156	0		2.21913	0		2.21913	0
2.23338	0		2.23338	0		2.23095	0		2.23095	0
2.2452	0		2.2452	0		2.24279	0		2.24279	0
2.25703	0		2.25703	0		2.25462	0		2.25462	0
2.26885	0		2.26885	0		2.26645	0		2.26645	0
2.28066	0		2.28066	0		2.27828	0		2.27828	0
2.29248	0		2.29248	0		2.29011	0		2.29011	0
2.3043	0		2.3043	0		2.30193	0		2.30193	0
2.31613	0		2.31613	0		2.31376	0		2.31376	1186.32
2.32794	0		2.32794	0		2.32557	0		2.32557	0
2.33976	0		2.33976	0		2.33739	0		2.33739	0
2.3516	0		2.3516	0		2.34921	0		2.34921	0
2.36342	0		2.36342	0		2.36107	0		2.36107	0
2.37526	0		2.37526	0		2.37289	0		2.37289	0
2.38709	0		2.38709	0		2.3847	0		2.3847	0
2.39891	0		2.39891	0		2.39652	0		2.39652	0
2.41073	0		2.41073	0		2.40836	0		2.40836	0
2.42256	0		2.42256	0		2.42018	0		2.42018	0
2.43438	0		2.43438	0		2.432	0		2.432	0
2.4462	0		2.4462	0		2.44382	0		2.44382	0
2.45801	0		2.45801	0		2.45565	0		2.45565	0
2.46984	0		2.46984	0		2.46747	0		2.46747	0
2.48166	0		2.48166	0		2.47928	0		2.47928	0
2.49348	0		2.49348	0		2.49111	0		2.49111	0
2.5053	0		2.5053	0		2.50292	0		2.50292	0
2.51712	0		2.51712	0		2.51475	0		2.51475	0
2.52897	0		2.52897	0		2.52657	0		2.52657	0
2.5408	0		2.5408	0		2.53839	0		2.53839	0
2.55262	0		2.55262	0		2.55021	0		2.55021	0
2.56444	0		2.56444	0		2.56203	0		2.56203	0
2.57626	0		2.57626	0		2.57385	0		2.57385	0
2.58808	0		2.58808	0		2.58566	0		2.58566	0
2.59991	0		2.59991	0		2.59749	0		2.59749	0
2.61174	0		2.61174	0		2.60932	0		2.60932	0
2.62355	0		2.62355	0		2.62115	0		2.62115	0
2.63537	0		2.63537	0		2.63297	0		2.63297	0
2.6472	0		2.6472	0		2.64479	0		2.64479	0
2.65902	0		2.65902	0		2.6566	0		2.6566	0
2.67083	0		2.67083	0		2.66842	0		2.66842	0
2.68265	0		2.68265	0		2.68025	0		2.68025	0
2.69447	0		2.69447	0		2.69206	0		2.69206	0
2.70631	0		2.70631	0		2.70388	0		2.70388	0
2.71812	0		2.71812	0		2.7157	0		2.7157	0
2.72997	0		2.72997	0		2.72867	0		2.72867	0
2.74293	0		2.74293	0		2.74162	0		2.74162	0
2.75588	0		2.75588	0		2.75335	0		2.75335	0
2.7677	0		2.7677	0		2.76497	0		2.76497	1235
2.77954	0		2.77954	0		2.77734	0		2.77734	0
2.79109	0		2.79109	0		2.7891	0		2.7891	0
2.80356	0		2.80356	0		2.80125	0		2.80125	0
2.81592	0		2.81592	0		2.81327	0		2.81327	0
2.82762	0		2.82762	0		2.82509	0		2.82509	0
2.83932	0		2.83932	0		2.83706	0		2.83706	0
2.85143	0		2.85143	0		2.84879	0		2.84879	0
2.86345	0		2.86345	0		2.86055	0		2.86055	0
2.87554	0		2.87554	0		2.87225	0		2.87225	0
2.88731	0		2.88731	0		2.88409	0		2.88409	0
2.89899	0		2.89899	0		2.89581	0		2.89581	0
2.91075	0		2.91075	0		2.90767	0		2.90767	0
2.92266	0		2.92266	0		2.91943	0		2.91943	0
2.9346	0		2.9346	0		2.93114	0		2.93114	0
2.94639	0		2.94639	0		2.94292	0		2.94292	0
2.95819	0		2.95819	0		2.95455	0		2.95455	0
2.97002	0		2.97002	0		2.96614	0		2.96614	0
2.98186	0		2.98186	0		2.97776	0		2.97776	0
2.99368	0		2.99368	0		2.9894	0		2.9894	0
3.00545	0		3.00545	0		3.00097	0		3.00097	0
3.01721	0		3.01721	0		3.01252	0		3.01252	0
3.02892	0		3.02892	0		3.02406	0		3.02406	0
3.04063	0		3.04063	0		3.03567	0		3.03567	0
3.05248	0		3.05248	0		3.04726	0		3.04726	0
3.06422	0		3.06422	0		3.05884	0		3.05884	0
3.07587	0		3.07587	0		3.07038	0		3.07038	0
3.08758	0		3.08758	0		3.08191	0		3.08191	0
3.09934	0		3.09934	0		3.09344	0		3.09344	0
3.11115	0		3.11115	0		3.10502	0		3.10502	0
3.12293	0		3.12293	0		3.11658	0		3.11658	0
3.13462	0		3.13462	0		3.1282	0		3.1282	0
3.14632	0		3.14632	0		3.13977	0		3.13977	0
3.15805	0		3.15805	0		3.15139	0		3.15139	0
3.16979	0		3.16979	0		3.16301	0		3.16301	0
3.18152	0		3.18152	0		3.17484	0		3.17484	0
3.19331	0		3.19331	0		3.18642	0		3.18642	0
3.20507	0		3.20507	0		3.19798	0		3.19798	0
3.21686	0		3.21686	0		3.20963	0		3.20963	0
3.22858	0		3.22858	0		3.22121	0		3.22121	0
3.2403	0		3.2403	3709.78		3.2327	0		3.2327	0
3.252	0		3.252	0		3.24423	0		3.24423	0
3.26369	0		3.26369	0		3.25575	0		3.25575	0
3.27539	0		3.27539	0		3.26736	0		3.26736	0
3.28723	0		3.28723	0		3.2789	0		3.2789	0
3.29896	0		3.29896	0		3.29043	0		3.29043	0
3.31076	0		3.31076	0		3.302	0		3.302	0
3.32242	0		3.32242	0		3.31357	0		3.31357	0
3.33434	0		3.33434	0		3.32509	0		3.32509	0
3.34619	0		3.34619	0		3.33664	0		3.33664	0
3.35805	0		3.35805	0		3.34849	0		3.34849	0
3.3699	0		3.3699	0		3.36036	0		3.36036	0
3.38171	0		3.38171	0		3.37197	0		3.37197	0
3.39351	0		3.39351	0		3.38362	0		3.38362	0
3.40542	0		3.40542	0		3.39547	0		3.39547	0
3.41731	0		3.41731	0		3.40736	0		3.40736	0
3.42913	0		3.42913	0		3.41921	0		3.41921	0
3.44113	0		3.44113	0		3.43095	0		3.43095	0
3.45291	0		3.45291	0		3.44273	0		3.44273	0
3.46484	0		3.46484	0		3.4545	0		3.4545	0
3.47661	0		3.47661	0		3.46626	0		3.46626	0
3.48867	0		3.48867	0		3.47806	0		3.47806	0
3.50088	0		3.50088	0		3.48997	0		3.48997	0
3.51292	0		3.51292	0		3.50184	0		3.50184	0
3.525	0		3.525	0		3.51378	0		3.51378	0
3.53688	0		3.53688	0		3.5257	0		3.5257	0
3.54876	0		3.54876	0		3.53758	0		3.53758	0
3.56099	0		3.56099	0		3.54964	0		3.54964	0
3.57287	0		3.57287	0		3.56179	0		3.56179	0
3.5846	0		3.5846	0		3.57405	0		3.57405	0
3.59625	0		3.59625	0		3.58628	0		3.58628	0
3.60794	0		3.60794	0		3.5983	0		3.5983	0
3.61973	0		3.61973	0		3.61005	0		3.61005	0
3.63154	0		3.63154	0		3.62178	0		3.62178	0
3.64342	0		3.64342	0		3.63365	0		3.63365	0
3.65538	0		3.65538	0		3.64615	0		3.64615	0
3.66737	0		3.66737	0		3.65796	0		3.65796	0
3.6794	0		3.6794	0		3.66991	0		3.66991	0
3.69144	0		3.69144	0		3.68169	0		3.68169	0
3.70357	0		3.70357	0		3.69345	0		3.69345	0
3.71553	0		3.71553	0		3.70537	0		3.70537	0
3.72777	0		3.72777	0		3.71722	0		3.71722	0
3.73986	0		3.73986	0		3.729	0		3.729	0
3.75202	0		3.75202	0		3.7416	0		3.7416	0
3.76387	0		3.76387	0		3.7543	0		3.7543	0
3.77562	0		3.77562	0		3.7661	0		3.7661	0
3.78775	0		3.78775	0		3.77793	0		3.77793	0
3.79971	0		3.79971	0		3.79072	0		3.79072	0
3.81141	0		3.81141	0		3.80257	0		3.80257	0
3.82331	0		3.82331	0		3.81424	0		3.81424	0
3.83512	0		3.83512	0		3.82602	0		3.82602	0
3.84692	0		3.84692	0		3.83785	0		3.83785	0
3.85878	0		3.85878	0		3.84986	0		3.84986	0
3.87054	0		3.87054	0		3.86174	0		3.86174	0
3.88238	0		3.88238	0		3.87358	0		3.87358	0
3.89437	0		3.89437	0		3.8854	0		3.8854	0
3.90622	0		3.90622	0		3.89725	0		3.89725	0
3.91803	0		3.91803	0		3.90908	0		3.90908	0
3.93045	0		3.93045	0		3.92081	0		3.92081	0
3.9423	0		3.9423	0		3.93272	0		3.93272	0
3.95422	0		3.95422	0		3.94455	0		3.94455	0
3.96604	0		3.96604	0		3.95636	0		3.95636	0
3.97802	0		3.97802	0		3.96818	0		3.96818	0
3.98981	0		3.98981	0		3.97999	0		3.97999	0
4.0017	0		4.0017	0		3.99182	0		3.99182	0
4.0134	0		4.0134	0		4.00364	0		4.00364	0
4.02519	0		4.02519	0		4.01656	0		4.01656	0
4.03734	0		4.03734	0		4.02838	0		4.02838	0
4.04916	0		4.04916	0		4.0402	0		4.0402	0
4.06096	0		4.06096	0		4.05202	0		4.05202	0
4.07282	0		4.07282	0		4.06384	0		4.06384	0
4.08463	0		4.08463	0		4.07566	0		4.07566	0
4.09627	0		4.09627	0		4.08748	0		4.08748	0
4.10816	0		4.10816	0		4.09929	0		4.09929	0
4.12108	0		4.12108	0		4.11112	0		4.11112	0
4.1329	0		4.1329	0		4.12296	0		4.12296	0
4.14474	0		4.14474	0		4.13478	0		4.13478	0
4.15655	0		4.15655	0		4.14767	0		4.14767	0
4.16837	0		4.16837	0		4.15949	0		4.15949	0
4.18127	0		4.18127	0		4.17131	0		4.17131	0
4.19302	0		4.19302	0		4.18312	0		4.18312	0
4.20488	0		4.20488	0		4.19496	0		4.19496	0
4.21677	0		4.21677	0		4.20679	0		4.20679	0
4.22859	0		4.22859	0		4.21862	0		4.21862	0
4.24042	0		4.24042	0		4.23044	0		4.23044	0
4.25215	0		4.25215	0		4.24226	0		4.24226	0
4.26406	0		4.26406	0		4.25409	0		4.25409	0
4.27588	0		4.27588	0		4.26591	0		4.26591	0
4.2877	0		4.2877	0		4.2788	0		4.2788	0
4.2995	0		4.2995	0		4.29062	0		4.29062	0
4.31135	0		4.31135	0		4.30244	0		4.30244	0
4.32307	0		4.32307	0		4.31426	0		4.31426	0
4.33499	0		4.33499	0		4.32608	0		4.32608	0
4.3468	0		4.3468	0		4.33791	0		4.33791	0
4.35862	0		4.35862	0		4.34973	0		4.34973	0
4.37042	0		4.37042	0		4.36156	0		4.36156	0
4.38227	0		4.38227	0		4.37338	0		4.37338	0
4.39515	0		4.39515	0		4.38521	0		4.38521	0
4.40698	0		4.40698	0		4.39814	0		4.39814	0
4.41974	0		4.41974	0		4.40996	0		4.40996	0
4.43169	0		4.43169	0		4.42178	0		4.42178	0
4.44351	0		4.44351	0		4.43362	0		4.43362	0
4.45522	0		4.45522	0		4.44652	0		4.44652	0
4.46706	0		4.46706	0		4.45833	0		4.45833	0
4.47886	0		4.47886	0		4.47016	0		4.47016	0
4.49076	0		4.49076	0		4.48197	0		4.48197	0
4.50335	0		4.50335	0		4.49379	0		4.49379	0
4.5154	0		4.5154	0		4.50562	897.471		4.50562	0
4.52694	0		4.52694	0		4.5185	0		4.5185	0
4.53874	0		4.53874	0		4.53032	0		4.53032	0
4.55067	1089.32		4.55067	0		4.54216	0		4.54216	0
4.56336	1188.1		4.56336	0		4.55397	0		4.55397	0
4.5752	1187.12		4.5752	0		4.56579	0		4.56579	0
4.58785	0		4.58785	0		4.57763	0		4.57763	0
4.59958	0		4.59958	0		4.58944	0		4.58944	0
4.61134	0		4.61134	0		4.60128	1146.25		4.60128	0
4.62385	0		4.62385	0		4.6131	0		4.6131	0
4.63629	0		4.63629	0		4.62492	0		4.62492	0
4.64814	0		4.64814	0		4.63673	0		4.63673	0
4.66	0		4.66	0		4.64855	0		4.64855	0
4.67182	0		4.67182	0		4.66037	0		4.66037	0
4.68371	0		4.68371	0		4.67219	0		4.67219	0
4.69541	1480.7		4.69541	0		4.68402	0		4.68402	0
4.70728	2318.48		4.70728	0		4.69585	0		4.69585	0
4.71914	2470.77		4.71914	0		4.70766	0		4.70766	0
4.73086	2167.44		4.73086	0		4.71948	0		4.71948	0
4.74276	4447.59		4.74276	0		4.73238	0		4.73238	0
4.75452	1612.24		4.75452	0		4.74421	0		4.74421	0
4.76636	7206.04		4.76636	0		4.75603	0		4.75603	0
4.7783	4849.87		4.7783	0		4.76785	0		4.76785	0
4.79006	5016.47		4.79006	0		4.77967	0		4.77967	0
4.80188	0		4.80188	0		4.79151	0		4.79151	0
4.81379	5336.76		4.81379	0		4.80332	0		4.80332	0
4.82572	4072.24		4.82572	0		4.81514	0		4.81514	0
4.83742	2819.98		4.83742	0		4.82699	0		4.82699	0
4.84926	3784.82		4.84926	0		4.8388	0		4.8388	0
4.86119	1877.64		4.86119	0		4.85168	0		4.85168	0
4.87296	1231.69		4.87296	0		4.86351	0		4.86351	0
4.88491	1969.18		4.88491	0		4.87532	0		4.87532	0
4.89681	0		4.89681	0		4.88714	0		4.88714	0
4.90863	941.475		4.90863	0		4.89898	0		4.89898	0
4.92045	0		4.92045	0		4.91081	0		4.91081	1121
4.93227	1955.54		4.93227	0		4.92325	2295.4		4.92325	0
4.94402	0		4.94402	0		4.93558	0		4.93558	0
4.95592	0		4.95592	0		4.9475	5446.84		4.9475	0
4.96773	0		4.96773	0		4.9594	0		4.9594	1489.06
4.97955	0		4.97955	0		4.97137	5556.63		4.97137	0
4.99137	0		4.99137	0		4.98333	0		4.98333	0
5.00318	0		5.00318	0		4.9953	2050.48		4.9953	0
5.01608	0		5.01608	0		5.00712	1754.33		5.00712	0
5.02794	0		5.02794	0		5.01894	1452.08		5.01894	0
5.03976	0		5.03976	0		5.03076	1874.06		5.03076	0
5.05158	0		5.05158	0		5.04258	0		5.04258	0
5.0634	0		5.0634	0		5.05548	0		5.05548	0
5.07521	0		5.07521	0		5.06731	0		5.06731	0
5.08704	0		5.08704	0		5.07912	0		5.07912	0
5.09885	0		5.09885	0		5.09094	0		5.09094	0
5.11175	0		5.11175	0		5.10276	0		5.10276	0
5.12357	0		5.12357	0		5.11458	0		5.11458	0
5.13539	0		5.13539	0		5.1264	0		5.1264	0
5.1472	0		5.1472	0		5.13821	0		5.13821	0
5.15903	0		5.15903	0		5.15003	0		5.15003	0
5.17085	0		5.17085	0		5.16185	0		5.16185	0
5.18267	0		5.18267	0		5.1737	0		5.1737	0
5.19557	0		5.19557	0		5.18552	0		5.18552	0
5.20738	0		5.20738	0		5.19736	0		5.19736	0
5.2192	0		5.2192	0		5.20918	0		5.20918	0
5.23103	0		5.23103	0		5.221	0		5.221	0
5.24284	0		5.24284	0		5.23282	0		5.23282	0
5.25467	0		5.25467	0		5.24466	0		5.24466	0
5.2665	0		5.2665	0		5.25648	0		5.25648	0
5.27832	0		5.27832	0		5.26831	0		5.26831	0
5.29015	0		5.29015	0		5.28012	0		5.28012	0
5.30197	0		5.30197	0		5.29195	0		5.29195	0
5.31378	0		5.31378	0		5.30376	0		5.30376	0
5.3256	0		5.3256	0		5.31558	0		5.31558	0
5.33742	0		5.33742	0		5.32739	0		5.32739	0
5.34924	0		5.34924	0		5.33921	0		5.33921	0
5.36106	0		5.36106	0		5.35105	0		5.35105	0
5.37289	0		5.37289	0		5.36287	0		5.36287	0
5.38472	0		5.38472	0		5.37472	0		5.37472	0
5.39653	0		5.39653	0		5.38654	0		5.38654	0
5.40835	0		5.40835	0		5.39836	0		5.39836	0
5.42017	0		5.42017	0		5.41125	0		5.41125	0
5.43199	0		5.43199	0		5.42306	0		5.42306	0
5.44381	0		5.44381	0		5.43489	0		5.43489	0
5.45564	0		5.45564	0		5.44673	0		5.44673	0
5.46746	0		5.46746	0		5.45856	0		5.45856	0
5.47928	0		5.47928	0		5.47038	0		5.47038	0
5.49109	0		5.49109	0		5.4822	0		5.4822	0
5.50291	0		5.50291	0		5.49402	0		5.49402	0
5.51473	0		5.51473	0		5.50585	0		5.50585	0
5.52656	0		5.52656	0		5.51767	0		5.51767	0
5.53838	0		5.53838	0		5.5295	0		5.5295	0
5.55022	0		5.55022	0		5.54132	0		5.54132	0
5.56205	0		5.56205	0		5.55314	0		5.55314	0
5.57387	0		5.57387	0		5.56496	0		5.56496	0
5.58569	0		5.58569	0		5.57677	0		5.57677	0
5.59751	0		5.59751	0		5.5886	0		5.5886	0
5.60933	0		5.60933	0		5.60043	0		5.60043	0
5.62115	0		5.62115	0		5.61225	0		5.61225	0
5.63297	0		5.63297	0		5.62408	0		5.62408	0
5.64479	0		5.64479	0		5.6359	0		5.6359	0
5.65767	0		5.65767	0		5.64772	0		5.64772	0
5.66949	0		5.66949	0		5.66064	0		5.66064	0
5.68132	0		5.68132	0		5.67246	0		5.67246	0
5.69313	0		5.69313	0		5.68428	0		5.68428	0
5.70495	0		5.70495	0		5.6961	0		5.6961	1012.99
5.71676	0		5.71676	0		5.70793	0		5.70793	0
5.72858	0		5.72858	0		5.71975	0		5.71975	0
5.74041	0		5.74041	0		5.73157	0		5.73157	0
5.75223	0		5.75223	0		5.7434	0		5.7434	0
5.76512	0		5.76512	0		5.75522	0		5.75522	0
5.77694	0		5.77694	0		5.76705	0		5.76705	0
5.78875	0		5.78875	0		5.77994	0		5.77994	0
5.80057	0		5.80057	0		5.79175	0		5.79175	0
5.81239	0		5.81239	0		5.80358	0		5.80358	0
5.82531	0		5.82531	0		5.8154	0		5.8154	0
5.83713	0		5.83713	0		5.82722	0		5.82722	0
5.84895	0		5.84895	0		5.83906	0		5.83906	0
5.86076	0		5.86076	0		5.85087	0		5.85087	0
5.87258	0		5.87258	0		5.86269	0		5.86269	0
5.88547	0		5.88547	0		5.87451	0		5.87451	0
5.89728	0		5.89728	0		5.88632	0		5.88632	1055.02
5.9091	0		5.9091	0		5.89814	0		5.89814	0
5.92092	0		5.92092	0		5.90996	0		5.90996	0
5.93274	0		5.93274	0		5.92178	0		5.92178	0
5.94456	0		5.94456	0		5.9336	0		5.9336	0
5.95735	0		5.95735	0		5.94545	0		5.94545	0
5.97015	0		5.97015	0		5.95727	0		5.95727	0
5.98197	0		5.98197	0		5.96909	0		5.96909	0
5.99464	0		5.99464	0		5.98091	0		5.98091	0
6.00631	0		6.00631	0		5.99273	0		5.99273	0
6.01811	0		6.01811	0		6.00454	0		6.00454	0
6.02997	0		6.02997	0		6.01636	0		6.01636	0
6.04244	0		6.04244	0		6.02819	0		6.02819	0
6.05422	0		6.05422	0		6.04	0		6.04	0
6.06611	0		6.06611	0		6.05289	0		6.05289	0
6.07781	0		6.07781	0		6.0647	0		6.0647	0
6.08965	0		6.08965	0		6.07761	0		6.07761	0
6.10146	0		6.10146	0		6.08946	0		6.08946	0
6.11324	0		6.11324	0		6.10129	0		6.10129	1040.75
6.12506	0		6.12506	0		6.11311	0		6.11311	0
6.13695	0		6.13695	0		6.12493	0		6.12493	0
6.14873	0		6.14873	0		6.13675	0		6.13675	0
6.16057	0		6.16057	0		6.14967	0		6.14967	0
6.17236	0		6.17236	0		6.16148	0		6.16148	0
6.18426	0		6.18426	0		6.17331	0		6.17331	0
6.19612	0		6.19612	0		6.18513	0		6.18513	0
6.20857	0		6.20857	0		6.19696	0		6.19696	0
6.22041	0		6.22041	0		6.20878	0		6.20878	0
6.23224	0		6.23224	0		6.2206	0		6.2206	0
6.24402	0		6.24402	0		6.23245	0		6.23245	0
6.25588	0		6.25588	0		6.24427	0		6.24427	0
6.26768	0		6.26768	0		6.2561	0		6.2561	0
6.28019	0		6.28019	0		6.26792	0		6.26792	0
6.29203	0		6.29203	0		6.27975	0		6.27975	0
6.3039	0		6.3039	0		6.29157	0		6.29157	0
6.31577	0		6.31577	0		6.30339	0		6.30339	0
6.32755	0		6.32755	0		6.31521	0		6.31521	0
6.33931	0		6.33931	0		6.32702	0		6.32702	0
6.35124	0		6.35124	0		6.33884	0		6.33884	0
6.36368	0		6.36368	0		6.35065	0		6.35065	0
6.37614	0		6.37614	0		6.36248	0		6.36248	0
6.38796	0		6.38796	0		6.3743	0		6.3743	0
6.40034	0		6.40034	0		6.38613	0		6.38613	0
6.41283	0		6.41283	0		6.39795	0		6.39795	0
6.42451	0		6.42451	0		6.40979	0		6.40979	0
6.43692	0		6.43692	0		6.4216	0		6.4216	0
6.44861	0		6.44861	0		6.43343	0		6.43343	0
6.46045	0		6.46045	0		6.44526	0		6.44526	0
6.47239	0		6.47239	0		6.45707	0		6.45707	0
6.48414	0		6.48414	0		6.46996	0		6.46996	0
6.496	0		6.496	0		6.48179	0		6.48179	0
6.5078	0		6.5078	0		6.49362	0		6.49362	0
6.51963	0		6.51963	0		6.50546	0		6.50546	0
6.53149	0		6.53149	0		6.51728	0		6.51728	0
6.54331	0		6.54331	0		6.52911	0		6.52911	0
6.55519	0		6.55519	0		6.54093	0		6.54093	0
6.56704	0		6.56704	0		6.55275	0		6.55275	0
6.57895	0		6.57895	0		6.56456	0		6.56456	0
6.59085	0		6.59085	0		6.57638	0		6.57638	0
6.60273	0		6.60273	0		6.58821	0		6.58821	0
6.61449	0		6.61449	0		6.60003	0		6.60003	0
6.62635	0		6.62635	0		6.61185	0		6.61185	0
6.63827	0		6.63827	0		6.62367	0		6.62367	0
6.65012	0		6.65012	0		6.63549	0		6.63549	0
6.66199	0		6.66199	0		6.64731	0		6.64731	0
6.67382	0		6.67382	0		6.65915	0		6.65915	0
6.68564	0		6.68564	0		6.67203	0		6.67203	0
6.69745	0		6.69745	0		6.68385	0		6.68385	0
6.70929	0		6.70929	0		6.69568	0		6.69568	0
6.7211	0		6.7211	0		6.70749	0		6.70749	0
6.73293	0		6.73293	0		6.71931	0		6.71931	0
6.74475	0		6.74475	0		6.73117	0		6.73117	0
6.75656	0		6.75656	0		6.74299	0		6.74299	0
6.76838	0		6.76838	0		6.75482	0		6.75482	0
6.7813	0		6.7813	0		6.76665	0		6.76665	0
6.79312	0		6.79312	0		6.77847	0		6.77847	0
6.80494	0		6.80494	0		6.79028	0		6.79028	0
6.81676	0		6.81676	0		6.8021	0		6.8021	0
6.82858	0		6.82858	0		6.81391	0		6.81391	0
6.84039	0		6.84039	1023.12		6.82684	0		6.82684	0
6.85221	0		6.85221	0		6.83866	0		6.83866	0
6.86403	0		6.86403	0		6.85048	0		6.85048	0
6.87584	0		6.87584	0		6.8623	0		6.8623	0
6.88768	0		6.88768	0		6.87413	0		6.87413	0
6.90057	0		6.90057	0		6.88595	0		6.88595	0
6.91346	0		6.91346	0		6.89777	0		6.89777	0
6.92624	0		6.92624	0		6.91067	0		6.91067	0
6.93887	0		6.93887	0		6.92359	0		6.92359	0
6.95072	0		6.95072	0		6.93541	0		6.93541	0
6.96229	0		6.96229	0		6.94831	0		6.94831	0
6.9742	0		6.9742	0		6.96015	0		6.96015	0
6.98665	0		6.98665	0		6.97197	0		6.97197	0
6.99839	0		6.99839	0		6.98369	0		6.98369	0
7.0101	0		7.0101	0		6.99549	0		6.99549	0
7.02191	0		7.02191	0		7.00727	0		7.00727	0
7.03367	0		7.03367	0		7.01897	0		7.01897	0
7.0456	0		7.0456	1960.46		7.03162	0		7.03162	0
7.05729	0		7.05729	0		7.04418	0		7.04418	0
7.06917	0		7.06917	0		7.05608	0		7.05608	0
7.08139	0		7.08139	0		7.06779	0		7.06779	0
7.09319	0		7.09319	0		7.07966	0		7.07966	0
7.10501	0		7.10501	0		7.09157	0		7.09157	0
7.11727	0		7.11727	0		7.10334	0		7.10334	0
7.12947	0		7.12947	0		7.11523	0		7.11523	0
7.14138	0		7.14138	0		7.12702	0		7.12702	0
7.15358	0		7.15358	0		7.13887	0		7.13887	0
7.16542	0		7.16542	0		7.15091	0		7.15091	0
7.17772	0		7.17772	0		7.16267	0		7.16267	0
7.19014	0		7.19014	0		7.17449	0		7.17449	0
7.20194	0		7.20194	0		7.18738	0		7.18738	0
7.21381	0		7.21381	0		7.19921	0		7.19921	0
7.22624	0		7.22624	0		7.21102	0		7.21102	0
7.23815	0		7.23815	0		7.22287	0		7.22287	0
7.24999	0		7.24999	0		7.23468	0		7.23468	0
7.26193	0		7.26193	0		7.24651	0		7.24651	0
7.27382	0		7.27382	0		7.25834	0		7.25834	0
7.28575	0		7.28575	0		7.27017	0		7.27017	0
7.29764	0		7.29764	0		7.28199	0		7.28199	0
7.30947	0		7.30947	0		7.29381	0		7.29381	0
7.32128	0		7.32128	0		7.30562	0		7.30562	0
7.33315	0		7.33315	0		7.31745	0		7.31745	0
7.34498	0		7.34498	0		7.32927	0		7.32927	0
7.3568	0		7.3568	0		7.34109	0		7.34109	0
7.36862	0		7.36862	0		7.35291	0		7.35291	0
7.38149	0		7.38149	0		7.36473	0		7.36473	0
7.39332	0		7.39332	0		7.37657	0		7.37657	0
7.40513	0		7.40513	0		7.38839	0		7.38839	0
7.41695	0		7.41695	0		7.40022	0		7.40022	0
7.42877	0		7.42877	0		7.41205	0		7.41205	0
7.4406	0		7.4406	0		7.42388	0		7.42388	0
7.45241	0		7.45241	0		7.4357	0		7.4357	0
7.46423	0		7.46423	0		7.44752	0		7.44752	0
7.47606	0		7.47606	0		7.45934	0		7.45934	0
7.48894	0		7.48894	0		7.47116	0		7.47116	0
7.50077	0		7.50077	0		7.48404	0		7.48404	0
7.51251	0		7.51251	0		7.49693	0		7.49693	0
7.52436	0		7.52436	0		7.50875	0		7.50875	0
7.53724	0		7.53724	0		7.5206	0		7.5206	0
7.54889	0		7.54889	0		7.53242	0		7.53242	0
7.56068	0		7.56068	0		7.54424	0		7.54424	0
7.57238	0		7.57238	0		7.55607	0		7.55607	0
7.5842	0		7.5842	0		7.56781	0		7.56781	0
7.59671	0		7.59671	0		7.57956	0		7.57956	0
7.60846	0		7.60846	0		7.59134	0		7.59134	0
7.62027	0		7.62027	0		7.60307	0		7.60307	0
7.63204	0		7.63204	0		7.61491	0		7.61491	0
7.64391	0		7.64391	0		7.62671	0		7.62671	0
7.65565	0		7.65565	0		7.63854	0		7.63854	0
7.66748	0		7.66748	0		7.65104	0		7.65104	0
7.67931	0		7.67931	0		7.66287	0		7.66287	0
7.69111	0		7.69111	0		7.67469	0		7.67469	0
7.70293	0		7.70293	0		7.68661	0		7.68661	0
7.71524	0		7.71524	0		7.69836	0		7.69836	0
7.72704	0		7.72704	0		7.71022	0		7.71022	0
7.73888	0		7.73888	0		7.72214	0		7.72214	0
7.75072	0		7.75072	0		7.73405	0		7.73405	0
7.76263	0		7.76263	0		7.74584	0		7.74584	0
7.77432	0		7.77432	0		7.75775	0		7.75775	0
7.78617	0		7.78617	0		7.76963	0		7.76963	0
7.798	0		7.798	0		7.78151	0		7.78151	0
7.81043	0		7.81043	0		7.79332	0		7.79332	0
7.82203	0		7.82203	0		7.80514	0		7.80514	0
7.83412	0		7.83412	0		7.81696	0		7.81696	0
7.846	0		7.846	0		7.82878	0		7.82878	0
7.85781	0		7.85781	0		7.84062	0		7.84062	0
7.86951	0		7.86951	0		7.85244	0		7.85244	0
7.88144	0		7.88144	0		7.86427	0		7.86427	0
7.89323	0		7.89323	0		7.87609	0		7.87609	0
7.90523	0		7.90523	0		7.88792	0		7.88792	0
7.917	0		7.917	0		7.89973	0		7.89973	0
7.92874	0		7.92874	0		7.91156	0		7.91156	0
7.94065	0		7.94065	0		7.92338	0		7.92338	0
7.95235	0		7.95235	0		7.93616	0		7.93616	0
7.96406	0		7.96406	0		7.94793	0		7.94793	0
7.97602	0		7.97602	0		7.96073	0		7.96073	0
7.98784	0		7.98784	0		7.97236	0		7.97236	0
7.99955	0		7.99955	0		7.98412	0		7.98412	0
8.01126	0		8.01126	0		7.99592	0		7.99592	0
8.02312	0		8.02312	0		8.00834	1686.4		8.00834	0
8.03487	0		8.03487	0		8.0202	0		8.0202	0
8.04678	0		8.04678	0		8.03203	0		8.03203	0
8.05853	0		8.05853	0		8.04376	0		8.04376	0
8.07038	0		8.07038	0		8.05555	0		8.05555	0
8.08261	0		8.08261	0		8.06734	0		8.06734	0
8.0944	0		8.0944	0		8.07919	0		8.07919	0
8.10671	0		8.10671	0		8.091	0		8.091	0
8.11892	0		8.11892	0		8.10335	0		8.10335	0
8.13064	0		8.13064	0		8.11512	0		8.11512	0
8.14252	0		8.14252	0		8.12694	0		8.12694	0
8.15434	0		8.15434	0		8.13884	0		8.13884	0
8.1662	0		8.1662	0		8.1511	0		8.1511	0
8.17796	0		8.17796	0		8.16295	0		8.16295	0
8.19013	0		8.19013	0		8.17478	0		8.17478	0
8.2019	0		8.2019	0		8.18711	0		8.18711	0
8.21373	0		8.21373	1779.69		8.19889	0		8.19889	0
8.22583	0		8.22583	0		8.21072	0		8.21072	0
8.23768	0		8.23768	0		8.22261	0		8.22261	0
8.24953	0		8.24953	0		8.23441	0		8.23441	0
8.26131	0		8.26131	0		8.2462	0		8.2462	0
8.27316	0		8.27316	0		8.25805	0		8.25805	0
8.28507	0		8.28507	0		8.26985	0		8.26985	0
8.29691	0		8.29691	0		8.28168	0		8.28168	0
8.3087	0		8.3087	0		8.29349	0		8.29349	0
8.32054	0		8.32054	0		8.30593	0		8.30593	0
8.33241	0		8.33241	0		8.31767	0		8.31767	0
8.34473	0		8.34473	0		8.32959	0		8.32959	0
8.35667	0		8.35667	0		8.34137	0		8.34137	0
8.36854	0		8.36854	0		8.35326	0		8.35326	0
8.38042	0		8.38042	0		8.36507	0		8.36507	0
8.39221	0		8.39221	0		8.37693	0		8.37693	0
8.40411	0		8.40411	0		8.38875	0		8.38875	0
8.41594	0		8.41594	0		8.40058	0		8.40058	0
8.42778	0		8.42778	0		8.41247	0		8.41247	0
8.43966	0		8.43966	0		8.4243	0		8.4243	0
8.45165	0		8.45165	0		8.43613	0		8.43613	0
8.46345	0		8.46345	0		8.44796	0		8.44796	0
8.47533	0		8.47533	0		8.4598	0		8.4598	0
8.48821	0		8.48821	0		8.47165	0		8.47165	0
8.50001	0		8.50001	0		8.48344	0		8.48344	0
8.51173	0		8.51173	0		8.49528	0		8.49528	0
8.52363	0		8.52363	0		8.50724	0		8.50724	0
8.53548	0		8.53548	0		8.51906	0		8.51906	0
8.54732	0		8.54732	0		8.53084	0		8.53084	0
8.55913	0		8.55913	0		8.54275	0		8.54275	0
8.57095	0		8.57095	0		8.55459	0		8.55459	0
8.5828	0		8.5828	0		8.56644	0		8.56644	0
8.59462	0		8.59462	0		8.5783	0		8.5783	0
8.60646	0		8.60646	0		8.59012	0		8.59012	0
8.61828	0		8.61828	0		8.60196	0		8.60196	0
8.6301	0		8.6301	0		8.61378	0		8.61378	0
8.64192	0		8.64192	0		8.6256	0		8.6256	0
8.65373	0		8.65373	0		8.63742	0		8.63742	0
8.66555	0		8.66555	0		8.64923	0		8.64923	0
8.67737	0		8.67737	2812.27		8.66105	0		8.66105	0
8.6892	0		8.6892	2202.03		8.67286	0		8.67286	0
8.70102	0		8.70102	1699.52		8.68468	0		8.68468	0
8.71284	0		8.71284	1400.43		8.69651	0		8.69651	0
8.72467	0		8.72467	1256.46		8.70836	0		8.70836	1616.31
8.73648	0		8.73648	1579.02		8.72018	0		8.72018	2055.06
8.7483	0		8.7483	5014.37		8.732	0		8.732	3768.62
8.76013	0		8.76013	4390.11		8.74382	0		8.74382	3819.13
8.77195	0		8.77195	2851.71		8.75564	0		8.75564	2085.37
8.78379	0		8.78379	5259.56		8.76746	0		8.76746	1645.2
8.7956	0		8.7956	6430.7		8.77928	0		8.77928	4995.12
8.80742	0		8.80742	4602.11		8.79109	0		8.79109	4857.39
8.81925	0		8.81925	9099.04		8.80292	0		8.80292	6214.89
8.83106	0		8.83106	12704		8.81473	925.332		8.81473	5449.76
8.84289	997.072		8.84289	14048.6		8.82655	0		8.82655	6489.42
8.8547	0		8.8547	20146.3		8.83836	0		8.83836	9728.29
8.86653	0		8.86653	30502.4		8.85018	0		8.85018	13073.2
8.87835	0		8.87835	46312.4		8.86202	1570.5		8.86202	22122.8
8.89124	0		8.89124	89857.8		8.87385	1887.21		8.87385	30558
8.90305	0		8.90305	177919		8.88569	2027.85		8.88569	53082.7
8.91487	0		8.91487	303041		8.89751	4098.4		8.89751	95574
8.92669	0		8.92669	355635		8.90933	4818.07		8.90933	109664
8.93853	0		8.93853	560280		8.92115	13644.1		8.92115	248427
8.95035	0		8.95035	832557		8.93298	10584.6		8.93298	380267
8.96217	1158.66		8.96217	1.20049e+06		8.9448	17795.2		8.9448	494712
8.97399	0		8.97399	1.34705e+06		8.95662	20862.2		8.95662	660591
8.98581	0		8.98581	1.73256e+06		8.96844	35185.3		8.96844	889165
8.99869	0		8.99869	2.29141e+06		8.98027	67781.7		8.98027	1322296
9.01053	1869.06		9.01053	2.92196e+06		8.99209	65922.6		8.99209	1.67505e+06
9.02236	0		9.02236	3.75791e+06		9.00391	91931.8		9.00391	2.10211e+06
9.03418	0		9.03418	4258838		9.01679	148494		9.01679	2.59851e+06
9.046	0		9.046	4.84321e+06		9.02861	172570		9.02861	3.06998e+06
9.05782	0		9.05782	5774114		9.04043	195276		9.04043	3.36897e+06
9.06953	1288.16		9.06953	6.62491e+06		9.05226	264609		9.05226	4093137
9.08126	3538.5		9.08126	7.11475e+06		9.06408	280025		9.06408	4.6839e+06
9.09309	4825.2		9.09309	7459572		9.07591	340218		9.07591	5248709
9.10496	0		9.10496	7715721		9.08773	318156		9.08773	5.2218e+06
9.11673	2494.38		9.11673	8335496		9.09954	393443		9.09954	5828976
9.12848	1216.52		9.12848	8.28914e+06		9.11137	394275		9.11137	6.26416e+06
9.14027	0		9.14027	8.02202e+06		9.1232	405676		9.1232	6300404
9.15206	1410.08		9.15206	8595301		9.13505	387244		9.13505	6264971
9.16387	0		9.16387	8424815		9.14687	420729		9.14687	6669101
9.1763	2364.47		9.1763	8393986		9.15869	403398		9.15869	6285046
9.18811	2387.05		9.18811	8454642		9.17052	337650		9.17052	5906710
9.19992	2707.98		9.19992	7551922		9.18234	324175		9.18234	5.66565e+06
9.21163	0		9.21163	7.42209e+06		9.19522	317798		9.19522	5.41014e+06
9.22391	2851.5		9.22391	6.80763e+06		9.20706	285493		9.20706	5119300
9.23565	3585.55		9.23565	5860243		9.21989	220260		9.21989	4549657
9.24736	0		9.24736	5531847		9.23165	199164		9.23165	4.26183e+06
9.25906	0		9.25906	4832760		9.24351	149990		9.24351	3.64513e+06
9.27082	0		9.27082	4.37144e+06		9.25513	143853		9.25513	3373945
9.28256	0		9.28256	3.66938e+06		9.26761	123155		9.26761	3178873
9.29431	0		9.29431	3.03382e+06		9.27933	105381		9.27933	2907080
9.30589	0		9.30589	2.69217e+06		9.29102	71426.5		9.29102	2.41627e+06
9.31771	0		9.31771	2.03255e+06		9.30267	68190.9		9.30267	2.09548e+06
9.32949	0		9.32949	1692334		9.31443	60316.5		9.31443	1696495
9.34097	0		9.34097	1.30876e+06		9.32613	46712.4		9.32613	1.564e+06
9.35279	0		9.35279	1.17631e+06		9.33791	28498.7		9.33791	1.23041e+06
9.36459	0		9.36459	951841		9.34966	30756.6		9.34966	1062044
9.3764	0		9.3764	755632		9.36143	30981.1		9.36143	783622
9.3882	0		9.3882	528000		9.37323	23521		9.37323	664115
9.40005	0		9.40005	499879		9.38505	22276.4		9.38505	567516
9.4119	0		9.4119	336363		9.39668	19192		9.39668	474748
9.42328	0		9.42328	272148		9.4085	21408.2		9.4085	398852
9.43512	0		9.43512	231516		9.42032	11325.9		9.42032	288029
9.44651	0		9.44651	180325		9.43214	0		9.43214	247107
9.45834	0		9.45834	249965		9.44378	0		9.44378	205349
9.47017	0		9.47017	162381		9.45565	0		9.45565	224325
9.48199	0		9.48199	143124		9.46746	0		9.46746	200840
9.49381	0		9.49381	137146		9.47908	0		9.47908	163885
9.50565	0		9.50565	176657		9.49075	0		9.49075	112536
9.51716	0		9.51716	111527		9.50262	0		9.50262	118007
9.52901	0		9.52901	140762		9.51447	0		9.51447	119152
9.54089	0		9.54089	138267		9.52634	0		9.52634	90985
9.55274	0		9.55274	110736		9.53821	0		9.53821	86905.7
9.56459	0		9.56459	89507		9.55005	5236.77		9.55005	76260.9
9.57648	0		9.57648	95206.6		9.56194	4718.33		9.56194	57664.2
9.58833	0		9.58833	96425.6		9.57385	0		9.57385	73185.4
9.60004	0		9.60004	82651		9.58577	4193.14		9.58577	60505.6
9.61185	0		9.61185	83751.4		9.59767	3550.67		9.59767	49969.3
9.62375	0		9.62375	63722		9.60966	3285.28		9.60966	45174.9
9.63566	0		9.63566	60686.2		9.62163	0		9.62163	58641
9.64756	0		9.64756	51949.5		9.63352	0		9.63352	33420.2
9.65944	0		9.65944	46612.3		9.64554	0		9.64554	33308.3
9.67141	0		9.67141	38899.9		9.65747	0		9.65747	36381.3
9.6833	0		9.6833	46733.6		9.66938	0		9.66938	21873.9
9.69528	0		9.69528	43353.6		9.68101	0		9.68101	36019.9
9.70715	0		9.70715	37910.6		9.69306	1524.79		9.69306	20163
9.71917	0		9.71917	26628		9.70487	1494.1		9.70487	11433.1
9.73094	0		9.73094	41108.5		9.7167	0		9.7167	27100.1
9.74366	0		9.74366	29947		9.72852	0		9.72852	17623.1
9.75549	0		9.75549	27438.8		9.74034	0		9.74034	19128.5
9.7684	0		9.7684	21040.2		9.75216	0		9.75216	26701
9.78023	0		9.78023	23858.5		9.76398	0		9.76398	15741.1
9.79207	0		9.79207	26612.3		9.7758	0		9.7758	17458.4
9.80391	0		9.80391	19232.1		9.78761	0		9.78761	12398.7
9.81573	0		9.81573	27368.8		9.79944	0		9.79944	13747.7
9.82747	0		9.82747	22814.3		9.81126	0		9.81126	11258.1
9.83937	0		9.83937	14300.1		9.8231	0		9.8231	17442.8
9.85119	0		9.85119	22740.4		9.83493	1093.31		9.83493	15635.8
9.86301	0		9.86301	16793.8		9.84675	0		9.84675	8142.22
9.87483	0		9.87483	19851.8		9.85857	0		9.85857	12605.4
9.88665	0		9.88665	14903.8		9.8704	0		9.8704	13325.6
9.89847	0		9.89847	22706.9		9.88222	0		9.88222	11512.7
9.91137	0		9.91137	16616.8		9.89404	0		9.89404	7533.25
9.92318	0		9.92318	15986.3		9.90586	0		9.90586	11077.8
9.935	0		9.935	12076.2		9.91768	0		9.91768	8256.77
9.94682	0		9.94682	13692.7		9.9295	0		9.9295	8031.15
9.95864	0		9.95864	13316.7		9.94132	0		9.94132	10946.1
9.97046	0		9.97046	12494.6		9.95314	0		9.95314	6422.57
9.98228	0		9.98228	8303.14		9.96496	0		9.96496	5634.54
9.99411	0		9.99411	16184.2		9.97679	0		9.97679	9843.64
10.0059	0		10.0059	11212.5		9.98862	0		9.98862	7677.26
10.0177	0		10.0177	10695.8		10.0005	0		10.0005	7682.26
10.0296	0		10.0296	16629.9		10.0123	0		10.0123	9669.18
10.0414	0		10.0414	9535.19		10.0241	0		10.0241	7985.84
10.0532	0		10.0532	12740		10.0359	0		10.0359	5185.13
10.065	0		10.065	8800.34		10.0477	0		10.0477	10432.1
10.0769	0		10.0769	11237.9		10.0596	0		10.0596	8474.53
10.0887	0		10.0887	13196.8		10.0714	0		10.0714	11059.7
10.1005	0		10.1005	9029.71		10.0832	0		10.0832	5668.09
10.1123	0		10.1123	12262.4		10.095	0		10.095	9535.78
10.1241	0		10.1241	7668.27		10.1069	0		10.1069	9681.14
10.136	0		10.136	9322.63		10.1187	0		10.1187	4187.02
10.1478	0		10.1478	7446.69		10.1307	0		10.1307	4432.89
10.1596	0		10.1596	7756.7		10.1425	0		10.1425	3697.87
10.1714	0		10.1714	7414.24		10.1543	0		10.1543	6477.24
10.1832	0		10.1832	12193.2		10.1661	0		10.1661	7924.76
10.1951	0		10.1951	9469.25		10.178	0		10.178	1750.01
10.2069	0		10.2069	6529.04		10.1898	0		10.1898	4164.04
10.2187	0		10.2187	6837.53		10.2016	0		10.2016	4066.23
10.2305	0		10.2305	8089.13		10.2135	0		10.2135	7451.36
10.2424	0		10.2424	5413.78		10.2253	0		10.2253	4112.89
10.2542	0		10.2542	5141.9		10.2371	0		10.2371	4329.66
10.266	0		10.266	5618.32		10.2489	0		10.2489	5726.13
10.2778	0		10.2778	8170.27		10.2608	0		10.2608	7925.72
10.2896	0		10.2896	8398.88		10.2726	0		10.2726	1857.14
10.3025	0		10.3025	5490.63		10.2844	0		10.2844	5100.18
10.3143	0		10.3143	6217.96		10.2962	1042.51		10.2962	1995.01
10.3262	0		10.3262	6582.65		10.308	0		10.308	11834
10.338	0		10.338	4317.99		10.3199	0		10.3199	4604.74
10.3498	0		10.3498	5665.24		10.3317	0		10.3317	4378.16
10.3616	0		10.3616	5414.79		10.3435	0		10.3435	5005.62
10.3735	0		10.3735	5884.43		10.3553	0		10.3553	1149.67
10.3853	0		10.3853	8052.41		10.3672	0		10.3672	4106.32
10.3971	0		10.3971	3310.99		10.379	0		10.379	1309.07
10.4089	0		10.4089	5629.04		10.3908	0		10.3908	0
10.4208	0		10.4208	4286.79		10.4026	0		10.4026	1868.13
10.4326	0		10.4326	4198.67		10.4144	0		10.4144	6932.73
10.4444	0		10.4444	6206.91		10.4263	0		10.4263	5481.5
10.4562	0		10.4562	1772.69		10.4381	0		10.4381	3772.83
10.4681	0		10.4681	7137.66		10.451	0		10.451	3501.67
10.4799	0		10.4799	4169.8		10.4628	0		10.4628	1771.44
10.4917	0		10.4917	6673.35		10.4746	0		10.4746	5090.3
10.5035	0		10.5035	3550.1		10.4865	0		10.4865	5878.78
10.5153	0		10.5153	5739.78		10.4983	0		10.4983	1688.29
10.5272	0		10.5272	6408.25		10.5101	0		10.5101	2347.19
10.539	0		10.539	5678.44		10.5219	0		10.5219	3916
10.5508	0		10.5508	4496.02		10.5337	0		10.5337	4156.1
10.5627	0		10.5627	4360.61		10.5456	0		10.5456	3450.86
10.5745	0		10.5745	7945.56		10.5574	0		10.5574	3956.08
10.5863	0		10.5863	4829.26		10.5692	0		10.5692	5899.58
10.5981	0		10.5981	6507.43		10.5821	0		10.5821	4027.41
10.6099	0		10.6099	6880.39		10.5939	0		10.5939	1906.6
10.6218	0		10.6218	1707.64		10.6057	0		10.6057	5537.41
10.6336	0		10.6336	9582.87		10.6175	0		10.6175	4098.16
10.6454	0		10.6454	4728.64		10.6294	0		10.6294	0
10.6572	0		10.6572	6224.94		10.6412	0		10.6412	3939.77
10.669	0		10.669	5887.61		10.653	0		10.653	4499.66
10.6809	0		10.6809	5098.18		10.6648	0		10.6648	1881.12
10.6927	0		10.6927	5061.42		10.6767	0		10.6767	1730.46
10.7056	0		10.7056	2836.59		10.6885	0		10.6885	4924.94
10.7174	0		10.7174	3654.92		10.7014	0		10.7014	4013.85
10.7292	0		10.7292	4494.85		10.7132	0		10.7132	4174.96
10.7421	0		10.7421	4297.5		10.725	0		10.725	5354.33
10.7539	0		10.7539	1855.54		10.7369	0		10.7369	4324.44
10.7668	0		10.7668	4886.29		10.7487	0		10.7487	4309.34
10.7784	0		10.7784	2834.75		10.7616	0		10.7616	4089.43
10.7901	0		10.7901	2367.87		10.7745	0		10.7745	2403.84
10.8018	0		10.8018	7027.29		10.7863	0		10.7863	4293.86
10.8141	0		10.8141	2240.9		10.7981	0		10.7981	1632.91
10.8258	0		10.8258	3325.87		10.8108	0		10.8108	1531.07
10.8378	0		10.8378	9233.87		10.8235	0		10.8235	2221.69
10.8496	0		10.8496	2385.61		10.8361	0		10.8361	0
10.8615	0		10.8615	0		10.8486	0		10.8486	7104.51
10.8733	0		10.8733	6866.37		10.8603	0		10.8603	2810.22
10.8851	0		10.8851	4262.97		10.8727	0		10.8727	3232.1
10.8968	0		10.8968	0		10.8844	0		10.8844	0
10.9085	0		10.9085	15225.6		10.8966	0		10.8966	0
10.9201	0		10.9201	0		10.9087	0		10.9087	2660.96
10.9317	0		10.9317	0		10.9205	0		10.9205	0
10.9433	0		10.9433	4762.9		10.9323	0		10.9323	2463.16
10.9551	0		10.9551	0		10.944	0		10.944	0
10.9669	0		10.9669	8003.57		10.9558	0		10.9558	3113.16
10.9784	0		10.9784	0		10.9677	0		10.9677	3975.53
10.9902	0		10.9902	0		10.9796	0		10.9796	0
11.0017	0		11.0017	0		10.9914	0		10.9914	0
11.0136	0		11.0136	0		11.0033	0		11.0033	0
11.0251	0		11.0251	0		11.0151	0		11.0151	2754.88
11.0369	0		11.0369	0		11.0269	0		11.0269	0
11.0488	0		11.0488	0		11.0387	0		11.0387	2944.22
11.0603	0		11.0603	0		11.0505	0		11.0505	0
11.0718	0		11.0718	0		11.0623	0		11.0623	4846.37
11.0836	0		11.0836	0		11.0742	0		11.0742	0
11.0954	0		11.0954	0		11.0861	0		11.0861	0
11.1069	0		11.1069	0		11.0979	0		11.0979	5745.29
11.1184	0		11.1184	6632.17		11.1099	0		11.1099	2422.85
11.1302	0		11.1302	0		11.1217	0		11.1217	0
11.1417	0		11.1417	0		11.1337	0		11.1337	0
11.1532	0		11.1532	0		11.1456	0		11.1456	0
11.1647	0		11.1647	0		11.1576	0		11.1576	0
11.1763	0		11.1763	0		11.1694	0		11.1694	0
11.1878	0		11.1878	0		11.1812	0		11.1812	0
11.1996	0		11.1996	0		11.1931	0		11.1931	0
11.2115	0		11.2115	0		11.2051	0		11.2051	0
11.2233	0		11.2233	0		11.2169	0		11.2169	2586.89
11.2352	0		11.2352	0		11.229	0		11.229	2678.55
11.247	0		11.247	5878.65		11.2409	0		11.2409	0
11.2589	0		11.2589	6641.48		11.2528	0		11.2528	1950.67
11.2707	0		11.2707	0		11.2649	0		11.2649	0
11.2825	0		11.2825	4656.88		11.2768	0		11.2768	0
11.2943	0		11.2943	0		11.289	0		11.289	0
11.3062	0		11.3062	0		11.3007	0		11.3007	0
11.3181	0		11.3181	0		11.3125	0		11.3125	0
11.33	0		11.33	0		11.3242	0		11.3242	2782.85
11.3418	0		11.3418	0		11.3361	0		11.3361	0
11.3538	0		11.3538	3618.26		11.3478	0		11.3478	0
11.3657	0		11.3657	0		11.3597	0		11.3597	0
11.3777	0		11.3777	0		11.3715	0		11.3715	0
11.3895	0		11.3895	2930.91		11.3833	0		11.3833	0
11.4014	0		11.4014	0		11.3951	0		11.3951	0
11.4133	0		11.4133	2310.54		11.4069	0		11.4069	0
11.425	0		11.425	0		11.4187	0		11.4187	0
11.4368	0		11.4368	0		11.4305	0		11.4305	0
11.4486	0		11.4486	3395.72		11.4421	0		11.4421	0
11.4602	0		11.4602	0		11.454	0		11.454	0
11.472	0		11.472	0		11.4655	0		11.4655	3904.57
11.4835	0		11.4835	4964.62		11.4774	0		11.4774	0
11.495	0		11.495	0		11.4892	0		11.4892	0
11.5068	0		11.5068	0		11.501	0		11.501	0
11.5183	0		11.5183	0		11.5128	0		11.5128	0
11.5297	0		11.5297	0		11.5246	0		11.5246	0
11.5411	0		11.5411	0		11.5364	0		11.5364	0
11.5525	0		11.5525	0		11.5483	0		11.5483	0
11.5639	0		11.5639	0		11.5601	0		11.5601	4466.78
11.5753	0		11.5753	0		11.572	0		11.572	0
11.5871	0		11.5871	0		11.5836	0		11.5836	0
11.5985	0		11.5985	0		11.5953	0		11.5953	0
11.6104	0		11.6104	0		11.6071	0		11.6071	0
11.6222	0		11.6222	0		11.6187	0		11.6187	0
11.634	0		11.634	0		11.6305	0		11.6305	0
11.6458	0		11.6458	0		11.6422	0		11.6422	0
11.6572	0		11.6572	0		11.654	0		11.654	0
11.6691	0		11.6691	0		11.6659	0		11.6659	0
11.6809	0		11.6809	0		11.6777	0		11.6777	0
11.6928	0		11.6928	0		11.6896	0		11.6896	0
11.7046	0		11.7046	0		11.7014	0		11.7014	0
11.716	0		11.716	0		11.7134	0		11.7134	0
11.7279	0		11.7279	0		11.7252	0		11.7252	2618.46
11.7397	0		11.7397	0		11.7372	0		11.7372	0
11.7511	0		11.7511	9365.87		11.7491	0		11.7491	0
11.763	0		11.763	0		11.761	0		11.761	0
11.7744	0		11.7744	0		11.7728	0		11.7728	0
11.7863	0		11.7863	0		11.7851	0		11.7851	2535.2
11.7978	0		11.7978	0		11.7969	0		11.7969	0
11.8096	0		11.8096	0		11.8088	0		11.8088	0
11.8211	0		11.8211	0		11.8206	0		11.8206	0
11.8329	0		11.8329	0		11.8325	0		11.8325	0
11.8444	0		11.8444	0		11.8449	0		11.8449	0
11.8559	0		11.8559	0		11.8567	0		11.8567	1718.7
11.8674	0		11.8674	0		11.8686	0		11.8686	0
11.8792	0		11.8792	0		11.8803	0		11.8803	0
11.8911	0		11.8911	6902.68		11.8922	0		11.8922	0
11.9026	0		11.9026	0		11.9041	0		11.9041	0
11.9144	0		11.9144	0		11.916	0		11.916	1420.59
11.9263	0		11.9263	0		11.9277	0		11.9277	0
11.9381	0		11.9381	0		11.9396	0		11.9396	0
11.95	0		11.95	0		11.9515	0		11.9515	1148.51
11.9616	0		11.9616	0		11.9643	0		11.9643	1737.46
11.9734	0		11.9734	0		11.977	0		11.977	1199.81
11.9853	0		11.9853	0		11.989	0		11.989	1896.93
11.9969	0		11.9969	0		12.0007	0		12.0007	0
12.0087	0		12.0087	0		12.0126	0		12.0126	1512.02
12.0204	0		12.0204	0		12.0245	0		12.0245	0
12.0323	0		12.0323	3401.04		12.0363	0		12.0363	1159.71
12.0441	0		12.0441	0		12.0481	0		12.0481	0
12.056	0		12.056	0		12.0599	0		12.0599	1636.28
12.0678	0		12.0678	0		12.0717	0		12.0717	1106.57
12.0797	0		12.0797	0		12.0846	0		12.0846	0
12.0915	0		12.0915	0		12.0975	0		12.0975	1088.92
12.1034	0		12.1034	0		12.1094	0		12.1094	0
12.1153	0		12.1153	0		12.1212	0		12.1212	0
12.1272	0		12.1272	4797.03		12.133	0		12.133	1902.18
12.1392	0		12.1392	0		12.1448	0		12.1448	0
12.151	0		12.151	0		12.1567	0		12.1567	0
12.1629	0		12.1629	0		12.1695	0		12.1695	0
12.1747	0		12.1747	0		12.1814	0		12.1814	1639.43
12.1866	0		12.1866	2604.8		12.1932	0		12.1932	1895.28
12.1985	0		12.1985	0		12.205	0		12.205	1616.77
12.2105	0		12.2105	0		12.2168	0		12.2168	0
12.2223	0		12.2223	1985.6		12.2287	0		12.2287	0
12.2342	0		12.2342	1976.75		12.2405	0		12.2405	0
12.246	0		12.246	1548.61		12.2523	0		12.2523	1643.65
12.2579	0		12.2579	0		12.2641	0		12.2641	0
12.2698	0		12.2698	0		12.276	0		12.276	0
12.2817	0		12.2817	2339.14		12.2878	0		12.2878	0
12.2937	0		12.2937	2355.93		12.2996	0		12.2996	1265.07
12.3055	0		12.3055	0		12.3125	0		12.3125	0
12.3175	0		12.3175	0		12.3243	0		12.3243	1415.25
12.3293	0		12.3293	1939.21		12.3361	0		12.3361	0
12.3411	0		12.3411	4406.99		12.348	0		12.348	1182.4
12.353	0		12.353	1562.2		12.3598	0		12.3598	1348.88
12.3648	0		12.3648	0		12.3716	0		12.3716	0
12.3766	0		12.3766	0		12.3834	0		12.3834	0
12.3884	0		12.3884	0		12.3953	0		12.3953	0
12.4003	0		12.4003	1465.43		12.4071	0		12.4071	0
12.4121	0		12.4121	1378.34		12.4189	0		12.4189	1618.96
12.4239	0		12.4239	0		12.4307	0		12.4307	973.654
12.4357	0		12.4357	0		12.4425	0		12.4425	1201.54
12.4475	0		12.4475	1764.5		12.4544	0		12.4544	1067.26
12.4593	0		12.4593	1132.6		12.4662	0		12.4662	0
12.4712	0		12.4712	0		12.478	0		12.478	0
12.483	0		12.483	0		12.4898	0		12.4898	0
12.4948	0		12.4948	0		12.5016	0		12.5016	1209.37
12.5066	0		12.5066	1149.3		12.5135	0		12.5135	0
12.5185	0		12.5185	0		12.5253	0		12.5253	1204.95
12.5303	0		12.5303	1595.3		12.5371	0		12.5371	0
12.5421	0		12.5421	0		12.5489	0		12.5489	0
12.5539	0		12.5539	0		12.5607	0		12.5607	0
12.5658	0		12.5658	0		12.5726	0		12.5726	1086.16
12.5787	0		12.5787	0		12.5844	0		12.5844	1521.23
12.5905	0		12.5905	1132.62		12.5962	0		12.5962	3645.59
12.6023	0		12.6023	1742.76		12.608	0		12.608	0
12.6141	0		12.6141	1720.85		12.6209	0		12.6209	1065.24
12.626	0		12.626	1483.49		12.6327	0		12.6327	0
12.6378	0		12.6378	1562.75		12.6445	0		12.6445	0
12.6496	0		12.6496	0		12.6564	0		12.6564	1724.3
12.6614	0		12.6614	1346.8		12.6682	0		12.6682	0
12.6743	0		12.6743	0		12.68	0		12.68	1438.97
12.6861	0		12.6861	1548.36		12.6918	0		12.6918	0
12.698	0		12.698	1253.62		12.7037	0		12.7037	0
12.7098	0		12.7098	1684.33		12.7155	0		12.7155	0
12.7216	0		12.7216	1152.5		12.7273	0		12.7273	0
12.7334	0		12.7334	0		12.7391	0		12.7391	1026.01
12.7452	0		12.7452	3950.05		12.751	0		12.751	0
12.757	0		12.757	1825.79		12.7628	0		12.7628	0
12.7689	0		12.7689	2126.64		12.7746	0		12.7746	1665.51
12.7807	0		12.7807	1007.54		12.7864	0		12.7864	0
12.7925	0		12.7925	0		12.7982	0		12.7982	0
12.8043	0		12.8043	2025.34		12.8101	0		12.8101	1250.65
12.8162	0		12.8162	1559.7		12.8219	0		12.8219	0
12.828	0		12.828	1283.45		12.8337	0		12.8337	0
12.8409	0		12.8409	1487.47		12.8455	0		12.8455	1330.64
12.8527	0		12.8527	959.786		12.8573	0		12.8573	0
12.8645	0		12.8645	1832.04		12.8692	0		12.8692	0
12.8764	0		12.8764	1979.96		12.881	0		12.881	1412.01
12.8882	0		12.8882	1373.99		12.8928	0		12.8928	1662.9
12.9	0		12.9	1215.81		12.9046	0		12.9046	0
12.9118	0		12.9118	0		12.9164	0		12.9164	1160.07
12.9247	0		12.9247	0		12.9283	0		12.9283	1060.71
12.9366	0		12.9366	0		12.9401	0		12.9401	926.232
12.9484	0		12.9484	1869.03		12.9519	0		12.9519	1495
12.9602	0		12.9602	1315.27		12.9637	0		12.9637	1706.23
12.972	0		12.972	1040.09		12.9755	0		12.9755	0
12.9839	0		12.9839	1190.62		12.9874	0		12.9874	0
12.9957	0		12.9957	4069.25		12.9992	0		12.9992	1203.5
13.0075	0		13.0075	1782.65		13.011	0		13.011	1178.29
13.0193	0		13.0193	1429.07		13.0228	0		13.0228	822.541
13.0312	0		13.0312	1087.6		13.0357	0		13.0357	0
13.043	0		13.043	0		13.0476	0		13.0476	1537.06
13.0548	0		13.0548	0		13.0594	0		13.0594	0
13.0666	0		13.0666	1879.93		13.0712	0		13.0712	0
13.0784	0		13.0784	0		13.083	0		13.083	1195.68
13.0902	0		13.0902	0		13.0948	0		13.0948	1220.38
13.1021	0		13.1021	2757.45		13.1067	0		13.1067	0
13.1139	0		13.1139	1232.58		13.1185	0		13.1185	0
13.1268	0		13.1268	1752.19		13.1303	0		13.1303	1127.16
13.1386	0		13.1386	0		13.1421	0		13.1421	0
13.1504	0		13.1504	1581.87		13.1539	0		13.1539	0
13.1622	0		13.1622	1239.59		13.1658	0		13.1658	1883.77
13.1741	0		13.1741	1757.36		13.1776	0		13.1776	1728.53
13.1859	0		13.1859	1829.86		13.1894	0		13.1894	0
13.1977	0		13.1977	1352.62		13.2012	0		13.2012	0
13.2095	0		13.2095	1181.39		13.2131	0		13.2131	2078.63
13.2224	0		13.2224	1443.44		13.226	0		13.226	0
13.2342	0		13.2342	0		13.2378	0		13.2378	1222.43
13.2461	0		13.2461	992.15		13.2496	0		13.2496	0
13.2579	0		13.2579	1004.65		13.2616	0		13.2616	0
13.2697	0		13.2697	1299.44		13.2734	0		13.2734	1331.29
13.2816	0		13.2816	991.236		13.2852	0		13.2852	0
13.2934	0		13.2934	1628.2		13.2971	0		13.2971	1309.16
13.3052	0		13.3052	1113.37		13.3089	0		13.3089	0
13.317	0		13.317	1487.12		13.3207	0		13.3207	0
13.3288	0		13.3288	1853.5		13.3326	0		13.3326	0
13.3407	0		13.3407	0		13.3454	0		13.3454	1469.5
13.3525	0		13.3525	1647.13		13.3572	0		13.3572	0
13.3643	0		13.3643	1285.84		13.3691	0		13.3691	0
13.3772	0		13.3772	1076.54		13.3809	0		13.3809	0
13.389	0		13.389	0		13.3927	0		13.3927	1422.66
13.4008	0		13.4008	0		13.4046	0		13.4046	0
13.4127	0		13.4127	0		13.4164	0		13.4164	0
13.4245	0		13.4245	0		13.4293	0		13.4293	0
13.4363	0		13.4363	946.045		13.4411	0		13.4411	1150.51
13.4481	0		13.4481	1872.11		13.4529	0		13.4529	0
13.46	0		13.46	1815.31		13.4648	0		13.4648	0
13.4718	0		13.4718	1086.25		13.4766	0		13.4766	0
13.4836	0		13.4836	0		13.4884	0		13.4884	1283.38
13.4954	0		13.4954	0		13.5002	0		13.5002	0
13.5072	0		13.5072	0		13.512	0		13.512	1784.78
13.5191	0		13.5191	1810.92		13.5239	0		13.5239	0
13.5309	0		13.5309	0		13.5357	0		13.5357	3752.29
13.5427	0		13.5427	1420.05		13.5475	0		13.5475	0
13.5546	0		13.5546	824.855		13.5593	0		13.5593	0
13.5664	0		13.5664	1230.33		13.5722	0		13.5722	1666.57
13.5782	0		13.5782	0		13.584	0		13.584	0
13.59	0		13.59	0		13.5958	0		13.5958	1347.03
13.6019	0		13.6019	0		13.6077	0		13.6077	0
13.6137	0		13.6137	964.396		13.6195	0		13.6195	0
13.6255	0		13.6255	1106.44		13.6313	0		13.6313	0
13.6373	0		13.6373	0		13.6431	0		13.6431	0
13.6491	0		13.6491	884.234		13.6549	0		13.6549	1172.38
13.6609	0		13.6609	1095.21		13.6679	0		13.6679	0
13.6728	0		13.6728	0		13.6797	0		13.6797	0
13.6846	0		13.6846	1619.89		13.6915	0		13.6915	0
13.6964	0		13.6964	0		13.7033	0		13.7033	0
13.7083	0		13.7083	0		13.7151	0		13.7151	0
13.7201	0		13.7201	0		13.727	0		13.727	0
13.7319	0		13.7319	1285.95		13.7388	0		13.7388	1856.96
13.7437	0		13.7437	0		13.7506	0		13.7506	0
13.7555	0		13.7555	1562.27		13.7624	0		13.7624	0
13.7674	0		13.7674	1239.59		13.7742	0		13.7742	0
13.7792	0		13.7792	1392.87		13.7861	0		13.7861	0
13.791	0		13.791	0		13.7979	0		13.7979	1085.9
13.8028	0		13.8028	1473.55		13.8097	0		13.8097	0
13.8146	0		13.8146	0		13.8215	0		13.8215	0
13.8265	0		13.8265	0		13.8334	0		13.8334	0
13.8393	0		13.8393	0		13.8452	0		13.8452	0
13.8512	0		13.8512	0		13.857	0		13.857	0
13.863	0		13.863	0		13.8688	0		13.8688	0
13.8748	0		13.8748	1433.6		13.8817	0		13.8817	0
13.8866	0		13.8866	1136.45		13.8935	0		13.8935	993.725
13.8985	0		13.8985	1159.79		13.9053	0		13.9053	0
13.9103	0		13.9103	0		13.9172	0		13.9172	0
13.9221	0		13.9221	1311.24		13.929	0		13.929	0
13.9339	0		13.9339	0		13.9408	0		13.9408	0
13.9468	0		13.9468	0		13.9526	0		13.9526	0
13.9586	0		13.9586	1045.51		13.9645	0		13.9645	0
13.9705	0		13.9705	0		13.9763	0		13.9763	0
13.9823	0		13.9823	1142.01		13.9881	0		13.9881	0
13.9941	0		13.9941	1216.92		13.9999	0		13.9999	0
14.0059	0		14.0059	934.139		14.0117	0		14.0117	1150.61
14.0178	0		14.0178	0		14.0235	0		14.0235	0
14.0296	0		14.0296	1143.81		14.0354	0		14.0354	1405.9
14.0414	0		14.0414	1266.49		14.0472	0		14.0472	0
14.0532	0		14.0532	0		14.059	0		14.059	0
14.0651	0		14.0651	0		14.0708	0		14.0708	0
14.0769	0		14.0769	0		14.0826	0		14.0826	0
14.0887	0		14.0887	1065.53		14.0945	0		14.0945	0
14.1005	0		14.1005	0		14.1063	0		14.1063	1316.42
14.1123	0		14.1123	1229.1		14.1181	0		14.1181	0
14.1242	0		14.1242	0		14.13	0		14.13	0
14.136	0		14.136	0		14.1418	0		14.1418	0
14.1478	0		14.1478	3239.87		14.1536	0		14.1536	0
14.1596	0		14.1596	0		14.1654	0		14.1654	0
14.1714	0		14.1714	0		14.1773	0		14.1773	1340.59
14.1833	0		14.1833	1557.2		14.1891	0		14.1891	0
14.1951	0		14.1951	0		14.2009	0		14.2009	1187.52
14.2069	0		14.2069	0		14.2127	0		14.2127	1351.7
14.2188	0		14.2188	0		14.2245	0		14.2245	1115.15
14.2306	0		14.2306	0		14.2364	0		14.2364	0
14.2424	0		14.2424	0		14.2482	0		14.2482	0
14.2542	0		14.2542	994.809		14.26	0		14.26	0
14.266	0		14.266	1342.41		14.2718	0		14.2718	0
14.2779	0		14.2779	1362.85		14.2836	0		14.2836	0
14.2897	0		14.2897	0		14.2955	0		14.2955	0
14.3015	0		14.3015	0		14.3073	0		14.3073	0
14.3133	0		14.3133	0		14.3191	0		14.3191	0
14.3251	0		14.3251	970.551		14.3309	0		14.3309	0
14.337	0		14.337	0		14.3428	0		14.3428	1038.67
14.3488	0		14.3488	0		14.3546	0		14.3546	0
14.3606	0		14.3606	1507.91		14.3664	0		14.3664	0
14.3724	0		14.3724	912.874		14.3782	0		14.3782	0
14.3853	0		14.3853	0		14.39	0		14.39	0
14.3972	0		14.3972	0		14.4019	0		14.4019	1164.06
14.409	0		14.409	810.995		14.4137	0		14.4137	0
14.4208	0		14.4208	0		14.4255	0		14.4255	0
14.4326	0		14.4326	828.994		14.4373	0		14.4373	0
14.4444	0		14.4444	0		14.4492	0		14.4492	0
14.4563	0		14.4563	1034.3		14.461	0		14.461	0
14.4681	0		14.4681	0		14.4728	0		14.4728	0
14.481	0		14.481	1390.86		14.4857	0		14.4857	0
14.4928	0		14.4928	1274.98		14.4975	0		14.4975	0
14.5047	0		14.5047	0		14.5094	0		14.5094	0
14.5165	0		14.5165	0		14.5212	0		14.5212	0
14.5283	0		14.5283	0		14.533	0		14.533	0
14.5401	0		14.5401	963.641		14.5448	0		14.5448	0
14.5531	0		14.5531	0		14.5567	0		14.5567	0
14.5649	0		14.5649	1365.9		14.5685	0		14.5685	0
14.5767	0		14.5767	0		14.5803	0		14.5803	1149.3
14.5885	0		14.5885	0		14.5921	0		14.5921	0
14.6004	0		14.6004	0		14.605	0		14.605	0
14.6122	0		14.6122	0		14.6168	0		14.6168	0
14.624	0		14.624	1009.06		14.6287	0		14.6287	1100.19
14.6369	0		14.6369	0		14.6405	0		14.6405	1764.04
14.6487	0		14.6487	0		14.6523	0		14.6523	0
14.6606	0		14.6606	0		14.6641	0		14.6641	0
14.6724	0		14.6724	0		14.676	0		14.676	1210.04
14.6842	0		14.6842	0		14.6889	0		14.6889	0
14.696	0		14.696	2138.47		14.7007	0		14.7007	0
14.7079	0		14.7079	974.969		14.7125	0		14.7125	0
14.7197	0		14.7197	0		14.7243	0		14.7243	1566.52
14.7315	0		14.7315	1746.36		14.7362	0		14.7362	0
14.7433	0		14.7433	1396.71		14.748	0		14.748	0
14.7552	0		14.7552	0		14.7598	0		14.7598	0
14.767	0		14.767	1871.44		14.7716	0		14.7716	0
14.7788	0		14.7788	0		14.7834	0		14.7834	0
14.7906	0		14.7906	1351.79		14.7953	0		14.7953	0
14.8024	0		14.8024	0		14.8071	0		14.8071	0
14.8143	0		14.8143	1512.92		14.8189	0		14.8189	0
14.8261	0		14.8261	1102.07		14.8307	0		14.8307	0
14.8379	0		14.8379	0		14.8425	0		14.8425	1368.49
14.8497	0		14.8497	0		14.8544	0		14.8544	0
14.8615	0		14.8615	1569.69		14.8662	0		14.8662	0
14.8734	0		14.8734	1132.3		14.878	0		14.878	0
14.8852	0		14.8852	0		14.8898	0		14.8898	0
14.897	0		14.897	0		14.9017	0		14.9017	0
14.9088	0		14.9088	929.64		14.9135	0		14.9135	0
14.9206	0		14.9206	0		14.9253	0		14.9253	0
14.9325	0		14.9325	1272.83		14.9371	0		14.9371	0
14.9443	0		14.9443	975.549		14.949	0		14.949	0
14.9561	0		14.9561	1327.37		14.9618	0		14.9618	0
14.9679	0		14.9679	1596.2		14.9737	0		14.9737	0
14.9797	0		14.9797	1313.55		14.9855	0		14.9855	0
14.9915	0		14.9915	0		14.9973	0		14.9973	0
15.0034	0		15.0034	0		15.0091	0		15.0091	1068.23
15.0152	0		15.0152	1117.04		15.0209	0		15.0209	0
15.027	0		15.027	0		15.0327	0		15.0327	0
15.0389	0		15.0389	1079.1		15.0446	0		15.0446	0
15.0507	0		15.0507	0		15.0564	0		15.0564	0
15.0625	0		15.0625	0		15.0682	0		15.0682	1149.92
15.0743	0		15.0743	1222.24		15.08	0		15.08	946.926
15.0861	0		15.0861	1257.36		15.0919	0		15.0919	0
15.0991	0		15.0991	1479.76		15.1037	0		15.1037	1281.42
15.1109	0		15.1109	1754.41		15.1155	0		15.1155	0
15.1227	0		15.1227	0		15.1273	0		15.1273	0
15.1345	0		15.1345	0		15.1402	0		15.1402	0
15.1463	0		15.1463	959.988		15.152	0		15.152	0
15.1582	0		15.1582	1360.62		15.1639	0		15.1639	0
15.17	0		15.17	0		15.1757	0		15.1757	0
15.1818	0		15.1818	0		15.1875	0		15.1875	0
15.1936	0		15.1936	1336.84		15.1994	0		15.1994	0
15.2065	0		15.2065	0		15.2112	0		15.2112	1278.22
15.2183	0		15.2183	1367.04		15.223	0		15.223	0
15.2302	0		15.2302	0		15.2348	0		15.2348	0
15.242	0		15.242	1556.18		15.2466	0		15.2466	0
15.2538	0		15.2538	1281.39		15.2585	0		15.2585	0
15.2656	881.508		15.2656	964.234		15.2703	0		15.2703	0
15.2774	0		15.2774	0		15.2821	0		15.2821	0
15.2892	0		15.2892	0		15.2939	0		15.2939	0
15.3011	0		15.3011	0		15.3058	0		15.3058	0
15.3129	0		15.3129	1001.71		15.3176	0		15.3176	0
15.3247	0		15.3247	0		15.3294	0		15.3294	1009.25
15.3366	0		15.3366	1443.96		15.3412	0		15.3412	0
15.3484	0		15.3484	1145.16		15.353	0		15.353	0
15.3602	0		15.3602	0		15.3649	0		15.3649	0
15.372	0		15.372	0		15.3767	0		15.3767	0
15.3839	0		15.3839	1189.06		15.3885	0		15.3885	0
15.3957	0		15.3957	1135.28		15.4003	0		15.4003	0
15.4075	0		15.4075	0		15.4121	0		15.4121	0
15.4193	0		15.4193	0		15.424	0		15.424	0
15.4311	0		15.4311	1062.72		15.4358	0		15.4358	0
15.443	0		15.443	0		15.4476	0		15.4476	1214.58
15.4548	0		15.4548	0		15.4594	0		15.4594	0
15.4666	0		15.4666	2132.41		15.4712	0		15.4712	0
15.4784	0		15.4784	0		15.4831	0		15.4831	0
15.4902	0		15.4902	0		15.4949	0		15.4949	0
15.5021	0		15.5021	1035.89		15.5067	0		15.5067	1096.3
15.5139	0		15.5139	899.088		15.5185	0		15.5185	0
15.5258	0		15.5258	0		15.5303	0		15.5303	0
15.5376	0		15.5376	0		15.5422	0		15.5422	0
15.5494	0		15.5494	1145.1		15.554	0		15.554	0
15.5612	0		15.5612	0		15.5658	0		15.5658	0
15.573	0		15.573	0		15.5776	0		15.5776	0
15.5849	0		15.5849	963.295		15.5894	0		15.5894	0
15.5967	0		15.5967	1793.82		15.6013	0		15.6013	1471.56
15.6085	0		15.6085	0		15.6131	0		15.6131	0
15.6203	0		15.6203	0		15.6249	0		15.6249	0
15.6321	0		15.6321	0		15.6368	0		15.6368	1841.94
15.645	0		15.645	1159.11		15.6486	0		15.6486	0
15.6568	0		15.6568	1165.12		15.6604	0		15.6604	0
15.6686	0		15.6686	0		15.6722	0		15.6722	1506.43
15.6805	0		15.6805	1494.02		15.6841	0		15.6841	0
15.6923	0		15.6923	0		15.6959	0		15.6959	0
15.7041	0		15.7041	0		15.7077	0		15.7077	0
15.7159	0		15.7159	1342.65		15.7195	0		15.7195	0
15.7277	0		15.7277	866.827		15.7313	0		15.7313	0
15.7406	0		15.7406	0		15.7443	0		15.7443	0
15.7524	0		15.7524	0		15.7561	0		15.7561	1092.76
15.7643	0		15.7643	866.174		15.7679	0		15.7679	1187.43
15.7761	0		15.7761	0		15.7797	0		15.7797	0
15.7879	0		15.7879	1558.91		15.7916	0		15.7916	0
15.7997	0		15.7997	0		15.8034	0		15.8034	0
15.8116	0		15.8116	0		15.8152	0		15.8152	0
15.8234	0		15.8234	0		15.827	0		15.827	0
15.8352	0		15.8352	889.935		15.8389	0		15.8389	0
15.847	0		15.847	0		15.8507	0		15.8507	0
15.8588	0		15.8588	1144.51		15.8636	0		15.8636	0
15.8706	0		15.8706	0		15.8754	0		15.8754	0
15.8825	0		15.8825	0		15.8872	0		15.8872	0
15.8954	0		15.8954	0		15.899	0		15.899	0
15.9072	0		15.9072	959.133		15.9109	0		15.9109	1206.99
15.919	0		15.919	0		15.9237	0		15.9237	0
15.9308	0		15.9308	1341.6		15.9356	0		15.9356	0
15.9427	0		15.9427	1106.37		15.9484	0		15.9484	0
15.9545	0		15.9545	0		15.9603	0		15.9603	0
15.9663	0		15.9663	1050.5		15.9721	0		15.9721	0
15.9781	0		15.9781	0		15.9839	0		15.9839	0
15.99	0		15.99	0		15.9957	0		15.9957	0
16.0018	0		16.0018	1899.53		16.0076	0		16.0076	0
16.0136	0		16.0136	0		16.0194	0		16.0194	0
16.0265	0		16.0265	1219.28		16.0312	0		16.0312	0
16.0383	0		16.0383	1091.94		16.043	0		16.043	0
16.0501	0		16.0501	0		16.0548	0		16.0548	0
16.062	0		16.062	1138.96		16.0667	0		16.0667	0
16.0738	0		16.0738	0		16.0785	0		16.0785	0
16.0856	0		16.0856	0		16.0903	0		16.0903	1516.62
16.0974	0		16.0974	901.62		16.1022	0		16.1022	1355.79
16.1093	0		16.1093	0		16.1139	0		16.1139	0
16.1211	0		16.1211	0		16.1257	0		16.1257	0
16.1329	0		16.1329	0		16.1374	0		16.1374	0
16.1447	0		16.1447	0		16.1492	0		16.1492	0
16.1565	0		16.1565	0		16.1609	0		16.1609	0
16.1684	0		16.1684	0		16.1728	0		16.1728	0
16.1802	0		16.1802	1173.69		16.1846	0		16.1846	0
16.192	0		16.192	0		16.1971	0		16.1971	0
16.2038	0		16.2038	1189.43		16.2089	0		16.2089	0
16.2156	0		16.2156	1181.54		16.2213	0		16.2213	0
16.2275	0		16.2275	0		16.2338	0		16.2338	0
16.2393	0		16.2393	0		16.2455	0		16.2455	0
16.2511	0		16.2511	1109.71		16.2574	0		16.2574	0
16.263	0		16.263	1194.81		16.2691	0		16.2691	0
16.2748	0		16.2748	0		16.2809	0		16.2809	0
16.2866	0		16.2866	0		16.2927	0		16.2927	0
16.2984	0		16.2984	0		16.3045	0		16.3045	0
16.3102	0		16.3102	1226.11		16.3164	0		16.3164	0
16.3221	0		16.3221	0		16.3282	0		16.3282	0
16.3339	0		16.3339	1398.04		16.34	0		16.34	0
16.3457	0		16.3457	0		16.3519	0		16.3519	0
16.3585	0		16.3585	0		16.3637	0		16.3637	0
16.3713	0		16.3713	0		16.3756	0		16.3756	0
16.3831	0		16.3831	0		16.3875	0		16.3875	0
16.3949	0		16.3949	0		16.3999	0		16.3999	0
16.4067	0		16.4067	0		16.4117	0		16.4117	0
16.4186	0		16.4186	0		16.4236	0		16.4236	0
16.4305	0		16.4305	0		16.4354	0		16.4354	0
16.4422	0		16.4422	0		16.4474	0		16.4474	0
16.454	0		16.454	0		16.4592	0		16.4592	0
16.4669	0		16.4669	0		16.471	0		16.471	0
16.4787	0		16.4787	0		16.4829	0		16.4829	0
16.4905	0		16.4905	0		16.4947	0		16.4947	0
16.5024	0		16.5024	0		16.5066	0		16.5066	0
16.5142	0		16.5142	1592.66		16.5185	0		16.5185	0
16.526	0		16.526	0		16.5304	0		16.5304	0
16.5379	0		16.5379	0		16.5422	0		16.5422	0
16.5497	0		16.5497	0		16.554	0		16.554	0
16.5615	0		16.5615	0		16.5659	0		16.5659	0
16.5733	0		16.5733	1192.9		16.5777	0		16.5777	0
16.5851	0		16.5851	0		16.5896	0		16.5896	0
16.597	0		16.597	0		16.6014	0		16.6014	0
16.6088	0		16.6088	0		16.6132	0		16.6132	0
16.6206	0		16.6206	0		16.625	0		16.625	1255.4
16.6324	0		16.6324	0		16.6368	0		16.6368	0
16.6442	0		16.6442	0		16.6487	0		16.6487	1308.31
16.656	0		16.656	0		16.6605	0		16.6605	0
16.6679	0		16.6679	0		16.6723	0		16.6723	1142.14
16.6797	0		16.6797	0		16.6841	0		16.6841	0
16.6915	0		16.6915	1020.97		16.696	0		16.696	0
16.7033	0		16.7033	0		16.7078	0		16.7078	0
16.7152	0		16.7152	0		16.7196	0		16.7196	0
16.727	0		16.727	1054.05		16.7314	0		16.7314	0
16.7388	0		16.7388	0		16.7433	0		16.7433	0
16.7506	0		16.7506	0		16.7551	0		16.7551	0
16.7625	0		16.7625	0		16.7669	0		16.7669	0
16.7743	0		16.7743	1305.73		16.7787	0		16.7787	0
16.7861	0		16.7861	0		16.7905	0		16.7905	0
16.7979	0		16.7979	0		16.8024	0		16.8024	0
16.8097	0		16.8097	0		16.8142	0		16.8142	0
16.8215	0		16.8215	829.907		16.826	0		16.826	0
16.8334	0		16.8334	0		16.8378	0		16.8378	0
16.8452	0		16.8452	0		16.8497	0		16.8497	1359.88
16.857	0		16.857	1052.76		16.8615	0		16.8615	0
16.8689	0		16.8689	897.75		16.8733	0		16.8733	0
16.8807	0		16.8807	1108.54		16.8851	0		16.8851	0
16.8925	0		16.8925	1000.06		16.8969	0		16.8969	1417.55
16.9054	0		16.9054	0		16.9088	0		16.9088	0
16.9172	0		16.9172	0		16.9206	0		16.9206	0
16.929	0		16.929	0		16.9324	0		16.9324	0
16.9409	0		16.9409	0		16.9442	0		16.9442	0
16.9527	0		16.9527	0		16.9561	0		16.9561	0
16.9645	0		16.9645	0		16.9679	0		16.9679	0
16.9763	0		16.9763	0		16.9797	0		16.9797	0
16.9882	0		16.9882	0		16.9915	0		16.9915	0
17.001	0		17.001	0		17.0045	0		17.0045	0
17.0129	0		17.0129	0		17.0163	0		17.0163	1274.94
17.0247	0		17.0247	0		17.0281	0		17.0281	0
17.0365	0		17.0365	1278.81		17.0399	0		17.0399	0
17.0484	0		17.0484	1139.4		17.0517	0		17.0517	0
17.0602	0		17.0602	0		17.0636	0		17.0636	0
17.072	0		17.072	0		17.0754	0		17.0754	1372.6
17.0838	0		17.0838	953.934		17.0872	0		17.0872	0
17.0957	0		17.0957	0		17.099	0		17.099	0
17.1075	0		17.1075	0		17.1109	0		17.1109	0
17.1193	0		17.1193	0		17.1237	0		17.1237	0
17.1311	0		17.1311	0		17.1356	0		17.1356	0
17.1429	0		17.1429	1419.29		17.1474	0		17.1474	0
17.1548	0		17.1548	1169.01		17.1592	0		17.1592	0
17.1677	0		17.1677	1403.35		17.171	0		17.171	0
17.1795	0		17.1795	0		17.1829	0		17.1829	0
17.1913	0		17.1913	0		17.1947	0		17.1947	0
17.2031	0		17.2031	0		17.2076	0		17.2076	0
17.215	0		17.215	0		17.2194	0		17.2194	0
17.2268	0		17.2268	0		17.2312	0		17.2312	0
17.2386	0		17.2386	0		17.2431	0		17.2431	0
17.2504	0		17.2504	0		17.2549	0		17.2549	0
17.2622	0		17.2622	0		17.2667	0		17.2667	0
17.274	0		17.274	0		17.2785	0		17.2785	0
17.2859	0		17.2859	903.17		17.2904	0		17.2904	0
17.2977	0		17.2977	0		17.3022	0		17.3022	0
17.3095	0		17.3095	0		17.314	0		17.314	0
17.3213	0		17.3213	0		17.3258	0		17.3258	0
17.3332	0		17.3332	0		17.3376	0		17.3376	1024.64
17.345	0		17.345	971.357		17.3494	0		17.3494	0
17.3568	0		17.3568	0		17.3613	0		17.3613	1193.26
17.3686	0		17.3686	0		17.3731	0		17.3731	1383.43
17.3804	0		17.3804	0		17.3849	0		17.3849	0
17.3923	0		17.3923	0		17.3967	0		17.3967	0
17.4041	0		17.4041	0		17.4086	0		17.4086	0
17.4159	0		17.4159	0		17.4204	0		17.4204	0
17.4277	0		17.4277	0		17.4322	0		17.4322	0
17.4396	0		17.4396	0		17.444	0		17.444	0
17.4514	0		17.4514	0		17.4559	0		17.4559	1086.28
17.4632	0		17.4632	0		17.4677	0		17.4677	0
17.475	0		17.475	1042.54		17.4806	0		17.4806	0
17.4869	0		17.4869	1629.59		17.4924	0		17.4924	0
17.4987	0		17.4987	0		17.5042	0		17.5042	0
17.5105	0		17.5105	0		17.516	0		17.516	0
17.5223	0		17.5223	0		17.5278	0		17.5278	0
17.5341	0		17.5341	0		17.5397	0		17.5397	0
17.546	0		17.546	0		17.5515	0		17.5515	0
17.5578	0		17.5578	0		17.5633	0		17.5633	0
17.5696	0		17.5696	0		17.5751	0		17.5751	0
17.5814	0		17.5814	0		17.5869	0		17.5869	0
17.5932	0		17.5932	0		17.5988	0		17.5988	883.77
17.6051	0		17.6051	0		17.6106	0		17.6106	0
17.6179	0		17.6179	0		17.6224	0		17.6224	0
17.6298	0		17.6298	0		17.6343	0		17.6343	0
17.6416	0		17.6416	0		17.6461	0		17.6461	0
17.6534	0		17.6534	0		17.659	0		17.659	0
17.6652	0		17.6652	0		17.6708	0		17.6708	0
17.677	0		17.677	0		17.6826	0		17.6826	0
17.6889	0		17.6889	0		17.6944	0		17.6944	0
17.7007	0		17.7007	1031.2		17.7063	0		17.7063	1476.34
17.7125	0		17.7125	950.659		17.7181	0		17.7181	0
17.7254	0		17.7254	0		17.7299	0		17.7299	0
17.7372	0		17.7372	0		17.7417	0		17.7417	0
17.749	0		17.749	0		17.7536	0		17.7536	0
17.7608	0		17.7608	0		17.7654	0		17.7654	0
17.7726	0		17.7726	0		17.7772	0		17.7772	0
17.7845	0		17.7845	0		17.789	0		17.789	0
17.7963	0		17.7963	0		17.8008	0		17.8008	0
17.8081	0		17.8081	0		17.8127	0		17.8127	1240.71
17.8199	0		17.8199	1429.76		17.8245	0		17.8245	0
17.8317	0		17.8317	0		17.8363	0		17.8363	0
17.8436	0		17.8436	0		17.8481	0		17.8481	0
17.8554	0		17.8554	0		17.8599	0		17.8599	0
17.8672	0		17.8672	0		17.8718	0		17.8718	0
17.879	0		17.879	0		17.8836	0		17.8836	0
17.8908	0		17.8908	1154.95		17.8954	0		17.8954	0
17.9027	0		17.9027	0		17.9073	0		17.9073	0
17.9145	0		17.9145	0		17.9191	0		17.9191	1311.69
17.9263	0		17.9263	0		17.9309	0		17.9309	0
17.9381	0		17.9381	0		17.9428	0		17.9428	0
17.95	0		17.95	0		17.9546	0		17.9546	0
17.9618	0		17.9618	0		17.9664	0		17.9664	0
17.9736	0		17.9736	0		17.9782	0		17.9782	0
17.9854	0		17.9854	0		17.9901	0		17.9901	1154.79
17.9972	0		17.9972	0		18.0019	0		18.0019	0
18.0091	0		18.0091	0		18.0137	0		18.0137	0
18.0209	0		18.0209	886.672		18.0255	0		18.0255	1142.3
18.0327	0		18.0327	0		18.0373	0		18.0373	0
18.0445	0		18.0445	0		18.0491	0		18.0491	0
18.0563	0		18.0563	0		18.061	0		18.061	0
18.0681	0		18.0681	1111.26		18.0728	0		18.0728	0
18.08	0		18.08	0		18.0846	0		18.0846	0
18.0918	0		18.0918	0		18.0964	0		18.0964	0
18.1036	0		18.1036	0		18.1083	0		18.1083	0
18.1155	0		18.1155	0		18.1201	0		18.1201	0
18.1273	0		18.1273	1268.46		18.1319	0		18.1319	0
18.1391	0		18.1391	0		18.1437	0		18.1437	0
18.1509	0		18.1509	0		18.1555	0		18.1555	0
18.1638	0		18.1638	0		18.1674	0		18.1674	0
18.1756	0		18.1756	1061.71		18.1792	0		18.1792	0
18.1875	0		18.1875	0		18.191	0		18.191	0
18.1993	0		18.1993	0		18.2028	0		18.2028	0
18.2111	0		18.2111	1106.49		18.2146	0		18.2146	0
18.223	0		18.223	0		18.2265	0		18.2265	0
18.2348	0		18.2348	0		18.2383	0		18.2383	0
18.2466	0		18.2466	1117.88		18.2501	0		18.2501	0
18.2595	0		18.2595	0		18.263	0		18.263	0
18.2713	0		18.2713	0		18.2749	0		18.2749	0
18.2831	0		18.2831	1142.32		18.2867	0		18.2867	0
18.295	0		18.295	0		18.2985	0		18.2985	1031.87
18.3068	0		18.3068	0		18.3103	0		18.3103	0
18.3186	0		18.3186	0		18.3222	0		18.3222	0
18.3304	0		18.3304	0		18.334	0		18.334	1238.65
18.3422	0		18.3422	0		18.3458	0		18.3458	0
18.3541	0		18.3541	0		18.3576	0		18.3576	0
18.3659	0		18.3659	0		18.3694	0		18.3694	0
18.3777	0		18.3777	0		18.3823	0		18.3823	0
18.3895	0		18.3895	0		18.3941	0		18.3941	0
18.4013	0		18.4013	0		18.406	0		18.406	0
18.4131	0		18.4131	1410.94		18.4178	0		18.4178	0
18.4261	0		18.4261	0		18.4296	0		18.4296	0
18.4379	0		18.4379	0		18.4414	0		18.4414	0
18.4497	0		18.4497	0		18.4533	0		18.4533	1319.14
18.4615	0		18.4615	0		18.4661	0		18.4661	0
18.4733	0		18.4733	0		18.478	0		18.478	0
18.4852	0		18.4852	0		18.4898	0		18.4898	0
18.497	0		18.497	0		18.5016	0		18.5016	0
18.5088	0		18.5088	0		18.5134	0		18.5134	0
18.5206	0		18.5206	1568.19		18.5252	0		18.5252	0
18.5325	0		18.5325	0		18.537	0		18.537	0
18.5443	0		18.5443	0		18.5489	0		18.5489	0
18.5561	0		18.5561	0		18.5607	0		18.5607	0
18.5679	0		18.5679	0		18.5725	0		18.5725	0
18.5797	0		18.5797	926.447		18.5843	0		18.5843	0
18.5915	0		18.5915	0		18.5962	0		18.5962	0
18.6034	0		18.6034	0		18.608	0		18.608	0
18.6152	0		18.6152	1014.89		18.6198	0		18.6198	1130.13
18.627	0		18.627	0		18.6316	0		18.6316	0
18.6388	0		18.6388	1120.09		18.6435	0		18.6435	0
18.6507	0		18.6507	0		18.6553	0		18.6553	0
18.6625	0		18.6625	0		18.6671	0		18.6671	0
18.6743	0		18.6743	0		18.6789	0		18.6789	0
18.6861	0		18.6861	0		18.6907	0		18.6907	0
18.6979	0		18.6979	0		18.7026	0		18.7026	0
18.7098	0		18.7098	0		18.7144	0		18.7144	0
18.7216	0		18.7216	0		18.7262	0		18.7262	0
18.7334	0		18.7334	0		18.7391	0		18.7391	0
18.7452	0		18.7452	837.698		18.7509	0		18.7509	0
18.757	0		18.757	0		18.7627	0		18.7627	0
18.7689	0		18.7689	0		18.7745	0		18.7745	0
18.7807	0		18.7807	0		18.7864	0		18.7864	0
18.7925	0		18.7925	0		18.7982	0		18.7982	0
18.8043	0		18.8043	0		18.81	0		18.81	1217.2
18.8161	0		18.8161	0		18.8218	0		18.8218	0
18.828	0		18.828	1628.11		18.8337	0		18.8337	0
18.8398	0		18.8398	0		18.8455	0		18.8455	0
18.8516	0		18.8516	0		18.8573	0		18.8573	0
18.8634	0		18.8634	0		18.8691	0		18.8691	0
18.8763	0		18.8763	0		18.8809	0		18.8809	0
18.8881	0		18.8881	0		18.8927	0		18.8927	0
18.8999	0		18.8999	0		18.9046	0		18.9046	0
18.9118	0		18.9118	1132.85		18.9174	0		18.9174	0
18.9236	0		18.9236	0		18.9293	0		18.9293	837.681
18.9354	0		18.9354	1327.65		18.9411	0		18.9411	0
18.9472	0		18.9472	0		18.9529	0		18.9529	0
18.959	0		18.959	0		18.9647	0		18.9647	0
18.9709	0		18.9709	0		18.9765	0		18.9765	0
18.9838	0		18.9838	855.506		18.9884	0		18.9884	0
18.9956	0		18.9956	0		19.0002	0		19.0002	0
19.0074	0		19.0074	0		19.012	0		19.012	0
19.0192	0		19.0192	997.081		19.0238	0		19.0238	1004.83
19.0311	0		19.0311	0		19.0356	0		19.0356	0
19.0429	0		19.0429	0		19.0475	0		19.0475	0
19.0547	0		19.0547	0		19.0593	0		19.0593	0
19.0665	0		19.0665	0		19.0711	0		19.0711	0
19.0784	0		19.0784	0		19.0829	0		19.0829	0
19.0902	0		19.0902	0		19.0947	0		19.0947	0
19.102	0		19.102	0		19.1066	0		19.1066	0
19.1138	0		19.1138	0		19.1184	0		19.1184	0
19.1256	0		19.1256	0		19.1302	0		19.1302	1131.11
19.1375	0		19.1375	0		19.142	0		19.142	0
19.1493	0		19.1493	0		19.1539	0		19.1539	0
19.1611	0		19.1611	0		19.1657	0		19.1657	0
19.1729	0		19.1729	0		19.1775	0		19.1775	0
19.1847	0		19.1847	0		19.1893	0		19.1893	0
19.1966	0		19.1966	0		19.2011	0		19.2011	0
19.2084	0		19.2084	0		19.213	0		19.213	0
19.2202	0		19.2202	0		19.2248	0		19.2248	0
19.232	0		19.232	1033.76		19.2366	0		19.2366	0
19.2438	0		19.2438	0		19.2484	0		19.2484	0
19.2557	0		19.2557	0		19.2603	0		19.2603	0
19.2675	0		19.2675	0		19.2721	0		19.2721	0
19.2793	0		19.2793	0		19.2839	0		19.2839	0
19.2911	0		19.2911	0		19.2957	0		19.2957	0
19.3029	0		19.3029	0		19.3076	0		19.3076	0
19.3147	0		19.3147	0		19.3194	0		19.3194	0
19.3266	0		19.3266	0		19.3312	0		19.3312	0
19.3384	0		19.3384	0		19.343	0		19.343	0
19.3502	0		19.3502	0		19.3548	0		19.3548	0
19.3621	0		19.3621	0		19.3667	0		19.3667	0
19.3739	0		19.3739	0		19.3785	0		19.3785	0
19.3857	0		19.3857	0		19.3903	0		19.3903	0
19.3975	0		19.3975	0		19.4021	0		19.4021	0
19.4093	0		19.4093	0		19.4139	0		19.4139	0
19.4222	0		19.4222	0		19.4258	0		19.4258	0
19.4341	0		19.4341	0		19.4376	0		19.4376	0
19.4459	0		19.4459	0		19.4494	0		19.4494	0
19.4577	0		19.4577	0		19.4612	0		19.4612	0
19.4695	0		19.4695	0		19.4731	0		19.4731	0
19.4813	0		19.4813	0		19.4849	0		19.4849	0
19.4931	0		19.4931	1273.23		19.4967	0		19.4967	0
19.505	0		19.505	0		19.5085	0		19.5085	0
19.5179	0		19.5179	1003.4		19.5214	0		19.5214	0
19.5297	0		19.5297	0		19.5333	0		19.5333	0
19.5415	0		19.5415	0		19.5451	0		19.5451	1050.64
19.5533	0		19.5533	1707.2		19.5569	0		19.5569	0
19.5651	0		19.5651	1237.17		19.5687	0		19.5687	0
19.577	0		19.577	0		19.5806	0		19.5806	0
19.5888	0		19.5888	0		19.5924	0		19.5924	0
19.6006	0		19.6006	1424.95		19.6042	0		19.6042	0
19.6124	0		19.6124	0		19.616	0		19.616	0
19.6242	0		19.6242	1030.03		19.6279	0		19.6279	1410.03
19.6361	0		19.6361	1622.55		19.6407	0		19.6407	0
19.6479	0		19.6479	1480.99		19.6526	0		19.6526	1022.41
19.6597	0		19.6597	0		19.6644	0		19.6644	1049.58
19.6715	0		19.6715	0		19.6762	0		19.6762	2025.34
19.6844	0		19.6844	1320.58		19.688	0		19.688	0
19.6963	0		19.6963	1053.97		19.6998	0		19.6998	0
19.7081	0		19.7081	0		19.7117	0		19.7117	1011.86
19.7199	0		19.7199	0		19.7246	0		19.7246	0
19.7317	0		19.7317	1302.67		19.7364	0		19.7364	1240.73
19.7436	0		19.7436	1221.38		19.7482	0		19.7482	1180.41
19.7554	0		19.7554	0		19.76	0		19.76	0
19.7672	0		19.7672	906.982		19.7718	0		19.7718	1412.35
19.779	0		19.779	1677.53		19.7837	0		19.7837	0
19.7908	0		19.7908	1405.04		19.7955	0		19.7955	1031.74
19.8027	0		19.8027	0		19.8073	0		19.8073	0
19.8145	0		19.8145	0		19.8191	0		19.8191	1384.71
19.8263	0		19.8263	936.156		19.831	0		19.831	1042.65
19.8381	0		19.8381	1626.7		19.8428	0		19.8428	1352.33
19.85	0		19.85	0		19.8546	0		19.8546	1415.54
19.8618	0		19.8618	1065.88		19.8664	0		19.8664	0
19.8736	0		19.8736	0		19.8783	0		19.8783	1161.93
19.8854	0		19.8854	1056.49		19.8901	0		19.8901	0
19.8972	0		19.8972	0		19.9019	0		19.9019	0
19.9091	0		19.9091	0		19.9137	0		19.9137	1140.94
19.9209	0		19.9209	1056.76		19.9256	0		19.9256	0
19.9327	0		19.9327	0		19.9374	0		19.9374	1342.32
19.9445	0		19.9445	0		19.9492	0		19.9492	0
19.9564	0		19.9564	2189.42		19.961	0		19.961	0
19.9682	0		19.9682	1162.21		19.9728	0		19.9728	0
19.98	0		19.98	1229.35		19.9846	0		19.9846	0
19.9918	0		19.9918	0		19.9975	0		19.9975	0
20.0036	0		20.0036	0		20.0094	0		20.0094	0
20.0155	0		20.0155	0		20.0212	0		20.0212	0
20.0273	0		20.0273	0		20.033	0		20.033	0
20.0391	0		20.0391	0		20.0448	0		20.0448	0
20.0509	0		20.0509	0		20.0566	0		20.0566	0
20.0628	0		20.0628	0		20.0685	0		20.0685	0
20.0746	0		20.0746	0		20.0803	0		20.0803	0
20.0864	0		20.0864	1419.69		20.0921	0		20.0921	0
20.0982	0		20.0982	0		20.1039	0		20.1039	0
20.11	0		20.11	903.267		20.1157	0		20.1157	0
20.1219	0		20.1219	0		20.1276	0		20.1276	0
20.1348	0		20.1348	1177.32		20.1394	0		20.1394	0
20.1466	0		20.1466	0		20.1512	0		20.1512	0
20.1584	0		20.1584	0		20.163	0		20.163	1232.86
20.1702	0		20.1702	0		20.1759	0		20.1759	0
20.182	0		20.182	0		20.1877	0		20.1877	0
20.1938	0		20.1938	1027.72		20.1995	0		20.1995	0
20.2057	0		20.2057	0		20.2115	0		20.2115	0
20.2175	0		20.2175	0		20.2233	0		20.2233	0
20.2293	0		20.2293	0		20.2352	0		20.2352	0
20.2422	0		20.2422	0		20.247	0		20.247	1372.57
20.254	0		20.254	998.476		20.2588	0		20.2588	0
20.2658	0		20.2658	0		20.2707	0		20.2707	0
20.2776	0		20.2776	0		20.2825	0		20.2825	0
20.2895	0		20.2895	0		20.2943	0		20.2943	0
20.3013	0		20.3013	0		20.3061	0		20.3061	0
20.3131	0		20.3131	0		20.318	0		20.318	0
20.3249	0		20.3249	0		20.3298	0		20.3298	0
20.3367	0		20.3367	0		20.3416	0		20.3416	0
20.3486	0		20.3486	0		20.3534	0		20.3534	0
20.3604	0		20.3604	0		20.3652	0		20.3652	0
20.3722	0		20.3722	0		20.3771	0		20.3771	0
20.384	0		20.384	0		20.3889	0		20.3889	0
20.3958	0		20.3958	0		20.4007	0		20.4007	0
20.4077	0		20.4077	0		20.4125	0		20.4125	0
20.4195	0		20.4195	0		20.4244	0		20.4244	0
20.4313	0		20.4313	0		20.4362	0		20.4362	0
20.4431	0		20.4431	0		20.448	0		20.448	0
20.455	1099.16		20.455	0		20.4609	0		20.4609	0
20.4668	0		20.4668	0		20.4727	0		20.4727	0
20.4786	0		20.4786	1015.16		20.4846	0		20.4846	0
20.4915	0		20.4915	0		20.4964	0		20.4964	1440.5
20.5033	0		20.5033	0		20.5082	0		20.5082	0
20.5152	0		20.5152	0		20.52	0		20.52	0
20.527	0		20.527	0		20.5319	0		20.5319	0
20.5388	0		20.5388	0		20.5448	0		20.5448	0
20.5517	0		20.5517	0		20.5577	0		20.5577	0
20.5635	0		20.5635	1046.9		20.5695	0		20.5695	0
20.5753	0		20.5753	0		20.5813	0		20.5813	0
20.5872	0		20.5872	974.031		20.5931	0		20.5931	0
20.599	0		20.599	0		20.6049	0		20.6049	0
20.6108	0		20.6108	0		20.6167	0		20.6167	0
20.6226	0		20.6226	0		20.6286	0		20.6286	0
20.6344	0		20.6344	0		20.6404	0		20.6404	0
20.6463	0		20.6463	0		20.6521	0		20.6521	0
20.6581	0		20.6581	0		20.664	0		20.664	0
20.6699	0		20.6699	0		20.6759	0		20.6759	0
20.6828	0		20.6828	0		20.6877	0		20.6877	0
20.6946	0		20.6946	0		20.6995	0		20.6995	0
20.7064	0		20.7064	0		20.7112	0		20.7112	0
20.7182	0		20.7182	0		20.723	0		20.723	0
20.7311	0		20.7311	0		20.7349	0		20.7349	0
20.7428	0		20.7428	0		20.7466	0		20.7466	0
20.7548	0		20.7548	0		20.7585	0		20.7585	0
20.7665	0		20.7665	0		20.7702	0		20.7702	0
20.7793	0		20.7793	0		20.783	0		20.783	0
20.7912	0		20.7912	0		20.7948	0		20.7948	0
20.8029	0		20.8029	0		20.8066	0		20.8066	0
20.8148	0		20.8148	0		20.8183	0		20.8183	0
20.8266	0		20.8266	0		20.8302	0		20.8302	0
20.8384	0		20.8384	0		20.842	0		20.842	0
20.8503	0		20.8503	0		20.8538	0		20.8538	0
20.8621	0		20.8621	0		20.8657	0		20.8657	0
20.874	0		20.874	0		20.8776	0		20.8776	0
20.8857	0		20.8857	0		20.8893	0		20.8893	0
20.8975	0		20.8975	0		20.902	0		20.902	0
20.9094	0		20.9094	0		20.9139	0		20.9139	0
20.9211	0		20.9211	0		20.9258	0		20.9258	0
20.933	0		20.933	0		20.9376	0		20.9376	0
20.946	0		20.946	0		20.9494	0		20.9494	0
20.9578	0		20.9578	0		20.9611	0		20.9611	0
20.9696	0		20.9696	0		20.973	0		20.973	0
20.9814	0		20.9814	0		20.9858	0		20.9858	1536.96
20.9932	0		20.9932	0		20.9977	0		20.9977	0
21.0051	0		21.0051	0		21.0095	0		21.0095	0
21.0169	0		21.0169	0		21.0213	0		21.0213	0
21.0287	0		21.0287	0		21.0332	0		21.0332	0
21.0405	0		21.0405	0		21.045	0		21.045	0
21.0524	0		21.0524	0		21.0569	0		21.0569	0
21.0642	0		21.0642	0		21.0687	0		21.0687	0
21.076	0		21.076	0		21.0805	0		21.0805	0
21.0878	0		21.0878	0		21.0923	0		21.0923	0
21.0996	0		21.0996	0		21.1042	0		21.1042	0
21.1115	0		21.1115	1161.66		21.116	0		21.116	0
21.1233	0		21.1233	0		21.1278	0		21.1278	0
21.1351	0		21.1351	987.462		21.1396	0		21.1396	0
21.1469	0		21.1469	0		21.1514	0		21.1514	0
21.1587	0		21.1587	0		21.1633	0		21.1633	0
21.1706	0		21.1706	0		21.1751	0		21.1751	0
21.1824	0		21.1824	0		21.1869	0		21.1869	0
21.1942	0		21.1942	0		21.1988	0		21.1988	0
21.2061	0		21.2061	0		21.2106	0		21.2106	0
21.2179	0		21.2179	1749.91		21.2224	0		21.2224	0
21.2297	0		21.2297	0		21.2342	0		21.2342	0
21.2415	0		21.2415	956.586		21.2461	0		21.2461	0
21.2533	0		21.2533	0		21.2589	0		21.2589	0
21.2652	0		21.2652	0		21.2708	0		21.2708	0
21.277	0		21.277	1045.95		21.2826	0		21.2826	0
21.2888	0		21.2888	0		21.2944	0		21.2944	0
21.3006	0		21.3006	0		21.3062	0		21.3062	0
21.3124	0		21.3124	0		21.3181	0		21.3181	0
21.3243	0		21.3243	0		21.3299	0		21.3299	0
21.3361	0		21.3361	0		21.3417	0		21.3417	0
21.3479	0		21.3479	0		21.3535	0		21.3535	0
21.3597	0		21.3597	0		21.3653	0		21.3653	0
21.3716	0		21.3716	940.681		21.3772	0		21.3772	0
21.3834	0		21.3834	0		21.389	0		21.389	0
21.3963	0		21.3963	0		21.4008	0		21.4008	0
21.4081	0		21.4081	0		21.4126	0		21.4126	0
21.4199	0		21.4199	0		21.4244	0		21.4244	0
21.4318	0		21.4318	0		21.4374	0		21.4374	0
21.4436	0		21.4436	0		21.4492	0		21.4492	0
21.4554	0		21.4554	0		21.461	0		21.461	0
21.4672	0		21.4672	0		21.4728	0		21.4728	1208.62
21.4791	0		21.4791	1120.76		21.4846	0		21.4846	0
21.4909	0		21.4909	847.575		21.4964	0		21.4964	0
21.5038	0		21.5038	0		21.5083	0		21.5083	0
21.5156	0		21.5156	0		21.5201	0		21.5201	0
21.5274	0		21.5274	0		21.5319	0		21.5319	0
21.5393	0		21.5393	0		21.5438	0		21.5438	0
21.5511	0		21.5511	0		21.5556	0		21.5556	0
21.5629	0		21.5629	0		21.5674	0		21.5674	0
21.5747	0		21.5747	0		21.5792	0		21.5792	0
21.5865	0		21.5865	953.098		21.591	0		21.591	0
21.5983	0		21.5983	0		21.6029	0		21.6029	0
21.6102	0		21.6102	0		21.6147	0		21.6147	0
21.622	0		21.622	0		21.6265	0		21.6265	0
21.6338	942.599		21.6338	1045.97		21.6383	0		21.6383	0
21.6456	0		21.6456	0		21.6501	0		21.6501	0
21.6574	0		21.6574	0		21.6619	0		21.6619	0
21.6693	0		21.6693	0		21.6738	0		21.6738	0
21.6811	0		21.6811	0		21.6856	0		21.6856	0
21.6929	0		21.6929	0		21.6974	0		21.6974	0
21.7048	0		21.7048	1168.11		21.7093	0		21.7093	0
21.7166	0		21.7166	0		21.7211	0		21.7211	0
21.7284	0		21.7284	0		21.7329	0		21.7329	0
21.7402	0		21.7402	0		21.7447	0		21.7447	0
21.7521	0		21.7521	0		21.7565	0		21.7565	0
21.7639	0		21.7639	0		21.7684	0		21.7684	0
21.7757	0		21.7757	916.11		21.7802	0		21.7802	0
21.7875	0		21.7875	0		21.792	0		21.792	0
21.7993	0		21.7993	0		21.8038	0		21.8038	0
21.8112	0		21.8112	0		21.8157	0		21.8157	0
21.823	0		21.823	0		21.8275	0		21.8275	0
21.8348	0		21.8348	0		21.8393	0		21.8393	0
21.8466	0		21.8466	0		21.8511	0		21.8511	0
21.8584	0		21.8584	0		21.8629	0		21.8629	1408.53
21.8703	0		21.8703	0		21.8748	0		21.8748	0
21.8821	0		21.8821	0		21.8866	0		21.8866	0
21.8939	0		21.8939	0		21.8984	0		21.8984	0
21.9057	0		21.9057	0		21.9102	0		21.9102	0
21.9176	0		21.9176	916.723		21.9221	0		21.9221	0
21.9294	0		21.9294	0		21.9339	0		21.9339	0
21.9423	0		21.9423	0		21.9457	0		21.9457	0
21.9541	0		21.9541	0		21.9575	0		21.9575	0
21.966	0		21.966	0		21.9694	0		21.9694	0
21.9778	0		21.9778	0		21.9812	0		21.9812	0
21.9896	0		21.9896	0		21.993	0		21.993	0
22.0014	0		22.0014	0		22.0048	0		22.0048	0
22.0132	0		22.0132	0		22.0166	0		22.0166	0
22.025	0		22.025	1099.75		22.0285	0		22.0285	1032.4
22.0379	0		22.0379	0		22.0414	0		22.0414	0
22.0498	0		22.0498	0		22.0532	0		22.0532	0
22.0616	0		22.0616	0		22.065	0		22.065	0
22.0734	0		22.0734	0		22.0769	0		22.0769	0
22.0852	0		22.0852	0		22.0887	0		22.0887	0
22.097	0		22.097	0		22.1005	0		22.1005	0
22.1089	0		22.1089	0		22.1123	0		22.1123	0
22.1207	0		22.1207	0		22.1242	0		22.1242	0
22.1325	0		22.1325	895.236		22.136	0		22.136	0
22.1443	0		22.1443	0		22.1478	0		22.1478	0
22.1561	0		22.1561	0		22.1607	0		22.1607	0
22.168	0		22.168	0		22.1725	0		22.1725	0
22.1798	0		22.1798	0		22.1844	0		22.1844	0
22.1916	0		22.1916	1023.76		22.1962	0		22.1962	0
22.2046	0		22.2046	0		22.208	0		22.208	0
22.2164	0		22.2164	0		22.2198	0		22.2198	0
22.2282	0		22.2282	0		22.2316	0		22.2316	0
22.24	0		22.24	0		22.2445	0		22.2445	0
22.2518	0		22.2518	0		22.2563	0		22.2563	0
22.2637	0		22.2637	0		22.2682	0		22.2682	0
22.2755	0		22.2755	0		22.28	0		22.28	0
22.2873	0		22.2873	0		22.2918	0		22.2918	0
22.2991	0		22.2991	0		22.3036	0		22.3036	0
22.311	0		22.311	1119.39		22.3155	0		22.3155	0
22.3228	0		22.3228	0		22.3273	0		22.3273	0
22.3346	0		22.3346	0		22.3391	0		22.3391	0
22.3464	0		22.3464	0		22.3509	0		22.3509	0
22.3582	0		22.3582	0		22.3627	0		22.3627	0
22.3701	0		22.3701	0		22.3746	0		22.3746	0
22.3819	0		22.3819	0		22.3864	0		22.3864	0
22.3937	0		22.3937	0		22.3982	0		22.3982	0
22.4055	0		22.4055	0		22.41	0		22.41	0
22.4173	0		22.4173	0		22.4219	0		22.4219	0
22.4292	0		22.4292	923.857		22.4337	0		22.4337	0
22.441	0		22.441	0		22.4455	0		22.4455	0
22.4528	0		22.4528	0		22.4574	0		22.4574	0
22.4647	0		22.4647	0		22.4692	0		22.4692	0
22.4765	0		22.4765	0		22.481	0		22.481	0
22.4883	0		22.4883	0		22.4928	0		22.4928	0
22.5001	0		22.5001	0		22.5046	0		22.5046	0
22.5119	0		22.5119	0		22.5175	0		22.5175	0
22.5238	0		22.5238	0		22.5294	0		22.5294	0
22.5356	0		22.5356	0		22.5412	0		22.5412	0
22.5474	0		22.5474	1093.1		22.553	0		22.553	0
22.5592	0		22.5592	0		22.5648	0		22.5648	0
22.571	0		22.571	0		22.5766	0		22.5766	0
22.5829	0		22.5829	0		22.5885	0		22.5885	0
22.5947	0		22.5947	1085.76		22.6003	0		22.6003	975.792
22.6065	0		22.6065	0		22.6121	0		22.6121	0
22.6184	0		22.6184	0		22.6239	0		22.6239	0
22.6302	0		22.6302	0		22.6358	0		22.6358	0
22.642	0		22.642	0		22.6476	0		22.6476	0
22.6549	0		22.6549	0		22.6594	0		22.6594	0
22.6667	0		22.6667	0		22.6712	0		22.6712	0
22.6785	0		22.6785	0		22.683	0		22.683	0
22.6904	0		22.6904	0		22.6959	0		22.6959	0
22.7022	0		22.7022	0		22.7078	0		22.7078	0
22.714	0		22.714	0		22.7196	0		22.7196	0
22.7258	0		22.7258	0		22.7314	0		22.7314	0
22.7377	0		22.7377	0		22.7432	0		22.7432	0
22.7495	0		22.7495	0		22.7551	0		22.7551	0
22.7624	0		22.7624	0		22.7669	0		22.7669	0
22.7742	0		22.7742	981.357		22.7787	0		22.7787	0
22.786	0		22.786	0		22.7905	0		22.7905	0
22.7978	0		22.7978	0		22.8024	0		22.8024	0
22.8097	0		22.8097	0		22.8142	0		22.8142	0
22.8215	0		22.8215	0		22.826	0		22.826	0
22.8333	0		22.8333	790.343		22.8378	0		22.8378	0
22.8451	0		22.8451	0		22.8497	0		22.8497	0
22.8569	0		22.8569	1408.43		22.8615	0		22.8615	0
22.8687	0		22.8687	0		22.8733	0		22.8733	0
22.8806	0		22.8806	994.754		22.8851	0		22.8851	0
22.8924	0		22.8924	0		22.8969	0		22.8969	0
22.9042	0		22.9042	0		22.9087	0		22.9087	0
22.916	0		22.916	0		22.9206	0		22.9206	0
22.9278	0		22.9278	0		22.9324	0		22.9324	0
22.9397	0		22.9397	0		22.9442	0		22.9442	0
22.9515	0		22.9515	0		22.9561	0		22.9561	0
22.9633	0		22.9633	0		22.9679	0		22.9679	0
22.9752	0		22.9752	1121.6		22.9797	0		22.9797	0
22.987	0		22.987	0		22.9915	0		22.9915	0
22.9988	0		22.9988	0		23.0033	0		23.0033	0
23.0106	0		23.0106	0		23.0152	0		23.0152	0
23.0224	0		23.0224	902.239		23.027	0		23.027	0
23.0343	0		23.0343	0		23.0388	0		23.0388	0
23.0461	0		23.0461	0		23.0506	0		23.0506	0
23.0579	0		23.0579	0		23.0624	0		23.0624	0
23.0697	0		23.0697	0		23.0742	0		23.0742	0
23.0815	0		23.0815	0		23.0861	0		23.0861	0
23.0934	0		23.0934	0		23.0979	0		23.0979	0
23.1052	0		23.1052	0		23.1097	0		23.1097	0
23.117	0		23.117	0		23.1216	0		23.1216	0
23.1288	0		23.1288	0		23.1334	0		23.1334	0
23.1407	0		23.1407	0		23.1452	0		23.1452	0
23.1525	0		23.1525	0		23.157	0		23.157	0
23.1643	0		23.1643	0		23.1689	0		23.1689	0
23.1761	0		23.1761	0		23.1807	0		23.1807	0
23.1879	0		23.1879	0		23.1925	0		23.1925	0
23.2008	0		23.2008	0		23.2043	0		23.2043	0
23.2126	0		23.2126	0		23.2161	0		23.2161	0
23.2245	0		23.2245	0		23.228	0		23.228	0
23.2363	0		23.2363	0		23.2398	0		23.2398	0
23.2481	0		23.2481	0		23.2516	0		23.2516	0
23.2599	0		23.2599	916.528		23.2634	0		23.2634	0
23.2717	0		23.2717	0		23.2752	0		23.2752	0
23.2836	0		23.2836	0		23.2871	0		23.2871	0
23.2965	0		23.2965	0		23.3	0		23.3	0
23.3083	0		23.3083	0		23.3118	0		23.3118	0
23.3201	0		23.3201	0		23.3236	0		23.3236	0
23.3319	0		23.3319	0		23.3354	0		23.3354	0
23.3438	0		23.3438	0		23.3473	0		23.3473	0
23.3556	0		23.3556	0		23.3591	0		23.3591	0
23.3674	0		23.3674	0		23.3709	0		23.3709	0
23.3792	0		23.3792	1058.21		23.3828	0		23.3828	0
23.391	0		23.391	0		23.3946	0		23.3946	0
23.4029	0		23.4029	0		23.4064	0		23.4064	0
23.4147	0		23.4147	0		23.4193	0		23.4193	0
23.4265	0		23.4265	0		23.4311	0		23.4311	0
23.4383	0		23.4383	1031.52		23.443	0		23.443	0
23.4501	0		23.4501	0		23.4548	0		23.4548	0
23.4631	0		23.4631	0		23.4666	0		23.4666	0
23.4749	0		23.4749	0		23.4784	0		23.4784	0
23.4867	0		23.4867	0		23.4902	0		23.4902	0
23.4985	0		23.4985	0		23.5031	0		23.5031	0
23.5103	0		23.5103	0		23.515	0		23.515	0
23.5222	0		23.5222	0		23.5268	0		23.5268	0
23.534	0		23.534	0		23.5386	0		23.5386	0
23.5458	0		23.5458	0		23.5504	0		23.5504	0
23.5576	0		23.5576	0		23.5622	0		23.5622	0
23.5694	0		23.5694	0		23.5741	0		23.5741	0
23.5813	0		23.5813	0		23.5859	0		23.5859	0
23.5931	0		23.5931	0		23.5977	0		23.5977	0
23.6049	0		23.6049	0		23.6095	0		23.6095	0
23.6167	0		23.6167	0		23.6213	0		23.6213	1294.85
23.6286	0		23.6286	0		23.6332	0		23.6332	0
23.6404	0		23.6404	0		23.645	0		23.645	0
23.6522	0		23.6522	0		23.6568	0		23.6568	0
23.664	0		23.664	884.202		23.6686	0		23.6686	0
23.6758	0		23.6758	0		23.6805	0		23.6805	0
23.6877	0		23.6877	0		23.6923	0		23.6923	0
23.6995	0		23.6995	0		23.7041	0		23.7041	0
23.7113	0		23.7113	0		23.7159	0		23.7159	0
23.7231	0		23.7231	0		23.7278	0		23.7278	0
23.7349	0		23.7349	0		23.7396	0		23.7396	0
[truncated: 527 more rows]

## Sheet: D+E
Metabolite	Formula	Labeling	Ion Type	RT Start (min)	RT End (min)	m/z Tolerance (ppm)	RT Tolerance (min)	mz	obs_mz	ppm	winner	is_global_winner	RT	RT_min	RT_max	RT_range	detections	S03916	S03917	S03918	S03919	S03920	SQ290_B_0	SQ290_B_1	SQ290_B_2	SQ290_B_3	SQ290_B_4	SQ290_B_5
Alanine-13C-0	C3H7NO2-13C-0	13C	[M+H]+	10.4	11.9	15	0.2	90.055	90.0554	4.9	S03919	No	10.92	10.91	10.98	0.07	11	14409643	16903434	17289340	19583376	881003	159848	111621	111857	145267	150424	117745
Alanine-13C-1	C3H7NO2-13C-1	13C	[M+H]+	10.4	11.9	15	0.2	91.0583	91.0587	4.3	S03918	No	10.97	10.91	10.98	0.07	10	2122276	2468432	2921516	2842508	12336	1200	1491	860	0	2269	1001
Alanine-13C-2	C3H7NO2-13C-2	13C	[M+H]+	10.4	11.9	15	0.2	92.0617	92.0621	4.7	S03919	No	10.92	10.91	10.97	0.05	6	3641455	4123993	4593360	4741326	159895	0	0	0	0	1350	0
Alanine-13C-3	C3H7NO2-13C-3	13C	[M+H]+	10.4	11.9	15	0.2	93.065	93.0653	3	S03917	Yes	10.92	10.91	10.97	0.05	7	46550316	52153684	43348664	49847448	6445342	0	0	4159	0	16297	0
Alanine-13C,15N-3,1	C3H7NO2-13C,15N-3,1	13C,15N	[M+H]+	10.4	11.9	15	0.2	94.0621	94.0623	2.6	S03918	Yes	10.97	10.86	11.03	0.18	11	5635728	5582966	5922014	5685030	3946117	13622	1792	1341	2132	1894	4325
Metabolite	Formula	Labeling	Ion Type	RT Start (min)	RT End (min)	m/z Tolerance (ppm)	RT Tolerance (min)	mz	obs_mz	ppm	winner	is_global_winner	RT	RT_min	RT_max	RT_range	detections	S03916	S03917	S03918	S03919	S03920	SQ290_B_0	SQ290_B_1	SQ290_B_2	SQ290_B_3	SQ290_B_4	SQ290_B_5	SQ290_ISTD_0	SQ290_ISTD_1	SQ290_ISTD_2	Blank Threshold
Valine-13C-0	C5H11NO2-13C-0	13C	[M+H]+	8.5	10	15	0.2	118.086	118.086	1.2	S03919	Yes	9.15	9.08	9.24	0.16	14	3463950	4238778	4142079	5390118	886104	439846	270045	237706	237361	290469	231498	183626	225972	252748	863462
Valine-13C-1	C5H11NO2-13C-1	13C	[M+H]+	8.5	10	15	0.2	119.09	119.09	1.6	S03919	No	9.15	9.08	9.24	0.16	14	130009	180506	177724	255822	20225	13421	4826	9398	7299	5198	1426	6344	7826	7723	30784
Valine-13C-2	C5H11NO2-13C-2	13C	[M+H]+	8.5	10	15	0.2	120.093	120.093	2	S03917	No	9.24	9.09	9.24	0.15	7	7605	12310	1365	1593	2029	0	0	0	0	0	0	1538	1469	0	10000
Valine-13C-3	C5H11NO2-13C-3	13C	[M+H]+	8.5	10	15	0.2	121.096	121.097	1.5	S03917	No	9.24	9.11	9.24	0.14	5	8368	16145	0	0	2029	0	0	0	0	0	0	0	1370	1362	10000
Valine-13C-4	C5H11NO2-13C-4	13C	[M+H]+	8.5	10	15	0.2	122.1	122.1	0.2	S03917	No	9.24	9.15	9.24	0.1	3	8161	13783	0	0	7931	0	0	0	0	0	0	0	0	0	10000
Valine-13C-5	C5H11NO2-13C-5	13C	[M+H]+	8.5	10	15	0.2	123.103	123.103	1.4	S03920	No	9.15	9.11	9.24	0.14	6	245404	347831	1410	8776	420729	0	0	0	0	0	0	0	0	1760	10000
Valine_IS-13C,15N-5,1	C5H11NO2-13C,15N-5,1	13C,15N	[M+H]+	8.5	10	15	0.2	124.1	124.1	0.3	S03919	Yes	9.16	9.03	9.24	0.21	14	8570568	9724722	8595301	10460242	6669101	27316	15056	19698	47148	55288	80691	7012383	9554141	9922461	132598

## Sheet: F
MS Detection Parameters											Peak Intensities in Samples
Metabolite	Formula	Polarity (z)	mz	obs_mz	ppm	RT	RT_min	RT_max	RT_range	detections	S03916	S03917	S03918	S03919	S03920
Pyruvic acid-13C-0	C3H4O3-13C-0	-	87.0088	87.0075	-14.6	5.97	5.74	6.06	0.32	0	-	-	-	-	-
Pyruvic acid-13C-1	C3H4O3-13C-1	-	88.0121	88.0107	-16.2	5.97	5.97	6.01	0.04	0	-	-	-	-	-
Pyruvic acid-13C-2	C3H4O3-13C-2	-	89.0155	89.0146	-9.9	5.97	5.97	6.02	0.05	0	-	-	-	-	-
Pyruvic acid-13C-3	C3H4O3-13C-3	-	90.0188	90.0174	-15.9	5.97	5.95	6.02	0.06	1	-	-	15018	-	-
(S)-2-Acetolactic acid-13C-0	C5H8O4-13C-0	-	131.035	131.035	3.2	0.35	0.34	0.61	0.27	0	-	-	-	-	-
(S)-2-Acetolactic acid-13C-1	C5H8O4-13C-1	-	132.038	132.039	4.3	0.38	0.34	0.61	0.27	0	-	-	-	-	-
(S)-2-Acetolactic acid-13C-2	C5H8O4-13C-2	-	133.042	133.04	-12	0.35	0.34	0.61	0.27	0	-	-	-	-	-
(S)-2-Acetolactic acid-13C-3	C5H8O4-13C-3	-	134.045	134.046	10.1	0.36	0.34	0.61	0.27	0	-	-	-	-	-
(S)-2-Acetolactic acid-13C-4	C5H8O4-13C-4	-	135.048	0	0	0	0	0	0	0	-	-	-	-	-
(S)-2-Acetolactic acid-13C-5	C5H8O4-13C-5	-	136.052	136.05	-9.2	0.38	0.34	0.61	0.27	0	-	-	-	-	-
(R)-2,3-Dihydroxy-3-methylbutanoic acid-13C-0	C5H10O4-13C-0	-	133.051	133.051	3.5	5.04	4.88	5.16	0.28	0	-	-	-	-	-
(R)-2,3-Dihydroxy-3-methylbutanoic acid-13C-1	C5H10O4-13C-1	-	134.054	134.054	-2.9	5.11	4.88	5.11	0.23	0	-	-	-	-	-
(R)-2,3-Dihydroxy-3-methylbutanoic acid-13C-2	C5H10O4-13C-2	-	135.057	135.057	-5.5	5.11	4.88	5.16	0.28	2	-	187260	-	78921	-
(R)-2,3-Dihydroxy-3-methylbutanoic acid-13C-3	C5H10O4-13C-3	-	136.061	136.06	-5.9	5.11	4.89	5.16	0.27	3	31787	192048	-	87453	-
(R)-2,3-Dihydroxy-3-methylbutanoic acid-13C-4	C5H10O4-13C-4	-	137.064	137.063	-6.2	5.11	5.08	5.16	0.08	4	44093	216233	-	61242	15571
(R)-2,3-Dihydroxy-3-methylbutanoic acid-13C-5	C5H10O4-13C-5	-	138.067	138.066	-7.3	5.11	4.88	5.16	0.28	4	3139881	5589547	-	2405809	2048008
