# Supplementary material for: Resurrecting essential amino acid biosynthesis in mammalian cells
Source: eLife journal article supplement (doi:10.7554/elife.72847), 2022-09-27
Supplement: supp [file Figure 3-source data 1.xlsx]

## Sheet: Sample Key
Sample Key
S03916	pMTIV complete medium
S03918	pCtrl complete medium
S03920	pMTIV valine-free medium

## Sheet: A
S03918			S03920
m/z	Intensity		m/z	Intensity
66.3338	0		66.3339	0
66.3338	0		66.3339	0
66.3339	0		66.334	0
66.334	0		66.3341	0
67.8057	0		67	0
67.8058	0		67.0001	0
67.8059	0		67.0002	0
67.806	0		67.0003	0
67.806	625.03		67.0003	545.925
67.8061	1221.1		67.0004	955.587
67.8062	1832.87		67.0005	1113.04
67.8063	2138.12		67.0005	891.324
67.8063	1956.87		67.0006	456.132
67.8064	1371.58		67.0007	0
67.8065	708.421		67.0008	0
67.8066	0		67.0008	0
67.8066	0		67.0009	0
67.8067	0		67.042	0
67.8068	0		67.0421	0
69.0449	0		67.0422	0
69.045	0		67.0422	0
69.045	0		67.0423	532.072
69.0451	0		67.0424	896.835
69.0452	897.198		67.0424	973.433
69.0453	1639.68		67.0425	700.661
69.0453	2335.1		67.0426	296.768
69.0454	2693.31		67.0427	0
69.0455	2531.51		67.0427	0
69.0456	1902.96		67.0428	0
69.0457	1102		67.0429	0
69.0457	489.794		68.0499	0
69.0458	0		68.0499	0
69.0459	0		68.05	0
69.046	0		68.0501	0
69.046	0		68.0502	348.683
69.0701	0		68.0502	785.752
69.0701	0		68.0503	990.08
69.0702	0		68.0504	814.323
69.0703	0		68.0505	419.115
69.0704	987.621		68.0505	0
69.0705	1534.7		68.0506	0
69.0705	1717.17		68.0507	0
69.0706	1458.8		68.0508	0
69.0707	944.64		68.6527	0
69.0707	0		68.6528	0
69.0708	0		68.6529	0
69.0709	0		68.6529	0
69.071	0		68.653	347.134
70.0651	0		68.6531	685.774
70.0652	0		68.6532	899.546
70.0653	0		68.6532	850.622
70.0653	0		68.6533	573.914
70.0654	689.603		68.6534	0
70.0655	4831.39		68.6535	0
70.0656	17462.5		68.6535	0
70.0657	46285.2		68.6536	0
70.0657	76993.6		69.045	0
70.0658	96402.6		69.045	0
70.0659	74980		69.0451	0
70.066	44689.6		69.0452	0
70.066	16906.2		69.0453	589.236
70.0661	4922.08		69.0453	1115.77
70.0662	149.553		69.0454	1602.92
70.0663	0		69.0455	1827.39
70.0664	0		69.0456	1671.95
70.0664	0		69.0456	1203.3
70.0665	0		69.0457	641.731
70.4009	0		69.0458	0
70.401	0		69.0459	0
70.4011	0		69.046	0
70.4011	0		69.046	0
70.4012	508.763		69.0702	0
70.4013	1104.22		69.0703	0
70.4014	1564.89		69.0704	0
70.4015	1567.34		69.0704	0
70.4015	1117.03		69.0705	645.29
70.4016	531.975		69.0706	715.645
70.4017	0		69.0707	739.48
70.4018	0		69.0708	703.037
70.4019	0		69.0708	560.898
70.4019	0		69.0709	0
70.4395	0		69.071	0
70.4395	0		69.0711	0
70.4396	0		69.0711	0
70.4397	0		69.3962	0
70.4398	944.711		69.3963	0
70.4399	1485.12		69.3964	0
70.4399	1683.54		69.3965	0
70.44	1415.78		69.3966	585.801
70.4401	857.019		69.3966	890.865
70.4402	0		69.3967	996.587
70.4402	0		69.3968	862.674
70.4403	0		69.3969	579.14
70.4404	0		69.3969	0
70.442	0		69.397	0
70.4421	0		69.3971	0
70.4422	0		69.3972	0
70.4422	0		69.4015	0
70.4423	814.844		69.4016	0
70.4424	1164.61		69.4017	0
70.4425	1385.44		69.4018	0
70.4425	1342.71		69.4018	546.437
70.4426	999.587		69.4019	760.968
70.4427	0		69.402	824.605
70.4428	0		69.4021	683.283
70.4429	0		69.4021	398.603
70.4429	0		69.4022	0
70.6827	0		69.4023	0
70.6828	0		69.4024	0
70.6829	0		69.4025	0
70.683	0		69.4042	0
70.683	776.058		69.4043	0
70.6831	1277.3		69.4044	0
70.6832	1517.82		69.4045	0
70.6833	1343.56		69.4045	375.966
70.6834	869.884		69.4046	698.384
70.6834	0		69.4047	828.36
70.6835	0		69.4048	715.079
70.6836	0		69.4049	456.614
70.6837	0		69.4049	0
71.0492	0		69.405	0
71.0493	0		69.4051	0
71.0494	0		69.4052	0
71.0495	0		69.4068	0
71.0496	721.316		69.4069	0
71.0496	1463.65		69.407	0
71.0497	2249.18		69.407	0
71.0498	2717.74		69.4071	670.738
71.0499	2595.59		69.4072	1007.09
71.05	1929.17		69.4073	1055.81
71.05	1077.35		69.4073	806.345
71.0501	422.215		69.4074	441.854
71.0502	0		69.4075	0
71.0503	0		69.4076	0
71.0504	0		69.4077	0
71.0504	0		69.4077	0
72.0699	0		69.4217	0
72.0699	0		69.4218	0
72.07	0		69.4219	0
72.0701	0		69.4219	0
72.0702	481.501		69.422	429.258
72.0703	1382.73		69.4221	712.597
72.0704	2189.34		69.4222	848.875
72.0704	2314.6		69.4222	751.08
72.0705	1689.11		69.4223	488.184
72.0706	803.887		69.4224	0
72.0707	0		69.4225	0
72.0708	0		69.4226	0
72.0708	0		69.4226	0
72.0709	0		69.4253	0
72.0805	0		69.4254	0
72.0805	0		69.4254	0
72.0806	0		69.4255	0
72.0807	0		69.4256	622.425
72.0808	265.158		69.4257	937.167
72.0809	2220.84		69.4257	981.323
72.081	8078.14		69.4258	705.785
72.081	10134.8		69.4259	300.849
72.0811	23915.4		69.426	0
72.0812	79334.6		69.426	0
72.0813	236161		69.4261	0
72.0814	405101		69.4262	0
72.0814	529592		69.4803	0
72.0815	417400		69.4804	0
72.0816	246152		69.4805	0
72.0817	85379.4		69.4806	0
72.0818	22867.4		69.4807	427.048
72.0819	5770.44		69.4807	705.351
72.0819	2980.99		69.4808	844.686
72.082	0		69.4809	774.406
72.0821	0		69.481	536.595
72.0822	0		69.481	0
72.0823	0		69.4811	0
72.0823	0		69.4812	0
72.0917	0		69.4813	0
72.0918	0		69.4837	0
72.0919	0		69.4838	0
72.092	0		69.4838	0
72.092	740.051		69.4839	0
72.0921	1378.15		69.484	594.613
72.0922	1796.15		69.4841	884.975
72.0923	1731.23		69.4842	931.307
72.0924	1218.19		69.4842	679.622
72.0924	666.688		69.4843	298.198
72.0925	550.974		69.4844	0
72.0926	962.008		69.4845	0
72.0927	1513.42		69.4845	0
72.0928	1721.59		69.4846	0
72.0929	1431.42		69.5111	0
72.0929	855.669		69.5111	0
72.093	296.652		69.5112	0
72.0931	0		69.5113	0
72.0932	0		69.5114	372.326
72.0933	0		69.5114	711.585
72.0933	0		69.5115	885.548
73.0297	0		69.5116	767.381
73.0298	0		69.5117	442.024
73.0299	0		69.5118	0
73.03	0		69.5118	0
73.0301	428.025		69.5119	0
73.0301	869.439		69.512	0
73.0302	1061.05		69.5219	0
73.0303	842.352		69.522	0
73.0304	358.31		69.522	0
73.0305	0		69.5221	0
73.0306	0		69.5222	442.438
73.0307	0		69.5223	706.766
73.0308	0		69.5223	833.015
73.0648	0		69.5224	716.121
73.0649	0		69.5225	408.781
73.0649	0		69.5226	0
73.065	0		69.5227	0
73.0651	628.707		69.5227	0
73.0652	1918.69		69.5228	0
73.0653	4853.84		69.5244	0
73.0654	8468.58		69.5245	0
73.0654	12015.6		69.5246	0
73.0655	12638.3		69.5247	0
73.0656	9510.8		69.5248	583.507
73.0657	5624.27		69.5248	1026.25
73.0658	2004.18		69.5249	1226.36
73.0659	0		69.525	1018.47
73.0659	0		69.5251	558.9
73.066	0		69.5251	0
73.0661	0		69.5252	0
73.0662	0		69.5253	0
73.084	0		69.5254	0
73.0841	0		69.5381	0
73.0842	0		69.5381	0
73.0843	0		69.5382	0
73.0844	97.2904		69.5383	0
73.0845	2422.57		69.5384	343.373
73.0845	5910.84		69.5384	801.763
73.0846	9790.83		69.5385	1112.81
73.0847	12957.8		69.5386	1052.74
73.0848	13070.7		69.5387	673.954
73.0849	10157.1		69.5388	0
73.085	6210.88		69.5388	0
73.085	2635.89		69.5389	478.572
73.0851	255.727		69.539	802.176
73.0852	0		69.5391	915.85
73.0853	0		69.5391	740.115
73.0854	0		69.5392	405.538
73.0855	0		69.5393	0
73.0994	0		69.5394	0
73.0995	0		69.5395	0
73.0995	0		69.5395	0
73.0996	0		69.5533	0
73.0997	636.539		69.5534	0
73.0998	957.68		69.5535	0
73.0999	1035.47		69.5535	0
73.1	841.647		69.5536	546.157
73.1	485.828		69.5537	829.565
73.1001	0		69.5538	888.547
73.1002	0		69.5539	690.836
73.1003	0		69.5539	367.681
73.1004	0		69.554	0
73.1222	0		69.5541	0
73.1223	0		69.5542	0
73.1224	0		69.5542	0
73.1224	0		69.5638	0
73.1225	803.006		69.5639	0
73.1226	1112.85		69.564	0
73.1227	1120.92		69.5641	0
73.1228	846.857		69.5641	545.954
73.1229	465.805		69.5642	878.938
73.123	0		69.5643	943.739
73.123	0		69.5644	700.375
73.1231	0		69.5644	319.399
73.1232	0		69.5645	0
73.1318	0		69.5646	0
73.1318	0		69.5647	0
73.1319	0		69.5648	0
73.132	0		69.5955	0
73.1321	529.728		69.5956	0
73.1322	916.127		69.5957	0
73.1323	1067.02		69.5958	0
73.1324	868.399		69.5958	342.597
73.1324	431.588		69.5959	688.301
73.1325	0		69.596	855.992
73.1326	0		69.5961	723.37
73.1327	0		69.5962	393.187
73.1328	0		69.5962	0
73.1397	0		69.5963	0
73.1397	0		69.5964	0
73.1398	0		69.5965	0
73.1399	0		69.9407	0
73.14	433.184		69.9407	0
73.1401	873.52		69.9408	0
73.1402	1082.62		69.9409	0
73.1402	910.814		69.941	481.96
73.1403	488.448		69.9411	797.646
73.1404	0		69.9411	877.47
73.1405	0		69.9412	689.991
73.1406	0		69.9413	377.308
73.1407	0		69.9414	0
73.1457	0		69.9415	0
73.1458	0		69.9415	0
73.1459	0		69.9416	0
73.1459	0		70.0651	0
73.146	422.016		70.0652	0
73.1461	950.451		70.0653	0
73.1462	1204.58		70.0653	0
73.1463	1019.79		70.0654	0
73.1464	556.26		70.0655	1043.58
73.1465	0		70.0656	5433.43
73.1465	0		70.0657	16288
73.1466	0		70.0657	35281.4
73.1467	0		70.0658	55813.1
73.1513	0		70.0659	63542.7
73.1514	0		70.066	46220.4
73.1515	0		70.0661	26468.5
73.1516	0		70.0661	9334.72
73.1517	482.86		70.0662	2307.24
73.1517	926.782		70.0663	0
73.1518	1137.1		70.0664	0
73.1519	977.91		70.0664	0
73.152	558.372		70.0665	0
73.1521	0		70.0666	0
73.1522	0		70.4567	0
73.1522	0		70.4568	0
73.1523	0		70.4568	0
73.154	0		70.4569	0
73.1541	0		70.457	312.93
73.1542	0		70.4571	679.734
73.1543	0		70.4571	910.718
73.1543	723.727		70.4572	849.8
73.1544	1110.31		70.4573	538.594
73.1545	1207.89		70.4574	0
73.1546	948.896		70.4575	0
73.1547	498.563		70.4575	0
73.1548	0		70.4576	0
73.1549	0		70.6818	0
73.1549	0		70.6818	0
73.155	0		70.6819	0
73.1555	0		70.682	0
73.1556	0		70.6821	660.699
73.1557	0		70.6822	1165.69
73.1558	0		70.6822	1527.31
73.1559	628.779		70.6823	1512.55
73.1559	1078.95		70.6824	1131.75
73.156	1194.59		70.6825	647.67
73.1561	916.627		70.6826	0
73.1562	462.53		70.6826	0
73.1563	0		70.6827	573.658
73.1564	0		70.6828	930.651
73.1564	0		70.6829	1208.45
73.1565	0		70.6829	1203.99
73.1612	0		70.683	869.53
73.1613	0		70.6831	399.721
73.1614	0		70.6832	0
73.1615	0		70.6833	0
73.1616	391.41		70.6833	0
73.1617	871.755		70.6834	0
73.1617	1274.3		71.0492	0
73.1618	1388.88		71.0492	0
73.1619	1144.69		71.0493	0
73.162	675.728		71.0494	0
73.1621	0		71.0495	332.881
73.1622	0		71.0496	791.896
73.1622	0		71.0496	1419.71
73.1623	0		71.0497	1945.9
73.1643	0		71.0498	2161.72
73.1643	0		71.0499	2044.55
73.1644	0		71.05	1680.3
73.1645	0		71.05	1172.07
73.1646	439.133		71.0501	644.696
73.1647	924.507		71.0502	0
73.1648	1200.45		71.0503	0
73.1648	1008.7		71.0504	0
73.1649	451.36		71.0504	0
73.165	0		71.0606	0
73.1651	0		71.0607	0
73.1652	0		71.0607	0
73.1653	0		71.0608	0
73.1736	0		71.0609	472.885
73.1737	0		71.061	918.638
73.1737	0		71.0611	1212.66
73.1738	0		71.0611	1152
73.1739	706.821		71.0612	765.981
73.174	1064.69		71.0613	313.378
73.1741	1193.6		71.0614	0
73.1742	949.955		71.0615	0
73.1743	452.573		71.0615	0
73.1743	0		71.0616	0
73.1744	0		71.0687	0
73.1745	0		71.0688	0
73.1746	0		71.0689	0
73.1835	0		71.0689	0
73.1836	0		71.069	394.849
73.1837	0		71.0691	1002.98
73.1837	0		71.0692	1631.61
73.1838	621.328		71.0693	1834.48
73.1839	1064.74		71.0693	1432.42
73.184	1251.91		71.0694	725.008
73.1841	1052.04		71.0695	178.165
73.1842	592.932		71.0696	0
73.1843	0		71.0697	0
73.1843	0		71.0697	0
73.1844	0		71.0698	0
73.1845	0		71.6976	0
73.1875	0		71.6977	0
73.1876	0		71.6978	0
73.1877	0		71.6979	0
73.1878	0		71.6979	468.279
73.1879	565.489		71.698	843.015
73.1879	1044.36		71.6981	961.109
73.188	1173.33		71.6982	755.173
73.1881	862.756		71.6983	393.858
73.1882	433.001		71.6983	0
73.1883	378.761		71.6984	0
73.1884	884.067		71.6985	0
73.1885	1588.69		71.6986	0
73.1885	1901.45		72.0444	0
73.1886	1554.56		72.0445	0
73.1887	817.334		72.0446	0
73.1888	0		72.0447	0
73.1889	0		72.0447	356.998
73.189	0		72.0448	871.548
73.189	568.884		72.0449	1549.51
73.1891	899.93		72.045	2100.83
73.1892	1045.98		72.0451	2191.5
73.1893	958.669		72.0451	1736.79
73.1894	684.759		72.0452	1014.86
73.1895	0		72.0453	426.187
73.1895	0		72.0454	0
73.1896	0		72.0455	0
73.1897	0		72.0456	0
73.1898	723.655		72.0456	0
73.1899	1010.49		72.0564	0
73.19	1080.99		72.0565	0
73.19	919.245		72.0566	0
73.1901	604.398		72.0566	0
73.1902	0		72.0567	378.236
73.1903	0		72.0568	724.545
73.1904	0		72.0569	947.583
73.1905	0		72.057	922.92
73.1926	0		72.0571	675.268
73.1927	0		72.0571	0
73.1927	0		72.0572	0
73.1928	0		72.0573	0
73.1929	362.226		72.0574	0
73.193	908.58		72.0697	0
73.1931	1302.43		72.0698	0
73.1932	1302.21		72.0699	0
73.1932	960.882		72.0699	0
73.1933	504.814		72.07	452.762
73.1934	0		72.0701	891.684
73.1935	0		72.0702	1139.73
73.1936	0		72.0703	1022.72
73.1937	0		72.0704	640.521
73.1959	0		72.0704	0
73.196	0		72.0705	0
73.1961	0		72.0706	0
73.1962	0		72.0707	0
73.1963	370.392		72.0805	0
73.1964	897.164		72.0805	0
73.1964	1191.6		72.0806	0
73.1965	1026.54		72.0807	0
73.1966	523.433		72.0808	0
73.1967	0		72.0809	0
73.1968	0		72.0809	0
73.1969	472.611		72.081	0
73.1969	962.908		72.0811	0
73.197	1132.91		72.0812	17069.1
73.1971	862.075		72.0813	66904.8
73.1972	380.346		72.0813	153183
73.1973	0		72.0814	246339
73.1974	0		72.0815	268610
73.1974	0		72.0816	183592
73.1975	0		72.0817	97003.7
73.1983	0		72.0818	30904.7
73.1984	0		72.0818	10380.1
73.1985	0		72.0819	5648.15
73.1985	0		72.082	2632.4
73.1986	395.201		72.0821	0
73.1987	848.716		72.0822	0
73.1988	1046.2		72.0823	0
73.1989	865.305		72.0823	0
73.199	439.593		72.0824	0
73.199	0		72.092	0
73.1991	0		72.092	0
73.1992	0		72.0921	0
73.1993	0		72.0922	0
73.203	0		72.0923	298.835
73.2031	0		72.0924	713.01
73.2032	0		72.0924	989.197
73.2032	0		72.0925	917.256
73.2033	658.258		72.0926	549.312
73.2034	1205.35		72.0927	0
73.2035	1391.71		72.0928	0
73.2036	1075.56		72.0929	0
73.2037	479.485		72.0929	0
73.2037	0		72.0997	0
73.2038	0		72.0998	0
73.2039	0		72.0998	0
73.204	0		72.0999	0
73.2069	0		72.1	687.406
73.207	0		72.1001	988.029
73.2071	0		72.1002	1094.31
73.2072	0		72.1003	914.463
73.2073	804.827		72.1003	527.118
73.2074	1206.18		72.1004	0
73.2074	1325		72.1005	0
73.2075	1123.59		72.1006	0
73.2076	725.948		72.1007	0
73.2077	0		72.116	0
73.2078	0		72.1161	0
73.2079	0		72.1162	0
73.208	0		72.1163	0
73.2099	0		72.1164	685.294
73.21	0		72.1164	870.913
73.2101	0		72.1165	911.793
73.2101	0		72.1166	788.091
73.2102	783.103		72.1167	554.992
73.2103	1394.96		72.1168	0
73.2104	1588.4		72.1168	0
73.2105	1206.29		72.1169	422.64
73.2106	597.355		72.117	793.699
73.2106	0		72.1171	1145.62
73.2107	0		72.1172	1247.34
73.2108	0		72.1173	1027.79
73.2109	0		72.1173	615.608
73.2218	0		72.1174	0
73.2219	0		72.1175	0
73.222	0		72.1176	0
73.2221	0		72.1177	0
73.2222	405.002		72.127	0
73.2222	948.969		72.1271	0
73.2223	1226.64		72.1272	0
73.2224	1034.3		72.1273	0
73.2225	541.613		72.1274	521.625
73.2226	0		72.1275	732.76
73.2227	0		72.1275	836.607
73.2227	0		72.1276	749.154
73.2228	0		72.1277	483.392
73.223	0		72.1278	0
73.2231	0		72.1279	0
73.2232	0		72.1279	0
73.2233	0		72.128	0
73.2233	468.453		72.1372	0
73.2234	1058.76		72.1372	0
73.2235	1447.2		72.1373	0
73.2236	1347.04		72.1374	0
73.2237	813.267		72.1375	346.775
73.2238	0		72.1376	760.542
73.2238	0		72.1376	1263.58
73.2239	0		72.1377	1594.27
73.224	0		72.1378	1555.73
73.2282	0		72.1379	1169.87
73.2283	0		72.138	661.01
73.2284	0		72.1381	0
73.2285	0		72.1381	0
73.2286	670.841		72.1382	0
73.2286	1261.55		72.1383	0
73.2287	1632.77		72.1515	0
73.2288	1589.96		72.1515	0
73.2289	1164.18		72.1516	0
73.229	598.518		72.1517	0
73.2291	0		72.1518	467.221
73.2291	0		72.1519	805.009
73.2292	479.814		72.152	989.057
73.2293	914.836		72.152	941.834
73.2294	1175.21		72.1521	735.75
73.2295	1051.09		72.1522	478.972
73.2296	611.133		72.1523	0
73.2296	0		72.1524	0
73.2297	297.505		72.1525	0
73.2298	890.097		72.1525	0
73.2299	1629.89		72.171	0
73.23	2033.58		72.171	0
73.2301	1907.37		72.1711	0
73.2301	1421.72		72.1712	0
73.2302	869.147		72.1713	603.076
73.2303	430.544		72.1714	922.953
73.2304	0		72.1715	976.748
73.2305	0		72.1715	716.006
73.2306	0		72.1716	341.539
73.2307	0		72.1717	0
73.2352	0		72.1718	0
73.2353	0		72.1719	0
73.2354	0		72.172	0
73.2354	0		72.1733	0
73.2355	592.522		72.1733	0
73.2356	1097.08		72.1734	0
73.2357	1271.5		72.1735	0
73.2358	1030.74		72.1736	514.263
73.2359	566.417		72.1737	887.776
73.236	0		72.1738	1069.25
73.236	0		72.1738	968.177
73.2361	0		72.1739	673.997
73.2362	0		72.174	0
73.2464	0		72.1741	0
73.2465	0		72.1742	0
73.2466	0		72.1743	0
73.2466	0		72.1823	0
73.2467	316.858		72.1824	0
73.2468	866.868		72.1825	0
73.2469	1156.68		72.1826	0
73.247	912.657		72.1826	469.537
73.2471	342.729		72.1827	754.939
73.2471	0		72.1828	867.011
73.2472	0		72.1829	723.84
73.2473	0		72.183	422.347
73.2474	0		72.1831	0
73.2523	0		72.1831	0
73.2524	0		72.1832	0
73.2524	0		72.1833	445.561
73.2525	0		72.1834	740.811
73.2526	758.298		72.1835	944.352
73.2527	1133.92		72.1836	922.882
73.2528	1213.97		72.1836	664.29
73.2529	914.803		72.1837	0
73.2529	417.994		72.1838	0
73.253	0		72.1839	0
73.2531	0		72.184	0
73.2532	0		72.2241	0
73.2533	0		72.2242	0
73.254	0		72.2243	0
73.254	0		72.2244	0
73.2541	0		72.2245	501.842
73.2542	0		72.2246	978.434
73.2543	633.876		72.2246	1230.31
73.2544	1308.67		72.2247	1068.05
73.2545	1641.18		72.2248	627.619
73.2545	1402.6		72.2249	0
73.2546	805.551		72.225	0
73.2547	0		72.2251	541.046
73.2548	0		72.2251	848.9
73.2549	438.641		72.2252	932.669
73.255	902.224		72.2253	739.948
73.2551	1207.2		72.2254	401.54
73.2551	1112.51		72.2255	0
73.2552	650.857		72.2255	0
73.2553	0		72.2256	0
73.2554	0		72.2257	0
73.2555	0		72.2258	458.405
73.2556	0		72.2259	730.013
73.2985	0		72.226	881.444
73.2986	0		72.226	785.303
73.2987	0		72.2261	486.719
73.2987	0		72.2262	0
73.2988	596.572		72.2263	0
73.2989	1162.97		72.2264	532.635
73.299	1365.63		72.2265	931.39
73.2991	1072.67		72.2265	1143.33
73.2992	527.922		72.2266	1001.57
73.2992	0		72.2267	586.455
73.2993	0		72.2268	0
73.2994	0		72.2269	0
73.2995	0		72.227	0
73.309	0		72.227	0
73.3091	0		72.2387	0
73.3092	0		72.2387	0
73.3093	0		72.2388	0
73.3094	355.773		72.2389	0
73.3094	899.823		72.239	387.647
73.3095	1250.83		72.2391	722.329
73.3096	1142.05		72.2391	886.784
73.3097	644.458		72.2392	753.99
73.3097	0		72.2393	414.569
73.3098	0		72.2394	0
73.3099	0		72.2395	0
73.31	0		72.2396	0
74.0599	0		72.2396	0
74.06	0		72.2706	0
74.0601	0		72.2706	0
74.0602	0		72.2707	0
74.0602	411.019		72.2708	0
74.0603	6040.39		72.2709	350.542
74.0604	16292.4		72.271	719.354
74.0605	27340.7		72.271	938.253
74.0606	36856.7		72.2711	835.269
74.0607	34539.5		72.2712	484.848
74.0608	24165.4		72.2713	0
74.0608	13750.3		72.2714	0
74.0609	5699.76		72.2715	0
74.061	702.109		72.2715	0
74.0611	0		72.2737	0
74.0612	0		72.2738	0
74.0613	0		72.2738	0
74.0614	0		72.2739	0
74.085	0		72.274	671.742
74.0851	0		72.2741	1029.71
74.0852	0		72.2742	1077.06
74.0853	0		72.2743	762.26
74.0853	476.115		72.2743	325.275
74.0854	1171.87		72.2744	0
74.0855	1781.63		72.2745	0
74.0856	1927.74		72.2746	0
74.0857	1524.44		72.2747	0
74.0858	840.86		72.278	0
74.0858	253.451		72.2781	0
74.0859	0		72.2781	0
74.086	0		72.2782	0
74.0861	0		72.2783	372.574
74.0862	0		72.2784	759.013
74.096	0		72.2785	954.231
74.0961	0		72.2785	796.514
74.0962	0		72.2786	415.21
74.0963	0		72.2787	0
74.0964	737.404		72.2788	0
74.0965	1195.79		72.2789	0
74.0966	4642.35		72.279	0
74.0966	7719.37		73.0647	0
74.0967	14162.2		73.0648	0
74.0968	44414.8		73.0649	0
74.0969	140107		73.065	0
74.097	259204		73.0651	0
74.0971	370512		73.0652	1079.06
74.0972	328025		73.0652	3968.69
74.0972	201404		73.0653	8423.49
74.0973	84220.1		73.0654	13209.5
74.0974	21804.8		73.0655	15970.5
74.0975	5899.2		73.0656	13276
74.0976	4971.31		73.0657	8450.7
74.0977	2150.19		73.0657	3949.99
74.0978	0		73.0658	993.494
74.0978	0		73.0659	0
74.0979	0		73.066	0
74.098	0		73.0661	0
74.0981	0		73.0662	0
74.0982	0		73.0662	0
74.0983	0		73.0841	0
74.0983	0		73.0842	0
74.0984	0		73.0843	0
74.0985	0		73.0844	0
74.0986	0		73.0844	435.255
74.0987	0		73.0845	913.296
74.0988	0		73.0846	1512.22
74.1078	0		73.0847	2042.85
74.1079	0		73.0848	4002.47
74.108	0		73.0849	2375.6
74.1081	0		73.0849	2090.73
74.1082	499.82		73.085	1567.65
74.1083	926.188		73.0851	954.212
74.1084	1118.99		73.0852	445.126
74.1084	884.532		73.0853	0
74.1085	440.522		73.0853	0
74.1086	0		73.0854	0
74.1087	0		73.0855	0
74.1088	0		74.06	0
74.1089	0		74.0601	0
75.0553	0		74.0602	0
75.0554	0		74.0602	0
75.0555	0		74.0603	155.747
75.0556	0		74.0604	5285.8
75.0557	764.225		74.0605	16550.7
75.0558	1217.62		74.0606	30104.9
75.0559	1509.65		74.0607	43193.5
75.0559	1655.18		74.0608	41645.7
75.056	1727.44		74.0608	28349
75.0561	1671.76		74.0609	15411.1
75.0562	1363		74.061	5962.62
75.0563	829.912		74.0611	1287.49
75.0564	297.042		74.0612	0
75.0565	0		74.0613	0
75.0565	0		74.0614	0
75.0566	0		74.0615	0
75.0567	0		74.0615	0
75.0635	0		74.0684	0
75.0636	0		74.0685	0
75.0637	0		74.0686	0
75.0638	0		74.0686	0
75.0639	777.556		74.0687	480.654
75.064	1371.97		74.0688	772.531
75.0641	1564.23		74.0689	877.297
75.0641	1202.99		74.069	722.381
75.0642	547.804		74.0691	394.662
75.0643	0		74.0692	0
75.0644	0		74.0692	0
75.0645	0		74.0693	0
75.0646	0		74.0694	0
75.0998	0		74.0961	0
75.0999	0		74.0962	0
75.0999	0		74.0963	0
75.1	0		74.0964	0
75.1001	708.071		74.0965	0
75.1002	1455.16		74.0965	1980.06
75.1003	4824.13		74.0966	4656.3
75.1004	7156.79		74.0967	5055.18
75.1005	8013.99		74.0968	17913.3
75.1006	8180.8		74.0969	70107.5
75.1006	5466.3		74.097	169738
75.1007	2829.89		74.097	277445
75.1008	476.998		74.0971	315093
75.1009	0		74.0972	221268
75.101	0		74.0973	120137
75.1011	0		74.0974	38566.2
75.1012	0		74.0975	12647.8
76.0505	0		74.0976	6815.1
76.0505	0		74.0977	4059.25
76.0506	0		74.0977	814.216
76.0507	0		74.0978	542.393
76.0508	973.149		74.0979	0
76.0509	1304.23		74.098	0
76.051	1494.75		74.0981	0
76.0511	1544.1		74.0982	0
76.0512	1440.84		74.108	0
76.0513	1163.76		74.1081	0
76.0513	752.08		74.1082	0
76.0514	0		74.1083	0
76.0515	0		74.1084	255.139
76.0516	0		74.1084	714.844
76.0517	0		74.1085	1223.68
76.0756	0		74.1086	1476.99
76.0757	0		74.1087	1284.27
76.0757	0		74.1088	774.638
76.0758	0		74.1089	300.289
76.0759	851.013		74.1089	0
76.076	1497.19		74.109	0
76.0761	2038.58		74.1091	0
76.0762	2174.06		74.1092	0
76.0763	1811.04		74.8848	0
76.0764	1159.66		74.8849	0
76.0765	554.034		74.885	0
76.0765	0		74.8851	0
76.0766	0		74.8852	422.638
76.0767	0		74.8853	1015.45
76.0768	0		74.8854	1580.16
76.0879	0		74.8854	1742.85
76.088	0		74.8855	1398.99
76.0881	0		74.8856	804.64
76.0882	0		74.8857	323.183
76.0883	757.787		74.8858	0
76.0884	1848.5		74.8859	0
76.0885	2927.51		74.886	0
76.0886	5629.59		74.886	0
76.0887	3893.14		74.902	0
76.0887	1413.3		74.9021	0
76.0888	504.174		74.9021	0
76.0889	0		74.9022	0
76.089	0		74.9023	425.176
76.0891	0		74.9024	706.931
76.0892	0		74.9025	842.967
76.0895	0		74.9026	716.175
76.0895	0		74.9027	392.181
76.0896	0		74.9027	0
76.0897	0		74.9028	0
76.0898	889.756		74.9029	0
76.0899	1403.77		74.903	0
76.09	1523.23		74.9246	0
76.0901	1207.23		74.9247	0
76.0902	679.73		74.9248	0
76.0903	0		74.9249	0
76.0903	0		74.9249	492.995
76.0904	0		74.925	838.026
76.0905	0		74.9251	994.899
76.1111	0		74.9252	848.228
76.1112	0		74.9253	508.751
76.1113	0		74.9254	0
76.1114	0		74.9255	0
76.1115	850.374		74.9255	0
76.1116	1563.72		74.9256	0
76.1116	1951.01		74.9351	0
76.1117	1718.85		74.9352	0
76.1118	1033.45		74.9353	0
76.1119	0		74.9354	0
76.112	0		74.9355	371.14
76.1121	0		74.9356	730.109
76.1122	0		74.9356	883.56
76.134	0		74.9357	741.027
76.1341	0		74.9358	421.309
76.1342	0		74.9359	0
76.1343	0		74.936	0
76.1344	1116.11		74.9361	0
76.1345	1676.85		74.9362	0
76.1346	1919.66		74.9481	0
76.1346	1641.04		74.9482	0
76.1347	1009.3		74.9483	0
76.1348	0		74.9484	0
76.1349	0		74.9484	640.268
76.135	0		74.9485	913.522
76.1351	0		74.9486	1048.14
76.1879	0		74.9487	955.432
76.188	0		74.9488	671.003
76.1881	0		74.9489	0
76.1882	0		74.949	0
76.1883	873.708		74.9491	0
76.1883	1621.21		74.9491	676.786
76.1884	2051.58		74.9492	998.283
76.1885	1881.95		74.9493	1258.84
76.1886	1296.16		74.9494	1373.66
76.1887	686.486		74.9495	1245.46
76.1888	0		74.9496	872.92
76.1889	0		74.9497	427.388
76.189	0		74.9498	0
76.1891	0		74.9498	0
76.2573	0		74.9499	0
76.2574	0		74.95	0
76.2575	0		74.9504	0
76.2576	0		74.9505	0
76.2576	897.752		74.9506	0
76.2577	1569.33		74.9507	0
76.2578	1786.29		74.9508	303.313
76.2579	1386.33		74.9509	711.668
76.258	698.355		74.951	1031.2
76.2581	0		74.9511	1089.6
76.2582	0		74.9511	879.728
76.2583	0		74.9512	538.563
76.2584	0		74.9513	0
77.079	0		74.9514	0
77.0791	0		74.9515	0
77.0792	0		74.9516	0
77.0793	0		74.9534	0
77.0794	776.986		74.9535	0
77.0795	1994.09		74.9536	0
77.0796	4811.86		74.9537	0
77.0797	5183.25		74.9538	314.848
77.0798	3339.9		74.9538	735.368
77.0799	1510.93		74.9539	1136.56
77.0799	708.5		74.954	1229
77.08	0		74.9541	940.558
77.0801	0		74.9542	473.282
77.0802	0		74.9543	0
77.0803	0		74.9544	0
77.0909	0		74.9545	0
77.0909	0		74.9545	0
77.091	0		74.9546	0
77.0911	0		74.9547	0
77.0912	571.525		74.9548	0
77.0913	10070		74.9549	0
77.0914	16459.4		74.955	428.034
77.0915	28199.3		74.9551	774.329
77.0916	84144.5		74.9552	1031.91
77.0917	262372		74.9552	1060.79
77.0918	483723		74.9553	847.85
77.0918	688168		74.9554	494.444
77.0919	606444		74.9555	0
77.092	372191		74.9556	0
77.0921	155689		74.9557	0
77.0922	41945.1		74.9558	0
77.0923	12152.7		74.9652	0
77.0924	8791.05		74.9653	0
77.0925	1825.66		74.9653	0
77.0926	0		74.9654	0
77.0927	0		74.9655	587.132
77.0928	0		74.9656	870.782
77.0928	0		74.9657	952.614
77.0929	0		74.9658	792.722
77.093	0		74.9659	483.664
77.0931	0		74.966	0
77.0932	0		74.966	0
77.0933	0		74.9661	0
77.0934	0		74.9662	0
77.0935	0		74.9707	0
77.0936	0		74.9707	0
77.0937	0		74.9708	0
77.0938	0		74.9709	0
77.1033	0		74.971	316.063
77.1034	0		74.9711	706.477
77.1035	0		74.9712	1122.51
77.1036	0		74.9713	1367.18
77.1037	1079.62		74.9714	1325.67
77.1037	2217.13		74.9714	1038.25
77.1038	2816.41		74.9715	661.281
77.1039	1281.59		74.9716	0
77.104	0		74.9717	0
77.1041	0		74.9718	0
77.1042	0		74.9719	484.196
77.1043	1937.09		74.972	957.536
77.1044	2148.84		74.972	1517.02
77.1045	1527.66		74.9721	1882.02
77.1046	539.622		74.9722	1836.57
77.1047	0		74.9723	1419.43
77.1047	0		74.9724	874.093
77.1048	0		74.9725	443.893
77.1049	0		74.9726	0
77.591	0		74.9727	0
77.5911	0		74.9727	0
77.5912	0		74.9728	0
77.5913	0		74.9734	0
77.5914	1119.53		74.9734	0
77.5914	1659.84		74.9735	0
77.5915	1756.59		74.9736	0
77.5916	1360.18		74.9737	351.441
77.5917	762.725		74.9738	774.729
77.5918	0		74.9739	1129.52
77.5919	0		74.974	1188.24
77.592	0		74.9741	915.074
77.5921	0		74.9741	507.438
77.9279	0		74.9742	0
77.928	0		74.9743	0
77.9281	0		74.9744	0
77.9282	0		74.9745	0
77.9283	591.221		74.9763	0
77.9284	1291.99		74.9764	0
77.9284	1977.46		74.9765	0
77.9285	2281.96		74.9766	0
77.9286	2035.47		74.9767	514.514
77.9287	1350.01		74.9768	826.025
77.9288	634.476		74.9768	952.438
77.9289	0		74.9769	869.638
77.929	931.59		74.977	628.852
77.9291	1783.43		74.9771	0
77.9292	2211.44		74.9772	0
77.9293	1814.96		74.9773	0
77.9294	1003.13		74.9774	0
77.9295	0		74.9916	0
77.9296	0		74.9917	0
77.9297	0		74.9917	0
77.9297	0		74.9918	0
77.9298	0		74.9919	444.128
77.9299	959.009		74.992	827.322
77.93	1624.21		74.9921	975.131
77.9301	1945.03		74.9922	796.525
77.9302	1555.65		74.9923	432.151
77.9303	742.491		74.9924	0
77.9304	0		74.9924	0
77.9305	0		74.9925	0
77.9306	0		74.9926	0
77.9307	0		74.9927	0
78.9555	0		74.9928	0
78.9556	0		74.9929	0
78.9557	0		74.993	300.371
78.9557	0		74.9931	787.312
78.9558	598.139		74.9931	1182.56
78.9559	1357.71		74.9932	1254.13
78.956	3256.87		74.9933	998.155
78.9561	5353.25		74.9934	601.651
78.9562	6048.62		74.9935	0
78.9563	5482		74.9936	0
78.9564	2126.06		74.9937	426.687
78.9565	1197.76		74.9937	707.418
78.9566	0		74.9938	959.422
78.9567	0		74.9939	1154.49
78.9568	0		74.994	1302.06
78.9569	0		74.9941	1345.36
79.2227	0		74.9942	1194.57
79.2228	0		74.9943	860.136
79.2229	0		74.9944	507.221
79.223	0		74.9944	0
79.2231	765.075		74.9945	551.738
79.2232	1336.86		74.9946	991.674
79.2233	1540		74.9947	1399.8
79.2234	1244.67		74.9948	1478.63
79.2235	692.139		74.9949	1150.51
79.2236	0		74.995	617.328
79.2237	0		74.9951	0
79.2237	0		74.9951	0
79.2238	0		74.9952	0
79.242	0		74.9953	0
79.2421	0		74.9998	0
79.2422	0		74.9999	0
79.2423	0		75	0
79.2424	1116.43		75.0001	0
79.2425	1521.13		75.0002	543.369
79.2426	1597.7		75.0003	872.097
79.2427	1349.77		75.0004	1078.66
79.2428	921.351		75.0005	1013.89
79.2429	0		75.0005	690.662
79.243	0		75.0006	0
79.2431	0		75.0007	0
79.2431	0		75.0008	0
79.2477	0		75.0009	0
79.2478	0		75.0047	0
79.2479	0		75.0048	0
79.248	0		75.0049	0
79.2481	838.538		75.005	0
79.2482	1687.77		75.0051	540.796
79.2483	2352.44		75.0052	852.682
79.2484	2340.51		75.0053	960.037
79.2485	1644.42		75.0053	764.444
79.2485	797.359		75.0054	409.782
79.2486	0		75.0055	0
79.2487	0		75.0056	0
79.2488	0		75.0057	462.989
79.2489	0		75.0058	827.103
79.2559	0		75.0059	1101.69
79.256	0		75.006	1136.21
79.2561	0		75.006	893.078
79.2562	0		75.0061	499.61
79.2563	713.922		75.0062	0
79.2564	1371.9		75.0063	0
79.2565	1703.85		75.0064	0
79.2566	1488.82		75.0065	0
79.2567	911.246		75.0093	0
79.2568	0		75.0094	0
79.2569	0		75.0094	0
79.257	0		75.0095	0
79.2571	0		75.0096	452.936
79.2729	0		75.0097	762.325
79.273	0		75.0098	954.477
79.2731	0		75.0099	911.715
79.2732	0		75.01	658.04
79.2733	1134.31		75.0101	0
79.2734	1985.25		75.0101	0
79.2735	2337.33		75.0102	0
79.2735	1903.55		75.0103	0
79.2736	1088.97		75.0124	0
79.2737	0		75.0125	0
79.2738	0		75.0126	0
79.2739	0		75.0127	0
79.274	0		75.0128	556.171
79.2851	0		75.0128	895.385
79.2852	0		75.0129	1032.15
79.2853	0		75.013	885.244
79.2854	0		75.0131	552.063
79.2855	805.95		75.0132	0
79.2856	1631.04		75.0133	0
79.2857	2169.46		75.0134	0
79.2858	1992.45		75.0135	0
79.2859	1239.91		75.0162	0
79.286	517.813		75.0162	0
79.2861	0		75.0163	0
79.2861	0		75.0164	0
79.2862	0		75.0165	276.16
79.2863	0		75.0166	738.022
79.2867	0		75.0167	1244.54
79.2868	0		75.0168	1417.23
79.2869	0		75.0169	1067.72
79.287	0		75.0169	446.665
79.2871	867.915		75.017	0
79.2872	1499.29		75.0171	0
79.2873	1836.96		75.0172	0
79.2874	1690.16		75.0173	0
79.2875	1175		75.0188	0
79.2876	0		75.0189	0
79.2877	0		75.0189	0
79.2878	0		75.019	0
79.2879	0		75.0191	407.536
79.299	0		75.0192	740.991
79.2991	0		75.0193	927.567
79.2992	0		75.0194	883.439
79.2993	0		75.0195	671.833
79.2994	937.184		75.0196	0
79.2995	1531.37		75.0196	0
79.2996	1724.81		75.0197	0
79.2997	1361.12		75.0198	0
79.2998	713.441		75.0229	0
79.2999	0		75.023	0
79.3	0		75.023	0
79.3001	0		75.0231	0
79.3002	0		75.0232	486.645
79.3196	0		75.0233	829.106
79.3197	0		75.0234	1022.9
79.3198	0		75.0235	926.892
79.3199	0		75.0236	594.003
79.32	1051.26		75.0237	0
79.3201	1693.56		75.0237	0
79.3202	1964.66		75.0238	0
79.3203	1665.59		75.0239	0
79.3204	1012.14		75.0254	0
79.3205	0		75.0255	0
79.3206	0		75.0256	0
79.3206	0		75.0257	0
79.3207	0		75.0257	521.238
79.3281	0		75.0258	1011.47
79.3282	0		75.0259	1145.16
79.3283	0		75.026	849.151
79.3284	0		75.0261	401.465
79.3285	572.582		75.0262	0
79.3286	1324		75.0263	0
79.3287	1913.31		75.0264	0
79.3288	1850.48		75.0264	0
79.3289	1182.48		75.0324	0
79.329	0		75.0325	0
79.3291	0		75.0325	0
79.3292	0		75.0326	0
79.3293	0		75.0327	522.473
79.3303	0		75.0328	740.941
79.3304	0		75.0329	864.073
79.3305	0		75.033	855.677
79.3306	0		75.0331	707.189
79.3307	756.608		75.0332	437.394
79.3308	1248.86		75.0332	0
79.3309	1541.31		75.0333	0
79.331	1481.1		75.0334	0
79.3311	1080.36		75.0335	0
79.3312	0		75.038	0
79.3313	0		75.038	0
79.3314	0		75.0381	0
79.3315	0		75.0382	0
79.334	0		75.0383	358.813
79.3341	0		75.0384	790.318
79.3342	0		75.0385	989.841
79.3343	0		75.0386	778.487
79.3344	1110.99		75.0387	345.518
79.3345	1752.5		75.0387	0
79.3346	2108.87		75.0388	0
79.3347	1935.71		75.0389	0
79.3348	1326.95		75.039	0
79.3349	686.864		75.0411	0
79.335	0		75.0412	0
79.3351	0		75.0413	0
79.3352	1127.25		75.0414	0
79.3353	1597.72		75.0414	463.074
79.3353	1833.51		75.0415	870.082
79.3354	1750.93		75.0416	1131.62
79.3355	1367.27		75.0417	1119.33
79.3356	813.016		75.0418	885.383
79.3357	0		75.0419	576.196
79.3358	0		75.042	0
79.3359	0		75.0421	0
79.336	0		75.0421	0
79.3558	0		75.0422	496.177
79.3559	0		75.0423	843.955
79.356	0		75.0424	1191.84
79.3561	0		75.0425	1375.02
79.3562	682.387		75.0426	1264.88
79.3563	1389.54		75.0427	889.086
79.3564	1759.34		75.0428	438.38
79.3565	1487.36		75.0428	0
79.3566	808.078		75.0429	0
79.3567	0		75.043	0
79.3568	0		75.0431	0
79.3569	0		75.05	0
79.357	0		75.0501	0
80.049	0		75.0502	0
80.0491	0		75.0503	0
80.0492	0		75.0503	309.736
80.0493	0		75.0504	833.237
80.0494	830.85		75.0505	1205.73
80.0495	4950.28		75.0506	1138.59
80.0496	7452.99		75.0507	687.836
80.0497	18125.6		75.0508	0
80.0498	57021.2		75.0509	0
80.0499	152349		75.051	0
80.05	255241		75.051	0
80.0501	316856		75.0552	0
80.0502	237890		75.0553	0
80.0503	136245		75.0554	0
80.0504	43222.6		75.0555	0
80.0505	10294		75.0556	0
80.0506	2131.83		75.0557	1101.64
80.0507	879.45		75.0558	2896.27
80.0508	0		75.0558	4870.45
80.0509	0		75.0559	6199
80.051	0		75.056	5984.71
80.051	0		75.0561	4760.97
80.9479	0		75.0562	2998.33
80.948	0		75.0563	761.693
80.9481	0		75.0564	236.777
80.9482	0		75.0565	0
80.9483	935.344		75.0565	0
80.9484	1807.12		75.0566	0
80.9484	2303.8		75.0567	0
80.9485	2101.44		75.0588	0
80.9486	1365.57		75.0589	0
80.9487	570.698		75.059	0
80.9488	0		75.0591	0
80.9489	0		75.0592	607.779
80.949	0		75.0592	1056.51
80.9491	0		75.0593	1285.34
81.0444	0		75.0594	1119.54
81.0445	0		75.0595	683.237
81.0446	0		75.0596	0
81.0447	0		75.0597	0
81.0448	407.811		75.0598	0
81.0449	1166.19		75.0599	0
81.045	3186.4		75.0616	0
81.0451	5247.12		75.0617	0
81.0452	5660.39		75.0618	0
81.0453	2841		75.0619	0
81.0454	1994.13		75.062	323.002
81.0455	1277.34		75.062	771.378
81.0456	845.201		75.0621	1313.12
81.0457	0		75.0622	1499.18
81.0458	0		75.0623	1192.16
81.0459	0		75.0624	643.687
81.046	0		75.0625	0
81.0526	0		75.0626	0
81.0526	0		75.0627	0
81.0527	0		75.0627	0
81.0528	0		75.0635	0
81.0529	582.601		75.0636	0
81.053	1290.55		75.0637	0
81.0531	3658.15		75.0638	0
81.0532	6093		75.0639	357.887
81.0533	7348.45		75.064	803.087
81.0534	6898.73		75.064	1446.76
81.0535	6055.04		75.0641	1908.33
81.0536	2007.57		75.0642	1888.59
81.0537	1080.43		75.0643	1385.22
81.0538	511.333		75.0644	719.741
81.0539	0		75.0645	289.895
81.054	0		75.0646	0
81.0541	0		75.0647	0
81.0542	0		75.0647	0
82.065	0		75.0648	0
82.0651	0		75.0652	0
82.0652	0		75.0653	0
82.0653	0		75.0654	0
82.0654	611.135		75.0654	0
82.0655	1079.15		75.0655	510.651
82.0656	1397.93		75.0656	1060.16
82.0657	1452.71		75.0657	1452.73
82.0658	1273.09		75.0658	1365.24
82.0659	970.435		75.0659	842.181
82.066	653.485		75.066	284.563
82.0661	0		75.0661	0
82.0662	0		75.0661	0
82.0663	0		75.0662	0
82.0664	0		75.0663	0
82.5659	0		75.0819	0
82.566	0		75.0819	0
82.5661	0		75.082	0
82.5662	0		75.0821	0
82.5663	790.687		75.0822	418.885
82.5664	1101.73		75.0823	754.226
82.5665	1217.12		75.0824	981.954
82.5666	1082.51		75.0825	959.999
82.5667	731.582		75.0826	697.783
82.5668	0		75.0826	0
82.5669	0		75.0827	0
82.567	0		75.0828	0
82.5671	0		75.0829	0
82.583	0		75.0847	0
82.5831	0		75.0848	0
82.5833	0		75.0849	0
82.5834	0		75.085	0
82.5835	577.383		75.0851	327.053
82.5836	1151.91		75.0852	874.177
82.5837	1459.46		75.0853	1355.2
82.5838	1375.53		75.0854	1408.29
82.5839	1027.33		75.0854	1040.34
82.584	620.899		75.0855	552.006
82.5841	0		75.0856	0
82.5842	0		75.0857	0
82.5843	0		75.0858	0
82.5844	0		75.0859	0
82.5845	814.545		75.0861	0
82.5846	1113.24		75.0862	0
82.5847	1195.76		75.0863	0
82.5848	993.011		75.0864	0
82.5849	586.953		75.0865	426.35
82.585	0		75.0866	958.151
82.5851	0		75.0867	1361.3
82.5852	0		75.0867	1407.53
82.5853	0		75.0868	1098.33
82.6204	0		75.0869	643.023
82.6205	0		75.087	0
82.6206	0		75.0871	0
82.6207	0		75.0872	592.532
82.6208	431.437		75.0873	914.33
82.6209	1063.24		75.0874	1038.95
82.621	1578.26		75.0874	881.075
82.6211	1576.23		75.0875	533.003
82.6212	1029.58		75.0876	0
82.6213	365.134		75.0877	0
82.6214	0		75.0878	0
82.6215	0		75.0879	0
82.6216	0		75.0917	0
82.6217	0		75.0918	0
82.6285	0		75.0919	0
82.6286	0		75.092	0
82.6287	0		75.0921	459.725
82.6288	0		75.0922	1042.89
82.6289	632.62		75.0922	1806.18
82.629	1236.94		75.0923	3611.51
82.6291	1490.33		75.0924	3814.45
82.6292	1188.03		75.0925	2674.77
82.6293	571.884		75.0926	1249.79
82.6294	0		75.0927	594.264
82.6295	0		75.0928	0
82.6296	0		75.0929	0
82.6297	0		75.0929	0
82.6464	0		75.093	0
82.6465	0		75.0935	0
82.6466	0		75.0936	0
82.6467	0		75.0936	0
82.6468	917.422		75.0937	0
82.6469	1372.22		75.0938	500.75
82.647	1431.98		75.0939	838.688
82.6471	1169.47		75.094	958.595
82.6472	852.096		75.0941	769.539
82.6473	0		75.0942	403.79
82.6474	0		75.0943	0
82.6475	0		75.0943	0
82.6476	0		75.0944	0
82.6679	0		75.0945	0
82.668	0		75.0951	0
82.6681	0		75.0952	0
82.6682	0		75.0953	0
82.6683	644.855		75.0954	0
82.6684	1204.21		75.0955	366.484
82.6685	1461.7		75.0956	816.157
82.6686	1242.97		75.0957	1098.34
82.6687	698.474		75.0957	1003.5
82.6688	0		75.0958	629.151
82.6689	0		75.0959	0
82.669	0		75.096	0
82.6691	0		75.0961	0
82.6757	0		75.0962	0
82.6758	0		75.0997	0
82.6759	0		75.0998	0
82.676	0		75.0998	0
82.6761	555.523		75.0999	0
82.6762	1050.35		75.1	376.714
82.6763	1311.59		75.1001	932.681
82.6764	1075.96		75.1002	2707.25
82.6765	495.752		75.1003	4734.15
82.6766	0		75.1004	6804.1
82.6767	0		75.1005	7223.66
82.6768	0		75.1005	7012.17
82.6769	0		75.1006	4679.55
82.6841	0		75.1007	2436.31
82.6842	0		75.1008	476.205
82.6843	0		75.1009	0
82.6844	0		75.101	0
82.6845	423.112		75.1011	0
82.6846	1025.5		75.1012	0
82.6847	1490.75		75.1046	0
82.6848	1487.9		75.1047	0
82.6849	1049.05		75.1047	0
82.685	482.513		75.1048	0
82.6851	0		75.1049	332.094
82.6852	0		75.105	754.294
82.6853	0		75.1051	1072.2
82.6854	0		75.1052	1011.74
82.7359	0		75.1053	612.049
82.736	0		75.1054	0
82.7361	0		75.1054	0
82.7362	0		75.1055	0
82.7363	542.016		75.1056	0
82.7364	1173.11		75.1062	0
82.7365	1510.15		75.1063	0
82.7366	1248.94		75.1064	0
82.7367	600.939		75.1065	0
82.7368	0		75.1066	259.004
82.7369	0		75.1067	715.388
82.737	0		75.1067	1346.44
82.7371	0		75.1068	1720.55
83.0466	0		75.1069	1549.89
83.0467	0		75.107	967.485
83.0468	0		75.1071	423.315
83.0469	0		75.1072	0
83.047	545.118		75.1073	0
83.0471	1544.16		75.1074	0
83.0472	2498.47		75.1074	0
83.0473	2721.63		75.116	0
83.0474	2045.4		75.1161	0
83.0475	1009.34		75.1162	0
83.0476	285.257		75.1163	0
83.0477	0		75.1164	451.105
83.0478	0		75.1164	768.112
83.0479	0		75.1165	915.135
83.048	0		75.1166	771.056
83.0597	0		75.1167	424.885
83.0598	0		75.1168	0
83.0599	0		75.1169	0
83.06	0		75.117	0
83.0601	939.742		75.1171	0
83.0602	3106.89		75.1274	0
83.0603	7327.98		75.1275	0
83.0604	10999.8		75.1275	0
83.0605	18562.6		75.1276	0
83.0606	57298.8		75.1277	292.313
83.0607	182324		75.1278	792.74
83.0608	340857		75.1279	1156.96
83.0609	492476		75.128	1054.88
83.061	443300		75.1281	595.89
83.0611	274102		75.1282	0
83.0612	117632		75.1282	0
83.0613	31181.4		75.1283	0
83.0614	8393.2		75.1284	0
83.0615	6037.48		75.1372	0
83.0616	1230.59		75.1373	0
83.0617	3001.76		75.1374	0
83.0618	0		75.1375	0
83.0619	0		75.1376	360.939
83.062	0		75.1377	769.943
83.0621	0		75.1378	963.699
83.0622	0		75.1379	771.655
83.0736	0		75.1379	363.033
83.0737	0		75.138	0
83.0738	0		75.1381	0
83.0739	0		75.1382	0
83.074	373.347		75.1383	0
83.0741	984.543		75.1777	0
83.0742	1606.62		75.1778	0
83.0743	1838.09		75.1779	0
83.0744	1486.8		75.178	0
83.0745	855.688		75.1781	437.093
83.0746	0		75.1782	903.036
83.0747	846.33		75.1783	1142.87
83.0748	1413.08		75.1783	942.388
83.0749	1605.08		75.1784	466.201
83.075	1169.17		75.1785	0
83.0751	428.531		75.1786	0
83.0752	0		75.1787	0
83.0753	0		75.1788	0
83.0754	0		75.1892	0
83.0755	0		75.1893	0
84.0576	0		75.1894	0
84.0577	0		75.1895	0
84.0578	0		75.1895	394.209
84.0579	0		75.1896	816.082
84.058	605.105		75.1897	986.544
84.0581	1102.79		75.1898	744.271
84.0582	1260.82		75.1899	307.856
84.0583	981.929		75.19	0
84.0584	458.784		75.1901	0
84.0586	0		75.1901	0
84.0587	0		75.1902	0
84.0588	0		76.0393	0
84.0589	0		76.0394	0
84.0635	0		76.0395	0
84.0636	0		76.0396	0
84.0637	0		76.0397	371.457
84.0638	0		76.0398	713.388
84.0639	691.942		76.0399	935.855
84.064	3011.25		76.0399	920.091
84.0641	5559.29		76.04	684.75
84.0642	8498.88		76.0401	0
84.0643	9780.63		76.0402	0
84.0644	10283.6		76.0403	0
84.0645	7655.38		76.0404	0
84.0646	4485.61		76.0505	0
84.0647	1275.58		76.0506	0
84.0648	0		76.0507	0
84.0649	0		76.0508	0
84.065	0		76.0509	394.915
84.0651	0		76.051	941.914
84.0652	0		76.0511	1542.11
84.0806	0		76.0512	1853.3
84.0807	0		76.0512	1676.06
84.0808	0		76.0513	1134.51
84.0809	0		76.0514	549.078
84.081	414.625		76.0515	0
84.0811	1289.34		76.0516	0
84.0812	2394.63		76.0517	0
84.0813	5423.22		76.0518	0
84.0814	5528.21		76.0757	0
84.0815	3908.89		76.0758	0
84.0816	1569.35		76.0759	0
84.0817	640.065		76.076	0
84.0818	0		76.0761	648.106
84.0819	0		76.0762	1136.96
84.082	0		76.0763	1770.97
84.0821	0		76.0764	3987.82
85.0755	0		76.0764	4234.5
85.0756	0		76.0765	3442.91
85.0758	0		76.0766	1400.7
85.0759	0		76.0767	687.008
85.076	0		76.0768	0
85.0761	3278.2		76.0769	0
85.0762	10474.4		76.077	0
85.0763	30344.9		76.0771	0
85.0764	82258.6		76.0878	0
85.0765	139721		76.0878	0
85.0766	183376		76.0879	0
85.0767	147424		76.088	0
85.0768	87681.9		76.0881	407.569
85.0769	31307.3		76.0882	1213.62
85.077	6842.24		76.0883	2991.61
85.0771	0		76.0884	4864.28
85.0772	0		76.0885	6170.91
85.0773	0		76.0886	6165.4
85.0774	0		76.0886	5170.83
85.0775	0		76.0887	3229.62
86.0596	0		76.0888	1490.82
86.0597	0		76.0889	577.049
86.0598	0		76.089	0
86.0599	0		76.0891	0
86.06	0		76.0892	0
86.0602	3076.73		76.0893	0
86.0603	7452.84		76.0941	0
86.0604	12677.7		76.0942	0
86.0605	19235.1		76.0943	0
86.0606	23359.9		76.0944	0
86.0607	26242.3		76.0944	0
86.0608	21344.9		76.0945	2151.98
86.0609	12604.1		76.0946	6027.26
86.061	4177.56		76.0947	11538.9
86.0611	0		76.0948	17432.7
86.0612	0		76.0949	19633.5
86.0613	0		76.095	16258.4
86.0614	0		76.0951	10291
86.0615	0		76.0952	4905.59
86.0792	0		76.0952	1408.29
86.0793	0		76.0953	0
86.0794	0		76.0954	0
86.0795	0		76.0955	0
86.0797	820.689		76.0956	0
86.0798	1582.04		76.0957	0
86.0799	2554.61		76.3837	0
86.08	5677.87		76.3838	0
86.0801	5415		76.3839	0
86.0802	3237.8		76.384	0
86.0803	1209.38		76.3841	394.777
86.0804	0		76.3842	746.614
86.0805	0		76.3843	937.196
86.0806	0		76.3843	844.922
86.0807	0		76.3844	532.28
86.0834	0		76.3845	0
86.0835	0		76.3846	0
86.0836	0		76.3847	0
86.0837	0		76.3848	0
86.0838	578.053		77.0788	0
86.0839	1248.68		77.0789	0
86.0841	1946.12		77.079	0
86.0842	2297.32		77.0791	0
86.0843	2176.67		77.0792	494.096
86.0844	1751.26		77.0793	1039.65
86.0845	1316.92		77.0794	1448.2
86.0846	1084.51		77.0795	1415.07
86.0848	0		77.0796	967.03
86.0849	0		77.0797	500.959
86.085	0		77.0798	0
86.0851	0		77.0798	0
86.096	0		77.0799	0
86.0961	0		77.08	0
86.0962	0		77.09	0
86.0963	0		77.0901	0
86.0964	0		77.0902	0
86.0966	2168.4		77.0903	0
86.0967	8850.95		77.0904	0
86.0968	18976.4		77.0905	0
86.0969	32421.8		77.0906	0
86.097	46125.5		77.0907	0
86.0971	49804.8		77.0907	0
86.0972	39143.5		77.0908	0
86.0973	23691.3		77.0909	0
86.0974	9233.3		77.091	0
86.0975	224.323		77.0911	0
86.0976	0		77.0912	0
86.0977	0		77.0913	4292.62
86.0978	0		77.0914	8689.9
86.0979	0		77.0915	9054.83
86.3463	0		77.0916	30307.2
86.3464	0		77.0916	117623
86.3465	0		77.0917	279095
86.3466	0		77.0918	452958
86.3467	993.81		77.0919	506504
86.3468	1793.94		77.092	352467
86.347	2220.08		77.0921	189929
86.3471	1978.59		77.0922	61762.1
86.3472	1282.26		77.0923	21418.3
86.3473	0		77.0924	11888.8
86.3474	0		77.0925	6653.16
86.3475	0		77.0926	1078.67
86.3476	0		77.0926	261.557
86.3478	0		77.0927	0
86.3479	0		77.0928	0
86.348	0		77.0929	0
86.3481	0		77.093	0
86.3482	603.163		77.0931	0
86.3484	1405.8		77.0932	0
86.3485	1876.49		77.0933	0
86.3486	1742.36		77.0934	0
86.3487	1229.23		77.0935	0
86.3488	0		77.0936	0
86.3489	0		77.0937	0
86.349	0		77.0937	0
86.3491	0		77.1035	0
87.0437	0		77.1036	0
87.0438	0		77.1036	0
87.0439	0		77.1037	0
87.044	0		77.1038	666.035
87.0441	965.493		77.1039	1463.92
87.0442	1540.68		77.104	3126.24
87.0443	1865.14		77.1041	3677.23
87.0444	1850.49		77.1042	2561.57
87.0445	1726.28		77.1043	1163.43
87.0446	1690.79		77.1044	445.515
87.0447	1625.8		77.1045	0
87.0449	1337.9		77.1046	0
87.045	870.503		77.1046	0
87.0451	0		77.1047	0
87.0452	0		77.4466	0
87.0453	0		77.4467	0
87.0454	0		77.4468	0
87.0912	0		77.4469	0
87.0913	0		77.447	607.42
87.0915	0		77.4471	818.985
87.0916	0		77.4472	870.314
87.0917	0		77.4473	807.43
87.0918	3500.36		77.4474	675.946
87.0919	11094.3		77.4474	0
87.092	26667.3		77.4475	0
87.0921	48747.2		77.4476	0
87.0922	71679.9		77.4477	0
87.0923	74374.7		77.4574	0
87.0924	51098		77.4575	0
87.0925	27334.3		77.4576	0
87.0927	7716.21		77.4577	0
87.0928	0		77.4578	467.755
87.0928	0		77.4579	1066.76
87.0929	0		77.458	1349.51
87.093	0		77.4581	1099.18
87.0932	0		77.4581	610.223
88.0506	0		77.4582	0
88.0507	0		77.4583	0
88.0508	0		77.4584	0
88.0509	0		77.4585	0
88.051	763.105		77.4907	0
88.0511	1985.31		77.4908	0
88.0512	5720.29		77.4909	0
88.0513	6901.58		77.491	0
88.0514	4503.13		77.4911	295.581
88.0516	2210.43		77.4912	748.003
88.0517	35.9101		77.4913	981.813
88.0518	0		77.4914	741.228
88.0519	0		77.4915	267.857
88.052	0		77.4916	0
88.0521	0		77.4916	390.59
88.0604	0		77.4917	969.838
88.0606	0		77.4918	1351.05
88.0607	0		77.4919	1291.39
88.0608	0		77.492	900.896
88.0609	1102.63		77.4921	470.675
88.061	3403.39		77.4922	0
88.0611	8260.66		77.4923	0
88.0612	13584.3		77.4924	0
88.0613	15859.5		77.4925	0
88.0614	11251.3		77.5139	0
88.0616	6042.57		77.514	0
88.0617	1414.69		77.5141	0
88.0618	0		77.5142	0
88.0619	0		77.5143	662.217
88.062	0		77.5144	1174.15
88.0621	0		77.5144	1343.81
88.0622	0		77.5145	1140.77
88.074	0		77.5146	764.025
88.0741	0		77.5147	427.612
88.0742	0		77.5148	0
88.0743	0		77.5149	0
88.0744	0		77.515	640.22
88.0745	0		77.5151	983.753
88.0746	0		77.5152	1178.58
88.0747	0		77.5153	1102.33
88.0748	0		77.5154	788.268
88.075	9476.83		77.5155	392.756
88.0751	2589.42		77.5155	0
88.0752	0		77.5156	0
88.0753	8657.55		77.5157	0
88.0754	14297.4		77.5158	0
88.0755	32147.1		77.923	0
88.0756	50346.2		77.9231	0
88.0757	72566.6		77.9232	0
88.0758	212313		77.9233	0
88.076	699589		77.9234	304.925
88.0761	1.38106e+06		77.9235	889.615
88.0762	2.08614e+06		77.9235	1318.16
88.0763	2.00764e+06		77.9236	1209.61
88.0764	1274690		77.9237	672.225
88.0765	593090		77.9238	0
88.0766	161161		77.9239	0
88.0767	46417.5		77.924	0
88.0768	37247.2		77.9241	0
88.077	23061.2		77.9242	0
88.0771	5918.54		77.9243	0
88.0772	0		77.9244	0
88.0773	0		77.9245	465.772
88.0774	0		77.9246	857.344
88.0775	0		77.9247	975.337
88.0776	0		77.9248	745.542
88.0777	0		77.9248	373.208
88.0778	0		77.9249	0
88.0779	0		77.925	0
88.0781	0		77.9251	487.756
88.0782	0		77.9252	721.428
88.0783	0		77.9253	864.973
88.0784	0		77.9254	914.722
88.0785	0		77.9255	814.585
88.0786	0		77.9256	537.091
88.0787	0		77.9257	0
88.0788	0		77.9258	0
88.0792	0		77.9259	593.27
88.0793	0		77.926	982.337
88.0794	0		77.926	1052.1
88.0795	0		77.9261	734.401
88.0796	0		77.9262	281.59
88.0797	0		77.9263	0
88.0798	0		77.9264	0
88.0799	0		77.9265	0
88.0801	0		77.9266	0
88.0802	0		77.9267	0
88.0803	0		77.9268	0
88.0804	0		77.9269	0
88.0805	0		77.927	334.698
88.0806	0		77.9271	793.522
88.09	0		77.9271	1357.13
88.0902	0		77.9272	1773.93
88.0903	0		77.9273	1795.07
88.0904	0		77.9274	1405.68
88.0905	735.802		77.9275	854.973
88.0906	2716.71		77.9276	424.889
88.0907	7587.29		77.9277	0
88.0908	6579.9		77.9278	0
88.0909	2848.99		77.9279	0
88.091	0		77.928	0
88.0912	0		77.9451	0
88.0913	0		77.9452	0
88.0914	1106.18		77.9452	0
88.0915	3975.7		77.9453	0
88.0916	5388.74		77.9454	418.656
88.0917	2255.66		77.9455	790.085
88.0918	512.847		77.9456	1038.26
88.0919	0		77.9457	1001.16
88.092	0		77.9458	692.414
88.0921	0		77.9459	0
88.0923	0		77.946	0
88.1116	0		77.9461	0
88.1117	0		77.9462	0
88.1118	0		77.9497	0
88.1119	0		77.9498	0
88.112	378.111		77.9499	0
88.1121	2460.04		77.95	0
88.1122	4784.58		77.9501	679.945
88.1123	7284.1		77.9501	911.606
88.1125	7478.79		77.9502	960.898
88.1126	6980.13		77.9503	775.655
88.1127	5352.96		77.9504	441.851
88.1128	1750.72		77.9505	0
88.1129	913.263		77.9506	0
88.113	0		77.9507	0
88.1131	0		77.9508	0
88.1132	0		77.9551	0
88.1133	0		77.9552	0
89.0343	0		77.9553	0
89.0344	0		77.9554	0
89.0345	0		77.9555	421.104
89.0346	0		77.9556	786.873
89.0348	931.818		77.9557	1187.62
89.0349	1742.98		77.9558	1378.95
89.035	2197.32		77.9559	1190.09
89.0351	1977.18		77.956	697.16
89.0352	1291.09		77.9561	0
89.0353	0		77.9561	0
89.0354	0		77.9562	0
89.0355	0		77.9563	0
89.0357	0		77.9779	0
89.0597	0		77.978	0
89.0598	0		77.978	0
89.0599	0		77.9781	0
89.06	0		77.9782	511.621
89.0601	987.287		77.9783	789.027
89.0602	1444.63		77.9784	973.595
89.0604	1821.4		77.9785	976.615
89.0605	1849.92		77.9786	784.234
89.0606	1478.74		77.9787	479.941
89.0607	897.295		77.9788	0
89.0609	0		77.9789	0
89.061	0		77.979	0
89.0611	0		77.9791	0
89.0613	0		77.9857	0
89.0705	0		77.9858	0
89.0706	0		77.9859	0
89.0707	0		77.986	0
89.0709	0		77.9861	481.991
89.071	0		77.9862	843.698
89.0711	2124.88		77.9863	1146.75
89.0712	4991.65		77.9864	1257.73
89.0713	7627.41		77.9865	1120.25
89.0714	8823.71		77.9865	780.507
89.0715	9908.25		77.9866	385.451
89.0716	10799.7		77.9867	0
89.0718	8904.15		77.9868	0
89.0719	5413.2		77.9869	0
89.072	1713.19		77.987	0
89.0721	0		77.995	0
89.0721	0		77.9951	0
89.0722	0		77.9951	0
89.0724	0		77.9952	0
89.0725	0		77.9953	644.542
89.0786	0		77.9954	993.89
89.0787	0		77.9955	1047.8
89.0788	0		77.9956	835.77
89.0789	0		77.9957	521.336
89.079	222.598		77.9958	0
89.0791	5517.19		77.9959	0
89.0792	13708.5		77.996	0
89.0794	29268.9		77.9961	0
89.0795	47549.7		77.9994	0
89.0796	63516.5		77.9995	0
89.0797	57403.3		77.9996	0
89.0798	36734.3		77.9997	0
89.0799	17152.7		77.9998	596.919
89.08	3812.24		77.9999	1017.69
89.0801	0		78	1416.44
89.0802	0		78	1661.86
89.0803	0		78.0001	1633.65
89.0805	0		78.0002	1306.65
89.0806	0		78.0003	825.537
89.1068	0		78.0004	430.474
89.1069	0		78.0005	0
89.107	0		78.0006	0
89.1071	0		78.0007	0
89.1072	0		78.0008	647.92
89.1073	2310.51		78.0009	736.13
89.1074	10565.9		78.001	763.312
89.1075	26282.8		78.0011	759.917
89.1077	47228.7		78.0012	734.454
89.1078	68429.1		78.0012	644.187
89.1079	70795.7		78.0013	0
89.108	50058		78.0014	0
89.1081	28297.1		78.0015	0
89.1082	9866.86		78.0016	0
89.1083	733.106		78.0102	0
89.1084	0		78.0103	0
89.1085	0		78.0104	0
89.1086	0		78.0105	0
89.1088	0		78.0106	693.161
89.9518	0		78.0107	861.939
89.9519	0		78.0108	918.529
89.952	0		78.0109	825.116
89.9521	0		78.011	580.358
89.9523	787.822		78.011	0
89.9524	1336.72		78.0111	0
89.9525	1885.15		78.0112	0
89.9526	2076.59		78.0113	0
89.9527	1701.11		78.0199	0
89.9528	976.704		78.02	0
89.953	0		78.0201	0
89.9532	0		78.0202	0
89.9533	0		78.0203	345.334
89.9534	0		78.0204	794.121
90.0548	0		78.0205	1054.46
90.0549	0		78.0206	927.575
90.055	0		78.0207	536.497
90.0552	0		78.0208	0
90.0553	1157.2		78.0209	0
90.0554	5083.73		78.0209	0
90.0555	7595.21		78.021	0
90.0556	8932.65		78.0226	0
90.0557	7299.84		78.0227	0
90.0558	4474.61		78.0228	0
90.056	1636.35		78.0229	0
90.0561	0		78.023	285.521
90.0561	0		78.0231	737.204
90.0563	0		78.0232	1188.98
90.0564	0		78.0233	1383.57
90.0565	0		78.0233	1230.04
90.0909	0		78.0234	843.014
90.091	0		78.0235	441.751
90.0911	0		78.0236	0
90.0912	0		78.0237	0
90.0914	1169.22		78.0238	564.555
90.0915	7437.5		78.0239	867.516
90.0916	16558.7		78.024	1055.33
90.0917	30825.4		78.0241	1068.14
90.0918	47191.2		78.0242	911.786
90.0919	57827.1		78.0243	635.62
90.092	51161		78.0244	0
90.0922	32533.1		78.0245	0
90.0923	15051.5		78.0246	0
90.0924	2835.27		78.0246	0
90.0925	0		78.0294	0
90.0925	0		78.0295	0
90.0927	0		78.0295	0
90.0928	0		78.0296	0
90.0929	0		78.0297	526.497
92.0363	0		78.0298	925.552
92.0364	0		78.0299	1190.13
92.0365	0		78.03	1222.49
92.0366	0		78.0301	1034.76
92.0367	0		78.0302	718.839
92.0369	2702.61		78.0303	0
92.037	7295.02		78.0304	0
92.0371	13636.8		78.0305	0
92.0372	21278.6		78.0306	0
92.0373	26487		78.0345	0
92.0375	27510.6		78.0346	0
92.0376	19371.4		78.0347	0
92.0377	11035.4		78.0348	0
92.0378	3625.89		78.0349	401.436
92.0379	0		78.035	732.27
92.038	0		78.0351	890.952
92.0382	0		78.0352	854.008
92.0383	0		78.0353	678.448
92.0384	0		78.0354	0
92.0703	0		78.0355	0
92.0704	0		78.0356	0
92.0705	0		78.0357	563.096
92.0706	0		78.0357	956.082
92.0708	689.105		78.0358	1157.63
92.0709	1908.85		78.0359	977.378
92.071	5351.93		78.036	518.987
92.0711	5900.93		78.0361	0
92.0712	4180.45		78.0362	0
92.0714	2245.76		78.0363	0
92.0715	831.323		78.0364	0
92.0716	0		78.0589	0
92.0717	0		78.059	0
92.0718	0		78.0591	0
92.072	0		78.0592	0
92.1099	0		78.0592	444.755
92.11	0		78.0593	842.584
92.1101	0		78.0594	1010.55
92.1103	0		78.0595	858.579
92.1104	1016.78		78.0596	538.384
92.1105	1487		78.0597	0
92.1106	1822.99		78.0598	0
92.1107	1909.74		78.0599	0
92.1109	1620.85		78.06	0
92.111	1016.6		78.0623	0
92.1111	0		78.0624	0
92.1112	0		78.0625	0
92.1113	0		78.0626	0
92.1114	0		78.0627	371.882
93.9589	0		78.0628	864.523
93.959	0		78.0629	1183.07
93.9592	0		78.063	1071.98
93.9593	0		78.063	640.905
93.9594	710.272		78.0631	0
93.9595	1202.31		78.0632	0
[truncated: 16,132 more rows]

## Sheet: B
S03920 MS2 12C valine			S03920 MS2 13C valine			S03920 MS2 13C/15N valine
m/z	Intensity		m/z	Intensity		m/z	Intensity
49.5027	0		49.5027	0		49.5027	0
49.5029	0		49.5029	0		49.5029	0
49.5031	0		49.5031	0		49.5031	0
49.5033	0		49.5033	0		49.5033	0
54.1127	0		54.1127	0		50.5893	0
54.1129	0		54.1129	0		50.5895	0
54.1132	0		54.1132	0		50.5896	0
54.1134	0		54.1134	0		50.5898	0
54.1136	3522.24		54.1136	2207.13		50.59	2899.24
54.1138	5547.69		54.1138	3811.75		50.5902	4140.56
54.114	6433.4		54.114	4536.7		50.5904	4508.7
54.1142	5435.02		54.1142	3661.49		50.5906	3743.72
54.1144	3168.84		54.1144	1812.13		50.5908	2198.61
54.1146	0		54.1146	0		50.591	0
54.1149	0		54.1148	0		50.5912	0
54.1151	0		54.115	0		50.5914	0
54.1153	0		54.1153	0		50.5916	0
54.7624	0		58.0634	0		52.0812	0
54.7626	0		58.0636	0		52.0814	0
54.7628	0		58.0638	0		52.0816	0
54.763	0		58.0641	0		52.0818	0
54.7632	2107.72		58.0643	1782.39		52.082	2466.68
54.7635	3705.78		58.0645	4886.98		52.0822	4630.97
54.7637	4513.18		58.0648	8801.02		52.0824	5793.84
54.7639	3901.06		58.065	10989.1		52.0826	5126.74
54.7641	2274.53		58.0653	9898.45		52.0828	3105.74
54.7643	0		58.0655	6424.46		52.083	0
54.7646	0		58.0657	2884.59		52.0832	0
54.7648	0		58.066	0		52.0834	0
54.765	0		58.0662	0		52.0836	0
55.0533	0		58.0664	0		52.3199	0
55.0535	0		58.0667	0		52.3201	0
55.0538	0		58.9216	0		52.3203	0
55.054	0		58.9219	0		52.3205	0
55.0542	3188.57		58.9221	0		52.3207	2783.5
55.0544	13888.9		58.9224	0		52.3209	4548.83
55.0546	35270.2		58.9226	2732.75		52.3211	5144.21
55.0549	58537.3		58.9228	4587.42		52.3213	4194.59
55.0551	68506.5		58.9231	5009.09		52.3216	2363.07
55.0553	48703.5		58.9233	3625.53		52.3217	0
55.0555	26386.6		58.9236	1546.73		52.3219	0
55.0557	7348.6		58.9238	0		52.3221	0
55.056	1093.26		58.924	0		52.3223	0
55.0562	0		58.9243	0		53.8684	0
55.0564	0		58.9245	0		53.8687	0
55.0566	0		59.0666	0		53.8689	0
55.0568	0		59.0668	0		53.8691	0
55.689	0		59.0671	0		53.8693	2456.79
55.6892	0		59.0673	0		53.8695	4284.66
55.6894	0		59.0675	1748.86		53.8697	4943.6
55.6897	0		59.0678	10457.3		53.8699	3971.38
55.6899	2289.22		59.068	23981.8		53.8701	2083.18
55.6901	3771.95		59.0683	38263.1		53.8703	0
55.6903	4546.74		59.0685	38868.8		53.8705	0
55.6906	4075.96		59.0688	24860		53.8708	0
55.6908	2604.76		59.069	11557.6		53.871	0
55.691	0		59.0692	3071.31		57.0512	0
55.6912	0		59.0695	0		57.0514	0
55.6914	0		59.0697	0		57.0516	0
55.6917	0		59.07	0		57.0519	0
58.0643	0		59.0702	0		57.0521	1880.31
58.0645	0		64.3993	0		57.0523	4670.67
58.0648	0		64.3996	0		57.0526	7456.29
58.065	0		64.3999	0		57.0528	8469.64
58.0653	3297.08		64.4002	0		57.053	7016.33
58.0655	10834.7		64.4005	1436.95		57.0533	4140.96
58.0657	18642.5		64.4007	3710.34		57.0535	1562.04
58.066	22266.8		64.401	6085.06		57.0537	0
58.0662	16068.1		64.4013	6682.43		57.0539	0
58.0664	6304.75		64.4016	5046.5		57.0542	0
58.0667	2342.69		64.4018	2511.09		57.0544	0
58.0669	0		64.4021	0		58.9197	0
58.0671	0		64.4023	0		58.9199	0
58.0674	0		64.4026	0		58.9202	0
58.0676	0		64.4029	0		58.9204	0
58.9209	0		68.7771	0		58.9207	3386.73
58.9212	0		68.7775	0		58.9209	4008.91
58.9214	0		68.7778	0		58.9212	4613.15
58.9216	0		68.7781	0		58.9214	4686.25
58.9219	3317.97		68.7784	2576.47		58.9216	3722.65
58.9221	5993.07		68.7787	4191.72		58.9219	2046.28
58.9224	7620.07		68.779	4962.64		58.9221	0
58.9226	6745.62		68.7793	4428.93		58.9224	0
58.9229	3864.27		68.7796	2886.84		58.9226	0
58.9231	1084.79		68.7799	0		58.9228	0
58.9233	0		68.7802	0		59.0654	0
58.9235	0		68.7805	0		59.0656	0
58.9238	0		68.7808	0		59.0659	0
58.924	0		68.9677	0		59.0661	0
66.4379	0		68.968	0		59.0664	815.875
66.4382	0		68.9683	0		59.0666	5121.01
66.4385	0		68.9686	0		59.0669	10764.1
66.4388	0		68.9689	2002.05		59.0671	14987.2
66.4391	2584.15		68.9692	3948.98		59.0673	20559.2
66.4394	3986.24		68.9695	5276.44		59.0676	69145.4
66.4397	4464.56		68.9698	5263.31		59.0678	242291
66.44	3668.51		68.9702	4016.18		59.0681	482132
66.4403	2051.93		68.9705	2297.47		59.0683	729278
66.4405	0		68.9707	0		59.0686	699061
66.4408	0		68.9711	0		59.0688	443187
66.4411	0		68.9714	0		59.0691	205803
66.4414	0		68.9717	0		59.0693	58597.4
68.921	0		70.678	0		59.0695	19000.7
68.9213	0		70.6783	0		59.0698	13455.9
68.9216	0		70.6786	0		59.07	4895.51
68.9219	0		70.6789	0		59.0703	6048.85
68.9222	2032.88		70.6792	2118.29		59.0705	3224.76
68.9225	3569.64		70.6796	4256.08		59.0708	0
68.9228	4229.47		70.6799	6186.43		59.071	0
68.9231	3539.02		70.6802	6592.32		59.0712	0
68.9234	1929.24		70.6805	5057.13		59.0715	0
68.9237	0		70.6809	2560.76		59.5164	0
68.924	0		70.6812	0		59.5166	0
68.9243	0		70.6815	0		59.5168	0
68.9246	0		70.6818	0		59.5171	0
70.677	0		70.6821	0		59.5173	2526.36
70.6773	0		71.456	0		59.5176	4426.37
70.6777	0		71.4563	0		59.5178	5146.83
70.678	0		71.4566	0		59.5181	4178.12
70.6783	1321.9		71.4569	0		59.5183	2226.58
70.6786	3469.94		71.4573	2040.81		59.5186	0
70.6789	5811.17		71.4576	4455.37		59.5188	0
70.6793	7248.84		71.4579	5561.56		59.5191	0
70.6796	6829.53		71.4582	4236.2		59.5193	0
70.6799	4630.16		71.4586	1703.07		59.8662	0
70.6802	2039.28		71.4588	0		59.8664	0
70.6805	0		71.4592	0		59.8667	0
70.6808	0		71.4595	0		59.8669	0
70.6812	0		71.4598	0		59.8672	2492.99
70.6815	0		74.2858	0		59.8674	3815.64
71.5728	0		74.2861	0		59.8677	4399.26
71.5732	0		74.2865	0		59.8679	3887.31
71.5735	0		74.2868	0		59.8682	2482.39
71.5738	0		74.2872	2724.01		59.8684	0
71.5741	2166.88		74.2875	5312.67		59.8687	0
71.5745	3976.99		74.2879	5821.35		59.8689	0
71.5748	5008.38		74.2882	3970.79		59.8692	0
71.5751	4480.14		74.2885	1807.82		60.0559	0
71.5754	2760.8		74.2889	0		60.0561	0
71.5758	0		74.2892	3054.47		60.0564	0
71.5761	0		74.2896	4976		60.0566	0
71.5764	0		74.2899	5697.54		60.0569	2071.91
71.5767	0		74.2903	4950.73		60.0571	4123.77
71.6776	0		74.2906	3333.3		60.0574	5296.05
71.6779	0		74.2909	0		60.0576	4794.62
71.6783	0		74.2913	0		60.0579	3060.18
71.6786	0		74.2916	0		60.0581	0
71.6789	2501.76		74.292	0		60.0584	0
71.6793	4152.96		74.3515	0		60.0586	0
71.6796	4838.93		74.3518	0		60.0589	0
71.6799	4163.23		74.3522	0		61.063	0
71.6802	2556.03		74.3525	0		61.0633	0
71.6806	0		74.3529	2501.91		61.0635	0
71.6809	0		74.3532	4216.01		61.0638	0
71.6812	0		74.3535	5022.73		61.064	330.315
71.6815	0		74.3539	4289.54		61.0643	5170.11
72.0774	0		74.3542	2397.44		61.0645	19199.9
72.0777	0		74.3546	0		61.0648	36768.9
72.078	0		74.3549	0		61.0651	54136
72.0784	0		74.3553	0		61.0653	50059.1
72.0787	0		74.3556	0		61.0656	31092.2
72.079	0		74.3969	0		61.0658	13600.4
72.0794	0		74.3973	0		61.0661	2808.85
72.0797	11884		74.3976	0		61.0663	0
72.08	18862.2		74.398	0		61.0666	0
72.0804	53076.2		74.3983	2025.94		61.0668	0
72.0807	168480		74.3987	3637.09		61.0671	0
72.081	323953		74.399	4672.79		62.0581	0
72.0814	478845		74.3993	4432.82		62.0584	0
72.0817	445484		74.3997	2999.73		62.0587	0
72.082	278082		74.4	0		62.0589	0
72.0823	123371		74.4003	0		62.0592	1165.07
72.0827	31205		74.4006	0		62.0594	3621.24
72.083	7448.12		74.401	0		62.0597	6370.35
72.0833	6236.94		76.0855	0		62.06	7630.57
72.0837	3618.16		76.0859	0		62.0602	6364.09
72.084	6937.21		76.0862	0		62.0605	3447.71
72.0843	879.499		76.0866	0		62.0607	0
72.0846	0		76.087	768.507		62.061	0
72.0849	0		76.0873	8142.77		62.0613	0
72.0852	0		76.0877	35402.5		62.0615	0
72.0856	0		76.088	71605.1		62.775	0
74.4545	0		76.0884	107644		62.7753	0
74.4548	0		76.0887	100953		62.7755	0
74.4552	0		76.0891	64357.1		62.7758	0
74.4555	0		76.0894	31095.7		62.7761	1864.41
74.4559	3254		76.0898	10833.5		62.7763	3733.72
74.4562	5000.34		76.0902	4168.13		62.7766	4744.76
74.4566	5290.67		76.0905	3425.02		62.7769	4195.1
74.4569	3896.84		76.0909	0		62.7771	2513.69
74.4573	1819.42		76.0912	0		62.7774	0
74.4576	0		76.0916	0		62.7777	0
74.4579	0		76.0919	0		62.7779	0
74.4583	0		76.0923	0		62.7782	0
74.4586	0		76.0926	0		63.3135	0
74.4676	0		76.093	0		63.3138	0
74.468	0		76.0934	4718.61		63.314	0
74.4683	0		76.0937	30707		63.3143	0
74.4686	0		76.0941	104641		63.3146	1795.56
74.469	2108.43		76.0944	185388		63.3149	4169.05
74.4693	3703.15		76.0948	249266		63.3151	5498.92
74.4697	4755.78		76.0951	202803		63.3154	4832.29
74.47	4713.73		76.0955	121608		63.3157	2792.4
74.4704	3720.9		76.0958	46823.1		63.3159	0
74.4707	2347.64		76.0962	15289.6		63.3161	0
74.4711	0		76.0966	5841.67		63.3164	0
74.4714	0		76.0969	3145.05		63.3167	0
74.4717	0		76.0973	0		70.678	0
74.4721	0		76.0977	0		70.6783	0
74.5629	0		76.0981	0		70.6786	0
74.5633	0		76.0984	0		70.6789	0
74.5636	0		77.0894	0		70.6792	3776.33
74.564	0		77.0898	0		70.6796	5416.93
74.5643	2420.38		77.0902	0		70.6799	5899.06
74.5646	4441.13		77.0905	0		70.6802	4794.28
74.565	5403.36		77.0909	1783.02		70.6805	2673.19
74.5653	4604.31		77.0913	4724.98		70.6808	0
74.5657	2662.59		77.0916	7757.44		70.6812	0
74.566	0		77.092	8535.06		70.6815	0
74.5663	0		77.0923	6366.43		70.6818	0
74.5667	0		77.0927	2947.61		71.329	0
74.567	0		77.0931	0		71.3293	0
77.4413	0		77.0934	0		71.3297	0
77.4416	0		77.0938	0		71.33	0
77.442	0		77.0942	0		71.3303	2990.98
77.4424	0		77.2722	0		71.3306	4568.71
77.4427	2184.27		77.2725	0		71.331	4963.16
77.4431	3956.37		77.2729	0		71.3313	4093.24
77.4435	4788.05		77.2733	0		71.3316	2713.7
77.4438	4019.31		77.2736	1806.68		71.3319	0
77.4442	2241.09		77.274	3717.14		71.3322	0
77.4446	0		77.2744	4743.94		71.3325	0
77.4449	0		77.2747	4035.28		71.3329	0
77.4453	0		77.2751	2196.26		74.1177	0
77.4457	0		77.2755	0		74.118	0
77.4629	0		77.2758	0		74.1183	0
77.4632	0		77.2762	0		74.1187	0
77.4636	0		77.2765	0		74.119	3274.61
77.464	0		77.2868	0		74.1194	5090.99
77.4643	2685.06		77.2871	0		74.1197	5517.04
77.4647	4492.38		77.2875	0		74.1201	4232.09
77.4651	5045.81		77.2879	0		74.1204	2111.16
77.4654	4057.48		77.2882	1349.98		74.1207	0
77.4658	2291.62		77.2886	4391.02		74.1211	0
77.4662	0		77.2889	6393.92		74.1214	0
77.4665	0		77.2893	5714.85		74.1218	0
77.4669	0		77.2897	3200.92		74.2538	0
77.4673	0		77.29	0		74.2542	0
77.4731	0		77.2904	0		74.2545	0
77.4735	0		77.2908	0		74.2549	0
77.4738	0		77.2911	0		74.2552	2554.92
77.4742	0		77.343	0		74.2556	4813.33
77.4746	2620.46		77.3433	0		74.2559	5789.02
77.4749	4103.05		77.3437	0		74.2562	4783.91
77.4753	4797.88		77.344	0		74.2566	2654.04
77.4757	4681.46		77.3444	3387.56		74.2569	0
77.476	4051.59		77.3448	4346.83		74.2573	0
77.4764	3074.34		77.3452	4475.46		74.2576	0
77.4768	0		77.3455	3462.3		74.258	0
77.4771	0		77.3459	1804.96		74.3185	0
77.4775	0		77.3462	0		74.3188	0
77.4779	0		77.3466	0		74.3191	0
77.4896	0		77.347	0		74.3195	0
77.49	0		77.3473	0		74.3198	2589.84
77.4903	0		77.4687	0		74.3202	4989.09
77.4907	0		77.4691	0		74.3205	6474.63
77.4911	2059.46		77.4695	0		74.3209	5902.32
77.4914	3671.16		77.4698	0		74.3212	3639.44
77.4918	4497.39		77.4702	1848.59		74.3215	0
77.4922	3996.17		77.4706	3662.31		74.3219	0
77.4925	2424.96		77.4709	4581.35		74.3222	0
77.4929	0		77.4713	3813.9		74.3226	0
77.4933	0		77.4716	1869.71		74.4469	0
77.4936	0		77.472	0		74.4473	0
77.494	0		77.4724	0		74.4476	0
77.5167	0		77.4728	0		74.4479	0
77.5171	0		77.4731	0		74.4483	2468.83
77.5174	0		77.5237	0		74.4486	4534.55
77.5178	0		77.524	0		74.449	5573.71
77.5182	3412.96		77.5244	0		74.4493	4637.32
77.5185	5346.18		77.5248	0		74.4497	2392.26
77.5189	6142.21		77.5251	3016.24		74.45	0
77.5193	5316.43		77.5255	5220.36		74.4504	0
77.5196	3332.34		77.5259	5896.17		74.4507	0
77.52	0		77.5262	4515.9		74.451	0
77.5204	0		77.5266	2264.36		74.8861	0
77.5207	0		77.527	0		74.8864	0
77.5211	0		77.5273	1671.3		74.8868	0
77.5218	0		77.5277	3486.36		74.8871	0
77.5222	0		77.5281	4918.87		74.8875	1856.25
77.5226	0		77.5284	4910.13		74.8878	4213.18
77.5229	0		77.5288	3532.36		74.8882	5936.63
77.5233	2249.61		77.5292	1678.98		74.8885	5768.7
77.5237	3947.69		77.5295	0		74.8889	3922.4
77.524	5469.43		77.5299	0		74.8892	0
77.5244	6520.54		77.5302	0		74.8896	0
77.5248	6657.22		77.5306	0		74.8899	0
77.5251	5527.11		77.922	0		74.8902	0
77.5255	3502.53		77.9224	0		77.0771	0
77.5259	0		77.9228	0		77.0774	0
77.5262	0		77.9231	0		77.0778	0
77.5266	0		77.9235	3200.87		77.0782	0
77.527	0		77.9239	5468.96		77.0785	2419.22
77.5292	0		77.9243	7160.55		77.0789	4814.34
77.5295	0		77.9246	6893.15		77.0793	13703.6
77.5299	0		77.925	4613.83		77.0796	22518.1
77.5303	0		77.9254	1966.76		77.08	25734.5
77.5306	2386.22		77.9257	0		77.0804	18686.5
77.531	3793.71		77.9261	0		77.0807	10486.1
77.5314	4355.47		77.9265	0		77.0811	2017.07
77.5317	3660.05		77.9268	0		77.0814	0
77.5321	2065.38		79.5158	0		77.0818	0
77.5325	0		79.5162	0		77.0822	0
77.5328	0		79.5166	0		77.0825	0
77.5332	0		79.5169	0		77.0843	0
77.5336	0		79.5173	1619.22		77.0847	0
77.5709	0		79.5177	3502.16		77.0851	0
77.5713	0		79.5181	4611.42		77.0854	0
77.5717	0		79.5185	4221.79		77.0858	0
77.5721	0		79.5188	2694.65		77.0862	0
77.5724	2685.83		79.5192	0		77.0865	0
77.5728	4342.6		79.5196	0		77.0869	0
77.5731	5073.62		79.52	0		77.0873	0
77.5735	4189.24		79.5204	0		77.0876	0
77.5739	2227.18		80.0479	0		77.088	0
77.5742	0		80.0483	0		77.0883	0
77.5746	0		80.0487	0		77.0887	1871.15
77.575	0		80.0491	0		77.0891	25887.3
77.5753	0		80.0495	2715.51		77.0894	59316.4
77.9224	0		80.0499	4708.06		77.0898	95662.7
77.9228	0		80.0502	5871.28		77.0902	104250
77.9231	0		80.0506	5585.87		77.0905	271176
77.9235	0		80.051	4169.68		77.0909	958577
77.9239	2969.34		80.0514	2458.01		77.0912	2.20922e+06
77.9242	5572.52		80.0518	0		77.0916	3.56387e+06
77.9246	7808.18		80.0522	0		77.092	3.92862e+06
77.925	8005.78		80.0525	0		77.0923	2687899
77.9254	5761.27		80.0529	0		77.0927	1.40927e+06
77.9257	2564.23		80.3545	0		77.0931	416952
77.9261	0		80.3548	0		77.0934	122147
77.9264	0		80.3552	0		77.0938	76070
77.9268	0		80.3556	0		77.0942	52315.8
77.9272	0		80.356	3288.26		77.0945	20195.3
80.4842	0		80.3564	5481.91		77.0949	12442.4
80.4845	0		80.3568	5991.66		77.0952	0
80.4849	0		80.3572	4318.67		77.0956	0
80.4853	0		80.3576	1791.06		77.096	0
80.4857	2249.33		80.3579	0		77.0963	0
80.4861	3991.18		80.3583	0		77.0967	0
80.4865	4985.96		80.3587	0		77.0971	0
80.4869	4622.89		80.3591	0		77.0974	0
80.4873	3071.52		80.4202	0		77.0978	0
80.4876	0		80.4206	0		77.0982	0
80.488	0		80.421	0		77.0985	0
80.4884	0		80.4214	0		77.0989	0
80.4888	0		80.4218	2263.81		77.0992	0
80.6095	0		80.4222	5407.86		77.0996	0
80.6099	0		80.4226	7946.92		77.1	0
80.6103	0		80.423	7697.25		77.1003	0
80.6107	0		80.4233	4885.55		77.1007	0
80.6111	2125.79		80.4237	2048.62		77.1011	0
80.6114	4075.3		80.4241	0		77.1014	0
80.6118	4911.86		80.4245	0		77.1018	0
80.6122	3906.04		80.4249	0		77.1022	0
80.6126	1941.35		80.4253	0		77.1025	0
80.613	0		80.4547	0		77.1029	0
80.6134	0		80.4551	0		77.1032	0
80.6138	0		80.4555	0		77.1036	0
80.6142	0		80.4559	0		77.104	0
80.6678	0		80.4563	2495.02		77.1043	0
80.6682	0		80.4566	3974.63		77.1047	0
80.6686	0		80.457	4443.03		77.1051	0
80.669	0		80.4574	3518.37		77.1054	0
80.6694	3540.5		80.4578	1893.14		77.1058	0
80.6698	5729.85		80.4582	0		77.1062	0
80.6702	7099.1		80.4586	0		77.1065	0
80.6705	7070.49		80.459	0		77.1069	0
80.6709	5724.23		80.4594	0		77.1072	0
80.6713	3679.82		80.469	0		77.1727	0
80.6717	1803		80.4694	0		77.1731	0
80.6721	0		80.4698	0		77.1734	0
80.6725	0		80.4702	0		77.1738	0
80.6729	0		80.4706	2146.07		77.1742	2620.98
80.6733	0		80.471	4612.12		77.1745	3927.76
80.7141	0		80.4714	6547.67		77.1749	4814.16
80.7145	0		80.4718	6452.11		77.1753	4810.68
80.7149	0		80.4721	4170.38		77.1756	3994.68
80.7153	0		80.4725	1289.04		77.176	2748.27
80.7157	3420.66		80.4729	0		77.1763	0
80.7161	5769.36		80.4733	0		77.1767	0
80.7165	6705.75		80.4737	0		77.1771	0
80.7168	5563.59		80.4741	0		77.1774	0
80.7172	3101.8		80.4745	0		77.2456	0
80.7176	0		80.4749	1514.39		77.2459	0
80.718	0		80.4752	3593.17		77.2463	0
80.7184	0		80.4756	6688.29		77.2466	0
80.7188	0		80.476	8028.47		77.247	3508.34
80.7328	0		80.4764	6318.53		77.2474	5794.54
80.7332	0		80.4768	3072.91		77.2477	6302.31
80.7336	0		80.4772	0		77.2481	4448.99
80.734	0		80.4776	0		77.2485	1853.56
80.7344	2495.03		80.478	0		77.2488	0
80.7348	3872.62		80.4783	0		77.2492	0
80.7351	4628.48		80.5105	0		77.2496	0
80.7355	4433.15		80.5109	0		77.2499	0
80.7359	3477.53		80.5113	0		77.2517	0
80.7363	0		80.5117	0		77.2521	0
80.7367	0		80.5121	2719.9		77.2525	0
80.7371	0		80.5125	4178.62		77.2528	0
80.7375	0		80.5129	4726.66		77.2532	2359.35
80.7788	0		80.5132	3894.4		77.2536	4612.31
80.7792	0		80.5136	2249.37		77.2539	5501.54
80.7796	0		80.514	0		77.2543	4190.15
80.78	0		80.5144	0		77.2547	1783.58
80.7803	1911.09		80.5148	0		77.255	0
80.7807	3685.09		80.5152	0		77.2554	0
80.7811	4964.49		80.5478	0		77.2558	0
80.7815	4827.04		80.5482	0		77.2561	0
80.7819	3248.41		80.5485	0		77.2572	0
80.7823	0		80.5489	0		77.2576	0
80.7826	0		80.5493	2399.82		77.2579	0
80.783	0		80.5497	4750.51		77.2583	0
80.7834	0		80.5501	6050.23		77.2587	3274.43
83.9861	0		80.5505	5398.81		77.259	5265.72
83.9865	0		80.5509	3288.64		77.2594	6158.6
83.987	0		80.5513	0		77.2598	5150.24
83.9874	0		80.5516	0		77.2601	2853.85
83.9878	3272.61		80.552	0		77.2605	0
83.9882	4797.85		80.5524	0		77.2609	0
83.9886	5296.68		80.5606	0		77.2612	0
83.989	4536.65		80.561	0		77.2616	0
83.9894	2975.71		80.5614	0		77.2857	0
83.9898	0		80.5617	0		77.286	0
83.9903	0		80.5621	2713.45		77.2864	0
83.9907	0		80.5625	4826.61		77.2868	0
83.9911	0		80.5629	5644.44		77.2871	2491.27
84.0643	0		80.5633	4630.4		77.2875	4570.79
84.0647	0		80.5637	2556.07		77.2878	5939.95
84.0651	0		80.5641	0		77.2882	5637.79
84.0655	0		80.5645	0		77.2886	3786.04
84.0659	2591.81		80.5648	0		77.2889	0
84.0663	4149.95		80.5652	0		77.2893	0
84.0668	4932.25		80.566	0		77.2897	0
84.0672	4428.4		80.5664	0		77.29	0
84.0676	2924.79		80.5668	0		77.3229	0
84.068	0		80.5672	0		77.3232	0
84.0684	0		80.5676	1967.94		77.3236	0
84.0688	0		80.5679	3650.17		77.324	0
84.0692	0		80.5683	4386.39		77.3243	3433.74
84.1235	0		80.5687	3655.64		77.3247	5676.98
84.1239	0		80.5691	1998.98		77.3251	6065.5
84.1243	0		80.5695	0		77.3254	4294.1
84.1247	0		80.5699	0		77.3258	1801.98
84.1251	2047.73		80.5703	0		77.3262	0
84.1255	3907.17		80.5707	0		77.3265	0
84.126	4945.04		80.5726	0		77.3269	0
84.1264	4709.16		80.573	0		77.3273	0
84.1268	3510.29		80.5734	0		77.3291	0
84.1272	0		80.5738	0		77.3294	0
84.1276	0		80.5742	2690.69		77.3298	0
84.128	0		80.5746	4336.85		77.3302	0
84.1284	0		80.5749	4800.97		77.3305	3299.28
84.1703	0		80.5753	3684.47		77.3309	5259.53
84.1707	0		80.5757	1800.39		77.3313	5539.19
84.1711	0		80.5761	0		77.3316	4000.88
84.1715	0		80.5765	0		77.332	1912.34
84.172	2067.76		80.5769	0		77.3324	0
84.1724	3889.04		80.5773	0		77.3327	0
84.1728	5033.22		80.5932	0		77.3331	0
84.1732	4970.35		80.5936	0		77.3335	0
84.1736	3984.22		80.594	0		77.336	0
84.174	2734.73		80.5944	0		77.3364	0
84.1744	0		80.5947	1838.94		77.3367	0
84.1749	0		80.5951	4257.93		77.3371	0
84.1753	0		80.5955	6279.05		77.3375	1364.95
84.1757	0		80.5959	6717.76		77.3378	4082.36
84.1778	0		80.5963	5397.16		77.3382	5943.17
84.1782	0		80.5967	3222.57		77.3386	5329.47
84.1786	0		80.5971	0		77.3389	2850.86
84.179	0		80.5975	0		77.3393	0
84.1794	2280.61		80.5978	2555.1		77.3397	0
84.1798	4176.91		80.5982	4283.49		77.34	0
84.1803	5376.04		80.5986	5395.93		77.3404	0
84.1807	5163.41		80.599	5335.67		77.4658	0
84.1811	3782.78		80.5994	4288		77.4662	0
84.1815	0		80.5998	2761.07		77.4665	0
84.1819	0		80.6002	0		77.4669	0
84.1823	0		80.6006	0		77.4673	3121.76
84.1827	0		80.601	0		77.4676	5676.85
86.3388	0		80.6013	0		77.468	7270.92
86.3392	0		80.9787	0		77.4684	6686.71
86.3397	0		80.9791	0		77.4687	4250.75
86.3401	0		80.9795	0		77.4691	1859.28
86.3405	1768.39		80.9799	0		77.4694	0
86.341	4072.78		80.9803	1838.24		77.4698	0
86.3414	5796.53		80.9807	3695.47		77.4702	0
86.3418	5681.78		80.981	4687.53		77.4705	0
86.3423	3825.83		80.9814	4101.72		77.9231	0
86.3427	1991.26		80.9818	2359.13		77.9235	0
86.3431	2028.7		80.9822	0		77.9239	0
86.3435	3913.57		80.9826	0		77.9242	0
86.344	5699.3		80.983	0		77.9246	2090.21
86.3444	5565.04		80.9834	0		77.925	4129.73
86.3448	3593.63		83.805	0		77.9254	5722.84
86.3453	0		83.8054	0		77.9257	5656.24
86.3457	0		83.8059	0		77.9261	3861.65
86.3461	0		83.8063	0		77.9264	0
86.3465	0		83.8067	2553.56		77.9268	0
87.4915	0		83.8071	5234.89		77.9272	0
87.492	0		83.8075	6402.67		77.9275	0
87.4924	0		83.8079	4919.58		80.3502	0
87.4928	0		83.8083	2309.09		80.3506	0
87.4933	2825.13		83.8087	0		80.351	0
87.4937	4776.1		83.8092	3032.63		80.3514	0
87.4942	5227.07		83.8096	5672.4		80.3518	3882.87
87.4946	3880.09		83.81	6606.84		80.3521	5848.89
87.495	1890.39		83.8104	4950.23		80.3525	6434.88
87.4955	0		83.8108	2179.57		80.3529	5361.27
87.4959	0		83.8112	0		80.3533	3340.84
87.4963	0		83.8116	0		80.3537	0
87.4968	0		83.812	0		80.3541	0
87.5491	0		83.8124	0		80.3545	0
87.5495	0		83.8541	0		80.3548	0
87.55	0		83.8545	0		80.3931	0
87.5504	0		83.8549	0		80.3935	0
87.5509	1774.02		83.8553	0		80.3939	0
87.5513	3898.52		83.8557	3002.87		80.3943	0
87.5517	4996.78		83.8561	4833.72		80.3947	3770.4
87.5522	4025.37		83.8565	5590.34		80.3951	5291.69
87.5526	1841.25		83.8569	5006.66		80.3955	5703.97
87.5531	0		83.8574	3517.98		80.3959	4467.1
87.5535	0		83.8578	0		80.3962	2230.05
87.5539	0		83.8582	0		80.3966	0
87.5544	0		83.8586	0		80.397	0
87.6992	0		83.859	0		80.3974	0
87.6997	0		83.8615	0		80.3978	0
87.7001	0		83.8619	0		80.4404	0
87.7006	0		83.8623	0		80.4408	0
87.701	2134.21		83.8627	0		80.4411	0
87.7015	4423.63		83.8631	1504.74		80.4415	0
87.7019	5741.17		83.8636	4499.15		80.4419	3416.38
87.7023	5286.65		83.864	7074.31		80.4423	4091.1
87.7028	3519.23		83.8644	6957.28		80.4427	4717.61
87.7032	0		83.8648	4388.67		80.4431	5334.11
87.7037	0		83.8652	1862.58		80.4435	5004.93
87.7041	0		83.8656	0		80.4439	3343.78
87.7045	0		83.866	0		80.4442	0
87.7226	0		83.8664	0		80.4446	0
87.7231	0		83.8668	0		80.445	3725.49
87.7235	0		83.8813	0		80.4454	5930.02
87.7239	0		83.8817	0		80.4458	6508.25
87.7244	1881.59		83.8821	0		80.4462	5091.25
87.7248	4074.3		83.8825	0		80.4466	2730.76
87.7253	5292.03		83.8829	1738.89		80.447	0
87.7257	4603.07		83.8833	4114.26		80.4473	0
87.7261	2597.97		83.8838	6696.11		80.4477	0
87.7266	0		83.8842	8361.13		80.4481	0
87.727	0		83.8846	8260.38		80.5229	0
87.7274	0		83.885	6450.45		80.5233	0
87.7279	0		83.8854	3911.52		80.5237	0
91.5634	0		83.8858	1935.75		80.5241	0
91.5639	0		83.8862	0		80.5245	2030.69
91.5644	0		83.8866	0		80.5249	4426.25
91.5648	0		83.8871	0		80.5253	6074.94
91.5653	2010.49		83.8875	0		80.5256	5467.64
91.5658	3800.44		83.9601	0		80.526	3027.68
91.5662	4748.36		83.9605	0		80.5264	0
91.5667	4308.01		83.9609	0		80.5268	0
91.5672	2768.74		83.9613	0		80.5272	0
91.5677	0		83.9618	3511.99		80.5276	0
91.5681	0		83.9622	5485.12		80.5419	0
91.5686	0		83.9626	5830.09		80.5423	0
91.5691	0		83.963	4298.69		80.5427	0
91.5926	0		83.9634	2100.86		80.5431	0
91.5931	0		83.9638	0		80.5435	2303.29
91.5935	0		83.9642	0		80.5439	5100.76
91.594	0		83.9647	0		80.5443	6792.03
91.5945	2167.12		83.9651	0		80.5447	6027.75
91.5949	4454.39		83.989	0		80.545	3629.45
91.5954	5631.02		83.9894	0		80.5454	0
91.5959	4899.8		83.9899	0		80.5458	0
91.5964	2852.53		83.9903	0		80.5462	0
91.5968	0		83.9907	3579.4		80.5466	0
91.5973	0		83.9911	5968.57		81.7569	0
91.5977	0		83.9915	6614.73		81.7573	0
91.5982	0		83.9919	5131.61		81.7577	0
94.3591	0		83.9923	2691.88		81.7581	0
94.3596	0		83.9927	0		81.7585	2193.11
94.3601	0		83.9931	0		81.7589	4060.67
94.3606	0		83.9935	0		81.7593	4977.59
94.361	2627.73		83.994	0		81.7597	4169.83
94.3615	4299.71		86.3397	0		81.7601	2209.11
94.362	4856.27		86.3401	0		81.7604	0
94.3625	3877.83		86.3405	0		81.7608	0
94.363	2028.54		86.341	0		81.7612	0
94.3635	0		86.3414	3383.52		81.7616	0
94.364	0		86.3418	5400.89		83.058	0
94.3645	0		86.3423	6319.51		83.0584	0
94.365	0		86.3427	5265.53		83.0588	0
96.1988	0		86.3431	2948.8		83.0592	0
96.1993	0		86.3435	0		83.0596	1937.74
96.1998	0		86.344	2230.95		83.06	5904.03
96.2003	0		86.3444	4607.06		83.0604	15486.7
96.2008	2460.67		86.3448	6254.86		83.0609	22786.3
96.2013	4977.51		86.3453	5600.85		83.0613	20389.9
96.2018	7511.31		86.3457	3229.12		83.0617	12254.1
96.2023	8490.98		86.3461	0		83.0621	4167.57
96.2028	6981.8		86.3465	0		83.0625	1260.41
96.2033	4000.19		86.347	0		83.0629	0
96.2039	1909.37		86.3474	0		83.0633	0
96.2043	0		87.4428	0		83.0637	0
96.2048	0		87.4432	0		83.0641	0
96.2053	0		87.4437	0		83.7322	0
96.2058	0		87.4441	0		83.7326	0
99.9687	0		87.4445	1970.38		83.733	0
99.9693	0		87.445	3741.57		83.7334	0
99.9698	0		87.4454	4579.61		83.7338	2558.36
99.9703	0		87.4458	3770.34		83.7342	4322.67
99.9709	1383.97		87.4463	2010.22		83.7346	5218.51
99.9714	3824.07		87.4467	0		83.7351	4797.41
99.972	5966.44		87.4472	0		83.7355	3520.86
99.9725	6094.58		87.4476	0		83.7359	0
99.973	4123.17		87.448	0		83.7363	0
99.9736	1731.29		87.4568	0		83.7367	0
99.974	0		87.4573	0		83.7371	0
99.9746	0		87.4577	0		83.7375	0
99.9751	0		87.4581	0		83.7379	3014.11
99.9756	0		87.4586	2015.15		83.7383	4272.33
107.85	0		87.459	4446.95		83.7388	4844.15
107.851	0		87.4595	6504.65		83.7392	4567.61
107.851	0		87.4599	6889.83		83.7396	3485.37
107.852	0		87.4603	5326.53		83.74	0
107.853	2351.5		87.4608	2886.99		83.7404	0
107.853	5045.96		87.4612	0		83.7408	0
107.854	8013.28		87.4617	0		83.7412	0
107.854	9190.61		87.4621	0		83.7894	0
107.855	7442.29		87.4625	0		83.7898	0
107.856	3908.92		87.4656	0		83.7902	0
107.856	1063.02		87.466	0		83.7906	0
107.857	0		87.4665	0		83.791	2985.65
107.857	0		87.4669	0		83.7914	5299.97
107.858	0		87.4674	1641.89		83.7918	6544.9
107.859	0		87.4678	4142.69		83.7923	5769.3
109.836	0		87.4682	5838.01		83.7927	3410.24
109.837	0		87.4687	5298.06		83.7931	0
109.837	0		87.4691	3048.93		83.7935	0
109.838	0		87.4695	0		83.7939	0
109.839	2066.74		87.47	1826.7		83.7943	0
109.839	3733.33		87.4704	4351.65		83.864	0
109.84	4724.38		87.4709	6675.67		83.8644	0
109.84	4428.21		87.4713	6871.45		83.8648	0
109.841	3106.23		87.4718	4930.36		83.8652	0
109.842	0		87.4722	2397.27		83.8656	2421.65
109.842	0		87.4726	0		83.866	4972.47
109.843	0		87.4731	0		83.8664	6536.23
109.843	0		87.4735	0		83.8668	5714.67
112.698	0		87.4739	0		83.8673	3106.17
112.699	0		87.6045	0		83.8677	0
112.7	0		87.605	0		83.8681	0
112.7	0		87.6054	0		83.8685	0
112.701	2615.82		87.6059	0		83.8689	0
112.701	4237.47		87.6063	3191.18		83.8825	0
112.702	4722.54		87.6067	4912.65		83.8829	0
112.703	3779.73		87.6072	5351.84		83.8833	0
112.703	2080.79		87.6076	4287.79		83.8837	0
112.704	0		87.6081	2443.3		83.8842	3094.67
112.705	0		87.6085	0		83.8846	5395.46
112.705	0		87.6089	0		83.885	6193.22
112.706	0		87.6094	0		83.8854	5119.27
118.081	0		87.6098	0		83.8858	3257.47
118.082	0		87.7968	0		83.8862	0
118.082	0		87.7972	0		83.8866	0
118.083	0		87.7977	0		83.887	0
118.084	1590.74		87.7981	0		83.8875	0
118.084	3918.43		87.7985	2711.4		83.9795	0
118.085	10781.4		87.799	3821.71		83.9799	0
118.086	19124.2		87.7994	4329.87		83.9803	0
118.086	25365.8		87.7999	3865.96		83.9808	0
118.087	20469.8		87.8003	2502.4		83.9812	1484.79
118.088	11927.2		87.8007	0		83.9816	4138.22
118.089	4601.29		87.8012	0		83.982	5667.26
118.089	1761.35		87.8016	0		83.9824	4881.59
118.09	0		87.802	0		83.9828	2700.11
118.091	0		91.2828	0		83.9832	0
118.091	0		91.2833	0		83.9836	0
118.092	0		91.2837	0		83.9841	0
120.86	0		91.2842	0		83.9845	0
120.861	0		91.2847	2842.36		84.0138	0
120.862	0		91.2851	4765.75		84.0142	0
120.862	0		91.2856	5529.02		84.0146	0
120.863	3074.48		91.2861	4520.07		84.0151	0
120.864	4884.21		91.2865	2415.59		84.0155	2952.32
120.865	5210.54		91.287	0		84.0159	4798.49
120.865	3734.9		91.2875	0		84.0163	5420.3
120.866	1545.39		91.2879	0		84.0167	4230.87
120.867	0		91.2884	0		84.0171	2000.33
120.867	0		91.31	0		84.0175	0
120.868	0		91.3104	0		84.0179	0
120.869	0		91.3109	0		84.0183	0
121.749	0		91.3114	0		84.0188	0
121.75	0		91.3118	2922.78		86.3388	0
121.75	0		91.3123	5659.9		86.3392	0
121.751	0		91.3128	7287.51		86.3397	0
121.752	2126.87		91.3132	6477.77		86.3401	0
121.752	4320.97		91.3137	3841.32		86.3405	3057.13
121.753	6143.27		91.3142	1639.34		86.341	4530.46
121.754	6735.78		91.3146	1761.77		86.3414	5399.66
121.755	5717.6		91.3151	3909.73		86.3418	5057.78
121.755	3624		91.3156	5863.94		86.3423	3550.32
121.756	0		91.3161	5635.82		86.3427	0
121.757	0		91.3165	3319.78		86.3431	0
121.757	0		91.317	0		86.3435	1915.53
121.758	0		91.3174	0		86.344	4116.02
128.366	0		91.3179	0		86.3444	6155.76
128.367	0		91.3184	0		86.3448	6507.7
128.368	0		91.332	0		86.3453	4830.8
128.369	0		91.3324	0		86.3457	2302.36
128.369	2253.04		91.3329	0		86.3461	0
128.37	3996.42		91.3334	0		86.3466	0
128.371	4983.99		91.3338	2292.61		86.347	0
128.372	4532.92		91.3343	3952.59		86.3474	0
128.373	2916.51		91.3348	4764.04		86.9323	0
128.373	0		91.3353	3942.77		86.9327	0
128.374	0		91.3357	2156.14		86.9332	0
128.375	0		91.3362	0		86.9336	0
128.376	0		91.3367	0		86.934	3638.76
131.742	0		91.3371	0		86.9345	5487.17
131.743	0		91.3376	0		86.9349	5842.13
131.743	0		91.4211	0		86.9353	4309.2
131.744	0		91.4215	0		86.9358	1903.21
131.745	2364.37		91.422	0		86.9362	0
131.746	3640.82		91.4225	0		86.9366	0
131.747	4141.85		91.423	2178.45		86.9371	0
131.748	3631.04		91.4234	4188.78		86.9375	0
131.748	2399.56		91.4239	5790.36		87.4823	0
131.749	0		91.4244	6048.08		87.4827	0
131.75	0		91.4248	4699.59		87.4832	0
131.751	0		91.4253	2512.79		87.4836	0
131.752	0		91.4257	0		87.484	1726.37
133.726	0		91.4262	0		87.4845	4407.37
133.727	0		91.4267	0		87.4849	6103
133.728	0		91.4271	0		87.4854	5423.37
133.728	0		94.6199	0		87.4858	3021.9
133.729	2306.56		94.6204	0		87.4862	0
133.73	3960.62		94.6209	0		87.4867	0
133.731	4466.14		94.6214	0		87.4871	0
133.732	3437.86		94.6219	2200.59		87.4876	0
133.733	1636.17		94.6224	3925.67		87.4889	0
133.733	0		94.6229	4693.8		87.4893	0
133.734	0		94.6234	3957.61		87.4898	0
133.735	0		94.6239	2254		87.4902	0
133.736	0		94.6244	0		87.4906	2992.77
134.009	0		94.6248	0		87.4911	5956.2
134.01	0		94.6253	0		87.4915	7330.32
134.01	0		94.6258	0		87.492	5999.8
134.011	0		95.4	0		87.4924	3255.29
134.012	1576.5		95.4005	0		87.4928	0
134.013	3522.52		95.4009	0		87.4933	0
134.014	5042.25		95.4014	0		87.4937	0
134.015	5091.17		95.4019	2808.18		87.4941	0
134.015	3756.21		95.4025	4882.72		87.6287	0
134.016	1968.2		95.403	5776.19		87.6292	0
134.017	0		95.4035	4818.37		87.6296	0
134.018	0		95.4039	2736.53		87.6301	0
134.019	0		95.4044	0		87.6305	2206.72
134.02	0		95.4049	0		87.6309	4061.98
134.63	0		95.4055	0		87.6314	5003.61
134.63	0		95.406	0		87.6318	4346.41
134.631	0		95.4971	0		87.6323	2451.13
134.632	0		95.4976	0		87.6327	0
134.633	1812.94		95.4981	0		87.6331	0
134.634	3648.29		95.4986	0		87.6336	0
134.635	4658.04		95.4991	1874.34		87.634	0
134.635	4219.31		95.4996	3593.99		91.079	0
134.636	2731.2		95.5001	4525.52		91.0795	0
134.637	0		95.5006	4043.65		91.0799	0
134.638	0		95.5011	2464.23		91.0804	0
134.639	0		95.5016	0		91.0809	2472.29
134.64	0		95.5021	0		91.0813	4577.67
138.525	0		95.5026	0		91.0818	5441.19
138.526	0		95.5031	0		91.0823	4247.42
138.527	0		96.2013	0		91.0827	1930.65
138.528	0		96.2018	0		91.0832	0
138.529	1492.57		96.2023	0		91.0837	0
138.53	3914.43		96.2028	0		91.0841	0
138.531	5994.02		96.2034	2657.3		91.0846	0
138.531	6362.37		96.2039	5557.86		91.1346	0
138.532	4799.95		96.2044	8510.48		91.135	0
138.533	2547.21		96.2049	9122.83		91.1355	0
138.534	0		96.2054	6861.02		91.136	0
138.535	0		96.2059	3406.77		91.1364	2587.83
138.536	0		96.2064	0		91.1369	4411.59
138.537	0		96.2069	0		91.1374	5553.8
141.41	0		96.2074	0		91.1378	5162.27
141.411	0		96.2079	0		91.1383	3323.96
141.412	0		99.6743	0		91.1388	0
141.412	0		99.6748	0		91.1392	0
			99.6753	0		91.1397	0
			99.6759	0		91.1402	0
			99.6764	3031.25		91.2173	0
			99.6769	5205.94		91.2177	0
			99.6775	6105.64		91.2182	0
			99.678	5113.95		91.2187	0
			99.6785	2976.78		91.2192	2725.75
			99.6791	0		91.2196	4368.43
			99.6796	0		91.2201	5141.19
			99.6801	0		91.2206	4393.83
			99.6807	0		91.221	2493.45
			99.7101	0		91.2215	0
			99.7106	0		91.222	0
			99.7111	0		91.2224	0
			99.7117	0		91.2229	0
			99.7122	2377.99		91.4014	0
			99.7127	4503.61		91.4018	0
			99.7133	5664.06		91.4023	0
			99.7138	4934.68		91.4028	0
			99.7143	2870.65		91.4032	3127.66
			99.7149	0		91.4037	4870.79
			99.7154	0		91.4042	5509.93
			99.7159	0		91.4046	4684.27
			99.7165	0		91.4051	2984.67
			100.021	0		91.4056	0
			100.022	0		91.406	0
			100.022	0		91.4065	0
			100.023	0		91.407	0
			100.023	1986.25		93.2457	0
			100.024	3513.19		93.2461	0
			100.025	4249.38		93.2466	0
			100.025	3742.66		93.2471	0
			100.026	2347.15		93.2476	3241.5
			100.026	0		93.2481	5002.41
			100.027	0		93.2486	5492.79
			100.027	0		93.249	4463.78
			100.028	0		93.2495	2581.72
			107.851	0		93.25	0
			107.852	0		93.2505	0
			107.853	0		93.251	0
			107.853	0		93.2514	0
			107.854	2988.96		95.0463	0
			107.854	5366.28		95.0468	0
			107.855	6856.89		95.0473	0
			107.856	6085.79		95.0478	0
			107.856	3549.91		95.0483	2947.08
			107.857	0		95.0488	4600.17
			107.857	0		95.0493	5202.41
			107.858	0		95.0498	4335.66
			107.859	0		95.0503	2584.78
			109.849	0		95.0507	0
			109.849	0		95.0512	0
			109.85	0		95.0517	0
			109.85	0		95.0522	0
			109.851	2553.36		96.1988	0
			109.852	4603.19		96.1993	0
			109.852	5221.31		96.1998	0
			109.853	3914.98		96.2003	0
			109.853	1742.1		96.2008	3469.28
			109.854	0		96.2013	5733
			109.855	0		96.2018	7563.26
			109.855	0		96.2023	8004.44
			109.856	0		96.2028	6756.58
			121.752	0		96.2033	4366.2
			121.753	0		96.2038	1961.68
			121.754	0		96.2043	0
			121.755	0		96.2048	0
			121.755	1804.83		96.2053	0
			121.756	4376.7		96.2059	0
			121.757	6949.9		98.5156	0
			121.757	7707.55		98.5161	0
			121.758	5978.9		98.5166	0
			121.759	3025.14		98.5172	0
			121.76	0		98.5177	2218.53
			121.76	0		98.5182	4299.05
			121.761	0		98.5187	5175.7
			121.762	0		98.5193	4334.31
			123.05	0		98.5198	2553.87
			123.051	0		98.5203	0
			123.052	0		98.5208	0
			123.052	0		98.5214	0
			123.053	2262.19		98.5219	0
			123.054	5482.36		99.9044	0
			123.055	9494.69		99.9049	0
			123.055	17625.6		99.9054	0
			123.056	10831.8		99.906	0
			123.057	7080.25		99.9065	3769.65
			123.058	3096.41		99.907	6313.7
			123.058	0		99.9076	7794.53
			123.059	0		99.9081	7160.83
			123.06	0		99.9087	4669.33
			123.06	0		99.9092	1949.14
			123.095	0		99.9097	0
			123.096	0		99.9102	0
			123.096	0		99.9108	0
			123.097	0		99.9113	0
			123.098	3372.75		104.393	0
			123.099	8716.36		104.393	0
			123.099	16799.7		104.394	0
			123.1	22829.4		104.395	0
			123.101	18588		104.395	1769.21
			123.101	6188.57		104.396	3967.2
			123.102	1754.96		104.396	5274.79
			123.103	0		104.397	4506.94
			123.103	0		104.397	2248.49
			123.104	0		104.398	0
			123.105	0		104.399	0
			133.986	0		104.399	0
			133.987	0		104.4	0
			133.988	0		104.499	0
			133.989	0		104.5	0
			133.99	2226.85		104.501	0
			133.99	3796.21		104.501	0
			133.991	4603.06		104.502	1869.74
			133.992	4090.92		104.502	4034.26
			133.993	2524.77		104.503	5174.23
			133.994	0		104.503	4335.23
			133.994	0		104.504	2334.1
			133.995	0		104.505	0
			133.996	0		104.505	0
			146.46	0		104.506	0
			146.461	0		104.506	0
			146.462	0		107.85	0
			146.463	0		107.851	0
						107.851	0
						107.852	0
						107.853	2006.08
						107.853	4520.3
						107.854	7892.9
						107.854	10497.9
						107.855	10643.7
						107.856	8055.77
						107.856	4392.04
						107.857	2081.99
						107.857	0
						107.858	0
						107.859	0
						107.859	0
						109.567	0
						109.568	0
						109.568	0
						109.569	0
						109.57	3039.93
						109.57	4823.15
						109.571	5728.51
						109.571	5067.23
						109.572	3119.92
						109.573	0
						109.573	0
						109.574	0
						109.574	0
						120.539	0
						120.54	0
						120.541	0
						120.541	0
						120.542	2184.14
						120.543	3946.02
						120.543	4775.48
						120.544	4017.93
						120.545	2163.54
						120.546	0
						120.546	0
						120.547	0
						120.548	0
						124.034	0
						124.035	0
						124.036	0
						124.036	0
						124.037	2984.66
						124.038	7310.14
						124.039	14757.3
						124.039	19453.7
						124.04	10634
						124.041	5703.33
						124.042	1787.02
						124.042	0
						124.043	0
						124.044	0
						124.045	0
						124.08	0
						124.081	0
						124.082	0
						124.082	0
						124.083	2946.54
						124.084	4914.72
						124.085	18674.9
						124.085	61340.4
						124.086	110184
						124.087	151132
						124.088	126293
						124.088	75938.5
						124.089	29714.2
						124.09	7805.58
						124.091	1379.22
						124.091	0
						124.092	0
						124.093	0
						124.094	0
						124.094	0
						124.095	0
						124.096	0
						124.096	0
						124.097	3375.25
						124.098	16369
						124.099	45293.4
						124.099	76312.2
						124.1	94187
						124.101	70362.3
						124.102	39836.7
						124.102	12638.2
						124.103	3587.62
						124.104	0
						124.105	0
						124.105	0
						124.106	0
						146.46	0
						146.461	0
						146.462	0
						146.463	0
