# Supplementary material for: Resurrecting essential amino acid biosynthesis in mammalian cells
Source: eLife journal article supplement (doi:10.7554/elife.72847), 2022-09-27
Supplement: supp [file Figure 4-figure supplement 1-source data 1.xlsx]

## Sheet: B
RPMI feedback inhibition test, plated 200k pMTIV cells in 6 well plates on Feb 9 2022
Counted 3 wells and then switched triplicate populations over to valine-free medium RPMI, valine-free RPMI (0.06mM Ile), valine-free RPMI (0.2mM Leu), valine-free RPMI (0.06mM Ile, 0.2mM Leu), and Complete RPMI on Feb 10 2022.
	Count	Actual
Replicate 1	171100	513300
Replicate 2	182200	546600
Replicate 3	152100	456300
On day two, switched media for all VfM populations, and counted complete populations
	Media	Count	Actual
Replicate 1	Complete RPMI	465900	1863600
Replicate 2	Complete RPMI	231400	2314000
Replicate 3	Complete RPMI	490100	1960400
On day four, looked like there was a difference between populations with VfM (I) and VfM (IL) looking a lot healthier than their VfM and VfM (L) counterparts. Counted all wells.
	Media	Count	Actual
Replicate 1	Valine-free RPMI	283400	283400
Replicate 2	Valine-free RPMI	272400	272400
Replicate 3	Valine-free RPMI	238500	238500
Replicate 1	Valine-free RPMI (0.06mM Ile)	175700	702800
Replicate 2	Valine-free RPMI (0.06mM Ile)	194300	777200
Replicate 3	Valine-free RPMI (0.06mM Ile)	218500	874000
Replicate 1	Valine-free RPMI (0.2mM Leu)	226600	226600
Replicate 2	Valine-free RPMI (0.2mM Leu)	218300	218300
Replicate 3	Valine-free RPMI (0.2mM Leu)	217800	217800
Replicate 1	Valine-free RPMI (0.06mM Ile, 0.2mM Leu)	166600	666400
Replicate 2	Valine-free RPMI (0.06mM Ile, 0.2mM Leu)	188500	754000
Replicate 3	Valine-free RPMI (0.06mM Ile, 0.2mM Leu)	211700	846800

## Sheet: C
Plated 1million pMTIV cells and pMTIV-ilvD+ cells in 4x60mm dishes in complete RPMI medium on 3/21/22
On 3/22/22, switched 3x wells to RPMI valine-free medium (0.06mM Ile) with 13C glucose + 2 mM 12C sodium pyruvate. Counted the last well.
	Count	Total
pMTIV well 0	101400	2028000
pMTIV-ilvD+ well 0	89080	1781600
On day 2, collected samples for 13C metabolomics (150ul) and cell counts (50ul in 500 total) and replated the rest (~800ul). Replated cells were plated on plates coated with 0.1% gelatin for 30 mins (1x PBS wash after coating)
	Count	Total	Replated (cells)	Dish
pMTIV well 1	339000	3390000	2712000	60mm
pMTIV well 2	357600	3576000	2860800	60mm
pMTIV well 3	403200	4032000	3225600	60mm
pMTIV-ilvD+ well 1	441600	4.416e+06	3.5328e+06	60mm
pMTIV-ilvD+ well 2	421400	4.214e+06	3.3712e+06	60mm
pMTIV-ilvD+ well 3	443500	4.435e+06	3.548e+06	60mm
On day 4, collected samples for 13C metabolomics (150ul) and cell counts (50ul in 1200 total for pMTIV and 1000 total for pMTIV-ilvD+) and replated ~3 mil. Replated cells were plated on plates coated with 0.1% gelatin for 30 mins (1x PBS wash after coating)
	Count	Total	Replated (cells)	Dish
pMTIV well 1	169800	4075200	2.99283e+06	60mm
pMTIV well 2	193100	4634400	2.98826e+06	60mm
pMTIV well 3	213100	5.1144e+06	3.00727e+06	60mm
pMTIV-ilvD+ well 1	215600	4312000	2.9977e+06	60mm
pMTIV-ilvD+ well 2	229900	4598000	2.99054e+06	60mm
pMTIV-ilvD+ well 3	240100	4.802e+06	3.00029e+06	60mm
On day 6, collected samples for 13C metabolomics (150ul) and cell counts (50ul in 1000 total for pMTIV and 1000 total for pMTIV-ilvD+) and replated ~3 mil. Replated cells were plated on plates coated with 0.1% gelatin for 30 mins (1x PBS wash after coating)
	Count	Total	Replated (cells)	Dish
pMTIV well 1	195200	3904000	2998272	60mm
pMTIV well 2	181000	3620000	2896000	60mm
pMTIV well 3	183700	3674000	2939200	60mm
pMTIV-ilvD+ well 1	240000	4800000	3002880	60mm
pMTIV-ilvD+ well 2	213800	4276000	3.00346e+06	60mm
pMTIV-ilvD+ well 3	212400	4248000	3.01098e+06	60mm
On day 8, collected samples for 13C metabolomics (150ul) and cell counts (50ul in 1000 total for pMTIV and 25 in 500ul total for pMTIV-ilvD+) and replated ~1.2 mil to 6well plate. Replated cells were plated on plates coated with 0.1% gelatin for 30 mins (1x PBS wash after coating)
	Count	Total	Replated (cells)	Dish
pMTIV well 1	115900	2318000	1196088	6well
pMTIV well 2	129500	2590000	1197616	6well
pMTIV well 3	120800	2416000	1.20027e+06	6well
pMTIV-ilvD+ well 1	114000	2.28e+06	1.16189e+06	6well
pMTIV-ilvD+ well 2	147500	2950000	1163480	6well
pMTIV-ilvD+ well 3	176000	3520000	1154560	6well
On day 10 switched media on pMTIV cells and counted pMTIV-LV cells (collected 200ul for metabolomics, counted with 25ul in 500ul total and replated the rest)
	Count	Total	Replated (cells)	Dish
-
-
-
pMTIV-ilvD+ well 1	71840	1436800	1113520	6well
pMTIV-ilvD+ well 2	87660	1753200	1358730	6well
pMTIV-ilvD+ well 3	55540	1110800	860870	6well
On day 12 collected samples for 13C metabolomcs (200ul) and cell counts (25ul in 500ul total for pMTIV and 20ul in 500ul total for pMTIV-LV) and replated ~1mil to 6 well plates. Replated cells were plated on plates coated with 0.1% gelatin.
	Count	Total	Replated (cells)	Dish
pMTIV well 1	68050	1361000	1.00415e+06	6well
pMTIV well 2	65120	1.3024e+06	1.00936e+06	6well
pMTIV well 3	87600	1752000	997983	6well
pMTIV-ilvD+ well 1	64580	1614500	1.00745e+06	6well
pMTIV-ilvD+ well 2	92390	2.30975e+06	1.00169e+06	6well
pMTIV-ilvD+ well 3	56490	1412250	1101555	6well
On day 14 collected samples for 13C metabolomcs (200ul) and cell counts (20ul in 500ul total for pMTIV and 20ul in 500ul total for pMTIV-LV) and replated ~1mil to 6 well plates. Replated cells were plated on plates coated with 0.1% gelatin.
	Count	Total	Replated (cells)	Dish
pMTIV well 1	60480	1512000	1.00835e+06	6well
pMTIV well 2	55230	1380750	1.00698e+06	6well
pMTIV well 3	67310	1682750	1.00935e+06	6well
pMTIV-ilvD+ well 1	57560	1439000	1.00232e+06	6well
pMTIV-ilvD+ well 2	57700	1.4425e+06	1.00476e+06	6well
pMTIV-ilvD+ well 3	62420	1560500	1.0054e+06	6well
On day 16 switched media on pMTIV cells and passaged pMTIV-LV cells (200ul for metabolomics, 20ul in 500 for counts) and replated ~1mil to 6 well plates. Replated cells were plated on plates coated with 0.1% gelatin.
	Count	Total	Replated (cells)
-
-
-
pMTIV-ilvD+ well 1	76260	1906500	1.00526e+06	6well
pMTIV-ilvD+ well 2	51050	1.27625e+06	995475	6well
pMTIV-ilvD+ well 3	62070	1551750	1.00944e+06	6well
On day 18, passaged all wells (200ul for metaobolomics, 20ul in 500 for counts) and replated ~1mil (or as many cells as possible) to 6 well plates. Replated cells were plated on plates coated with 0.1% gelatin.
	Count	Total	Replated (cells)
pMTIV well 1	90550	2263750	1.00999e+06	6well
pMTIV well 2	62580	1564500	1.00798e+06	6well
pMTIV well 3	82510	2062750	1.00559e+06	6well
pMTIV-ilvD+ well 1	46130	1.15325e+06	899535	6well
pMTIV-ilvD+ well 2	70080	1752000	1.00579e+06	6well
pMTIV-ilvD+ well 3	58480	1462000	1.01036e+06	6well
On day 20, passaged all wells (200ul for metabolomics, 20ul in 500 for counts) and replated ~1mil or as many as possible to 6 wells plates.. Replated cells were plated on plates coated with 0.1% gelatin.
	Count	Total	Replated (cells)
pMTIV well 1	50310	1257750	981045	6well
pMTIV well 2	50960	1274000	993720	6well
pMTIV well 3	52210	1305250	1018095	6well
pMTIV-ilvD+ well 1	56900	1.4225e+06	1.00081e+06	6well
pMTIV-ilvD+ well 2	56570	1414250	1.00383e+06	6well
pMTIV-ilvD+ well 3	57230	1430750	997691	6well
On day 22, passaged LV wells (200ul for metabolomics 20ul in 500 for counts) and replated ~1mil or a many as possible to 6 well plates. Replated cells were plated on plates coated with 0.1% gelatin. pMTIV cells had a media change.
	Count	Total	Replated (cells)
-				6well
-				6well
-				6well
pMTIV-ilvD+ well 1	54840	1371000	1.00094e+06	6well
pMTIV-ilvD+ well 2	66110	1652750	1.00295e+06	6well
pMTIV-ilvD+ well 3	63350	1583750	995672	6well
On day 24, passaged allwells (200ul for metabolomics, 20ul in 500 for counts) and replated ~1mil or as many as possile to 6 well plates. Replate wells were plated on plates coated with 0.1% gelain.
	Count	Total	Replated (cells)
pMTIV well 1	77540	1938500	1.00096e+06	6well
pMTIV well 2	42150	1053750	821925	6well
pMTIV well 3	50980	1274500	994110	6well
pMTIV-ilvD+ well 1	44860	1121500	874770	6well
pMTIV-ilvD+ well 2	60580	1514500	1.00057e+06	6well
pMTIV-ilvD+ well 3	73390	1834750	1.00034e+06	6well
On day 26 passaged all LV wells (collecting metaoblomics samples only for wells 1 and 2 as 3 had a questionable number of cells available) and replated ~1mil to 6 well plates. Replated wells were plated on paltes coated with 0.1% gelatin
	Count	Total	Replated (cells)
-				6well
-				6well
-				6well
pMTIV-ilvD+ well 1	74180	1854500	998092	6well
pMTIV-ilvD+ well 2	55270	1381750	998010	6well
pMTIV-ilvD+ well 3	43270	1081750	999688	6well
On day 28 passaged all LV wells and replated ~1mil to 6 well plates. Replated wells were plated on paltes coated with 0.1% gelatin
Also replated pMTIV well 2 as cell number seemed to be decreasing -- replated on 24well instead. Counted 50ul in 500ul total and replated the remainder (resuspended in 820ul to match cell #/media volume of 6 well plates) in two 24well wells as indicated. Wells 1 and 3 simply had their media changed.
	Count	Total	Replated (well 1, cell number)
pMTIV well 2	32740	327400	189652	24 well
	Count	Total	Replated (cells)
pMTIV-ilvD+ well 1	49160	1.229e+06	958620
pMTIV-ilvD+ well 2	61780	1544500	1.00473e+06
pMTIV-ilvD+ well 3	60750	1518750	1004562
On day 30 passaged all LV wells and replated ~1mil to 6 well plates. Replated wells were plated on paltes coated with 0.1% gelatin
	Count	Total	Replated (cells)
pMTIV-ilvD+ well 1	47560	1189000	927420
pMTIV-ilvD+ well 2	46560	1164000	907920
pMTIV-ilvD+ well 3	53670	1341750	996330
On day 32 passaged all LV wells and tried to replate pMTIV cells on smaller surfaces (24well). Collected 300ul pMTIV for metabolomics and 150ul pMTIV-LV. Used 20ul of each for cell counts.
	Count	Total	Replated (cells)
pMTIV well 1	22640	566000	384880	24 well
pMTIV well 2	-
pMTIV well 3	16500	412500	280500	24 well
pMTIV-ilvD+ well 1	46330	1158250	949765	6well
pMTIV-ilvD+ well 2	46330	1158250	949765	6well
pMTIV-ilvD+ well 3	49860	1246500	1.00169e+06	6well
On day 34 passaged all LV wells. Collected 200ul LV cells for metabolomics and used 20ul for cell counts. Switched media on pMTIV wells.
	Count	Total	Replated (cells)
pMTIV-ilvD+ well 1	46210	1.15525e+06	901095
pMTIV-ilvD+ well 2	65410	1.63525e+06	997437
pMTIV-ilvD+ well 3	56320	1408000	999398
On day 36, collected all samples for metabolomics. A proportion of LV cells were also frozen down in H-RPMI VfM / 2x freezing medium. pMTIV cell counts were 50 in 500ul total and had 500ul total trypsinized solution. LV cell counts were 20 ul in 500ul total and had 1000ul total trypsinzed solution
	Count	Total	Replated (cells)
pMTIV well 1	32060	160300	-
pMTIV well 2	11170	55850	-
pMTIV well 3	32170	160850	-
pMTIV-ilvD+ well 1	42530	1063250	-
pMTIV-ilvD+ well 2	41190	1029750	-
pMTIV-ilvD+ well 3	42410	1060250	-

## Sheet: D
	Peak Intensities in Samples																																Percent Fully Labeled
Metabolite	pMTIV_Day2_Rep1	pMTIV_Day2_Rep2	pMTIV_Day4_Rep1	pMTIV_Day4_Rep2	pMTIV_Day12_Rep1	pMTIV_Day12_Rep2	pMTIV_Day14_Rep1	pMTIV_Day14_Rep2	pMTIV_Day18_Rep1	pMTIV_Day18_Rep2	pMTIV_Day24_Rep1	pMTIV_Day24_Rep2	pMTIV-ilvD+_Day2_Rep1	pMTIV-ilvD+_Day2_Rep2	pMTIV-ilvD+_Day4_Rep1	pMTIV-ilvD+_Day4_Rep2	pMTIV-ilvD+_Day8_Rep1	pMTIV-ilvD+_Day8_Rep2	pMTIV-ilvD+_Day12_Rep1	pMTIV-ilvD+_Day12_Rep2	pMTIV-ilvD+_Day16_Rep1	pMTIV-ilvD+_Day16_Rep2	pMTIV-ilvD+_Day20_Rep1	pMTIV-ilvD+_Day20_Rep2	pMTIV-ilvD+_Day24_Rep1	pMTIV-ilvD+_Day24_Rep2	pMTIV-ilvD+_Day28_Rep1	pMTIV-ilvD+_Day28_Rep2	pMTIV-ilvD+_Day32_Rep1	pMTIV-ilvD+_Day32_Rep2	pMTIV-ilvD+_Day36_Rep1	pMTIV-ilvD+_Day36_Rep2	pMTIV_Day2_Rep1	pMTIV_Day2_Rep2	pMTIV_Day4_Rep1	pMTIV_Day4_Rep2	pMTIV_Day12_Rep1	pMTIV_Day12_Rep2	pMTIV_Day14_Rep1	pMTIV_Day14_Rep2	pMTIV_Day18_Rep1	pMTIV_Day18_Rep2	pMTIV_Day24_Rep1	pMTIV_Day24_Rep2	pMTIV-ilvD+_Day2_Rep1	pMTIV-ilvD+_Day2_Rep2	pMTIV-ilvD+_Day4_Rep1	pMTIV-ilvD+_Day4_Rep2	pMTIV-ilvD+_Day8_Rep1
25 (R)-2,3-Dihydroxy-3-methylbutanoic acid-13C-0	-	-	-	-	-	-	-	-	-	-	-	-	-	-	-	-	-	-	-	-	-	-	-	-	-	-	-	-	-	-	-	-	0	0	0	0	0	0	0	0	0	0	0	0	-	-	-	-	0
26 (R)-2,3-Dihydroxy-3-methylbutanoic acid-13C-1	54240	51599	43287	-	-	-	-	-	-	-	-	-	-	-	-	-	-	-	-	-	-	-	-	-	-	-	-	-	-	-	-	-	0.00290224	0.00287604	0.00443627	0	0	0	0	0	0	0	0	0	-	-	-	-	0
27 (R)-2,3-Dihydroxy-3-methylbutanoic acid-13C-2	3313781	3172239	1964912	1190746	1553031	1293060	122795	179333	660530	265800	58734	64091	-	-	-	-	-	143644	-	-	-	-	76541	-	-	-	57385	-	-	-	-	-	0.177312	0.176815	0.201374	0.201505	0.160909	0.138113	0.0954262	0.148834	0.121964	0.143384	0.0617588	0.193289	-	-	-	-	0
28 (R)-2,3-Dihydroxy-3-methylbutanoic acid-13C-3	3423822	3279383	2054582	1132744	1668628	1389284	100829	121608	657426	222172	60091	54661	-	-	-	-	37748	76466	-	-	-	-	29526	27664	17505	26272	42513	11776	16709	-	-	15514	0.1832	0.182787	0.210564	0.19169	0.172886	0.14839	0.078356	0.100926	0.121391	0.119849	0.0631856	0.164849	-	-	-	-	0.0441149
29 (R)-2,3-Dihydroxy-3-methylbutanoic acid-13C-4	1045570	984883	389764	133186	163667	243752	-	-	79912	-	-	-	-	-	-	-	-	-	-	-	-	-	-	-	-	-	-	-	-	-	-	-	0.0559457	0.0548957	0.039945	0.0225385	0.0169575	0.0260353	0	0	0.0147554	0	0	0	-	-	-	-	0
30 (R)-2,3-Dihydroxy-3-methylbutanoic acid-13C-5	10851613	10452883	5304968	3452588	6266282	6436264	1063182	903976	4017922	1365787	832198	212830	-	-	-	-	817926	1282685	-	-	-	-	528442	424458	-	137625	446192	-	-	-	-	-	0.580641	0.582626	0.54368	0.584267	0.649247	0.687462	0.826218	0.750239	0.74189	0.736766	0.875056	0.641862	-	-	-	-	0.955885
37 L-Valine-13C-0	3668403	3246185	-	2859488	6378384	5823962	11388085	4163184	4947114	4696224	4438010	5409786	4500297	5466161	6157072	5139476	6822156	5035015	7222072	3973689	5843177	7217747	6468664	6281982	7149830	6662232	6319719	6224416	6470991	6400672	6599444	8045234	0.44826	0.456146	0	0.487873	0.316875	0.279149	0.669548	0.494697	0.249169	0.395747	0.429009	0.587156	0.568326	0.531592	0.531711	0.537902	0.416533
38 L-Valine-13C-1	226234	176262	171375	147017	482392	412771	709628	253177	354054	299830	257215	310613	194482	309046	341553	290813	475920	328969	488502	230568	412154	476789	490241	467141	500052	480553	415604	422139	370176	430599	425586	534838	0.0276446	0.0247679	0.0541936	0.0250834	0.023965	0.0197846	0.0417217	0.0300842	0.0178324	0.0252664	0.0248642	0.0337126	0.0245604	0.0300552	0.0294958	0.0304367	0.0290577
39 L-Valine-13C-2	780962	691067	662516	612094	2724421	2651423	1230404	1076312	2550447	1581375	1476246	1081449	663073	919120	1207797	1071197	2263511	1914306	3363443	1412243	2545185	2729634	2536643	2418238	2532040	2360679	2054551	2007736	1949355	1673977	2116491	2689729	0.0954295	0.097107	0.209506	0.104433	0.135348	0.127086	0.07234	0.127895	0.128457	0.133261	0.142704	0.117376	0.083737	0.0893858	0.104303	0.112112	0.138201
40 L-Valine-13C-3	893310	696263	619073	629519	2744576	2880304	1241468	1092014	2642227	1819065	1597748	994881	719031	912756	1217152	984060	2252531	1975510	3661868	1448859	2690808	2613498	2562192	2489935	2531211	2488237	2106773	1959238	2031079	1776833	2029845	2805514	0.109158	0.0978371	0.195768	0.107406	0.136349	0.138056	0.0729905	0.12976	0.13308	0.153291	0.154449	0.10798	0.0908038	0.0887669	0.105111	0.102992	0.13753
41 L-Valine-13C-4	237732	222621	178409	177862	727832	709442	177340	151600	844907	341215	259895	115824	184058	228784	254618	181546	499394	522895	894520	332412	551796	463498	427387	395886	406604	408781	265648	297428	224497	169290	271610	344277	0.0290496	0.0312821	0.0564179	0.030346	0.0361583	0.0340043	0.0104265	0.0180141	0.042555	0.0287539	0.0251232	0.0125711	0.023244	0.0222496	0.0219883	0.0190007	0.0304909
42 L-Valine-13C-5	2377013	2084154	1530903	1435153	7071434	8385380	2261699	1679330	8515730	3129036	2315690	1300995	1657573	2446749	2401533	1887586	4064923	4590156	8365472	3455589	5510996	4159071	3946878	3856284	3882686	3884986	2598782	2528527	2193877	2083797	2591998	3480566	0.290459	0.29286	0.484114	0.244859	0.351305	0.40192	0.132974	0.199549	0.428907	0.263681	0.223851	0.141205	0.209329	0.23795	0.207391	0.197556	0.248188
43 Valine-IS-13C,15N-5,1	36514148	36355712	37602352	36056836	32978402	30115888	35400468	35275984	32211452	33757328	34298272	34759612	35111664	36758768	36653728	35603224	35192704	32324028	35286856	36789812	35424072	34978476	33571608	32841458	34282052	35264528	32607708	33913424	33720584	31778370	32742742	34552088	NA	NA	NA	NA	NA	NA	NA	NA	NA	NA	NA	NA	NA	NA	NA	NA	NA
Cell number	508500	536400	611280	695160	272200	260480	302400	276150	452750	312900	387700	210750	662400	632100	646800	689700	342000	442500	322900	461950	381300	255250	284500	282850	224300	302900	245800	308900	173738	173738	318975	308925
Extraction volume	1017	1073	1223	1390	544	521	605	552	906	626	775	422	1325	1264	1294	1379	684	885	646	924	763	511	569	566	449	606	492	618	347	347	638	618
Moles: Internal standard (Valine-IS-13C,15N-5,1)	5.085e-10	5.365e-10	6.115e-10	6.95e-10	2.72e-10	2.605e-10	3.025e-10	2.76e-10	4.53e-10	3.13e-10	3.875e-10	2.11e-10	6.625e-10	6.32e-10	6.47e-10	6.895e-10	3.42e-10	4.425e-10	3.23e-10	4.62e-10	3.815e-10	2.555e-10	2.845e-10	2.83e-10	2.245e-10	3.03e-10	2.46e-10	3.09e-10	1.735e-10	1.735e-10	3.19e-10	3.09e-10
Moles: Endogenous valine	1.13966e-10	1.05019e-10	5.14258e-11	1.12974e-10	1.66021e-10	1.80466e-10	1.4534e-10	6.5844e-11	2.7922e-10	1.10029e-10	1.16875e-10	5.59287e-11	1.49409e-10	1.76791e-10	2.04402e-10	1.85038e-10	1.59164e-10	1.96675e-10	2.19647e-10	1.36295e-10	1.89049e-10	1.28999e-10	1.39252e-10	1.37094e-10	1.11342e-10	1.39928e-10	1.03817e-10	1.22453e-10	6.81227e-11	6.84381e-11	1.36737e-10	1.60081e-10
Moles per million cells	2.24123e-10	1.95784e-10	8.41281e-11	1.62515e-10	6.09922e-10	6.9282e-10	4.80622e-10	2.38435e-10	6.1672e-10	3.51643e-10	3.01457e-10	2.65379e-10	2.25558e-10	2.79688e-10	3.1602e-10	2.68288e-10	4.65393e-10	4.44464e-10	6.80234e-10	2.95042e-10	4.95802e-10	5.05383e-10	4.89461e-10	4.84689e-10	4.96399e-10	4.61961e-10	4.22363e-10	3.96416e-10	3.921e-10	3.93916e-10	4.28677e-10	5.18189e-10
Picomoles per million cells	224.123	195.784	84.1281	162.515	609.922	692.82	480.622	238.435	616.72	351.643	301.457	265.379	225.558	279.688	316.02	268.288	465.393	444.464	680.234	295.042	495.802	505.383	489.461	484.689	496.399	461.961	422.363	396.416	392.1	393.916	428.677	518.189
[truncated: 15 more columns]
