# Supplementary material for: Resurrecting essential amino acid biosynthesis in mammalian cells
Source: eLife journal article supplement (doi:10.7554/elife.72847), 2022-09-27
Supplement: supp [file Figure 4-source data 1.xlsx]

## Sheet: B - gDNA
Experiment: 20220606_ilvD_gDNA_newprimers_moregDNA Selected Filter: SYBR Green I / HRM Dye (465-510)																		Averaged Ct							Delta Ct (ilvD - gapdh)					Compare to MTIV, ilvD
Include	Color	Pos	Name	Cp	Concentration	Standard	Status					GAPDH	ilvD internal	ilvD-bGH	ilvD-WPRE			GAPDH	ilvD internal	ilvD-bGH	ilvD-WPRE				aggregate	bGH	WPRE			Dd_Ct	Fold change	Range	Fold change error
TRUE	255	A1	Sample 1	18.87		0				gDNA	pCtrl	18.87	34.44	32.59	35.54		pCtrl	18.8067	34.5467	33.3267	36.4767		pCtrl	Avg	15.74	14.52	17.67		pCtrl	6.83333	0.00876923	0.00697722	0.00179201
TRUE	255	A2	Sample 2	18.86		0						18.86	34.9	33.85	37.27			0.10116	0.3139	0.656531	0.873861			St dev	0.329798	0.664279	0.879697			0.329798		0.0110215	-0.00225227
TRUE	255	A3	Sample 3	18.69		0						18.69	34.3	33.54	36.62
TRUE	255	A4	Sample 4	18.47		0					pCtrl ilvD+	18.47	24.9	30.83	23.99		pCtrl ilvD+	18.4367	24.8367	30.4133	23.8833		pCtrl ilvD+	Avg	6.4	11.9767	5.44667		pCtrl ilvD+	-2.50667	5.68305	5.43439	0.248669
TRUE	255	A5	Sample 5	18.43		0						18.43	24.79	29.76	23.78			0.0305505	0.0568624	0.572917	0.10504			St dev	0.0645497	0.57373	0.109392			0.0645497		5.9431	-0.260048
TRUE	255	A6	Sample 6	18.41		0						18.41	24.82	30.65	23.88
TRUE	255	A7	Sample 7	19.2		0					pMTIV	19.2	28.28	23.3	34.85		pMTIV	18.9867	27.8933	23.33	34.5067		pMTIV	Avg	8.90667	4.34333	15.52		pMTIV	0	1	0.744268	0.255732
TRUE	255	A8	Sample 8	18.96		0						18.96	27.87	23.72	34.72			0.201329	0.375544	0.375899	0.48645			St dev	0.426106	0.426419	0.526466			0.426106		1.3436	-0.343603
TRUE	255	A9	Sample 9	18.8		0						18.8	27.53	22.97	33.95
TRUE	255	A10	Sample 10	18.41		0					pMTIV ilvD+	18.41	24.48	22.6	23.74		pMTIV ilvD+	18.57	24.4633	22.6533	23.5933		pMTIV ilvD+	Avg	5.89333	4.08333	5.02333		pMTIV ilvD+	-3.01333	8.07428	7.10776	0.966519
TRUE	255	A11	Sample 11	18.53		0						18.53	24.46	22.7	23.3			0.183303	0.0152753	0.0503322	0.254034			St dev	0.183938	0.190088	0.313262			0.183938		9.17222	-1.09795
TRUE	255	A12	Sample 12	18.77		0						18.77	24.45	22.66	23.74
TRUE	65280	A13	Sample 13			0				Ctrls	NTC	0	0	37.27	0		NTC	-	-	-	-
TRUE	65280	A14	Sample 14			0						0	37.32	35.82	0
TRUE	65280	A15	Sample 15			0						0	36.92	36.77	0
TRUE	65280	A16	Sample 16			0					ilvD plasmid	0	7.34	7	15.39		ilvD plasmid	-	7.51	6.94667	-
TRUE	65280	A17	Sample 17			0						0	7.38	6.73	0				0.260576	0.195533
TRUE	255	A18	Sample 18	9.92		0						9.92	7.81	7.11	10.9
TRUE	65280	A19	Sample 19			0
TRUE	65280	A20	Sample 20			0
TRUE	65280	A21	Sample 21			0
TRUE	65280	A22	Sample 22			0
TRUE	65280	A23	Sample 23			0
TRUE	65280	A24	Sample 24			0
TRUE	255	B1	Sample 25	34.44		0
TRUE	255	B2	Sample 26	34.9		0
TRUE	255	B3	Sample 27	34.3		0
TRUE	255	B4	Sample 28	24.9		0
TRUE	255	B5	Sample 29	24.79		0
TRUE	255	B6	Sample 30	24.82		0
TRUE	255	B7	Sample 31	28.28		0
TRUE	255	B8	Sample 32	27.87		0
TRUE	255	B9	Sample 33	27.53		0
TRUE	255	B10	Sample 34	24.48		0
TRUE	255	B11	Sample 35	24.46		0
TRUE	255	B12	Sample 36	24.45		0
TRUE	65280	B13	Sample 37			0
TRUE	255	B14	Sample 38	37.32		0
TRUE	255	B15	Sample 39	36.92		0
TRUE	255	B16	Sample 40	7.34		0
TRUE	255	B17	Sample 41	7.38		0
TRUE	255	B18	Sample 42	7.81		0
TRUE	65280	B19	Sample 43			0
TRUE	65280	B20	Sample 44			0
TRUE	65280	B21	Sample 45			0
TRUE	65280	B22	Sample 46			0
TRUE	65280	B23	Sample 47			0
TRUE	65280	B24	Sample 48			0
TRUE	255	C1	Sample 49	32.59		0
TRUE	255	C2	Sample 50	33.85		0
TRUE	255	C3	Sample 51	33.54		0
TRUE	255	C4	Sample 52	30.83		0
TRUE	255	C5	Sample 53	29.76		0
TRUE	255	C6	Sample 54	30.65		0
TRUE	255	C7	Sample 55	23.3		0
TRUE	255	C8	Sample 56	23.72		0
TRUE	255	C9	Sample 57	22.97		0
TRUE	255	C10	Sample 58	22.6		0
TRUE	255	C11	Sample 59	22.7		0
TRUE	255	C12	Sample 60	22.66		0
TRUE	255	C13	Sample 61	37.27		0
TRUE	255	C14	Sample 62	35.82		0
TRUE	255	C15	Sample 63	36.77		0
TRUE	255	C16	Sample 64	7		0
TRUE	255	C17	Sample 65	6.73		0
TRUE	255	C18	Sample 66	7.11		0
TRUE	65280	C19	Sample 67			0
TRUE	65280	C20	Sample 68			0
TRUE	65280	C21	Sample 69			0
TRUE	65280	C22	Sample 70			0
TRUE	65280	C23	Sample 71			0
TRUE	65280	C24	Sample 72			0
TRUE	255	D1	Sample 73	35.54		0
TRUE	255	D2	Sample 74	37.27		0
TRUE	255	D3	Sample 75	36.62		0
TRUE	255	D4	Sample 76	23.99		0
TRUE	255	D5	Sample 77	23.78		0
TRUE	255	D6	Sample 78	23.88		0
TRUE	255	D7	Sample 79	34.85		0
TRUE	255	D8	Sample 80	34.72		0
TRUE	255	D9	Sample 81	33.95		0
TRUE	255	D10	Sample 82	23.74		0
TRUE	255	D11	Sample 83	23.3		0
TRUE	255	D12	Sample 84	23.74		0
TRUE	65280	D13	Sample 85			0
TRUE	65280	D14	Sample 86			0
TRUE	65280	D15	Sample 87			0
TRUE	255	D16	Sample 88	15.39		0
TRUE	65280	D17	Sample 89			0
TRUE	255	D18	Sample 90	10.9		0
TRUE	65280	D19	Sample 91			0
TRUE	65280	D20	Sample 92			0
TRUE	65280	D21	Sample 93			0
TRUE	65280	D22	Sample 94			0
TRUE	65280	D23	Sample 95			0
TRUE	65280	D24	Sample 96			0
TRUE	65280	E1	Sample 97			0
TRUE	65280	E2	Sample 98			0
TRUE	65280	E3	Sample 99			0
TRUE	65280	E4	Sample 100			0
TRUE	65280	E5	Sample 101			0
TRUE	65280	E6	Sample 102			0
TRUE	65280	E7	Sample 103			0
TRUE	65280	E8	Sample 104			0
TRUE	65280	E9	Sample 105			0
TRUE	65280	E10	Sample 106			0
TRUE	65280	E11	Sample 107			0
TRUE	65280	E12	Sample 108			0
TRUE	65280	E13	Sample 109			0
TRUE	65280	E14	Sample 110			0
TRUE	65280	E15	Sample 111			0
TRUE	65280	E16	Sample 112			0
TRUE	65280	E17	Sample 113			0
TRUE	65280	E18	Sample 114			0
TRUE	65280	E19	Sample 115			0
TRUE	65280	E20	Sample 116			0
TRUE	65280	E21	Sample 117			0
TRUE	65280	E22	Sample 118			0
TRUE	65280	E23	Sample 119			0
TRUE	65280	E24	Sample 120			0
TRUE	65280	F1	Sample 121			0
TRUE	65280	F2	Sample 122			0
TRUE	65280	F3	Sample 123			0
TRUE	65280	F4	Sample 124			0
TRUE	65280	F5	Sample 125			0
TRUE	65280	F6	Sample 126			0
TRUE	65280	F7	Sample 127			0
TRUE	65280	F8	Sample 128			0
TRUE	65280	F9	Sample 129			0
TRUE	65280	F10	Sample 130			0
TRUE	65280	F11	Sample 131			0
TRUE	65280	F12	Sample 132			0
TRUE	65280	F13	Sample 133			0
TRUE	65280	F14	Sample 134			0
TRUE	65280	F15	Sample 135			0
TRUE	65280	F16	Sample 136			0
TRUE	65280	F17	Sample 137			0
TRUE	65280	F18	Sample 138			0
TRUE	65280	F19	Sample 139			0
TRUE	65280	F20	Sample 140			0
TRUE	65280	F21	Sample 141			0
TRUE	65280	F22	Sample 142			0
TRUE	65280	F23	Sample 143			0
TRUE	65280	F24	Sample 144			0
TRUE	65280	G1	Sample 145			0
TRUE	65280	G2	Sample 146			0
TRUE	65280	G3	Sample 147			0
TRUE	65280	G4	Sample 148			0
TRUE	65280	G5	Sample 149			0
TRUE	65280	G6	Sample 150			0
TRUE	65280	G7	Sample 151			0
TRUE	65280	G8	Sample 152			0
TRUE	65280	G9	Sample 153			0
TRUE	65280	G10	Sample 154			0
TRUE	65280	G11	Sample 155			0
TRUE	65280	G12	Sample 156			0
TRUE	65280	G13	Sample 157			0
TRUE	65280	G14	Sample 158			0
TRUE	65280	G15	Sample 159			0
TRUE	65280	G16	Sample 160			0
TRUE	65280	G17	Sample 161			0
TRUE	65280	G18	Sample 162			0
TRUE	65280	G19	Sample 163			0
TRUE	65280	G20	Sample 164			0
TRUE	65280	G21	Sample 165			0
TRUE	65280	G22	Sample 166			0
TRUE	65280	G23	Sample 167			0
TRUE	65280	G24	Sample 168			0
TRUE	65280	H1	Sample 169			0
TRUE	65280	H2	Sample 170			0
TRUE	65280	H3	Sample 171			0
TRUE	65280	H4	Sample 172			0
TRUE	65280	H5	Sample 173			0
TRUE	65280	H6	Sample 174			0
TRUE	65280	H7	Sample 175			0
TRUE	65280	H8	Sample 176			0
TRUE	65280	H9	Sample 177			0
TRUE	65280	H10	Sample 178			0
TRUE	65280	H11	Sample 179			0
TRUE	65280	H12	Sample 180			0
TRUE	65280	H13	Sample 181			0
TRUE	65280	H14	Sample 182			0
TRUE	65280	H15	Sample 183			0
TRUE	65280	H16	Sample 184			0
TRUE	65280	H17	Sample 185			0
TRUE	65280	H18	Sample 186			0
TRUE	65280	H19	Sample 187			0
TRUE	65280	H20	Sample 188			0
TRUE	65280	H21	Sample 189			0
TRUE	65280	H22	Sample 190			0
TRUE	65280	H23	Sample 191			0
TRUE	65280	H24	Sample 192			0
TRUE	65280	I1	Sample 193			0
TRUE	65280	I2	Sample 194			0
TRUE	65280	I3	Sample 195			0
TRUE	65280	I4	Sample 196			0
TRUE	65280	I5	Sample 197			0
TRUE	65280	I6	Sample 198			0
TRUE	65280	I7	Sample 199			0
TRUE	65280	I8	Sample 200			0
TRUE	65280	I9	Sample 201			0
TRUE	65280	I10	Sample 202			0
TRUE	65280	I11	Sample 203			0
TRUE	65280	I12	Sample 204			0
TRUE	65280	I13	Sample 205			0
TRUE	65280	I14	Sample 206			0
TRUE	65280	I15	Sample 207			0
TRUE	65280	I16	Sample 208			0
TRUE	65280	I17	Sample 209			0
TRUE	65280	I18	Sample 210			0
TRUE	65280	I19	Sample 211			0
TRUE	65280	I20	Sample 212			0
TRUE	65280	I21	Sample 213			0
TRUE	65280	I22	Sample 214			0
TRUE	65280	I23	Sample 215			0
TRUE	65280	I24	Sample 216			0
TRUE	65280	J1	Sample 217			0
TRUE	65280	J2	Sample 218			0
TRUE	65280	J3	Sample 219			0
TRUE	65280	J4	Sample 220			0
TRUE	65280	J5	Sample 221			0
TRUE	65280	J6	Sample 222			0
TRUE	65280	J7	Sample 223			0
TRUE	65280	J8	Sample 224			0
TRUE	65280	J9	Sample 225			0
TRUE	65280	J10	Sample 226			0
TRUE	65280	J11	Sample 227			0
TRUE	65280	J12	Sample 228			0
TRUE	65280	J13	Sample 229			0
TRUE	65280	J14	Sample 230			0
TRUE	65280	J15	Sample 231			0
TRUE	65280	J16	Sample 232			0
TRUE	65280	J17	Sample 233			0
TRUE	65280	J18	Sample 234			0
TRUE	65280	J19	Sample 235			0
TRUE	65280	J20	Sample 236			0
TRUE	65280	J21	Sample 237			0
TRUE	65280	J22	Sample 238			0
TRUE	65280	J23	Sample 239			0
TRUE	65280	J24	Sample 240			0
TRUE	65280	K1	Sample 241			0
TRUE	65280	K2	Sample 242			0
TRUE	65280	K3	Sample 243			0
TRUE	65280	K4	Sample 244			0
TRUE	65280	K5	Sample 245			0
TRUE	65280	K6	Sample 246			0
TRUE	65280	K7	Sample 247			0
TRUE	65280	K8	Sample 248			0
TRUE	65280	K9	Sample 249			0
TRUE	65280	K10	Sample 250			0
TRUE	65280	K11	Sample 251			0
TRUE	65280	K12	Sample 252			0
TRUE	65280	K13	Sample 253			0
TRUE	65280	K14	Sample 254			0
TRUE	65280	K15	Sample 255			0
TRUE	65280	K16	Sample 256			0
TRUE	65280	K17	Sample 257			0
TRUE	65280	K18	Sample 258			0
TRUE	65280	K19	Sample 259			0
TRUE	65280	K20	Sample 260			0
TRUE	65280	K21	Sample 261			0
TRUE	65280	K22	Sample 262			0
TRUE	65280	K23	Sample 263			0
TRUE	65280	K24	Sample 264			0
TRUE	65280	L1	Sample 265			0
TRUE	65280	L2	Sample 266			0
TRUE	65280	L3	Sample 267			0
TRUE	65280	L4	Sample 268			0
TRUE	65280	L5	Sample 269			0
TRUE	65280	L6	Sample 270			0
TRUE	65280	L7	Sample 271			0
TRUE	65280	L8	Sample 272			0
TRUE	65280	L9	Sample 273			0
TRUE	65280	L10	Sample 274			0
TRUE	65280	L11	Sample 275			0
TRUE	65280	L12	Sample 276			0
TRUE	65280	L13	Sample 277			0
TRUE	65280	L14	Sample 278			0
TRUE	65280	L15	Sample 279			0
TRUE	65280	L16	Sample 280			0
TRUE	65280	L17	Sample 281			0
TRUE	65280	L18	Sample 282			0
TRUE	65280	L19	Sample 283			0
TRUE	65280	L20	Sample 284			0
TRUE	65280	L21	Sample 285			0
TRUE	65280	L22	Sample 286			0
TRUE	65280	L23	Sample 287			0
TRUE	65280	L24	Sample 288			0
TRUE	65280	M1	Sample 289			0
TRUE	65280	M2	Sample 290			0
TRUE	65280	M3	Sample 291			0
TRUE	65280	M4	Sample 292			0
TRUE	65280	M5	Sample 293			0
TRUE	65280	M6	Sample 294			0
TRUE	65280	M7	Sample 295			0
TRUE	65280	M8	Sample 296			0
TRUE	65280	M9	Sample 297			0
TRUE	65280	M10	Sample 298			0
TRUE	65280	M11	Sample 299			0
TRUE	65280	M12	Sample 300			0
TRUE	65280	M13	Sample 301			0
TRUE	65280	M14	Sample 302			0
TRUE	65280	M15	Sample 303			0
TRUE	65280	M16	Sample 304			0
TRUE	65280	M17	Sample 305			0
TRUE	65280	M18	Sample 306			0
TRUE	65280	M19	Sample 307			0
TRUE	65280	M20	Sample 308			0
TRUE	65280	M21	Sample 309			0
TRUE	65280	M22	Sample 310			0
TRUE	65280	M23	Sample 311			0
TRUE	65280	M24	Sample 312			0
TRUE	65280	N1	Sample 313			0
TRUE	65280	N2	Sample 314			0
TRUE	65280	N3	Sample 315			0
TRUE	65280	N4	Sample 316			0
TRUE	65280	N5	Sample 317			0
TRUE	65280	N6	Sample 318			0
TRUE	65280	N7	Sample 319			0
TRUE	65280	N8	Sample 320			0
TRUE	65280	N9	Sample 321			0
TRUE	65280	N10	Sample 322			0
TRUE	65280	N11	Sample 323			0
TRUE	65280	N12	Sample 324			0
TRUE	65280	N13	Sample 325			0
TRUE	65280	N14	Sample 326			0
TRUE	65280	N15	Sample 327			0
TRUE	65280	N16	Sample 328			0
TRUE	65280	N17	Sample 329			0
TRUE	65280	N18	Sample 330			0
TRUE	65280	N19	Sample 331			0
TRUE	65280	N20	Sample 332			0
TRUE	65280	N21	Sample 333			0
TRUE	65280	N22	Sample 334			0
TRUE	65280	N23	Sample 335			0
TRUE	65280	N24	Sample 336			0
TRUE	65280	O1	Sample 337			0
TRUE	65280	O2	Sample 338			0
TRUE	65280	O3	Sample 339			0
TRUE	65280	O4	Sample 340			0
TRUE	65280	O5	Sample 341			0
TRUE	65280	O6	Sample 342			0
TRUE	65280	O7	Sample 343			0
TRUE	65280	O8	Sample 344			0
TRUE	65280	O9	Sample 345			0
TRUE	65280	O10	Sample 346			0
TRUE	65280	O11	Sample 347			0
TRUE	65280	O12	Sample 348			0
TRUE	65280	O13	Sample 349			0
TRUE	65280	O14	Sample 350			0
TRUE	65280	O15	Sample 351			0
TRUE	65280	O16	Sample 352			0
TRUE	65280	O17	Sample 353			0
TRUE	65280	O18	Sample 354			0
TRUE	65280	O19	Sample 355			0
TRUE	65280	O20	Sample 356			0
TRUE	65280	O21	Sample 357			0
TRUE	65280	O22	Sample 358			0
TRUE	65280	O23	Sample 359			0
TRUE	65280	O24	Sample 360			0
TRUE	65280	P1	Sample 361			0
TRUE	65280	P2	Sample 362			0
TRUE	65280	P3	Sample 363			0
TRUE	65280	P4	Sample 364			0
TRUE	65280	P5	Sample 365			0
TRUE	65280	P6	Sample 366			0
TRUE	65280	P7	Sample 367			0
TRUE	65280	P8	Sample 368			0
TRUE	65280	P9	Sample 369			0
TRUE	65280	P10	Sample 370			0
TRUE	65280	P11	Sample 371			0
TRUE	65280	P12	Sample 372			0
TRUE	65280	P13	Sample 373			0
TRUE	65280	P14	Sample 374			0
TRUE	65280	P15	Sample 375			0
TRUE	65280	P16	Sample 376			0
TRUE	65280	P17	Sample 377			0
TRUE	65280	P18	Sample 378			0
TRUE	65280	P19	Sample 379			0
TRUE	65280	P20	Sample 380			0
TRUE	65280	P21	Sample 381			0
TRUE	65280	P22	Sample 382			0
TRUE	65280	P23	Sample 383			0
TRUE	65280	P24	Sample 384			0

## Sheet: B - cDNA
Experiment: 20220602_ilvD_cDNA_gDNA_newprimers_2 Selected Filter: SYBR Green I / HRM Dye (465-510)																Averaged Ct				Delta Ct (ilvD - gapdh)				Compare to pMTIV
Include	Color	Pos	Name	Cp	Concentration	Standard	Status					GAPDH	ilvD				GAPDH	ilvD						Dd Ct	Fold change	Range	Fold change error
TRUE	255	A1	Sample 1	34.31		0				cDNA	pCtrl -RT	34.31	33.49		pCtrl -RT	Avg	34.74	34.44		pCtrl -RT	-0.3		pCtrl	10.9967	0.000489411	0.000217033	0.000272377
TRUE	255	A2	Sample 2	34.71		0						34.71	35.07			St dev	0.445758	0.837198			0.948472			1.17313		0.00110362	0.000614212
TRUE	255	A3	Sample 3	35.2		0						35.2	34.76
TRUE	255	A4	Sample 4	15.58		0					pCtrl +RT	15.58	35.65		pCtrl +RT	Avg	15.81	35.0167		pCtrl +RT	19.2067		pCtrl-ilvD+	1.88667	0.270431	0.19541	0.0750212
TRUE	255	A5	Sample 5	16.05		0						16.05	35.71			St dev	0.23516	1.14932			1.17313			0.468757		0.374254	0.103823
TRUE	255	A6	Sample 6	15.8		0						15.8	33.69
TRUE	255	A7	Sample 7	34.94		0					pCtrl-ilvD+ -RT	34.94	35.08		pCtrl-ilvD+ -RT	Avg	35.5433	34.2033		pCtrl-ilvD+ -RT	-1.34		pMTIV	0	1	0.884302	0.115698
TRUE	255	A8	Sample 8	36.25		0						36.25	33.72			St dev	0.661085	0.760548			1.0077			0.177388		1.13084	0.130835
TRUE	255	A9	Sample 9	35.44		0						35.44	33.81
TRUE	255	A10	Sample 10	14.85		0					pCtrl-ilvD+ +RT	14.85	25.18		pCtrl-ilvD+ +RT	Avg	15.1133	25.21		pCtrl-ilvD+ +RT	10.0967		pMTIV-ilvD+	-0.62	1.53688	1.24297	0.293909
TRUE	255	A11	Sample 11	14.85		0						14.85	25.12			St dev	0.456107	0.108167			0.468757			0.306213		1.90028	0.363407
TRUE	255	A12	Sample 12	15.64		0						15.64	25.33
TRUE	255	A13	Sample 13	32.32		0					pMTIV -RT	32.32	34.98		pMTIV -RT	Avg	32.6133	34.62		pMTIV -RT	2.00667
TRUE	255	A14	Sample 14	32.63		0						32.63	35.34			St dev	0.285365	0.95247			0.9943
TRUE	255	A15	Sample 15	32.89		0						32.89	33.54
TRUE	255	A16	Sample 16	13.48		0					pMTIV +RT	13.48	21.71		pMTIV +RT	Avg	13.5767	21.7867		pMTIV +RT	8.21
TRUE	255	A17	Sample 17	13.73		0						13.73	21.73			St dev	0.134288	0.115902			0.177388
TRUE	255	A18	Sample 18	13.52		0						13.52	21.92
TRUE	255	A19	Sample 19	31.64		0					pMTIV-ilvD+ -RT	31.64	32.53		pMTIV-ilvD+ -RT	Avg	31.8167	33.92		pMTIV-ilvD+ -RT	2.10333
TRUE	255	A20	Sample 20	32.06		0						32.06	34.61			St dev	0.217792	1.20379			1.22333
TRUE	255	A21	Sample 21	31.75		0						31.75	34.62
TRUE	255	A22	Sample 22	13.84		0					pMTIV-ilvD+ +RT	13.84	21.84		pMTIV-ilvD+ +RT	Avg	13.9767	21.5667		pMTIV-ilvD+ +RT	7.59
TRUE	255	A23	Sample 23	13.92		0						13.92	21.34			St dev	0.172143	0.253246			0.306213
TRUE	255	A24	Sample 24	14.17		0						14.17	21.52
TRUE	65280	B1	Sample 25			0				Ctrls	noDNA	0	34.76
TRUE	65280	B2	Sample 26			0						0	34.96
TRUE	65280	B3	Sample 27			0						0	35.1
TRUE	65280	B4	Sample 28			0					ilvD plasmid	0	7.3
TRUE	65280	B5	Sample 29			0						0	8.38
TRUE	65280	B6	Sample 30			0						0	6.97
TRUE	255	B7	Sample 31	21.88		0
TRUE	255	B8	Sample 32	21.89		0
TRUE	255	B9	Sample 33	21.8		0
TRUE	255	B10	Sample 34	20.9		0
TRUE	255	B11	Sample 35	21.37		0
TRUE	255	B12	Sample 36	21.13		0
TRUE	255	B13	Sample 37	22.2		0
TRUE	255	B14	Sample 38	22.21		0
TRUE	255	B15	Sample 39	22.06		0
TRUE	255	B16	Sample 40	21.29		0
TRUE	255	B17	Sample 41	21.8		0
TRUE	255	B18	Sample 42	21.63		0
TRUE	65280	B19	Sample 43			0
TRUE	65280	B20	Sample 44			0
TRUE	65280	B21	Sample 45			0
TRUE	65280	B22	Sample 46			0
TRUE	65280	B23	Sample 47			0
TRUE	65280	B24	Sample 48			0
TRUE	255	C1	Sample 49	33.49		0
TRUE	255	C2	Sample 50	35.07		0
TRUE	255	C3	Sample 51	34.76		0
TRUE	255	C4	Sample 52	35.65		0
TRUE	255	C5	Sample 53	35.71		0
TRUE	255	C6	Sample 54	33.69		0
TRUE	255	C7	Sample 55	35.08		0
TRUE	255	C8	Sample 56	33.72		0
TRUE	255	C9	Sample 57	33.81		0
TRUE	255	C10	Sample 58	25.18		0
TRUE	255	C11	Sample 59	25.12		0
TRUE	255	C12	Sample 60	25.33		0
TRUE	255	C13	Sample 61	34.98		0
TRUE	255	C14	Sample 62	35.34		0
TRUE	255	C15	Sample 63	33.54		0
TRUE	255	C16	Sample 64	21.71		0
TRUE	255	C17	Sample 65	21.73		0
TRUE	255	C18	Sample 66	21.92		0
TRUE	255	C19	Sample 67	32.53		0
TRUE	255	C20	Sample 68	34.61		0
TRUE	255	C21	Sample 69	34.62		0
TRUE	255	C22	Sample 70	21.84		0
TRUE	255	C23	Sample 71	21.34		0
TRUE	255	C24	Sample 72	21.52		0
TRUE	255	D1	Sample 73	34.76		0
TRUE	255	D2	Sample 74	34.96		0
TRUE	255	D3	Sample 75	35.1		0
TRUE	255	D4	Sample 76	7.3		0
TRUE	255	D5	Sample 77	8.38		0
TRUE	255	D6	Sample 78	6.97		0
TRUE	255	D7	Sample 79	29.66		0
TRUE	255	D8	Sample 80	29.61		0
TRUE	255	D9	Sample 81	29.91		0
TRUE	255	D10	Sample 82	27.53		0
TRUE	255	D11	Sample 83	27.26		0
TRUE	255	D12	Sample 84	27.28		0
TRUE	255	D13	Sample 85	30.51		0
TRUE	255	D14	Sample 86	30.55		0
TRUE	255	D15	Sample 87	30.58		0
TRUE	255	D16	Sample 88	27.23		0
TRUE	255	D17	Sample 89	27.11		0
TRUE	255	D18	Sample 90	27.48		0
TRUE	65280	D19	Sample 91			0
TRUE	65280	D20	Sample 92			0
TRUE	65280	D21	Sample 93			0
TRUE	65280	D22	Sample 94			0
TRUE	65280	D23	Sample 95			0
TRUE	65280	D24	Sample 96			0
TRUE	65280	E1	Sample 97			0
TRUE	65280	E2	Sample 98			0
TRUE	65280	E3	Sample 99			0
TRUE	65280	E4	Sample 100			0
TRUE	65280	E5	Sample 101			0
TRUE	65280	E6	Sample 102			0
TRUE	65280	E7	Sample 103			0
TRUE	255	E8	Sample 104	15.35		0
TRUE	65280	E9	Sample 105			0
TRUE	65280	E10	Sample 106			0
TRUE	65280	E11	Sample 107			0
TRUE	65280	E12	Sample 108			0
TRUE	65280	E13	Sample 109			0
TRUE	65280	E14	Sample 110			0
TRUE	65280	E15	Sample 111			0
TRUE	65280	E16	Sample 112			0
TRUE	65280	E17	Sample 113			0
TRUE	65280	E18	Sample 114			0
TRUE	65280	E19	Sample 115			0
TRUE	65280	E20	Sample 116			0
TRUE	65280	E21	Sample 117			0
TRUE	65280	E22	Sample 118			0
TRUE	65280	E23	Sample 119			0
TRUE	65280	E24	Sample 120			0
TRUE	65280	F1	Sample 121			0
TRUE	65280	F2	Sample 122			0
TRUE	65280	F3	Sample 123			0
TRUE	65280	F4	Sample 124			0
TRUE	65280	F5	Sample 125			0
TRUE	65280	F6	Sample 126			0
TRUE	65280	F7	Sample 127			0
TRUE	65280	F8	Sample 128			0
TRUE	65280	F9	Sample 129			0
TRUE	65280	F10	Sample 130			0
TRUE	65280	F11	Sample 131			0
TRUE	65280	F12	Sample 132			0
TRUE	65280	F13	Sample 133			0
TRUE	65280	F14	Sample 134			0
TRUE	65280	F15	Sample 135			0
TRUE	65280	F16	Sample 136			0
TRUE	65280	F17	Sample 137			0
TRUE	65280	F18	Sample 138			0
TRUE	65280	F19	Sample 139			0
TRUE	65280	F20	Sample 140			0
TRUE	65280	F21	Sample 141			0
TRUE	65280	F22	Sample 142			0
TRUE	65280	F23	Sample 143			0
TRUE	65280	F24	Sample 144			0
TRUE	65280	G1	Sample 145			0
TRUE	65280	G2	Sample 146			0
TRUE	65280	G3	Sample 147			0
TRUE	65280	G4	Sample 148			0
TRUE	65280	G5	Sample 149			0
TRUE	65280	G6	Sample 150			0
TRUE	65280	G7	Sample 151			0
TRUE	255	G8	Sample 152	19.59		0
TRUE	65280	G9	Sample 153			0
TRUE	255	G10	Sample 154	17.88		0
TRUE	65280	G11	Sample 155			0
TRUE	255	G12	Sample 156	16.7		0
TRUE	65280	G13	Sample 157			0
TRUE	65280	G14	Sample 158			0
TRUE	65280	G15	Sample 159			0
TRUE	65280	G16	Sample 160			0
TRUE	65280	G17	Sample 161			0
TRUE	65280	G18	Sample 162			0
TRUE	65280	G19	Sample 163			0
TRUE	65280	G20	Sample 164			0
TRUE	65280	G21	Sample 165			0
TRUE	65280	G22	Sample 166			0
TRUE	65280	G23	Sample 167			0
TRUE	65280	G24	Sample 168			0
TRUE	65280	H1	Sample 169			0
TRUE	65280	H2	Sample 170			0
TRUE	65280	H3	Sample 171			0
TRUE	65280	H4	Sample 172			0
TRUE	65280	H5	Sample 173			0
TRUE	65280	H6	Sample 174			0
TRUE	65280	H7	Sample 175			0
TRUE	255	H8	Sample 176	17.28		0
TRUE	65280	H9	Sample 177			0
TRUE	65280	H10	Sample 178			0
TRUE	65280	H11	Sample 179			0
TRUE	65280	H12	Sample 180			0
TRUE	65280	H13	Sample 181			0
TRUE	65280	H14	Sample 182			0
TRUE	65280	H15	Sample 183			0
TRUE	65280	H16	Sample 184			0
TRUE	65280	H17	Sample 185			0
TRUE	65280	H18	Sample 186			0
TRUE	65280	H19	Sample 187			0
TRUE	255	H20	Sample 188	18.83		0
TRUE	65280	H21	Sample 189			0
TRUE	65280	H22	Sample 190			0
TRUE	65280	H23	Sample 191			0
TRUE	65280	H24	Sample 192			0
TRUE	65280	I1	Sample 193			0
TRUE	65280	I2	Sample 194			0
TRUE	65280	I3	Sample 195			0
TRUE	65280	I4	Sample 196			0
TRUE	65280	I5	Sample 197			0
TRUE	65280	I6	Sample 198			0
TRUE	65280	I7	Sample 199			0
TRUE	65280	I8	Sample 200			0
TRUE	65280	I9	Sample 201			0
TRUE	65280	I10	Sample 202			0
TRUE	65280	I11	Sample 203			0
TRUE	65280	I12	Sample 204			0
TRUE	65280	I13	Sample 205			0
TRUE	65280	I14	Sample 206			0
TRUE	65280	I15	Sample 207			0
TRUE	65280	I16	Sample 208			0
TRUE	65280	I17	Sample 209			0
TRUE	255	I18	Sample 210	14.19		0
TRUE	65280	I19	Sample 211			0
TRUE	65280	I20	Sample 212			0
TRUE	65280	I21	Sample 213			0
TRUE	65280	I22	Sample 214			0
TRUE	65280	I23	Sample 215			0
TRUE	65280	I24	Sample 216			0
TRUE	65280	J1	Sample 217			0
TRUE	65280	J2	Sample 218			0
TRUE	65280	J3	Sample 219			0
TRUE	65280	J4	Sample 220			0
TRUE	65280	J5	Sample 221			0
TRUE	65280	J6	Sample 222			0
TRUE	65280	J7	Sample 223			0
TRUE	65280	J8	Sample 224			0
TRUE	65280	J9	Sample 225			0
TRUE	65280	J10	Sample 226			0
TRUE	65280	J11	Sample 227			0
TRUE	65280	J12	Sample 228			0
TRUE	65280	J13	Sample 229			0
TRUE	65280	J14	Sample 230			0
TRUE	65280	J15	Sample 231			0
TRUE	65280	J16	Sample 232			0
TRUE	65280	J17	Sample 233			0
TRUE	65280	J18	Sample 234			0
TRUE	65280	J19	Sample 235			0
TRUE	65280	J20	Sample 236			0
TRUE	65280	J21	Sample 237			0
TRUE	65280	J22	Sample 238			0
TRUE	65280	J23	Sample 239			0
TRUE	65280	J24	Sample 240			0
TRUE	65280	K1	Sample 241			0
TRUE	65280	K2	Sample 242			0
TRUE	65280	K3	Sample 243			0
TRUE	65280	K4	Sample 244			0
TRUE	65280	K5	Sample 245			0
TRUE	65280	K6	Sample 246			0
TRUE	65280	K7	Sample 247			0
TRUE	65280	K8	Sample 248			0
TRUE	65280	K9	Sample 249			0
TRUE	65280	K10	Sample 250			0
TRUE	65280	K11	Sample 251			0
TRUE	65280	K12	Sample 252			0
TRUE	65280	K13	Sample 253			0
TRUE	65280	K14	Sample 254			0
TRUE	65280	K15	Sample 255			0
TRUE	65280	K16	Sample 256			0
TRUE	65280	K17	Sample 257			0
TRUE	65280	K18	Sample 258			0
TRUE	65280	K19	Sample 259			0
TRUE	65280	K20	Sample 260			0
TRUE	65280	K21	Sample 261			0
TRUE	65280	K22	Sample 262			0
TRUE	65280	K23	Sample 263			0
TRUE	65280	K24	Sample 264			0
TRUE	65280	L1	Sample 265			0
TRUE	65280	L2	Sample 266			0
TRUE	65280	L3	Sample 267			0
TRUE	65280	L4	Sample 268			0
TRUE	65280	L5	Sample 269			0
TRUE	65280	L6	Sample 270			0
TRUE	65280	L7	Sample 271			0
TRUE	65280	L8	Sample 272			0
TRUE	65280	L9	Sample 273			0
TRUE	65280	L10	Sample 274			0
TRUE	65280	L11	Sample 275			0
TRUE	65280	L12	Sample 276			0
TRUE	65280	L13	Sample 277			0
TRUE	65280	L14	Sample 278			0
TRUE	65280	L15	Sample 279			0
TRUE	65280	L16	Sample 280			0
TRUE	65280	L17	Sample 281			0
TRUE	65280	L18	Sample 282			0
TRUE	65280	L19	Sample 283			0
TRUE	65280	L20	Sample 284			0
TRUE	65280	L21	Sample 285			0
TRUE	65280	L22	Sample 286			0
TRUE	65280	L23	Sample 287			0
TRUE	65280	L24	Sample 288			0
TRUE	65280	M1	Sample 289			0
TRUE	65280	M2	Sample 290			0
TRUE	65280	M3	Sample 291			0
TRUE	65280	M4	Sample 292			0
TRUE	65280	M5	Sample 293			0
TRUE	65280	M6	Sample 294			0
TRUE	65280	M7	Sample 295			0
TRUE	65280	M8	Sample 296			0
TRUE	65280	M9	Sample 297			0
TRUE	65280	M10	Sample 298			0
TRUE	65280	M11	Sample 299			0
TRUE	65280	M12	Sample 300			0
TRUE	65280	M13	Sample 301			0
TRUE	65280	M14	Sample 302			0
TRUE	65280	M15	Sample 303			0
TRUE	65280	M16	Sample 304			0
TRUE	65280	M17	Sample 305			0
TRUE	65280	M18	Sample 306			0
TRUE	65280	M19	Sample 307			0
TRUE	65280	M20	Sample 308			0
TRUE	65280	M21	Sample 309			0
TRUE	65280	M22	Sample 310			0
TRUE	65280	M23	Sample 311			0
TRUE	65280	M24	Sample 312			0
TRUE	65280	N1	Sample 313			0
TRUE	65280	N2	Sample 314			0
TRUE	65280	N3	Sample 315			0
TRUE	65280	N4	Sample 316			0
TRUE	65280	N5	Sample 317			0
TRUE	65280	N6	Sample 318			0
TRUE	65280	N7	Sample 319			0
TRUE	65280	N8	Sample 320			0
TRUE	65280	N9	Sample 321			0
TRUE	65280	N10	Sample 322			0
TRUE	65280	N11	Sample 323			0
TRUE	65280	N12	Sample 324			0
TRUE	65280	N13	Sample 325			0
TRUE	65280	N14	Sample 326			0
TRUE	65280	N15	Sample 327			0
TRUE	65280	N16	Sample 328			0
TRUE	65280	N17	Sample 329			0
TRUE	65280	N18	Sample 330			0
TRUE	65280	N19	Sample 331			0
TRUE	65280	N20	Sample 332			0
TRUE	65280	N21	Sample 333			0
TRUE	65280	N22	Sample 334			0
TRUE	65280	N23	Sample 335			0
TRUE	65280	N24	Sample 336			0
TRUE	65280	O1	Sample 337			0
TRUE	65280	O2	Sample 338			0
TRUE	65280	O3	Sample 339			0
TRUE	65280	O4	Sample 340			0
TRUE	65280	O5	Sample 341			0
TRUE	65280	O6	Sample 342			0
TRUE	65280	O7	Sample 343			0
TRUE	65280	O8	Sample 344			0
TRUE	65280	O9	Sample 345			0
TRUE	65280	O10	Sample 346			0
TRUE	65280	O11	Sample 347			0
TRUE	65280	O12	Sample 348			0
TRUE	65280	O13	Sample 349			0
TRUE	65280	O14	Sample 350			0
TRUE	65280	O15	Sample 351			0
TRUE	65280	O16	Sample 352			0
TRUE	65280	O17	Sample 353			0
TRUE	65280	O18	Sample 354			0
TRUE	65280	O19	Sample 355			0
TRUE	65280	O20	Sample 356			0
TRUE	65280	O21	Sample 357			0
TRUE	65280	O22	Sample 358			0
TRUE	65280	O23	Sample 359			0
TRUE	65280	O24	Sample 360			0
TRUE	65280	P1	Sample 361			0
TRUE	65280	P2	Sample 362			0
TRUE	65280	P3	Sample 363			0
TRUE	65280	P4	Sample 364			0
TRUE	65280	P5	Sample 365			0
TRUE	65280	P6	Sample 366			0
TRUE	65280	P7	Sample 367			0
TRUE	65280	P8	Sample 368			0
TRUE	65280	P9	Sample 369			0
TRUE	65280	P10	Sample 370			0
TRUE	65280	P11	Sample 371			0
TRUE	65280	P12	Sample 372			0
TRUE	65280	P13	Sample 373			0
TRUE	65280	P14	Sample 374			0
TRUE	65280	P15	Sample 375			0
TRUE	65280	P16	Sample 376			0
TRUE	65280	P17	Sample 377			0
TRUE	65280	P18	Sample 378			0
TRUE	65280	P19	Sample 379			0
TRUE	65280	P20	Sample 380			0
TRUE	65280	P21	Sample 381			0
TRUE	65280	P22	Sample 382			0
TRUE	65280	P23	Sample 383			0
TRUE	65280	P24	Sample 384			0

## Sheet: C, D, E
	Peak Intensities in Samples																																Percent Fully Labeled
Metabolite	pMTIV_Day2_Rep1	pMTIV_Day2_Rep2	pMTIV_Day4_Rep1	pMTIV_Day4_Rep2	pMTIV_Day12_Rep1	pMTIV_Day12_Rep2	pMTIV_Day14_Rep1	pMTIV_Day14_Rep2	pMTIV_Day18_Rep1	pMTIV_Day18_Rep2	pMTIV_Day24_Rep1	pMTIV_Day24_Rep2	pMTIV-ilvD+_Day2_Rep1	pMTIV-ilvD+_Day2_Rep2	pMTIV-ilvD+_Day4_Rep1	pMTIV-ilvD+_Day4_Rep2	pMTIV-ilvD+_Day8_Rep1	pMTIV-ilvD+_Day8_Rep2	pMTIV-ilvD+_Day12_Rep1	pMTIV-ilvD+_Day12_Rep2	pMTIV-ilvD+_Day16_Rep1	pMTIV-ilvD+_Day16_Rep2	pMTIV-ilvD+_Day20_Rep1	pMTIV-ilvD+_Day20_Rep2	pMTIV-ilvD+_Day24_Rep1	pMTIV-ilvD+_Day24_Rep2	pMTIV-ilvD+_Day28_Rep1	pMTIV-ilvD+_Day28_Rep2	pMTIV-ilvD+_Day32_Rep1	pMTIV-ilvD+_Day32_Rep2	pMTIV-ilvD+_Day36_Rep1	pMTIV-ilvD+_Day36_Rep2	pMTIV_Day2_Rep1	pMTIV_Day2_Rep2	pMTIV_Day4_Rep1	pMTIV_Day4_Rep2	pMTIV_Day12_Rep1	pMTIV_Day12_Rep2	pMTIV_Day14_Rep1	pMTIV_Day14_Rep2	pMTIV_Day18_Rep1	pMTIV_Day18_Rep2	pMTIV_Day24_Rep1	pMTIV_Day24_Rep2	pMTIV-ilvD+_Day2_Rep1	pMTIV-ilvD+_Day2_Rep2	pMTIV-ilvD+_Day4_Rep1	pMTIV-ilvD+_Day4_Rep2	pMTIV-ilvD+_Day8_Rep1
25 (R)-2,3-Dihydroxy-3-methylbutanoic acid-13C-0	-	-	-	-	-	-	-	-	-	-	-	-	-	-	-	-	-	-	-	-	-	-	-	-	-	-	-	-	-	-	-	-	0	0	0	0	0	0	0	0	0	0	0	0	-	-	-	-	0
26 (R)-2,3-Dihydroxy-3-methylbutanoic acid-13C-1	54240	51599	43287	-	-	-	-	-	-	-	-	-	-	-	-	-	-	-	-	-	-	-	-	-	-	-	-	-	-	-	-	-	0.00290224	0.00287604	0.00443627	0	0	0	0	0	0	0	0	0	-	-	-	-	0
27 (R)-2,3-Dihydroxy-3-methylbutanoic acid-13C-2	3313781	3172239	1964912	1190746	1553031	1293060	122795	179333	660530	265800	58734	64091	-	-	-	-	-	143644	-	-	-	-	76541	-	-	-	57385	-	-	-	-	-	0.177312	0.176815	0.201374	0.201505	0.160909	0.138113	0.0954262	0.148834	0.121964	0.143384	0.0617588	0.193289	-	-	-	-	0
28 (R)-2,3-Dihydroxy-3-methylbutanoic acid-13C-3	3423822	3279383	2054582	1132744	1668628	1389284	100829	121608	657426	222172	60091	54661	-	-	-	-	37748	76466	-	-	-	-	29526	27664	17505	26272	42513	11776	16709	-	-	15514	0.1832	0.182787	0.210564	0.19169	0.172886	0.14839	0.078356	0.100926	0.121391	0.119849	0.0631856	0.164849	-	-	-	-	0.0441149
29 (R)-2,3-Dihydroxy-3-methylbutanoic acid-13C-4	1045570	984883	389764	133186	163667	243752	-	-	79912	-	-	-	-	-	-	-	-	-	-	-	-	-	-	-	-	-	-	-	-	-	-	-	0.0559457	0.0548957	0.039945	0.0225385	0.0169575	0.0260353	0	0	0.0147554	0	0	0	-	-	-	-	0
30 (R)-2,3-Dihydroxy-3-methylbutanoic acid-13C-5	10851613	10452883	5304968	3452588	6266282	6436264	1063182	903976	4017922	1365787	832198	212830	-	-	-	-	817926	1282685	-	-	-	-	528442	424458	-	137625	446192	-	-	-	-	-	0.580641	0.582626	0.54368	0.584267	0.649247	0.687462	0.826218	0.750239	0.74189	0.736766	0.875056	0.641862	-	-	-	-	0.955885
37 L-Valine-13C-0	3668403	3246185	-	2859488	6378384	5823962	11388085	4163184	4947114	4696224	4438010	5409786	4500297	5466161	6157072	5139476	6822156	5035015	7222072	3973689	5843177	7217747	6468664	6281982	7149830	6662232	6319719	6224416	6470991	6400672	6599444	8045234	0.44826	0.456146	0	0.487873	0.316875	0.279149	0.669548	0.494697	0.249169	0.395747	0.429009	0.587156	0.568326	0.531592	0.531711	0.537902	0.416533
38 L-Valine-13C-1	226234	176262	171375	147017	482392	412771	709628	253177	354054	299830	257215	310613	194482	309046	341553	290813	475920	328969	488502	230568	412154	476789	490241	467141	500052	480553	415604	422139	370176	430599	425586	534838	0.0276446	0.0247679	0.0541936	0.0250834	0.023965	0.0197846	0.0417217	0.0300842	0.0178324	0.0252664	0.0248642	0.0337126	0.0245604	0.0300552	0.0294958	0.0304367	0.0290577
39 L-Valine-13C-2	780962	691067	662516	612094	2724421	2651423	1230404	1076312	2550447	1581375	1476246	1081449	663073	919120	1207797	1071197	2263511	1914306	3363443	1412243	2545185	2729634	2536643	2418238	2532040	2360679	2054551	2007736	1949355	1673977	2116491	2689729	0.0954295	0.097107	0.209506	0.104433	0.135348	0.127086	0.07234	0.127895	0.128457	0.133261	0.142704	0.117376	0.083737	0.0893858	0.104303	0.112112	0.138201
40 L-Valine-13C-3	893310	696263	619073	629519	2744576	2880304	1241468	1092014	2642227	1819065	1597748	994881	719031	912756	1217152	984060	2252531	1975510	3661868	1448859	2690808	2613498	2562192	2489935	2531211	2488237	2106773	1959238	2031079	1776833	2029845	2805514	0.109158	0.0978371	0.195768	0.107406	0.136349	0.138056	0.0729905	0.12976	0.13308	0.153291	0.154449	0.10798	0.0908038	0.0887669	0.105111	0.102992	0.13753
41 L-Valine-13C-4	237732	222621	178409	177862	727832	709442	177340	151600	844907	341215	259895	115824	184058	228784	254618	181546	499394	522895	894520	332412	551796	463498	427387	395886	406604	408781	265648	297428	224497	169290	271610	344277	0.0290496	0.0312821	0.0564179	0.030346	0.0361583	0.0340043	0.0104265	0.0180141	0.042555	0.0287539	0.0251232	0.0125711	0.023244	0.0222496	0.0219883	0.0190007	0.0304909
42 L-Valine-13C-5	2377013	2084154	1530903	1435153	7071434	8385380	2261699	1679330	8515730	3129036	2315690	1300995	1657573	2446749	2401533	1887586	4064923	4590156	8365472	3455589	5510996	4159071	3946878	3856284	3882686	3884986	2598782	2528527	2193877	2083797	2591998	3480566	0.290459	0.29286	0.484114	0.244859	0.351305	0.40192	0.132974	0.199549	0.428907	0.263681	0.223851	0.141205	0.209329	0.23795	0.207391	0.197556	0.248188
43 Valine-IS-13C,15N-5,1	36514148	36355712	37602352	36056836	32978402	30115888	35400468	35275984	32211452	33757328	34298272	34759612	35111664	36758768	36653728	35603224	35192704	32324028	35286856	36789812	35424072	34978476	33571608	32841458	34282052	35264528	32607708	33913424	33720584	31778370	32742742	34552088	NA	NA	NA	NA	NA	NA	NA	NA	NA	NA	NA	NA	NA	NA	NA	NA	NA
Cell number	508500	536400	611280	695160	272200	260480	302400	276150	452750	312900	387700	210750	662400	632100	646800	689700	342000	442500	322900	461950	381300	255250	284500	282850	224300	302900	245800	308900	173738	173738	318975	308925
Extraction volume	1017	1073	1223	1390	544	521	605	552	906	626	775	422	1325	1264	1294	1379	684	885	646	924	763	511	569	566	449	606	492	618	347	347	638	618
Moles: Internal standard (Valine-IS-13C,15N-5,1)	5.085e-10	5.365e-10	6.115e-10	6.95e-10	2.72e-10	2.605e-10	3.025e-10	2.76e-10	4.53e-10	3.13e-10	3.875e-10	2.11e-10	6.625e-10	6.32e-10	6.47e-10	6.895e-10	3.42e-10	4.425e-10	3.23e-10	4.62e-10	3.815e-10	2.555e-10	2.845e-10	2.83e-10	2.245e-10	3.03e-10	2.46e-10	3.09e-10	1.735e-10	1.735e-10	3.19e-10	3.09e-10
Moles: Endogenous valine	1.13966e-10	1.05019e-10	5.14258e-11	1.12974e-10	1.66021e-10	1.80466e-10	1.4534e-10	6.5844e-11	2.7922e-10	1.10029e-10	1.16875e-10	5.59287e-11	1.49409e-10	1.76791e-10	2.04402e-10	1.85038e-10	1.59164e-10	1.96675e-10	2.19647e-10	1.36295e-10	1.89049e-10	1.28999e-10	1.39252e-10	1.37094e-10	1.11342e-10	1.39928e-10	1.03817e-10	1.22453e-10	6.81227e-11	6.84381e-11	1.36737e-10	1.60081e-10
Moles per million cells	2.24123e-10	1.95784e-10	8.41281e-11	1.62515e-10	6.09922e-10	6.9282e-10	4.80622e-10	2.38435e-10	6.1672e-10	3.51643e-10	3.01457e-10	2.65379e-10	2.25558e-10	2.79688e-10	3.1602e-10	2.68288e-10	4.65393e-10	4.44464e-10	6.80234e-10	2.95042e-10	4.95802e-10	5.05383e-10	4.89461e-10	4.84689e-10	4.96399e-10	4.61961e-10	4.22363e-10	3.96416e-10	3.921e-10	3.93916e-10	4.28677e-10	5.18189e-10
Picomoles per million cells	224.123	195.784	84.1281	162.515	609.922	692.82	480.622	238.435	616.72	351.643	301.457	265.379	225.558	279.688	316.02	268.288	465.393	444.464	680.234	295.042	495.802	505.383	489.461	484.689	496.399	461.961	422.363	396.416	392.1	393.916	428.677	518.189
[truncated: 15 more columns]
