# Supplementary material for: Resurrecting essential amino acid biosynthesis in mammalian cells
Source: eLife journal article supplement (doi:10.7554/elife.72847), 2022-09-27
Supplement: supp [file Figure 5-figure supplement 1-source data 1.xlsx]

## Sheet: A
Plated cells on 3/21/22 ~250k cells per 6 well - 6 wells of each pCtrl, pCtrl-ilvD+, pMTIV, pMTIV-ilvD+ cells
Counted 3 wells of each on 3/22/22 and switched the remainder to valine-free RPMI (F12K Ile)
Day 0 count	Count	Actual
pCtrl	294400	441600
pCtrl	279700	419550
pCtrl	361300	541950
pCtrl-ilvD+	361500	542250
pCtrl-ilvD+	395400	593100
pCtrl-ilvD+	403500	605250
pMTIV	367000	550500
pMTIV	398200	597300
pMTIV	382800	574200
pMTIV-ilvD+	367000	550500
pMTIV-ilvD+	336000	504000
pMTIV-ilvD+	360300	540450
Counted 3 of each well on 3/26/22 and replated the MTIV and MTIV-LV wells
Day 4 count	Count	Actual
pCtrl	167400	167400
pCtrl	197600	197600
pCtrl	190200	190200
pCtrl-ilvD+	190700	190700
pCtrl-ilvD+	222600	222600
pCtrl-ilvD+	202700	202700
pMTIV	111300	1113000
pMTIV	135700	1357000
pMTIV	119800	1198000
pMTIV-ilvD+	120400	1204000
pMTIV-ilvD+	145600	1456000
pMTIV-ilvD+	189200	1892000

## Sheet: B
On 4/10/22 Plated 250k of each cell line into commercial RPMI.
On 4/11/22 Counted 3 wells of each and switched remainder of wells to reconstituted RPMI							Cumulative cell number	Day 0	Day 2	Day 5	Day 8	Day 11	Day 14	Day 17	Day 20	Day 23	Day 26	Day 29
	Count	Actual					pMTIV	395700	1929400	1.51231e+07	7.38882e+07	6.6857e+08	5.13857e+09	3.33988e+10	2.50987e+11	1.96129e+12	1.08614e+13	7.45618e+13
pMTIV	216800	325200					pMTIV	395700	2024000	1.48121e+07	7.86245e+07	7.73525e+08	4.6947e+09	3.60552e+10	2.95343e+11	2.60022e+12	1.92823e+13	1.25802e+14
pMTIV	266200	399300	395700				pMTIV	395700	2.002e+06	15986000	97888000	7.72098e+08	5.2652e+09	5.0948e+10	3.83905e+11	3.02156e+12	1.77041e+13	1.06713e+14
pMTIV	308400	462600					pMTIV-ilvD+	556100	2520000	2.0162e+07	1.11955e+08	9.9971e+08	6.76226e+09	5.41546e+10	3.89307e+11	3.17979e+12	2.15724e+13	1.47613e+14
pMTIV-ilvD+	335000	502500					pMTIV-ilvD+	556100	2536000	2.29646e+07	1.21588e+08	1.05711e+09	8.0368e+09	6.01235e+10	4.01129e+11	3.2942e+12	2.35356e+13	1.62099e+14
pMTIV-ilvD+	375800	563700	556100				pMTIV-ilvD+	556100	2444000	2.42098e+07	1.21637e+08	1.23279e+09	9.14203e+09	7.44267e+10	5.30295e+11	4.23602e+12	2.61109e+13	2.12847e+14
pMTIV-ilvD+	401400	602100
							PDL	Day 0	Day 2	Day 5	Day 8	Day 11	Day 14	Day 17	Day 20	Day 23	Day 26	Day 29
On 4/13/22 counted each well and plated 200k per well into reconstituted complete RPMI							pMTIV	0	2.28572	5.25631	7.54496	10.7227	13.665	16.3654	19.2752	22.2414	24.7108	27.49
	Count	Actual	Replated (volume)	Replated (cells)			pMTIV	0	2.35478	5.22634	7.63459	10.9331	13.5346	16.4758	19.51	22.6482	25.5388	28.2447
pMTIV	96470	1929400	0.104	200658			pMTIV	0	2.33901	5.33637	7.95075	10.9304	13.7001	16.9746	19.8883	22.8649	25.4157	28.0073
pMTIV	101200	2024000	0.099	200376			pMTIV-ilvD+	0	2.18005	5.18026	7.65352	10.8122	13.5702	16.5717	19.4176	22.4476	25.2098	27.9844
pMTIV	100100	2.002e+06	0.1	200200			pMTIV-ilvD+	0	2.18919	5.36804	7.77261	10.8927	13.8193	16.7226	19.4607	22.4986	25.3355	28.1195
pMTIV-ilvD+	126000	2520000	0.079	199080			pMTIV-ilvD+	0	2.13587	5.44422	7.77319	11.1145	14.0052	17.0305	19.8634	22.8614	25.4853	28.5124
pMTIV-ilvD+	126800	2536000	0.079	200344
pMTIV-ilvD+	122200	2444000	0.082	200408
On 4/16/22 counted each well and plated 200k per well into reconstituted complete RPMI
	Count	Actual	Replated (volume)	Replated (cells)
pMTIV	78640	1572800	0.128	201318
pMTIV	73320	1466400	0.136	199430
pMTIV	79930	1598600	0.125	199825
pMTIV-ilvD+	79640	1592800	0.126	200693
pMTIV-ilvD+	90710	1814200	0.11	199562
pMTIV-ilvD+	99260	1985200	0.101	200505
On 4/19/22 counted each well and plated 200k per well into reconstituted complete RPMI
	Count	Actual	Replated (volume)	Replated (cells)
pMTIV	49180	983600	0.204	200654
pMTIV	52930	1058600	0.19	201134
pMTIV	61180	1223600	0.164	200670
pMTIV-ilvD+	55720	1114400	0.18	200592
pMTIV-ilvD+	52830	1056600	0.19	200754
pMTIV-ilvD+	50370	1007400	0.2	201480
On 4/22/22 counted each well and plated 200k per well into reconstituted complete RPMI
	Count	Actual	Replated (volume)	Replated (cells)
pMTIV	90780	1815600	0.11	199716
pMTIV	98940	1978800	0.102	201838
pMTIV	79140	1582800	0.126	199433
pMTIV-ilvD+	89560	1791200	0.112	200614
pMTIV-ilvD+	87270	1745400	0.115	200721
pMTIV-ilvD+	102100	2.042e+06	0.098	200116
On 4/25/22 counted each well and plated 200k per well into reconstituted complete RPMI
	Count	Actual	Replated (volume)	Replated (cells)
pMTIV	153500	1535000	0.13	199550
pMTIV	122500	1.225e+06	0.163	199675
pMTIV	136000	1360000	0.147	199920
pMTIV-ilvD+	135700	1357000	0.147	199479
pMTIV-ilvD+	152600	1526000	0.131	199906
pMTIV-ilvD+	148400	1484000	0.135	200340
On 4/28/22 counted each well and plated 200k per well into reconstituted complete RPMI
	Count	Actual	Replated (volume)	Replated (cells)
pMTIV	259400	1297000	0.154	199738
pMTIV	306700	1533500	0.13	199355
pMTIV	386900	1934500	0.104	201188
pMTIV-ilvD+	319500	1597500	0.126	201285
pMTIV-ilvD+	299100	1495500	0.134	200397
pMTIV-ilvD+	326200	1631000	0.124	202244
On 5/1/22 counted each well and plated 200k per well into reconstituted complete RPMI
	Count	Actual	Replated (volume)	Replated (cells)
pMTIV	150100	1501000	0.133	199633
pMTIV	163300	1633000	0.122	199226
pMTIV	151600	1516000	0.132	200112
pMTIV-ilvD+	144700	1447000	0.138	199686
pMTIV-ilvD+	133700	1337000	0.149	199213
pMTIV-ilvD+	144100	1441000	0.139	200299
On 5/4/22 counted each well and plated 200k per well into reconstituted complete RPMI
	Count	Actual	Replated (volume)	Replated (cells)
pMTIV	156000	1560000	0.128	199680
pMTIV	175400	1754000	0.114	199956
pMTIV	157500	1575000	0.127	200025
pMTIV-ilvD+	163100	1631000	0.123	200613
pMTIV-ilvD+	163600	1636000	0.122	199592
pMTIV-ilvD+	160000	1600000	0.125	200000
On 5/7/22 counted each well and plated 200k per well into reconstituted complete RPMI
	Count	Actual	Replated (volume)	Replated (cells)
pMTIV	55290	1105800	0.181	200150
pMTIV	74140	1482800	0.135	200178
pMTIV	58600	1172000	0.171	200412
pMTIV-ilvD+	68050	1361000	0.147	200067
pMTIV-ilvD+	71300	1426000	0.14	199640
pMTIV-ilvD+	61640	1232800	0.162	199714
On 5/10/22 counted each well and plated 200k per well into reconstituted complete RPMI
	Count	Actual	Replated (volume)	Replated (cells)
pMTIV	137400	1374000	ended	ended
pMTIV	130600	1306000	ended	ended
pMTIV	120800	1208000	ended	ended
pMTIV-ilvD+	136900	1369000	ended	ended
pMTIV-ilvD+	137500	1375000	ended	ended
pMTIV-ilvD+	162800	1628000	ended	ended
