# Supplementary material for: Resurrecting essential amino acid biosynthesis in mammalian cells
Source: eLife journal article supplement (doi:10.7554/elife.72847), 2022-09-27
Supplement: supp [file Figure 5-source data 1.xlsx]

## Sheet: Sheet1
Plated 250k of each indicated cell type on 4/3/22. Counted 3 wells of each cell type on day 0 (4/4/22) and switched remainder of wells to valine-free RPMI (0.06mM Ile) + 2mM sodium pyruvate.
	Count	Actual
pMTIV	60990	609900							Cumulative cell number	Day 0	Day 4	Day 7	Day 11	Day 15	Day 19	Day 23	Day 29	Day 33	Day 36	Day 38	Day 39
pMTIV	49060	490600							pMTIV	553233	1647000	2.41947e+06	4.70755e+06		1.24176e+07		5.24464e+06			878192
pMTIV	55920	559200							pMTIV	553233	1461000	2.33586e+06	3.69128e+06		8.79509e+06		2.48748e+06			465105
pMTIV-ilvD+	61760	617600							pMTIV	553233	1871000	2.40597e+06	4.16224e+06		1.2385e+07		6.49127e+06			1.40826e+06
pMTIV-ilvD+	64560	645600							pMTIV-ilvD+	609633	3048000	5.27378e+06	1.68633e+07	4.10647e+07	1.06721e+08	2.47811e+08	4.80136e+08	1.06336e+09	1.99209e+09		2.81897e+09
pMTIV-ilvD+	56570	565700							pMTIV-ilvD+	609633	2943000	5.54529e+06	1.54965e+07	4.09272e+07	1.13986e+08	2.79195e+08	5.36548e+08	1.37183e+09	1.96867e+09		2.21279e+09
									pMTIV-ilvD+	609633	2928000	6.06433e+06	1.70028e+07	4.5776e+07	1.44125e+08	3.1107e+08	7.71611e+08	1.88387e+09	3.36456e+09		4.24397e+09
Counted cells on day 4 and replated 1 mil of each. Counts were 50ul in 500ul total.
	Count	Actual	Replated (volume)	Replated (cells)					PDL	Day 0	Day 4	Day 7	Day 11	Day 15	Day 19	Day 23	Day 29	Day 33	Day 36	Day 38	Day 39
pMTIV	164700	1647000	0.606	998082					pMTIV	0	1.57391	2.12878	3.08908		4.48845		3.24495			0.666663
pMTIV	146100	1461000	0.686	1.00225e+06					pMTIV	0	1.40103	2.07804	2.73822		3.99083		2.16877			-0.250338
pMTIV	187100	1871000	0.536	1.00286e+06					pMTIV	0	1.75789	2.1207	2.91146		4.48466		3.55262			1.34798
pMTIV-ilvD+	304800	3048000	0.328	999744					pMTIV-ilvD+	0	2.3219	3.11289	4.7899	6.07394	7.45184	8.66727	9.62149	10.7686	11.6743		12.1752
pMTIV-ilvD+	294300	2943000	0.34	1.00062e+06					pMTIV-ilvD+	0	2.27132	3.18532	4.66796	6.06911	7.54686	8.83931	9.78176	11.1361	11.6572		11.8259
pMTIV-ilvD+	292800	2928000	0.342	1.00138e+06					pMTIV-ilvD+	0	2.26395	3.31441	4.80179	6.23064	7.88534	8.99528	10.3059	11.5937	12.4305		12.7655
Counted cells on day 7 and replated 1 mil of each. Counts were 50ul in 1000ul total.
	Count	Actual	Replated (volume)	Replated (cells)
pMTIV	73310	1466200	0.72	1.00288e+06
pMTIV	80120	1602400	0.658	1.00166e+06
pMTIV	64480	1.2896e+06	0.814	997248
pMTIV-ilvD+	86490	1.7298e+06	0.61	1.00242e+06
pMTIV-ilvD+	94270	1885400	0.558	999451
pMTIV-ilvD+	103700	2.074e+06	0.508	1.00091e+06
Counted cells on day 11 (4/15/22) and replated 1mil of each. Counts were 50ul in 1000ul total.
	Count	Actual	Replated (volume)	Replated (cells)
pMTIV	102700	2.054e+06	0.488	1.00235e+06
pMTIV	83310	1666200	0.6	999720
pMTIV	90800	1816000	0.55	998800
pMTIV-ilvD+	168700	3374000	0.296	998704
pMTIV-ilvD+	147000	2940000	0.34	999600
pMTIV-ilvD+	147700	2954000	0.34	1.00436e+06
Counted pMTIV-ilvD+ cells on day 15 (4/15/22) and replated 1mil of each. Counts were 50ul in 1000ul total.
	Count	Actual	Replated (volume)	Replated (cells)
pMTIV-ilvD+	121600	2432000	0.412	1001984
pMTIV-ilvD+	132000	2640000	0.38	1003200
pMTIV-ilvD+	135200	2704000	0.37	1000480
Counted cells on day 19 (4/23/22) and replated 1mil of each. Counts were 50ul in 1000ul total.
	Count	Actual	Replated (volume)	Replated (cells)
pMTIV	132200	2644000	0.38	1004720
pMTIV	119100	2382000	0.42	1000440
pMTIV	148600	2972000	0.338	1.00454e+06
pMTIV-ilvD+	130200	2604000	0.386	1005144
pMTIV-ilvD+	139700	2794000	0.358	1000252
pMTIV-ilvD+	157500	3150000	0.318	1001700
Counted cells on day 23 (4/27/22) and replated 1mil of each. Counts were 50ul in 1000ul total.
	Count	Actual	Replated (volume)	Replated (cells)
pMTIV-ilvD+	116700	2334000	0.429	1001286
pMTIV-ilvD+	122500	2.45e+06	0.408	999600
pMTIV-ilvD+	108100	2162000	0.463	1001006
Counted cells on day 29 (5/3/22) and replated 1mil of each. Resuspended pMTIV cells in 500 and pMTIV-ilvD+ cells in 1000ul. Counts were 50ul in 500ultotal.
	Count	Actual	Replated (volume)	Replated (cells)
pMTIV	84870	424350	0.45	381915	24 well
pMTIV	56590	282950	0.45	254655	24 well
pMTIV	105300	526500	0.45	473850	24 well
pMTIV-ilvD+	194000	1940000	0.516	1001040
pMTIV-ilvD+	192100	1921000	0.52	998920
pMTIV-ilvD+	248300	2483000	0.402	998166
Counted pMTIV-ilvD+ cells on day 33 (5/7/22) and replated 1 mil. Resuspended cells in 1mil and counted 50ul in 500ul total.
	Count	Actual	Replated (volume)	Replated (cells)
pMTIV-ilvD+	221700	2217000	0.45	997650
pMTIV-ilvD+	255400	2.554e+06	0.392	1.00117e+06
pMTIV-ilvD+	243700	2.437e+06	0.41	999170
Counted pMTIV-ilvD+ cells on day 36 (5/10/22) and replated 1 mil. Resuspended cells in 1mil and counted 20ul in 500ul total.
	Count	Actual	Replated (volume)	Replated (cells)
pMTIV-ilvD+	74760	1869000	0.535	999915
pMTIV-ilvD+	57470	1436750	0.694	997104
pMTIV-ilvD+	71380	1784500	0.562	1.00289e+06
On day 38 5/12/22 counted each pMTIV well (50ul out of 500ul total counted in 500ul total).
	Count	Actual	Replated (volume)	Replated (cells)
pMTIV	12790	63950	ended	-
pMTIV	9523	47615	ended	-
pMTIV	20560	102800	ended	-
Counted pMTIV-ilvD+ cells on day 39 (5/13/22) and replated 1 mil. Resuspended cells in 1mil and counted 20ul in 500ul total.
	Count	Actual	Collected for metabolomiccs	Replated (cells)
pMTIV-ilvD+	40800	1020000	510000	-
pMTIV-ilvD+	47520	1188000	594000	-
pMTIV-ilvD+	44230	1105750	552875	-
