# Supplementary material for: Resurrecting essential amino acid biosynthesis in mammalian cells
Source: eLife. 2022 Sep 27;11:e72847. doi: 10.7554/eLife.72847 (PMC9560156; doi:10.7554/eLife.72847)
Supplement: Supplementary file 1. [file elife-72847-supp1.xlsx]

## Sheet: Sheet1
Supplemental file 1. Minimal prototrophic pathways set for AA prototrophy in mammalian cells
	Compound
	EC reactions	Proposed genes
AA: Histitine	Histidine (from PRPP)
	2.4.2.17	Sc HIS1
	3.6.1.31	Sc HIS4
	3.5.4.19	Sc HIS4
	5.3.1.16	Sc HIS6
	4.3.2.10	Sc HIS7
	4.2.1.19	Sc HIS3
	2.6.1.9	Sc HIS5
	3.1.3.15	Sc HIS2
	1.1.1.23	Sc HIS4
Enzymatic steps:	9
Genes:		7
Tryptophan	Chorismate (from E4P)		Tryptophan (from chorismate)
	2.5.1.54	Sc ARO3	4.1.3.27	Sc TRP2/3
	4.2.3.4	Sc ARO1	2.4.2.18	Sc TRP4
	4.2.1.10	Sc ARO1	5.3.1.24	Sc TRP1
	1.1.1.25	Sc ARO1	4.1.1.48	Sc TRP3
	2.7.1.71	Sc ARO1	4.2.1.20	Sc TRP5
	2.5.1.19	Sc ARO1
	4.2.3.5	Sc ARO2
	7		5
		3		5
Phenylalanine	Phenylalanine (from chorismate)
	5.4.99.5	Ec pheA
	4.2.1.51	Ec pheA
	2.6.1.57	Ec tyrB
	3
		2
Threonine	L-aspartate 4-semialdehyde (from aspartate)		Homoserine (from L-aspartate 4-semialdehyde)		Threonine (from homoserine)
	2.7.2.4	Ec metL	1.1.1.3	Ec metL (redundant)	2.7.1.39	Ec thrB
	1.2.1.11	Ec asd			4.2.3.1	Ec thrC
	2		1		2
		2		0		2
Methionine	Hydrogen sulfide (inorganic fixation)		Methionine (from hydrogen sulfide and homoserine)
	2.7.7.4	Sc MET3	2.3.1.31	Sc MET2
	2.7.1.25	Sc MET14	2.5.1.49	Sc MET17
	1.8.4.8	Sc MET16	2.3.1.14	native
	1.8.1.2	Sc MET5/10
	4		3
		5		2
Lysine	Lysine (from L-aspartate 4-semialdehyde)
	4.3.3.7	Cg dapA
	1.17.1.8	Cg dapB
	1.4.1.16	Cg ddh
	4.1.1.20	Cg lysA
	4
		4
Valine	2-oxoisovalerate (from pyruvate)		Valine (from 2-oxoisovalerate)
	2.2.1.6	Ec ilvB/N	2.6.1.42	native
	1.1.1.86	Ec ilvC
	4.2.1.9	Ec ilvD
	3		1
		4		0
Leucine	Leucine (from 2-oxoisovalerate)
	2.3.3.13	Ec leuA
	4.2.1.33	Ec leuC/D
	1.1.1.85	Ec leuB
	2.6.1.42	native
	3
		4
Isoleucine	Isoleucine (from threonine)
	4.3.1.19	native
	2.2.1.6	Ec ilvB/N (redundant)
	1.1.1.86	Ec ilvC (redundant)
	4.2.1.9	Ec ilvD (redundant)
	2.6.1.42	native	Total
	5		32	Enzymatic steps
		0	38	Genes
	Ec: Eschericia coli
	Sc: Saccharomyces cerevisiae
	Cg: Corynebacterium glutamicum
