# Supplementary material for: Resurrecting essential amino acid biosynthesis in mammalian cells
Source: eLife. 2022 Sep 27;11:e72847. doi: 10.7554/eLife.72847 (PMC9560156; doi:10.7554/eLife.72847)
Supplement: Supplementary file 3. [file elife-72847-supp3.xlsx]

## Sheet: Sheet2
Supplementary file 3. Codon-optimized nucleotide sequence for each gene listed in Supplementary file 1.
Amino Acid	Gene	Human codon optimized nucleic acid sequence
Histidine	Sc HIS1	ATGGACCTCGTCAACCATCTCACAGACCGATTGTTGTTTGCAATCCCAAAGAAGGGACGCCTCTATAGCAAATCTGTCAGTATACTGAACGGAGCTGACATTACGTTTCACCGCAGTCAGCGACTCGATATCGCGTTGTCAACGAGCTTGCCGGTCGCGCTTGTATTCCTGCCAGCAGCGGATATTCCTACCTTCGTGGGGGAGGGTAAGTGCGATCTCGGCATAACCGGCGTGGATCAGGTTCGAGAATCCAACGTAGATGTGGATTTGGCGATTGACCTTCAATTCGGCAACTGTAAACTTCAGGTGCAAGTCCCTGTGAATGGCGAATACAAGAAACCAGAGCAATTGATAGGTAAAACTATCGTTACCTCTTTTGTTAAGCTCGCTGAAAAATAC…
	Sc HIS4	ATGGTGCTTCCAATCCTTCCGCTCATCGATGACCTTGCTAGCTGGAACAGCAAGAAGGAATATGTTTCTCTTGTAGGGCAAGTACTGTTGGATGGTAGCTCCCTGTCAAATGAGGAAATATTGCAATTCTCCAAGGAGGAAGAGGTGCCACTTGTGGCGCTCTCACTCCCAAGCGGGAAGTTTAGCGACGATGAAATTATAGCGTTCCTGAACAATGGGGTTTCCTCACTCTTCATTGCTAGCCAAGATGCAAAAACGGCGGAACATTTGGTGGAACAGCTCAATGTCCCGAAAGAGCGCGTTGTTGTGGAAGAGAATGGAGTCTTCAGTAATCAGTTCATGGTCAAGCAGAAATTTAGTCAAGACAAGATTGTGTCTATTAAGAAACTTAGCAAAGAT…
	Sc HIS6	ATGACAAAATTTATAGGATGTATCGACCTTCACAACGGTGAAGTTAAACAGATCGTCGGCGGAACGTTGACCTCCAAGAAGGAAGATGTTCCAAAGACGAATTTCGTCTCACAGCATCCTTCATCCTACTATGCGAAATTGTATAAGGATCGAGACGTACAGGGATGCCATGTTATCAAGCTTGGTCCCAATAACGACGACGCTGCTAGGGAGGCATTGCAAGAGAGTCCACAGTTCCTCCAAGTTGGGGGAGGGATTAACGACACCAACTGTCTGGAGTGGCTCAAATGGGCTTCCAAAGTCATTGTCACCTCCTGGCTTTTTACGAAGGAAGGACACTTTCAGCTCAAGCGACTCGAAAGACTGACCGAGTTGTGCGGGAAAGATCGCATAGTCGTA…
	Sc HIS7	ATGCCCGTCGTGCACGTTATCGATGTTGAATCCGGGAATCTTCAAAGTCTTACTAACGCTATCGAGCATCTCGGATACGAGGTCCAGCTCGTGAAGTCCCCTAAGGACTTCAATATTTCTGGAACCAGTAGGTTGATTTTGCCTGGAGTGGGTAACTACGGTCATTTCGTTGATAATCTGTTCAATAGGGGCTTTGAAAAGCCTATTCGGGAATACATTGAAAGTGGCAAGCCTATAATGGGGATATGTGTCGGACTTCAAGCTTTGTTCGCTGGGAGTGTCGAATCTCCGAAATCAACTGGCCTGAACTACATTGATTTCAAACTGTCTCGATTCGATGATTCCGAAAAGCCCGTACCGGAGATCGGTTGGAATAGCTGTATCCCGTCTGAGAATTTG…
	Sc HIS3	ATGACCGAGCAAAAGGCACTCGTGAAACGGATTACTAATGAAACCAAGATCCAAATCGCTATCAGTCTTAAAGGGGGCCCGCTGGCGATCGAGCACTCTATTTTTCCAGAGAAAGAGGCAGAAGCTGTAGCAGAACAGGCCACTCAGAGCCAAGTAATAAATGTCCACACCGGGATCGGCTTTCTGGACCATATGATCCACGCGCTGGCAAAACACTCAGGATGGTCACTGATTGTGGAGTGCATCGGGGATCTCCACATTGACGACCATCACACGACGGAAGATTGTGGCATCGCTCTCGGCCAGGCATTTAAGGAAGCCCTCGGAGCGGTACGCGGAGTTAAGCGGTTCGGGTCCGGCTTCGCACCGCTGGACGAAGCCCTTTCACGAGCAGTGGTG…
	Sc HIS5	ATGGTTTTTGACTTGAAGAGGATCGTTCGGCCTAAAATATACAATTTGGAACCTTACCGATGCGCTCGGGACGACTTCACCGAAGGGATCCTTCTGGATGCAAACGAAAATGCCCATGGTCCTACTCCTGTAGAGCTCTCCAAGACCAATTTGCACAGATATCCCGATCCCCATCAACTCGAGTTCAAAACCGCAATGACCAAGTATAGAAATAAGACTTCCTCTTATGCCAACGACCCCGAAGTTAAACCGCTTACAGCCGACAACCTCTGCCTCGGGGTGGGAAGTGATGAGTCTATAGACGCCATTATCAGGGCCTGTTGTGTGCCTGGTAAAGAGAAAATTTTGGTACTTCCTCCCACCTACTCAATGTATTCCGTTTGCGCGAACATAAATGAC…
	Sc HIS2	ATGCATTCCCATCACAGTCACTCAGGCGACTATTCCGCACATGGCACTGATCCGCTCGACTCAGTCGTGGACCAAGTCGTCAACCTGAATTTTCACACTTACTGCCTCACGGAACATATCCCAAGGATTGAAGCGAAATTCATATACCCGGAGGAACAATCATTGGGAAAAAACCCGGAAGAAGTAATTACCAAACTTGAAACAAGCTTTAAAAATTTCATGAGTCACGCGCAGGAGATTAAGACGCGATACGCGGACAGGCCCGATGTGCGCACGAAATTCATAATTGGTATGGAGATAGAAAGTTGTGATATGGCTCACATAGAATACGCTAAACGGTTGATGAAAGAGAACAACGACATTTTGAAATTCTGCGTAGGCAGTGTCCACCATGTTAAT…
Tryoptophan	Sc ARO3	ATGTTTATAAAAAATGACCACGCTGGGGATCGCAAACGGCTTGAGGATTGGCGCATTAAAGGGTATGATCCTCTGACTCCCCCAGACCTGCTGCAACATGAATTCCCGATTTCAGCGAAAGGAGAGGAAAACATAATTAAGGCCCGCGATAGTGTTTGTGACATACTGAATGGAAAAGACGACAGGCTCGTTATAGTGATAGGGCCGTGTTCTCTGCATGATCCCAAGGCGGCATATGATTATGCCGATAGACTGGCTAAAATAAGTGAAAAACTTAGTAAAGATCTGCTTATTATTATGCGCGCTTACCTGGAAAAACCGAGAACCACAGTGGGATGGAAGGGGCTGATTAACGACCCAGACATGAATAATTCATTTCAGATAAACAAAGGATTGAGA…
	Sc ARO1	ATGGTACAATTGGCAAAGGTTCCAATATTGGGAAACGATATAATACATGTAGGCTATAACATTCATGACCATCTGGTCGAAACTATTATTAAGCATTGTCCAAGTAGTACCTATGTTATTTGTAATGATACAAATCTGTCAAAGGTGCCTTATTATCAGCAACTCGTATTGGAGTTCAAGGCTAGTCTGCCCGAAGGGTCTAGGCTTCTGACATACGTTGTCAAGCCGGGTGAAACCAGCAAAAGTCGCGAGACGAAGGCTCAACTGGAGGACTATCTCCTCGTGGAAGGGTGTACGAGAGATACAGTCATGGTAGCAATAGGTGGAGGGGTAATAGGCGACATGATTGGATTCGTCGCTTCCACATTCATGCGCGGGGTACGGGTGGTGCAGGTGCCC…
	Sc ARO2	ATGTCAACGTTTGGTAAGTTGTTCCGAGTCACCACTTATGGGGAGTCCCATTGCAAGTCTGTCGGGTGTATTGTTGATGGTGTACCACCGGGAATGAGCCTTACGGAGGCGGATATTCAGCCTCAGCTCACCCGCCGCAGGCCAGGCCAAAGCAAGCTGTCCACTCCGCGCGACGAAAAAGACCGCGTTGAGATACAGTCTGGGACGGAGTTCGGGAAAACGCTGGGAACACCGATTGCGATGATGATAAAAAATGAGGATCAAAGGCCGCACGATTATTCTGACATGGATAAGTTCCCTAGACCGTCACATGCTGACTTCACCTACTCTGAAAAATATGGTATTAAGGCGAGTTCCGGGGGTGGTCGGGCGAGTGCGCGAGAGACGATTGGGCGAGTT…
	Sc TRP2	ATGACTGCCTCTATTAAAATTCAACCCGATATAGATAGTCTCAAACAATTGCAGCAGCAAAATGACGACAGCTCAATCAATATGTACCCTGTTTACGCGTATCTGCCATCCCTTGATCTTACTCCTCACGTCGCTTACCTCAAATTGGCCCAACTCAATAACCCGGACCGCAAGGAATCCTTCCTCCTCGAAAGCGCAAAAACCAACAATGAATTGGACCGGTACTCTTTTATTGGGATTAGTCCGCGGAAGACTATCAAAACGGGTCCCACGGAGGGCATCGAAACCGATCCACTCGAAATTCTGGAAAAAGAAATGAGTACATTTAAGGTGGCCGAGAACGTTCCCGGTCTGCCCAAACTGAGCGGCGGTGCCATTGGGTACATTAGCTACGACTGC…
	Sc TRP3	ATGTCAGTTCACGCGGCAACAAACCCTATTAATAAACACGTAGTACTCATTGATAACTATGATTCTTTCACTTGGAATGTGTACGAGTATCTCTGTCAGGAAGGCGCAAAAGTGAGCGTTTATCGCAACGACGCCATTACCGTGCCTGAAATTGCAGCCCTCAATCCTGACACGCTTCTTATTAGCCCTGGTCCTGGGCATCCGAAAACCGATTCCGGTATTAGTAGGGACTGTATTCGCTATTTTACTGGAAAGATTCCGGTTTTTGGGATCTGTATGGGCCAGCAATGCATGTTCGACGTATTCGGCGGAGAAGTGGCATACGCTGGTGAGATTGTCCACGGCAAAACAAGTCCAATTTCACACGACAACTGTGGTATCTTTAAGAACGTACCTCAA…
	Sc TRP4	ATGAGCGAAGCGACGCTCTTGTCCTACACGAAGAAATTGCTGGCATCACCCCCCCAACTCAGTAGCACGGATTTGCATGACGCGCTGTTGGTCATTTTGAGTCTCTTGCAGAAGTGTGATACGAACAGTGATGAATCCCTCAGTATCTATACCAAGGTTTCTTCTTTCCTCACGGCCCTCAGAGTAACCAAGTTGGATCACAAAGCGGAGTACATAGCAGAAGCAGCTAAGGCGGTACTCAGGCACTCTGATTTGGTAGATCTGCCTCTGCCTAAGAAGGACGAACTGCACCCTGAGGACGGTCCAGTGATCCTGGATATAGTAGGTACCGGCGGAGATGGTCAAAATACATTTAATGTTAGTACAAGCGCGGCAATCGTCGCTAGCGGGATCCAAGGA…
	Sc TRP1	ATGTCAGTAATTAACTTTACCGGCTCCAGTGGACCACTCGTAAAAGTATGTGGCCTGCAAAGCACGGAGGCCGCAGAGTGCGCGTTGGATAGCGATGCTGATCTTCTCGGTATTATATGCGTCCCGAATAGGAAACGCACAATAGACCCGGTTATAGCCAGGAAAATCTCTTCACTTGTAAAAGCCTATAAGAATTCCTCCGGGACCCCAAAGTACCTGGTGGGGGTGTTCCGAAACCAGCCCAAGGAAGATGTCCTCGCGCTGGTGAATGATTACGGTATCGACATCGTCCAGCTCCACGGAGATGAATCATGGCAGGAATACCAAGAGTTTTTGGGCTTGCCGGTGATTAAACGACTCGTTTTCCCTAAGGATTGCAACATCTTGCTCAGTGCCGCT…
	Sc TRP5	ATGTCCGAGCAACTGAGACAGACTTTTGCGAACGCAAAAAAGGAAAATCGGAACGCGCTCGTGACTTTCATGACCGCCGGATACCCAACTGTAAAGGATACCGTACCCATACTCAAGGGATTTCAGGACGGGGGGGTCGACATTATAGAACTGGGTATGCCTTTTTCCGATCCGATTGCCGATGGCCCCACAATCCAGTTGTCAAATACGGTAGCCCTTCAGAATGGGGTTACTTTGCCGCAAACGTTGGAAATGGTATCCCAAGCCCGGAACGAAGGTGTAACTGTACCTATAATTTTGATGGGGTATTATAATCCCATCTTGAATTACGGGGAGGAGCGCTTCATCCAGGACGCGGCCAAAGCGGGGGCCAATGGCTTCATCATAGTTGACCTTCCC…
Phenylalanine	Sc ARO3	ATGTTTATAAAAAATGACCACGCTGGGGATCGCAAACGGCTTGAGGATTGGCGCATTAAAGGGTATGATCCTCTGACTCCCCCAGACCTGCTGCAACATGAATTCCCGATTTCAGCGAAAGGAGAGGAAAACATAATTAAGGCCCGCGATAGTGTTTGTGACATACTGAATGGAAAAGACGACAGGCTCGTTATAGTGATAGGGCCGTGTTCTCTGCATGATCCCAAGGCGGCATATGATTATGCCGATAGACTGGCTAAAATAAGTGAAAAACTTAGTAAAGATCTGCTTATTATTATGCGCGCTTACCTGGAAAAACCGAGAACCACAGTGGGATGGAAGGGGCTGATTAACGACCCAGACATGAATAATTCATTTCAGATAAACAAAGGATTGAGA…
	Sc ARO1	ATGGTACAATTGGCAAAGGTTCCAATATTGGGAAACGATATAATACATGTAGGCTATAACATTCATGACCATCTGGTCGAAACTATTATTAAGCATTGTCCAAGTAGTACCTATGTTATTTGTAATGATACAAATCTGTCAAAGGTGCCTTATTATCAGCAACTCGTATTGGAGTTCAAGGCTAGTCTGCCCGAAGGGTCTAGGCTTCTGACATACGTTGTCAAGCCGGGTGAAACCAGCAAAAGTCGCGAGACGAAGGCTCAACTGGAGGACTATCTCCTCGTGGAAGGGTGTACGAGAGATACAGTCATGGTAGCAATAGGTGGAGGGGTAATAGGCGACATGATTGGATTCGTCGCTTCCACATTCATGCGCGGGGTACGGGTGGTGCAGGTGCCC…
	Sc ARO2	ATGTCAACGTTTGGTAAGTTGTTCCGAGTCACCACTTATGGGGAGTCCCATTGCAAGTCTGTCGGGTGTATTGTTGATGGTGTACCACCGGGAATGAGCCTTACGGAGGCGGATATTCAGCCTCAGCTCACCCGCCGCAGGCCAGGCCAAAGCAAGCTGTCCACTCCGCGCGACGAAAAAGACCGCGTTGAGATACAGTCTGGGACGGAGTTCGGGAAAACGCTGGGAACACCGATTGCGATGATGATAAAAAATGAGGATCAAAGGCCGCACGATTATTCTGACATGGATAAGTTCCCTAGACCGTCACATGCTGACTTCACCTACTCTGAAAAATATGGTATTAAGGCGAGTTCCGGGGGTGGTCGGGCGAGTGCGCGAGAGACGATTGGGCGAGTT…
	Ec pheA	ATGACCAGCGAAAACCCACTGCTTGCTTTGAGAGAAAAGATTTCAGCTCTGGACGAGAAGTTGTTGGCTCTGCTCGCTGAAAGACGAGAATTGGCCGTCGAAGTCGGTAAAGCTAAGTTGCTTAGCCACAGGCCCGTCCGAGACATAGACCGGGAGCGCGATCTCCTGGAACGACTCATAACCCTTGGTAAAGCCCATCACTTGGACGCACATTATATTACGCGGTTGTTTCAACTTATCATTGAGGACTCAGTACTCACTCAACAGGCTCTTTTGCAGCAACATCTTAACAAGATCAACCCCCACAGTGCCAGGATAGCATTTCTGGGGCCTAAAGGCTCCTACTCACACCTGGCGGCGAGGCAGTACGCGGCAAGGCATTTTGAGCAATTCATTGAA…
	Ec tyrB	ATGGTTGCGGAGTTGACAGCTCTTCGGGATCAAATCGATGAAGTTGACAAAGCCTTGTTGAATCTTCTTGCTAAGAGGCTCGAATTGGTCGCGGAAGTTGGGGAAGTAAAAAGCCGCTTCGGACTGCCCATATATGTACCTGAACGCGAGGCAAGCATGCTGGCTTCTCGCCGGGCTGAGGCGGAAGCCCTCGGCGTCCCACCTGATCTTATTGAAGACGTGCTGCGACGCGTGATGAGAGAATCTTACTCATCTGAAAACGACAAGGGATTCAAGACGCTCTGCCCGAGTCTTCGCCCAGTCGTGATCGTAGGTGGCGGGGGCCAAATGGGTCGCCTGTTCGAGAAGATGTTGACTCTCAGCGGCTACCAAGTTAGAATACTGGAACAGCATGATTGG…
Threonine	Ec metL	ATGTCAGTAATAGCCCAAGCCGGCGCGAAAGGTAGGCAACTTCACAAGTTCGGGGGGTCCTCTCTCGCGGATGTAAAGTGTTACCTGCGGGTTGCTGGTATCATGGCCGAATATTCACAGCCCGATGATATGATGGTTGTTAGTGCTGCCGGATCAACAACAAACCAGCTTATCAATTGGTTGAAACTGTCCCAAACAGACCGACTCTCCGCTCATCAAGTCCAGCAAACTCTTAGGAGGTACCAGTGTGATCTGATAAGTGGGCTGCTCCCCGCTGAAGAAGCAGATAGTCTCATAAGTGCTTTTGTCTCCGATCTTGAAAGACTGGCTGCTCTTCTGGATTCTGGGATTAACGACGCGGTTTATGCGGAGGTGGTGGGTCACGGGGAAGTATGGAGC…
	Ec asd	ATGAAAAATGTGGGATTCATTGGCTGGAGGGGCATGGTCGGCTCTGTACTTATGCAACGGATGGTGGAGGAGAGGGACTTTGATGCGATCCGACCCGTATTCTTTTCAACGAGTCAACTCGGACAAGCAGCTCCGTCTTTCGGTGGAACTACTGGTACTCTTCAGGATGCATTCGATCTTGAAGCACTGAAGGCTCTTGACATCATCGTAACCTGTCAGGGAGGCGACTACACTAATGAAATTTATCCTAAGCTCCGAGAGAGCGGTTGGCAAGGATACTGGATTGATGCAGCAAGTAGTCTCCGAATGAAGGACGATGCGATTATAATCCTGGACCCGGTGAATCAGGACGTAATAACTGACGGCCTCAACAATGGGATAAGGACGTTCGTTGGTGGG…
	Ec thrB	ATGGTCAAGGTTTATGCACCGGCCTCCTCAGCAAATATGAGTGTGGGTTTCGACGTCCTCGGGGCTGCTGTCACGCCAGTGGACGGTGCTCTGTTGGGTGATGTTGTCACTGTTGAAGCGGCGGAGACGTTTAGCCTCAATAATCTCGGGCGCTTCGCCGACAAGCTTCCCAGCGAACCTCGGGAGAACATAGTCTACCAATGCTGGGAAAGATTTTGCCAGGAGCTCGGAAAACAGATTCCGGTCGCCATGACGCTTGAGAAAAACATGCCTATTGGTTCAGGATTGGGTAGCTCCGCGTGTTCCGTCGTTGCAGCCCTTATGGCAATGAACGAACATTGCGGAAAGCCCCTGAACGACACGAGGCTGTTGGCATTGATGGGGGAGCTTGAGGGAAGA…
	Ec thrC	ATGAAACTTTACAACCTGAAGGACCATAATGAGCAGGTGTCTTTTGCCCAGGCTGTTACTCAAGGGCTCGGCAAGAATCAGGGTCTGTTTTTCCCTCACGACCTGCCCGAATTTTCATTGACTGAGATTGATGAGATGTTGAAGTTGGATTTTGTAACTAGATCTGCAAAGATACTTTCTGCATTCATCGGTGACGAAATACCACAGGAAATTCTGGAAGAAAGAGTCAGAGCAGCCTTCGCCTTCCCTGCCCCCGTTGCGAACGTAGAATCAGACGTAGGCTGTCTCGAATTGTTCCACGGCCCGACGCTTGCTTTTAAGGATTTTGGCGGACGCTTTATGGCTCAGATGCTGACTCATATAGCAGGTGATAAGCCAGTCACTATCTTGACTGCAACA…
Methionine	Ec metL	ATGTCAGTAATAGCCCAAGCCGGCGCGAAAGGTAGGCAACTTCACAAGTTCGGGGGGTCCTCTCTCGCGGATGTAAAGTGTTACCTGCGGGTTGCTGGTATCATGGCCGAATATTCACAGCCCGATGATATGATGGTTGTTAGTGCTGCCGGATCAACAACAAACCAGCTTATCAATTGGTTGAAACTGTCCCAAACAGACCGACTCTCCGCTCATCAAGTCCAGCAAACTCTTAGGAGGTACCAGTGTGATCTGATAAGTGGGCTGCTCCCCGCTGAAGAAGCAGATAGTCTCATAAGTGCTTTTGTCTCCGATCTTGAAAGACTGGCTGCTCTTCTGGATTCTGGGATTAACGACGCGGTTTATGCGGAGGTGGTGGGTCACGGGGAAGTATGGAGC…
	Ec asd	ATGAAAAATGTGGGATTCATTGGCTGGAGGGGCATGGTCGGCTCTGTACTTATGCAACGGATGGTGGAGGAGAGGGACTTTGATGCGATCCGACCCGTATTCTTTTCAACGAGTCAACTCGGACAAGCAGCTCCGTCTTTCGGTGGAACTACTGGTACTCTTCAGGATGCATTCGATCTTGAAGCACTGAAGGCTCTTGACATCATCGTAACCTGTCAGGGAGGCGACTACACTAATGAAATTTATCCTAAGCTCCGAGAGAGCGGTTGGCAAGGATACTGGATTGATGCAGCAAGTAGTCTCCGAATGAAGGACGATGCGATTATAATCCTGGACCCGGTGAATCAGGACGTAATAACTGACGGCCTCAACAATGGGATAAGGACGTTCGTTGGTGGG…
	Sc MET3	ATGCCGGCCCCACATGGCGGCATCTTGCAAGATCTCATAGCGCGCGACGCTTTGAAGAAGAATGAACTCTTGTCTGAAGCGCAGAGCTCAGATATCCTTGTGTGGAACCTGACCCCGAGACAACTGTGCGATATAGAGCTCATCTTGAATGGGGGCTTTAGTCCGCTCACAGGATTCCTTAACGAAAACGATTACTCATCTGTTGTCACAGACTCTCGACTCGCAGATGGGACTCTTTGGACTATACCTATTACCTTGGACGTAGACGAGGCGTTTGCGAATCAAATAAAACCTGACACCCGAATAGCGCTCTTCCAGGACGACGAGATACCGATAGCTATACTCACAGTTCAGGATGTTTACAAACCTAATAAAACAATTGAGGCAGAAAAAGTGTTC…
	Sc MET14	ATGGCAACGAATATCACCTGGCACCCAAACTTGACTTACGATGAGCGAAAGGCTCTTCGGAAGCAGGATGGTTGTACCATCTGGTTGACAGGGCTGAGTGCAAGTGGCAAGAGCACCATTGCTTGCGCCCTGGAGCAACTGCTTCTTCAGAAAAATCTTTCCGCATACCGCCTGGATGGCGACAACATTAGGTTTGGGCTTAACAAAGACTTGGGCTTCAGCGAGAAGGACCGCAATGAGAATATCCGAAGGATTAGTGAGGTTAGCAAGCTCTTCGCTGACTCTTGTGCAATATCAATTACGTCATTCATTTCTCCATATCGCGTGGACAGGGACAGAGCAAGAGAATTGCACAAAGAAGCTGGACTCAAGTTTATTGAAATCTTTGTCGACGTTCCC…
	Sc MET16	ATGAAAACTTATCATCTTAATAATGATATAATCGTCACTCAAGAGCAGCTTGACCACTGGAATGAGCAGCTCATAAAACTCGAAACTCCTCAAGAGATAATAGCCTGGTCAATAGTCACATTTCCCCATTTGTTTCAAACTACTGCTTTTGGACTGACAGGCTTGGTGACAATCGACATGCTCAGCAAGCTCTCAGAGAAGTATTATATGCCTGAGCTGTTGTTTATAGATACGTTGCATCACTTTCCCCAAACGCTTACTTTGAAGAATGAGATTGAAAAGAAATATTATCAGCCGAAAAACCAAACGATTCATGTCTACAAACCAGATGGATGTGAGTCCGAAGCAGACTTTGCAAGTAAGTATGGGGATTTTCTTTGGGAAAAAGATGACGATAAA…
	Sc MET5	ATGACTGCTTCTGACTTGTTGACCTTGCCTCAGCTGCTGGCGCAATACAGTAGTTCAGCTCCACAGAACAAAGTATTCTATACGACCTCCACGAAAAACTCACATTCCAGCTTTAAAGGTCTCGAATCTGTGGCGACCGACGCTACCCATCTGCTCAACAACCAAGATCCCCTTAATACTATAAAAGACCAGCTCTCTAAGGATATCTTGACCACAGTCTTTACGGATGAAACAACGCTTGTGAAGTCAATTCATCATTTGTACTCACTGCCGAACAAACTTCCGTTGGTAATCACTGTCGATTTGAACCTCCAAGATTACTCAGCCATTCCCGCGCTGAAAGACTTGAGCTTTCCTATACTTATCAGTAGCGATCTTCAGACAGCGATCTCAAACGCA…
	Sc MET10	ATGCCCGTAGAATTCGCGACTAATCCGTTCGGGGAAGCCAAGAACGCCACTAGTCTTCCGAAGTATGGAACGCCTGTGACGGCCATCTCTTCAGTCTTGTTTAATAACGTGGACTCCATCTTCGCGTATAAATCCTTTTCTCAACCTGACTTGCTCCACCAGGACCTTAAAAAATGGAGTGAGAAGCGGGGAAACGAGAGCAGGGGAAAGCCCTTCTTTCAAGAATTGGACATTCGCTCTGGGGCTGGTCTGGCGCCTCTCGGATTCAGTCATGGCTTGAAGAACACTACAGCTATAGTAGCACCCGGCTTCAGTCTGCCGTACTTCATAAATAGCCTCAAGACAGTTTCTCACGATGGTAAGTTTCTTTTGAATGTGGGTGCTCTCAACTACGATAAT…
	Sc MET2	ATGTCCCATACACTGAAATCCAAGACCCTCCAAGAGTTGGACATTGAGGAAATTAAAGAAACAAATCCCTTGCTCAAACTTGTGCAAGGCCAACGGATAGTTCAGGTCCCGGAGCTCGTGTTGGAATCCGGGGTGGTAATAAACAATTTTCCTATAGCATATAAGACGTGGGGCACCTTGAATGAGGCAGGCGACAACGTCCTGGTCATATGCCATGCCTTGACGGGGTCAGCTGATGTCGCGGATTGGTGGGGGCCCCTTCTCGGAAACGACCTTGCCTTTGACCCAAGTAGGTTCTTTATTATATGTCTTAACAGTATGGGCTCACCATACGGGTCATTTAGTCCCCTTACTATCAACGAAGAGACGGGCGTTAGGTACGGCCCTGAGTTTCCTCTG…
	Sc MET17	ATGCCATCTCATTTTGATACGGTCCAGCTTCATGCGGGCCAAGAAAATCCTGGGGATAACGCCCATAGAAGCCGAGCAGTACCGATATATGCCACGACGAGCTATGTATTCGAAAATTCAAAACATGGATCTCAGCTCTTTGGACTCGAGGTCCCAGGCTATGTGTACTCTAGGTTTCAAAATCCGACTTCTAATGTTCTTGAAGAACGAATTGCTGCGCTTGAGGGGGGAGCAGCGGCACTTGCAGTTTCATCCGGGCAAGCCGCCCAGACCCTTGCCATACAAGGTCTTGCACATACGGGAGATAATATCGTTTCCACGTCCTACCTCTACGGTGGAACATACAACCAGTTCAAGATCAGTTTTAAAAGGTTTGGGATCGAAGCGCGCTTTGTTGAA…
Lysine	Ec metL	ATGTCAGTAATAGCCCAAGCCGGCGCGAAAGGTAGGCAACTTCACAAGTTCGGGGGGTCCTCTCTCGCGGATGTAAAGTGTTACCTGCGGGTTGCTGGTATCATGGCCGAATATTCACAGCCCGATGATATGATGGTTGTTAGTGCTGCCGGATCAACAACAAACCAGCTTATCAATTGGTTGAAACTGTCCCAAACAGACCGACTCTCCGCTCATCAAGTCCAGCAAACTCTTAGGAGGTACCAGTGTGATCTGATAAGTGGGCTGCTCCCCGCTGAAGAAGCAGATAGTCTCATAAGTGCTTTTGTCTCCGATCTTGAAAGACTGGCTGCTCTTCTGGATTCTGGGATTAACGACGCGGTTTATGCGGAGGTGGTGGGTCACGGGGAAGTATGGAGC…
	Ec asd	ATGAAAAATGTGGGATTCATTGGCTGGAGGGGCATGGTCGGCTCTGTACTTATGCAACGGATGGTGGAGGAGAGGGACTTTGATGCGATCCGACCCGTATTCTTTTCAACGAGTCAACTCGGACAAGCAGCTCCGTCTTTCGGTGGAACTACTGGTACTCTTCAGGATGCATTCGATCTTGAAGCACTGAAGGCTCTTGACATCATCGTAACCTGTCAGGGAGGCGACTACACTAATGAAATTTATCCTAAGCTCCGAGAGAGCGGTTGGCAAGGATACTGGATTGATGCAGCAAGTAGTCTCCGAATGAAGGACGATGCGATTATAATCCTGGACCCGGTGAATCAGGACGTAATAACTGACGGCCTCAACAATGGGATAAGGACGTTCGTTGGTGGG…
	Cg dapA	ATGAGTACCGGATTGACGGCAAAGACCGGTGTGGAACACTTCGGCACTGTAGGGGTAGCGATGGTTACGCCCTTCACTGAATCTGGAGACATAGATATAGCCGCCGGACGAGAGGTTGCGGCTTACTTGGTAGACAAAGGATTGGATAGCCTTGTTCTCGCCGGCACTACCGGCGAGAGTCCGACCACTACGGCGGCTGAAAAGCTGGAATTGTTGAAAGCCGTCAGAGAGGAGGTTGGAGACAGAGCGAAGCTCATTGCAGGTGTAGGGACAAATAACACTCGAACCTCAGTTGAGCTGGCGGAGGCAGCGGCATCCGCAGGAGCAGACGGGCTTCTCGTAGTTACGCCTTACTACTCCAAACCCTCCCAAGAGGGGCTCCTCGCCCACTTCGGAGCC…
	Cg dapB	ATGGGCATTAAAGTCGGCGTACTCGGTGCAAAGGGTCGCGTAGGGCAAACAATTGTGGCGGCAGTGAACGAATCCGACGATCTCGAGCTTGTCGCCGAGATCGGTGTAGACGATGACTTGAGTCTTTTGGTCGATAATGGGGCAGAGGTAGTCGTGGATTTTACCACCCCCAATGCTGTGATGGGGAACCTGGAGTTCTGTATTAACAATGGGATTAGCGCAGTGGTAGGAACTACGGGGTTCGACGACGCTCGGCTGGAGCAAGTGCGCGATTGGCTCGAGGGCAAGGATAACGTGGGGGTGCTGATTGCTCCCAATTTCGCTATCTCCGCAGTCCTGACGATGGTCTTTTCAAAACAGGCCGCGCGGTTCTTCGAGAGCGCCGAGGTAATCGAATTG…
	Cg ddh	ATGACGAACATTAGAGTGGCAATTGTTGGATACGGAAATCTTGGCAGGTCAGTTGAGAAGCTGATAGCTAAACAGCCCGATATGGATTTGGTCGGCATTTTCAGCAGGAGAGCCACGCTTGACACCAAAACACCTGTCTTTGACGTGGCAGACGTTGACAAGCACGCAGATGATGTTGATGTTCTTTTTCTTTGTATGGGTTCAGCAACGGACATTCCAGAACAAGCGCCTAAATTCGCACAGTTCGCATGTACCGTTGACACATACGACAATCACCGGGACATCCCAAGGCATCGGCAGGTCATGAATGAGGCTGCGACGGCTGCTGGAAACGTTGCTCTTGTCTCCACAGGTTGGGACCCCGGGATGTTCAGCATAAATCGGGTCTACGCAGCAGCA…
	Cg lysA	ATGGCGACGGTAGAAAACTTTAACGAGCTCCCGGCCCACGTTTGGCCCCGCAATGCTGTTCGACAAGAAGACGGCGTTGTTACAGTGGCAGGAGTGCCATTGCCAGACCTGGCCGAGGAGTATGGCACGCCTCTCTTCGTCGTCGATGAGGATGACTTTAGATCCCGGTGCCGGGATATGGCAACAGCCTTTGGCGGGCCTGGTAATGTCCACTACGCAAGCAAAGCATTTCTCACGAAAACAATTGCGCGCTGGGTAGACGAAGAGGGCCTTGCTCTCGACATTGCTAGCATCAACGAACTGGGAATTGCCCTCGCAGCGGGGTTCCCAGCAAGTCGCATCACGGCTCACGGAAACAACAAGGGGGTTGAATTTTTGCGAGCTCTCGTTCAAAATGGC…
Valine	Ec ilvB	ATGGCCAGCAGCGGCACCACCAGCACCCGCAAGCGCTTCACCGGCGCCGAGTTCATCGTGCACTTCCTGGAGCAGCAGGGCATCAAGATCGTGACCGGCATCCCCGGCGGCAGCATCCTGCCCGTGTACGACGCCCTGAGCCAGAGCACCCAGATCCGCCACATCCTGGCCCGCCACGAGCAGGGCGCCGGCTTCATCGCCCAGGGCATGGCCCGCACCGACGGCAAGCCCGCCGTGTGCATGGCCTGCAGCGGCCCCGGCGCCACCAACCTGGTGACCGCCATCGCCGACGCCCGCCTGGACAGCATCCCCCTGATCTGCATCACCGGCCAGGTGCCCGCCAGCATGATCGGCACCGACGCCTTCCAGGAGGTGGACACCTACGGCATCAGCATCCCC…
	Ec ilvN	ATGCAGAACACCACCCACGACAACGTGATCCTGGAGCTGACCGTGCGCAACCACCCCGGCGTGATGACCCACGTGTGCGGCCTGTTCGCCCGCCGCGCCTTCAACGTGGAGGGCATCCTGTGCCTGCCCATCCAGGACAGCGACAAGAGCCACATCTGGCTGCTGGTGAACGACGACCAGCGCCTGGAGCAGATGATCAGCCAGATCGACAAGCTGGAGGACGTGGTGAAGGTGCAGCGCAACCAGAGCGACCCCACCATGTTCAACAAGATCGCCGTGTTCTTCCAG
	Ec ilvC	ATGGCGAATTATTTCAACACGCTGAATCTGCGACAACAACTGGCTCAACTGGGCAAGTGTCGCTTCATGGGACGGGATGAATTTGCAGACGGTGCCTCATACCTTCAGGGGAAGAAAGTTGTTATTGTTGGGTGTGGCGCCCAGGGGTTGAACCAGGGACTTAATATGAGAGATAGCGGATTGGATATTTCCTACGCGCTTAGGAAGGAAGCCATAGCAGAGAAAAGGGCAAGCTGGCGGAAAGCTACCGAAAACGGGTTTAAGGTCGGGACATATGAGGAGCTGATACCGCAGGCAGACCTGGTTATCAATTTGACACCGGACAAACAACATAGTGACGTTGTTAGAACGGTTCAGCCACTGATGAAAGATGGAGCCGCACTCGGCTACTCCCACGGG…
	Ec ilvD	ATGCCTAAATACCGAAGCGCCACAACGACGCACGGACGCAATATGGCGGGGGCAAGGGCTCTGTGGCGAGCCACCGGAATGACCGACGCCGATTTTGGCAAACCCATTATTGCGGTCGTAAATTCCTTCACACAGTTCGTCCCCGGTCATGTGCACCTCCGCGACCTTGGAAAACTCGTCGCCGAACAGATAGAGGCTGCTGGCGGAGTCGCCAAAGAGTTCAATACTATAGCTGTTGATGATGGGATTGCAATGGGACACGGAGGAATGCTGTATTCACTTCCGAGCAGGGAACTCATCGCGGACTCAGTCGAATACATGGTGAACGCACACTGCGCGGACGCTATGGTCTGTATTAGTAATTGTGATAAGATTACCCCCGGAATGTTGATGGCCAGC…
Leucine	Ec ilvB	ATGGCCAGCAGCGGCACCACCAGCACCCGCAAGCGCTTCACCGGCGCCGAGTTCATCGTGCACTTCCTGGAGCAGCAGGGCATCAAGATCGTGACCGGCATCCCCGGCGGCAGCATCCTGCCCGTGTACGACGCCCTGAGCCAGAGCACCCAGATCCGCCACATCCTGGCCCGCCACGAGCAGGGCGCCGGCTTCATCGCCCAGGGCATGGCCCGCACCGACGGCAAGCCCGCCGTGTGCATGGCCTGCAGCGGCCCCGGCGCCACCAACCTGGTGACCGCCATCGCCGACGCCCGCCTGGACAGCATCCCCCTGATCTGCATCACCGGCCAGGTGCCCGCCAGCATGATCGGCACCGACGCCTTCCAGGAGGTGGACACCTACGGCATCAGCATCCCC…
	Ec ilvN	ATGCAGAACACCACCCACGACAACGTGATCCTGGAGCTGACCGTGCGCAACCACCCCGGCGTGATGACCCACGTGTGCGGCCTGTTCGCCCGCCGCGCCTTCAACGTGGAGGGCATCCTGTGCCTGCCCATCCAGGACAGCGACAAGAGCCACATCTGGCTGCTGGTGAACGACGACCAGCGCCTGGAGCAGATGATCAGCCAGATCGACAAGCTGGAGGACGTGGTGAAGGTGCAGCGCAACCAGAGCGACCCCACCATGTTCAACAAGATCGCCGTGTTCTTCCAG
	Ec ilvC	ATGGCGAATTATTTCAACACGCTGAATCTGCGACAACAACTGGCTCAACTGGGCAAGTGTCGCTTCATGGGACGGGATGAATTTGCAGACGGTGCCTCATACCTTCAGGGGAAGAAAGTTGTTATTGTTGGGTGTGGCGCCCAGGGGTTGAACCAGGGACTTAATATGAGAGATAGCGGATTGGATATTTCCTACGCGCTTAGGAAGGAAGCCATAGCAGAGAAAAGGGCAAGCTGGCGGAAAGCTACCGAAAACGGGTTTAAGGTCGGGACATATGAGGAGCTGATACCGCAGGCAGACCTGGTTATCAATTTGACACCGGACAAACAACATAGTGACGTTGTTAGAACGGTTCAGCCACTGATGAAAGATGGAGCCGCACTCGGCTACTCCCACGGG…
	Ec ilvD	ATGCCTAAATACCGAAGCGCCACAACGACGCACGGACGCAATATGGCGGGGGCAAGGGCTCTGTGGCGAGCCACCGGAATGACCGACGCCGATTTTGGCAAACCCATTATTGCGGTCGTAAATTCCTTCACACAGTTCGTCCCCGGTCATGTGCACCTCCGCGACCTTGGAAAACTCGTCGCCGAACAGATAGAGGCTGCTGGCGGAGTCGCCAAAGAGTTCAATACTATAGCTGTTGATGATGGGATTGCAATGGGACACGGAGGAATGCTGTATTCACTTCCGAGCAGGGAACTCATCGCGGACTCAGTCGAATACATGGTGAACGCACACTGCGCGGACGCTATGGTCTGTATTAGTAATTGTGATAAGATTACCCCCGGAATGTTGATGGCCAGC…
	Ec leuA	ATGAGCCAACAGGTGATAATCTTTGATACGACCCTGCGGGACGGAGAACAAGCATTGCAAGCATCACTTAGTGTCAAGGAGAAACTCCAAATCGCTCTGGCTTTGGAAAGAATGGGAGTTGATGTTATGGAGGTAGGTTTCCCGGTCTCTAGTCCAGGAGATTTTGAGTCCGTGCAGACGATAGCTAGGCAAGTTAAAAATAGCCGCGTATGCGCGCTGGCCAGATGTGTGGAGAAGGACATAGACGTCGCGGCCGAGAGTCTCAAGGTCGCTGAGGCGTTTCGCATTCACACCTTTATCGCGACCAGCCCAATGCACATTGCTACGAAACTGCGCAGTACTCTGGACGAAGTTATAGAGCGAGCAATATACATGGTCAAACGCGCTCGGAATTATACG…
	Ec leuC	ATGGCAAAAACACTGTATGAGAAATTGTTCGACGCCCACGTCGTCTATGAGGCAGAAAATGAAACTCCACTTCTGTATATAGATAGACACTTGGTACACGAAGTGACGTCCCCGCAGGCTTTTGATGGGCTTCGCGCACATGGAAGACCTGTACGACAACCTGGTAAGACGTTTGCTACCATGGACCATAACGTCTCCACGCAAACAAAAGATATCAACGCCTGTGGGGAGATGGCGAGGATCCAGATGCAAGAGTTGATCAAAAATTGTAAAGAGTTTGGCGTCGAACTCTACGACCTCAATCACCCCTATCAAGGTATTGTACATGTCATGGGACCAGAGCAGGGTGTCACGCTGCCGGGAATGACCATCGTTTGCGGGGACTCACATACAGCAACC…
	Ec leuD	ATGGCGGAAAAATTTATTAAGCACACAGGACTCGTAGTGCCGCTCGACGCGGCCAATGTCGACACAGACGCGATTATACCTAAACAGTTTCTCCAGAAGGTGACGCGGACTGGTTTTGGCGCACATCTCTTTAACGATTGGAGGTTTCTTGATGAAAAAGGGCAGCAACCAAATCCTGATTTCGTTCTGAATTTCCCGCAATATCAGGGTGCAAGTATCTTGTTGGCAAGAGAAAATTTTGGCTGCGGCTCCAGCCGGGAGCATGCGCCGTGGGCGTTGACCGACTACGGATTTAAAGTGGTGATCGCCCCGAGCTTTGCTGACATCTTTTATGGTAATTCATTTAACAATCAACTTTTGCCTGTAAAACTGAGCGATGCTGAGGTTGACGAGCTCTTT…
	Ec leuB	ATGAGCAAGAATTATCATATTGCAGTTCTCCCTGGGGATGGTATTGGCCCAGAGGTGATGACACAAGCTTTGAAAGTCCTGGACGCAGTCAGGAACCGATTCGCAATGCGGATTACCACATCTCACTATGACGTCGGGGGCGCTGCTATCGACAACCACGGCCAACCCTTGCCACCCGCTACGGTGGAGGGCTGCGAGCAAGCAGACGCCGTTCTGTTTGGTTCCGTCGGCGGACCCAAGTGGGAACACCTCCCCCCTGACCAACAGCCAGAACGAGGGGCGCTCCTCCCGTTGCGAAAGCACTTTAAGCTGTTTTCCAACCTCCGACCAGCCAAGTTGTACCAGGGCCTTGAAGCCTTTTGTCCGTTGCGCGCTGATATTGCCGCTAATGGATTCGAC…
Isoleucine	Ec ilvB	ATGGCCAGCAGCGGCACCACCAGCACCCGCAAGCGCTTCACCGGCGCCGAGTTCATCGTGCACTTCCTGGAGCAGCAGGGCATCAAGATCGTGACCGGCATCCCCGGCGGCAGCATCCTGCCCGTGTACGACGCCCTGAGCCAGAGCACCCAGATCCGCCACATCCTGGCCCGCCACGAGCAGGGCGCCGGCTTCATCGCCCAGGGCATGGCCCGCACCGACGGCAAGCCCGCCGTGTGCATGGCCTGCAGCGGCCCCGGCGCCACCAACCTGGTGACCGCCATCGCCGACGCCCGCCTGGACAGCATCCCCCTGATCTGCATCACCGGCCAGGTGCCCGCCAGCATGATCGGCACCGACGCCTTCCAGGAGGTGGACACCTACGGCATCAGCATCCCC…
	Ec ilvN	ATGCAGAACACCACCCACGACAACGTGATCCTGGAGCTGACCGTGCGCAACCACCCCGGCGTGATGACCCACGTGTGCGGCCTGTTCGCCCGCCGCGCCTTCAACGTGGAGGGCATCCTGTGCCTGCCCATCCAGGACAGCGACAAGAGCCACATCTGGCTGCTGGTGAACGACGACCAGCGCCTGGAGCAGATGATCAGCCAGATCGACAAGCTGGAGGACGTGGTGAAGGTGCAGCGCAACCAGAGCGACCCCACCATGTTCAACAAGATCGCCGTGTTCTTCCAG
	Ec ilvC	ATGGCGAATTATTTCAACACGCTGAATCTGCGACAACAACTGGCTCAACTGGGCAAGTGTCGCTTCATGGGACGGGATGAATTTGCAGACGGTGCCTCATACCTTCAGGGGAAGAAAGTTGTTATTGTTGGGTGTGGCGCCCAGGGGTTGAACCAGGGACTTAATATGAGAGATAGCGGATTGGATATTTCCTACGCGCTTAGGAAGGAAGCCATAGCAGAGAAAAGGGCAAGCTGGCGGAAAGCTACCGAAAACGGGTTTAAGGTCGGGACATATGAGGAGCTGATACCGCAGGCAGACCTGGTTATCAATTTGACACCGGACAAACAACATAGTGACGTTGTTAGAACGGTTCAGCCACTGATGAAAGATGGAGCCGCACTCGGCTACTCCCACGGG…
	Ec ilvD	ATGCCTAAATACCGAAGCGCCACAACGACGCACGGACGCAATATGGCGGGGGCAAGGGCTCTGTGGCGAGCCACCGGAATGACCGACGCCGATTTTGGCAAACCCATTATTGCGGTCGTAAATTCCTTCACACAGTTCGTCCCCGGTCATGTGCACCTCCGCGACCTTGGAAAACTCGTCGCCGAACAGATAGAGGCTGCTGGCGGAGTCGCCAAAGAGTTCAATACTATAGCTGTTGATGATGGGATTGCAATGGGACACGGAGGAATGCTGTATTCACTTCCGAGCAGGGAACTCATCGCGGACTCAGTCGAATACATGGTGAACGCACACTGCGCGGACGCTATGGTCTGTATTAGTAATTGTGATAAGATTACCCCCGGAATGTTGATGGCCAGC…
	Ec: Eschericia coli
	Sc: Saccharomyces cerevisiae
	Cg: Corynebacterium glutamicum
