# Supplementary material for: Resurrecting essential amino acid biosynthesis in mammalian cells
Source: eLife. 2022 Sep 27;11:e72847. doi: 10.7554/eLife.72847 (PMC9560156; doi:10.7554/eLife.72847)
Supplement: Supplementary file 4. [file elife-72847-supp4.xlsx]

## Sheet: Sheet1
Supplementary file 4. Complete amino acid prototrophy pathway EC numbers
Histidine 1
2.7.6.1
2.4.2.17
3.6.1.31
3.5.4.19
5.3.1.16
4.3.2.10
4.2.1.19
2.6.1.9
3.1.3.15
1.1.1.23
Tryptophan (from E4P) 1
2.5.1.54
4.2.3.4
4.2.1.10
1.1.1.25
2.7.1.71
2.5.1.19
4.2.3.5
4.1.3.27
2.4.2.18
5.3.1.24
4.1.1.48
4.2.1.20
Tyrosine (from E4P) 1.1	Tyrosine (from E4P) 1.2	Tyrosine (from E4P) 1.3	Tyrosine (from E4P) 1.4	Tyrosine (from E4P) 1.5	Tyrosine (from E4P) 1.6	Tyrosine (from Phe) 2
2.5.1.54	2.5.1.54	2.5.1.54	2.5.1.54	2.5.1.54	2.5.1.54	1.14.16.1
4.2.3.4	4.2.3.4	4.2.3.4	4.2.3.4	4.2.3.4	4.2.3.4
4.2.1.10	4.2.1.10	4.2.1.10	4.2.1.10	4.2.1.10	4.2.1.10
1.1.1.25	1.1.1.25	1.1.1.25	1.1.1.25	1.1.1.25	1.1.1.25
2.7.1.71	2.7.1.71	2.7.1.71	2.7.1.71	2.7.1.71	2.7.1.71
2.5.1.19	2.5.1.19	2.5.1.19	2.5.1.19	2.5.1.19	2.5.1.19
4.2.3.5	4.2.3.5	4.2.3.5	4.2.3.5	4.2.3.5	4.2.3.5
5.4.99.5	5.4.99.5	5.4.99.5	5.4.99.5	5.4.99.5	5.4.99.5
1.3.1.13	1.3.1.13	1.3.1.13	1.3.1.13	2.6.1.79	2.6.1.79
2.6.1.1	2.6.1.5	2.6.1.27	2.6.1.57	1.3.1.78	1.3.1.43
Phenylalanine (from E4P) 1.1	Phenylalanine (from E4P) 1.2	Phenylalanine (from E4P) 1.3	Phenylalanine (from E4P) 1.4	Phenylalanine (from E4P) 1.5	Phenylalanine (from E4P) 1.6
2.5.1.54	2.5.1.54	2.5.1.54	2.5.1.54	2.5.1.54	2.5.1.54
4.2.3.4	4.2.3.4	4.2.3.4	4.2.3.4	4.2.3.4	4.2.3.4
4.2.1.10	4.2.1.10	4.2.1.10	4.2.1.10	4.2.1.10	4.2.1.10
1.1.1.25	1.1.1.25	1.1.1.25	1.1.1.25	1.1.1.25	1.1.1.25
2.7.1.71	2.7.1.71	2.7.1.71	2.7.1.71	2.7.1.71	2.7.1.71
2.5.1.19	2.5.1.19	2.5.1.19	2.5.1.19	2.5.1.19	2.5.1.19
4.2.3.5	4.2.3.5	4.2.3.5	4.2.3.5	4.2.3.5	4.2.3.5
5.4.99.5	5.4.99.5	5.4.99.5	5.4.99.5	5.4.99.5	5.4.99.5
4.2.1.51	4.2.1.51	4.2.1.51	4.2.1.51	2.6.1.79	4.2.1.51
2.6.1.1	2.6.1.5	2.6.1.27	2.6.1.57	4.2.1.91	2.6.1.57
Serine (from G3P) 1.1	Serine (from G3P) 1.2	Serine (from G3P) 1.3	Serine (from Gly) 2
1.1.1.95	3.1.3.38	3.1.3.38	2.1.2.1
2.6.1.52	1.1.1.81	1.1.1.81
3.1.3.3	2.6.1.45	2.6.1.51
Methionine (from Asp) 1.1	Methionine (from Asp) 1.2	Methionine (from Asp) 1.3
2.7.2.4	2.7.2.4	2.7.2.4
1.2.1.11	1.2.1.11	1.2.1.11
1.1.1.3	1.1.1.3	1.1.1.3
2.7.1.39	2.3.1.31	2.3.1.31
2.5.1.48	2.5.1.49	2.5.1.49
4.4.1.13	2.3.1.13	2.3.1.14
2.1.1.14
Cysteine (from Ser) 1	Cysteine (from Met) 2.1	Cysteine (from Met) 2.2	Cysteine (from Asp) 3	Cysteine (from G3P) 4
2.3.1.30	2.5.1.6	2.5.1.6	2.7.2.4	1.1.1.95
2.5.1.47	2.1.1.37	2.1.1.-	1.2.1.11	2.6.1.52
	3.3.1.1	3.2.2.9	1.1.1.3	2.5.1.65
	4.2.1.22	3.3.1.1	2.3.1.31
	4.4.1.1	4.2.1.22	2.5.1.49
		4.4.1.1	4.2.1.22
			4.4.1.1
Threonine (from Asp) 1
2.7.2.4
1.2.1.11
1.1.1.3
2.7.1.39
4.2.3.1
Alanine (from pyr) 1	Alanine (from Cys) 2
2.2.1.6	2.8.1.7
1.1.1.86
4.2.1.9
2.6.1.42
2.6.1.66
Aspartate( from Glu) 1	Aspartate( from Asn) 2.1	Aspartate( from Asn) 2.2
2.6.1.1	3.5.1.1	3.5.1.38
Asparagine (from Asp) 1.1	Asparagine (from Asp) 1.2
6.3.5.4	6.3.1.1
Lysine (from 2-oxoglu) 1.1	Lysine (from 2-oxoglu) 1.2	Lysine (from 2-oxoglu) 1.3	Lysine (from 2-oxoglu) 1.4	Lysine (from Asp) 2
2.3.3.14	2.3.3.14	2.3.3.14	2.3.3.14	2.7.2.4
4.2.1.114	4.2.1.36	4.2.1.114	4.2.1.36	1.2.1.11
1.1.1.87	1.1.1.87	1.1.1.286	1.1.1.286	4.3.3.7
2.6.1.39	2.6.1.39	2.6.1.39	2.6.1.39	1.17.1.8
1.2.1.95	1.2.1.95	1.2.1.95	1.2.1.95	2.6.1.83
1.5.1.10	1.5.1.10	1.5.1.10	1.5.1.10	5.1.1.7
1.5.1.7	1.5.1.7	1.5.1.7	1.5.1.7	4.1.1.20
Glutamate (from Gln) 1	Glutamate (from2-oxoglu) 1.1	Glutamate (from2-oxoglu) 1.2	Glutamate (from2-oxoglu) 1.3	Glutamate (from2-oxoglu) 1.3
1.4.1.13	1.4.1.3	1.4.1.4	1.4.1.14	1.4.7.1
Glutamine (from Glu) 1
6.3.1.2
Arginine (from Glu) 1.1	Arginine (from Glu) 1.2	Arginine (from Glu) 1.3	Arginine (from Pro) 2
2.3.1.1	2.3.1.1	2.7.2.11	1.5.5.2
2.7.2.8	2.7.2.8	1.2.1.41	2.6.1.13
1.2.1.38	1.2.1.38	2.6.1.13	6.3.5.5
2.6.1.11	2.6.1.11	6.3.5.5	2.1.3.3
3.5.1.16	2.3.1.35	2.1.3.3	6.3.4.5
6.3.5.5	6.3.5.5	6.3.4.5	4.3.2.1
2.1.3.3	2.1.3.3	4.3.2.1
6.3.4.5	6.3.4.5
4.3.2.1	4.3.2.1
Proline (from Glu) 1	Proline (from Arg) 2.1	Proline (from Arg) 2.2	Proline (from Glu) 3.1	Proline (from Glu) 3.2	Proline (from Glu) 3.3
2.7.2.11	3.5.3.6	3.5.3.6	2.7.2.11	2.7.2.11	2.7.2.11
1.2.1.41	2.1.3.3	3.5.1.20	1.2.1.41	1.2.1.41	1.2.1.41
1.5.1.2	2.6.1.13	2.6.1.13	2.6.1.13	2.6.1.13	2.6.1.13
	1.5.1.2	1.5.1.2	2.6.1.13	2.6.1.8	2.6.1.8
			1.5.1.2	1.5.1.1	1.5.1.49
Glycine (from Ser) 1	Glycine (from isocit) 2	Glycine (from Thr) 3.1	Glycine (from Thr) 3.2
2.1.2.1	4.1.3.1	4.1.2.5	4.1.2.48
	2.6.1.44
Valine (from pyr) 1
2.2.1.6
1.1.1.86
4.2.1.9
2.6.1.42
Leucine (from Val) 1.1	Leucine (from Val) 1.2
2.3.3.13	2.3.3.13
4.2.1.33	4.2.1.33
1.1.1.85	1.1.1.85
2.6.1.6	2.6.1.42
Isoleucine (from Thr) 1
4.3.1.19
2.2.1.6
1.1.1.86
4.2.1.9
2.6.1.42
